# Supplementary material for: Asymmetric synthesis of highly sterically congested α-tertiary aminesviaorganocatalyzed kinetic resolution
Source: Royal Society of Chemistry journal article supplement (doi:10.1039/d3cc00653k), 2023-01-01

## Table of Contents

|                                                                |    |
|----------------------------------------------------------------|----|
| General Information:.....                                      | 2  |
| Synthesis of racemic $\alpha$ -tertiary amine substrates ..... | 3  |
| Kinetic resolution of $\alpha$ -tertiary amines <b>1</b> ..... | 17 |
| Large-scale kinetic resolution of racemic <b>1a</b> .....      | 40 |
| Transformations of the chiral products .....                   | 41 |
| X-Ray Crystal Structure.....                                   | 44 |
| HPLC traces:.....                                              | 46 |
| NMR spectrums: .....                                           | 99 |

## General Information:

Unless otherwise noted, all commercial reagents were used without further purification. Chloroform, toluene, ether, THF were purified by passage through an activated alumina column under argon. Thin-layer chromatography (TLC) analysis of reaction mixtures was performed using Huanghai silica gel HSGF254 TLC plates, and visualized under UV or by staining with ceric ammonium molybdate. Flash column chromatography was carried out on Huanghai Silica Gel HHGJ-300, 300-400 mesh. Nuclear magnetic resonance (NMR) spectra were recorded using Bruker Avance III HD spectrometer (FT, 500 MHz for  $^1\text{H}$ , 126 MHz for  $^{13}\text{C}$ , 471 MHz for  $^{19}\text{F}$ , or 400 MHz for  $^1\text{H}$ , 101 MHz for  $^{13}\text{C}$ , 376 MHz for  $^{19}\text{F}$ ).  $^1\text{H}$  and  $^{13}\text{C}$  chemical shifts are reported in ppm downfield of tetramethylsilane and referenced to residual solvent peak ( $\text{CDCl}_3$ ,  $\delta\text{H} = 7.26$  and  $\delta\text{C} = 77.16$ ;  $d_6$ -Acetone,  $\delta\text{H} = 2.05$  and  $\delta\text{C} = 29.84$ ). Multiplicities are reported using the following abbreviations: s = singlet, d = doublet, t = triplet, q = quartet, m = multiplet, br = broad resonance. FT-IR spectra were recorded on ThermoFisher Scientific Nicolet iS5 Spectrometer, and absorption frequencies are reported in reciprocal centimeters ( $\text{cm}^{-1}$ ). Mass spectral data were obtained from the Agilent Technologies 6230 TOF LC/MS spectrometer in electrospray ionization (ESI<sup>+</sup>) mode. Optical rotations were measured with an Autopol V Plus/VI digital polarimeter. X-Ray structure analyses were performed using a Bruker D8 Venture X-ray single crystal diffractometer and D8 Venture metalJet X-Ray single crystal diffractometer. Enantiomeric excesses were determined on an Agilent 1260 Chiral HPLC using IA, IB, IC, ID, IG columns. Racemic products were synthesized by carrying out the reactions using ( $\pm$ )-**TMEP** as catalyst.

## Synthesis of the racemic $\alpha$ -tertiary amine substrates

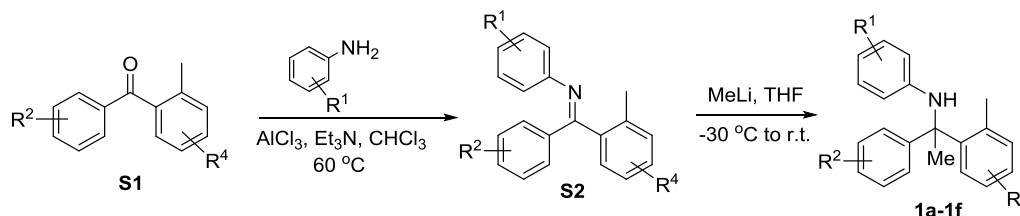

Under  $N_2$  atmosphere, a solution of arylamines (1.2 eq) in  $Et_3N$  (12.0 eq) was added dropwisely to a solution of **S1** (10 mmol, 1.0 eq) and  $AlCl_3$  (4.0 eq) in chloroform (40 mL) at  $0\text{ }^\circ C$ . After stirring at  $60\text{ }^\circ C$  (by oil bath) overnight, the reaction mixture was quenched with 1 N  $NaOH$  solution and filtered through celite. Then the filtrate was extracted with DCM for three times. The combined organic layer was dried over  $Na_2SO_4$  and concentrated under vacuum to give a residue, which was purified by silica gel column chromatography (petroleum:EtOAc: $Et_3N$ , 400:2:1) to give product **S2**.

Under  $N_2$  atmosphere,  $MeLi$  (12.0 mmol, 1.6 M, 4.0 eq) was added dropwisely into a solution of **S2** (3.0 mmol, 1.0 eq) in  $THF$  (20 mL) at  $-30\text{ }^\circ C$ . After completion of the addition, the mixture was stirred overnight and slowly warmed up to room temperature. After the consumption of **S2** as monitored by TLC analysis, the reaction was quenched with saturated aqueous solution of  $NH_4Cl$ , and the mixture was extracted with EtOAc for 3 times. The combined organic layers were dried over  $Na_2SO_4$ , filtered and concentrated under vacuum to give a residue, which was purified by silica gel column chromatography (petroleum:EtOAc, 200:1) to give the product **1** (**1a-1f**).

### *N*-(1-phenyl-1-(*o*-tolyl)ethyl)aniline (**1a**)

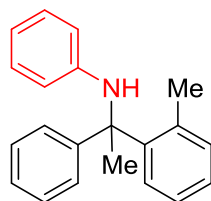

**1a** was prepared in 2.3 mmol scale of **S2** and obtained as a white solid (660 mg, 98% yield).  $^1H$  NMR (400 MHz,  $CDCl_3$ )  $\delta$  7.64 (dd,  $J = 7.7, 1.6$  Hz, 1H), 7.33 – 7.27 (m, 4H), 7.27 – 7.19 (m,

3H), 7.08 (dd,  $J = 7.3, 1.7$  Hz, 1H), 7.05 – 6.97 (m, 2H), 6.63 (t,  $J = 7.3$  Hz, 1H), 6.48 (d,  $J = 8.0$  Hz, 2H), 4.46 (s, 1H), 2.10 (s, 3H), 2.06 (s, 3H).  $^{13}\text{C}$  NMR (101 MHz,  $\text{CDCl}_3$ )  $\delta$  148.3, 145.9, 143.4, 137.2, 132.9, 128.8, 128.6, 128.4, 127.5, 127.0, 126.0, 125.8, 117.6, 115.8, 63.4, 29.2, 22.4. HRMS (ESI)  $m/z$ :  $[\text{M}+\text{H}]^+$  calculated for  $\text{C}_{21}\text{H}_{22}\text{F}_3\text{N}^+$  288.1747; Found 288.1762.

### 3-methyl-*N*-(1-phenyl-1-(*o*-tolyl)ethyl)aniline (**1b**)

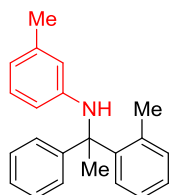

$^{13}\text{C}$  NMR (101 MHz,  $\text{CDCl}_3$ )

**1b** was prepared in 3.0 mmol scale of **S2** and obtained as a brown solid (810 mg, 85% yield).

$^1\text{H}$  NMR (400 MHz,  $\text{CDCl}_3$ )  $\delta$  7.64 (dd,  $J = 7.6, 1.6$  Hz, 1H), 7.31 – 7.18 (m, 7H), 7.08 (dd,  $J = 7.3, 1.8$  Hz, 1H), 6.89 (t,  $J = 7.8$  Hz, 1H), 6.47 (d,  $J = 7.5$  Hz, 1H), 6.34 (s, 1H), 6.29 – 6.22 (m, 1H), 4.41 (s, 1H), 2.16 (s, 3H), 2.09 (s, 3H), 2.05 (s, 3H).  $^{13}\text{C}$  NMR (101 MHz,  $\text{CDCl}_3$ )  $\delta$  148.4, 145.9, 143.5, 138.5, 137.2, 132.9, 128.7, 128.5, 128.4, 127.4, 126.9, 126.0, 125.8, 118.6, 116.8, 112.7, 63.3, 29.2, 22.4, 21.7. HRMS (ESI)  $m/z$ :  $[\text{M}+\text{H}]^+$  calculated for  $\text{C}_{22}\text{H}_{24}\text{N}^+$  302.1904; Found 302.1922.

### 3-methoxy-*N*-(1-phenyl-1-(*o*-tolyl)ethyl)aniline (**1c**)

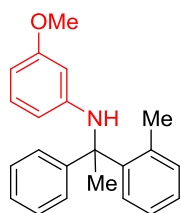

**1c** was prepared in 3 mmol scale of **S2** and obtained as yellow oil (937 mg, 98% yield).  $^1\text{H}$  NMR (500 MHz,  $\text{CDCl}_3$ )  $\delta$  7.55 (dd,  $J = 7.8, 1.5$  Hz, 1H), 7.27 – 7.09 (m, 7H), 7.00 (dd,  $J = 7.4, 1.5$  Hz, 1H), 6.84 (t,  $J = 8.1$  Hz, 1H), 6.12 (dd,  $J = 8.1, 2.3$  Hz, 1H), 6.04 (dd,  $J = 8.1, 2.2$  Hz, 1H), 5.92 (t,  $J = 2.3$  Hz, 1H), 4.42 (s, 1H), 3.49 (s, 3H), 2.02 (s, 3H), 1.98 (s, 3H).  $^{13}\text{C}$  NMR (126 MHz,  $\text{CDCl}_3$ )  $\delta$  160.3, 148.2, 147.3, 143.3, 137.4, 132.9, 129.5, 128.6, 128.3, 127.5, 127.0,

125.9, 125.9, 108.8, 103.2, 101.2, 63.4, 55.0, 29.5, 22.4. HRMS (ESI)  $m/z$ :  $[M+H]^+$  calculated for  $C_{22}H_{28}NO^+$  322.2166; Found 322.2175.

3-chloro-*N*-(1-phenyl-1-(*o*-tolyl)ethyl)aniline (**1d**)

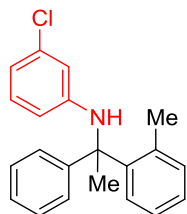

**1d** was prepared in 3.0 mmol scale as a white solid (892 mg, 93% yield).  $^1H$  NMR (500 MHz,  $CDCl_3$ )  $\delta$  7.52 (dd,  $J = 7.8, 1.6$  Hz, 1H), 7.26 – 7.10 (m, 7H), 7.00 (d,  $J = 7.3$  Hz, 1H), 6.80 (t,  $J = 8.0$  Hz, 1H), 6.49 (dd,  $J = 7.9, 2.0$  Hz, 1H), 6.38 (q,  $J = 2.0$  Hz, 1H), 6.23 (dd,  $J = 8.3, 2.2$  Hz, 1H), 4.47 (s, 1H), 2.00 (s, 3H), 1.95 (s, 3H).  $^{13}C$  NMR (126 MHz,  $CDCl_3$ )  $\delta$  147.9, 147.1, 142.7, 137.1, 134.4, 133.0, 129.8, 128.7, 128.3, 127.7, 127.2, 126.0, 125.8, 117.4, 115.2, 113.4, 63.4, 29.3, 22.4. HRMS (ESI)  $m/z$ :  $[M+H]^+$  calculated for  $C_{21}H_{21}ClN^+$  322.1358; Found 322.1365.

3-fluoro-*N*-(1-phenyl-1-(*o*-tolyl)ethyl)aniline (**1e**)

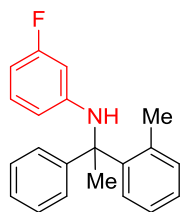

**1e** was prepared in 2 mmol scale of **S2** and obtained as a white solid (230 mg, 38% yield).  $^1H$  NMR (500 MHz,  $CDCl_3$ )  $\delta$  7.52 (d,  $J = 7.7$  Hz, 1H), 7.24-7.13 (m, 7H), 7.01 (d,  $J = 7.4$  Hz, 1H), 6.85 (q,  $J = 7.8$  Hz, 1H), 6.22 (td,  $J = 8.2, 2.1$  Hz, 1H), 6.19 – 6.14 (m, 1H), 6.05 (dd,  $J = 12.1, 2.4$  Hz, 1H), 4.53 (s, 1H), 2.01 (s, 3H), 1.96 (s, 3H).  $^{13}C$  NMR (126 MHz,  $CDCl_3$ )  $\delta$  163.6 (d,  $J = 242.0$  Hz), 147.9, 147.6 (d,  $J = 10.9$  Hz), 142.7, 137.2, 133.0, 129.8 (d,  $J = 10.4$  Hz), 128.7, 128.3, 127.7, 127.2, 126.0, 125.9, 111.3, 103.9 (d,  $J = 21.7$  Hz), 102.0 (d,  $J = 25.6$  Hz), 63.4, 29.3, 22.4.  $^{19}F$  NMR (471 MHz,  $CDCl_3$ )  $\delta$  -112.9. HRMS (ESI)  $m/z$ :  $[M+H]^+$  calculated for  $C_{21}H_{21}FN^+$  306.1653; Found 306.1657.

3,5-dimethyl-*N*-(1-phenyl-1-(*o*-tolyl)ethyl)aniline (**1f**)

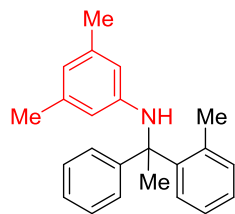

**1f** was prepared in 3 mmol scale of **S2** and obtained as green oil (864 mg, 91% yield).  $^1\text{H}$  NMR (500 MHz,  $\text{CDCl}_3$ )  $\delta$  7.56 (dd,  $J = 7.7, 1.5$  Hz, 1H), 7.25 – 7.09 (m, 7H), 6.99 (d,  $J = 7.3$  Hz, 1H), 6.23 (s, 1H), 6.04 (s, 2H), 4.26 (s, 1H), 2.02 (s, 6H), 2.01 (s, 3H), 1.97 (s, 3H).  $^{13}\text{C}$  NMR (126 MHz,  $\text{CDCl}_3$ )  $\delta$  148.5, 146.0, 143.7, 138.3, 137.2, 132.9, 128.5, 128.4, 127.4, 126.9, 126.0, 125.7, 119.7, 113.8, 63.3, 29.1, 22.4, 21.6. HRMS (ESI)  $m/z$ :  $[\text{M}+\text{H}]^+$  calculated for  $\text{C}_{23}\text{H}_{26}\text{N}^+$  316.2060; Found 316.2061.

#### Method B for the synthesis of substrate **1g-1m**:

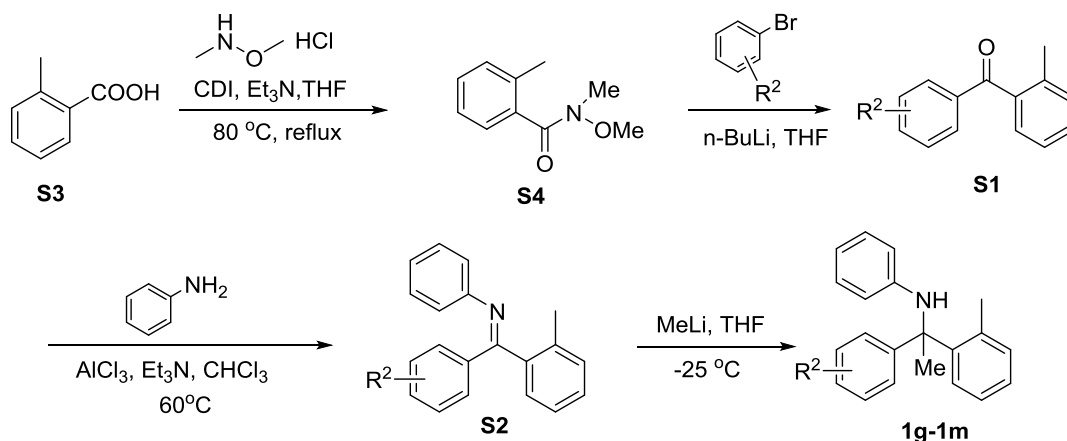

**General Procedure of method B for Synthesis of substrate **1g-1m**:** To a stirred solution of commercially available benzoic acid **S3** (17.1 g, 100 mmol) in anhydrous THF (170 mL) was added 1,1'-carbonyldiimidazole (16.2 g, 100 mmol) at 65 °C (by oil bath) and stirred for 2 h. Then a suspension of *N,O*-dimethylhydroxylamine hydrochloride (9.7 g, 100 mmol) and  $\text{Et}_3\text{N}$  (14 mL, 100 mmol) in THF (30 mL) was added, and the reaction mixture was refluxed at 80 °C (by oil bath) overnight. When the reaction was completed as determined by TLC analysis, the reaction mixture was cooled to room temperature and filtered through Celite. Then the filtrate was concentrated in vacuo to give a residue, which was purified by flash column chromatography (petroleum ether/ $\text{EtOAc} = 10:1$  to  $5:1$ ) to give the corresponding Weinreb amide **S4** (12.3 g, 69%).

Under N<sub>2</sub> atmosphere, n-BuLi (10 mmol 1.0 equiv) was added slowly to a solution of ArBr (10 mmol 1.0 equiv) in dry THF at -78 °C. After stirring for 30 min, the solution of **S4** (10 mmol in 10 mL THF, 1.0 equiv) was added slowly into the system. After stirring for 1 hour, the reaction mixture was quenched with saturated NH<sub>4</sub>Cl solution, and the mixture was extracted with EtOAc for 3 times. The combined organic layer was washed with saturated NaCl solution, dried over with anhydrous Na<sub>2</sub>SO<sub>4</sub>, filtered and concentrated under vacuum to give a residue, which was purified by flash column chromatography (petroleum ether/EtOAc, 150:1 to 100:1) to yield the products **S1**.

The same general procedures from **method A** were used for the synthesis substrates **1g-1m** starting from **S1**

*N*-(1-(*o*-tolyl)-1-(*p*-tolyl)ethyl)aniline (**1g**)

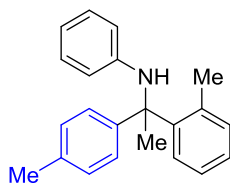

**1g** was prepared in 1.75 mmol scale of **S2** and obtained as a yellow solid (427 mg, 81% yield). <sup>1</sup>H NMR (500 MHz, CDCl<sub>3</sub>) δ 7.54 (dd, *J* = 7.8, 1.5 Hz, 1H), 7.20 – 7.06 (m, 4H), 7.05 – 6.96 (m, 3H), 6.96 – 6.89 (m, 2H), 6.54 (t, *J* = 7.3 Hz, 1H), 6.43 – 6.32 (m, 2H), 4.35 (s, 1H), 2.24 (s, 3H), 2.00 (s, 3H), 1.99 (s, 3H). <sup>13</sup>C NMR (126 MHz, CDCl<sub>3</sub>) δ 146.0, 145.4, 143.5, 137.2, 136.5, 132.9, 129.2, 128.8, 128.4, 127.4, 125.9, 125.8, 117.5, 115.6, 63.1, 29.2, 22.5, 21.1. HRMS (ESI) *m/z*: [M+H]<sup>+</sup> calculated for C<sub>22</sub>H<sub>24</sub>N<sup>+</sup> 302.1904; Found 302.1919.

*N*-(1-(4-chlorophenyl)-1-(*o*-tolyl)ethyl)aniline (**1h**)

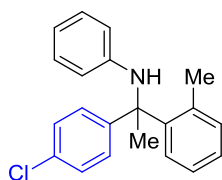

**1h** was prepared in 2.7 mmol scale of **S2** and obtained as yellow oil (509 mg, 59% yield). <sup>1</sup>H NMR (500 MHz, CDCl<sub>3</sub>) δ 7.57 – 7.46 (m, 1H), 7.25 – 7.08 (m, 6H), 7.01 (d, *J* = 7.2 Hz, 1H), 6.93 (t, *J* = 7.6 Hz, 2H), 6.57 (t, *J* = 7.3 Hz, 1H), 6.39 (t, *J* = 5.4 Hz, 2H), 4.26 (s, 1H), 2.00 (s,

3H), 1.99 (s, 3H).  $^{13}\text{C}$  NMR (126 MHz,  $\text{CDCl}_3$ )  $\delta$  146.7, 145.7, 143.1, 137.0, 133.1, 132.7, 128.9, 128.6, 128.3, 127.7, 127.7, 126.0, 118.0, 116.1, 63.2, 29.1, 22.5. HRMS (ESI)  $m/z$ :  $[\text{M}+\text{H}]^+$  calculated for  $\text{C}_{21}\text{H}_{21}\text{ClN}^+$  322.1358; Found 322.1362.

*N*-(1-(4-methoxyphenyl)-1-(*o*-tolyl)ethyl)aniline (**1i**)

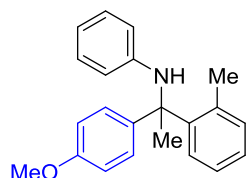

**1i** was prepared in 2.0 mmol scale of **S2** and obtained as a red solid (482 mg, 76% yield) with purified by flash neutral alumina (200-300 mesh) column chromatography.  $^1\text{H}$  NMR (500 MHz, Acetone)  $\delta$  7.65 (d,  $J = 7.8$  Hz, 1H), 7.24 (dd,  $J = 7.8, 3.8$  Hz, 3H), 7.19 (t,  $J = 7.4$  Hz, 1H), 7.07 (d,  $J = 7.4$  Hz, 1H), 6.91 (t,  $J = 7.7$  Hz, 2H), 6.88 – 6.82 (m, 2H), 6.57 (d,  $J = 8.1$  Hz, 2H), 6.51 (t,  $J = 7.3$  Hz, 1H), 5.28 (s, 1H), 3.76 (s, 3H), 2.10 (s, 3H), 2.05 (s, 3H).  $^{13}\text{C}$  NMR (126 MHz, Acetone)  $\delta$  159.3, 147.5, 144.6, 140.9, 138.0, 133.4, 129.1, 129.1, 128.1, 128.0, 126.5, 117.5, 116.2, 114.2, 63.4, 55.5, 30.1, 22.5. HRMS (ESI)  $m/z$ :  $[\text{M}+\text{H}]^+$  calculated for  $\text{C}_{22}\text{H}_{24}\text{NO}^+$  318.1853; Found 318.1851.

*N*-(1-([1,1'-biphenyl]-4-yl)-1-(*o*-tolyl)ethyl)aniline (**1j**)

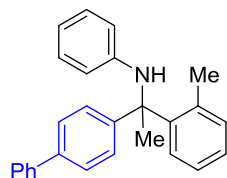

**1j** was prepared in 2.1 mmol scale of **S2** and obtained as a yellow solid (672 mg, 88% yield).  $^1\text{H}$  NMR (500 MHz,  $\text{CDCl}_3$ )  $\delta$  7.57 (dd,  $J = 7.8, 1.6$  Hz, 1H), 7.52 – 7.47 (m, 2H), 7.47 – 7.40 (m, 2H), 7.33 (t,  $J = 7.7$  Hz, 2H), 7.30 – 7.21 (m, 3H), 7.16 (dtd,  $J = 22.9, 7.4, 1.7$  Hz, 2H), 7.01 (dd,  $J = 7.4, 1.6$  Hz, 1H), 6.97 – 6.90 (m, 2H), 6.56 (t,  $J = 7.3$  Hz, 1H), 6.44 – 6.37 (m, 2H), 4.38 (s, 1H), 2.05 (s, 3H), 2.03 (s, 3H).  $^{13}\text{C}$  NMR (126 MHz,  $\text{CDCl}_3$ )  $\delta$  147.3, 145.9, 143.4, 140.6, 139.7, 137.2, 133.0, 128.9, 128.9, 128.4, 127.5, 127.4, 127.2, 127.1, 126.5, 125.9, 117.7, 115.8, 63.2, 29.2, 22.5. HRMS (ESI)  $m/z$ :  $[\text{M}+\text{H}]^+$  calculated for  $\text{C}_{27}\text{H}_{26}\text{N}^+$  364.2060; Found 364.2065.



*N*-(1-(3-methoxyphenyl)-1-(*o*-tolyl)ethyl)aniline (**1k**)

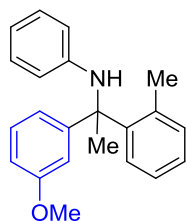

**1k** was prepared in 2.0 mmol scale of **S2** and obtained as a yellow solid (482 mg, 76% yield).  $^1\text{H}$  NMR (500 MHz,  $\text{CDCl}_3$ )  $\delta$  7.53 (dd,  $J = 7.8, 1.6$  Hz, 1H), 7.22 – 7.08 (m, 3H), 6.98 (dd,  $J = 7.4, 1.6$  Hz, 1H), 6.97 – 6.88 (m, 2H), 6.81 – 6.75 (m, 2H), 6.74 – 6.67 (m, 1H), 6.58 – 6.52 (m, 1H), 6.44 – 6.36 (m, 2H), 4.37 (s, 1H), 3.66 (s, 3H), 2.00 (s, 3H), 2.00 (s, 3H).  $^{13}\text{C}$  NMR (126 MHz,  $\text{CDCl}_3$ )  $\delta$  159.8, 150.3, 145.9, 143.3, 137.2, 132.9, 129.5, 128.8, 128.4, 127.5, 125.8, 118.4, 117.6, 115.7, 112.7, 111.5, 63.3, 55.3, 29.2, 22.4. HRMS (ESI)  $m/z$ :  $[\text{M}+\text{H}]^+$  calculated for  $\text{C}_{22}\text{H}_{24}\text{NO}^+$  318.1853; Found 318.1858.

*N*-(1-(naphthalen-2-yl)-1-(*o*-tolyl)ethyl)aniline (**1l**)

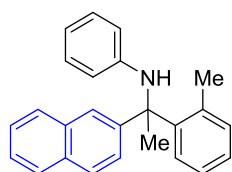

**1l** was prepared in 4.0 mmol scale of **S2** and obtained as yellow oil (170 mg) with the purification by flash column chromatography using neutral alumina (200-300 mesh).  $^1\text{H}$  NMR (500 MHz,  $\text{CDCl}_3$ )  $\delta$  7.76 – 7.65 (m, 4H), 7.59 (d,  $J = 7.7$  Hz, 1H), 7.40 – 7.34 (m, 2H), 7.31 (dd,  $J = 8.7, 2.0$  Hz, 1H), 7.24 – 7.12 (m, 2H), 7.01 (d,  $J = 7.3$  Hz, 1H), 6.94 (t,  $J = 7.7$  Hz, 2H), 6.57 (t,  $J = 7.4$  Hz, 1H), 6.45 (d,  $J = 8.0$  Hz, 2H), 4.47 (s, 1H), 2.10 (s, 3H), 2.01 (s, 3H).  $^{13}\text{C}$  NMR (126 MHz,  $\text{CDCl}_3$ )  $\delta$  146.0, 145.5, 143.4, 137.2, 133.2, 133.0, 132.4, 128.9, 128.5, 128.4, 127.6, 127.6, 126.3, 126.1, 125.9, 124.9, 124.5, 117.8, 116.1, 63.6, 29.1, 22.5. HRMS (ESI)  $m/z$ :  $[\text{M}+\text{H}]^+$  calculated for  $\text{C}_{25}\text{H}_{24}\text{N}^+$  338.1904 ; Found 338.1901.

*N*-(1-(benzo[*d*][1,3]dioxol-5-yl)-1-(*o*-tolyl)ethyl)aniline (**1m**)

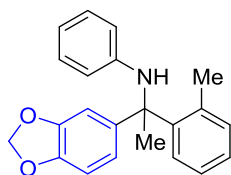

**1m** was prepared in 1.5 mmol scale of **S2** and obtained as a white solid (148 mg, 30% yield) with the purification by flash column chromatography using neutral alumina (200-300 mesh).  $^1\text{H}$  NMR (500 MHz, Acetone)  $\delta$  7.64 (dd,  $J = 7.8, 1.4$  Hz, 1H), 7.25 (td,  $J = 7.7, 1.6$  Hz, 1H), 7.19 (td,  $J = 7.4, 1.4$  Hz, 1H), 7.10–7.05 (m, 1H), 6.95–6.89 (m, 2H), 6.84 (d,  $J = 1.9$  Hz, 1H), 6.80 (dd,  $J = 8.2, 1.9$  Hz, 1H), 6.75 (d,  $J = 8.2$  Hz, 1H), 6.66–6.54 (m, 2H), 6.51 (tt,  $J = 7.3, 1.1$  Hz, 1H), 6.02–5.91 (m, 2H), 5.29 (s, 1H), 2.13 (s, 3H), 2.05 (s, 3H).  $^{13}\text{C}$  NMR (126 MHz, Acetone)  $\delta$  148.4, 147.2, 146.9, 144.4, 143.0, 137.8, 133.3, 129.0, 129.0, 127.9, 126.4, 120.0, 117.5, 116.1, 108.1, 107.7, 101.9, 63.6, 29.9, 22.4. HRMS (ESI)  $m/z$ :  $[\text{M}+\text{H}]^+$  calculated for  $\text{C}_{22}\text{H}_{22}\text{NO}_2^+$  332.1646; Found 332.1643.

The same general procedures from method B were used for the synthesis substrates

**1n-1u**:

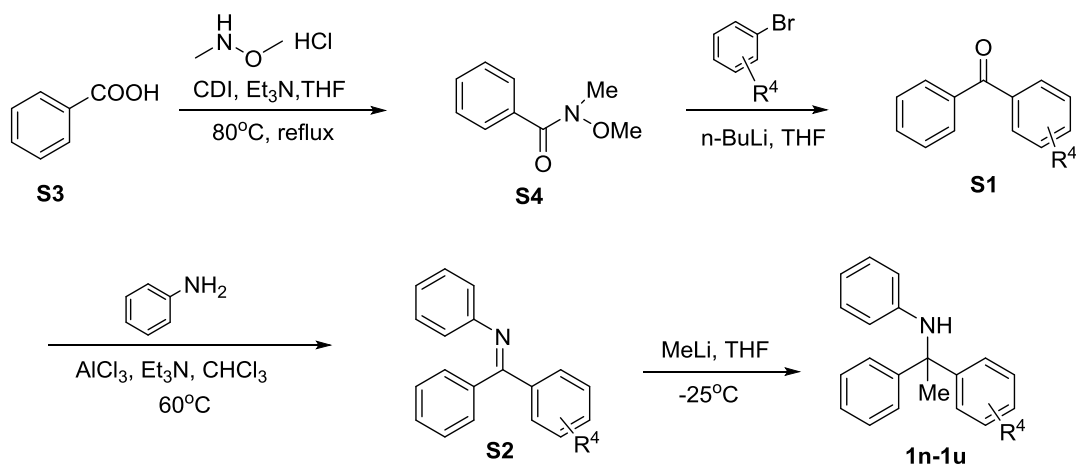

*N*-(1-(3-chloro-2-methylphenyl)-1-phenylethyl)aniline (**1n**)

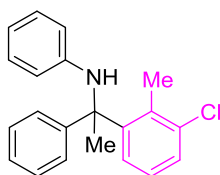

**1n** was prepared in 3.0 mmol scale of **S2** and obtained as a yellow solid (900 mg, 93% yield). <sup>1</sup>H NMR (500 MHz, CDCl<sub>3</sub>) δ 7.53 (dd, *J* = 8.0, 1.5 Hz, 1H), 7.28 (dd, *J* = 8.0, 1.4 Hz, 1H), 7.26 – 7.14 (m, 5H), 7.10 (t, *J* = 8.0 Hz, 1H), 6.97 – 6.90 (m, 2H), 6.58 (t, *J* = 7.3 Hz, 1H), 6.41 – 6.33 (m, 2H), 4.32 (s, 1H), 2.02 (s, 3H), 2.00 (s, 3H). <sup>13</sup>C NMR (126 MHz, CDCl<sub>3</sub>) δ 147.9, 145.8, 145.6, 137.1, 135.3, 128.9, 128.7, 127.2, 127.2, 126.3, 125.9, 118.1, 116.2, 63.8, 29.5, 18.8. HRMS (ESI) *m/z*: [M+H]<sup>+</sup> calculated for C<sub>21</sub>H<sub>21</sub>ClN<sup>+</sup> 322.1358; Found 322.1345.

*N*-(1-(2,4-dimethylphenyl)-1-phenylethyl)aniline (**1o**)

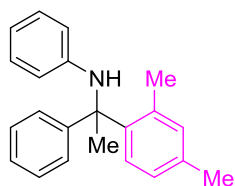

**1o** was prepared in 3.8 mmol scale of **S2** and obtained as yellow oil (873 mg, 76% yield). <sup>1</sup>H NMR (500 MHz, CDCl<sub>3</sub>) δ 7.41 (d, *J* = 8.0 Hz, 1H), 7.23 – 7.18 (m, 4H), 7.18 – 7.12 (m, 1H), 6.99 – 6.95 (m, 1H), 6.95 – 6.88 (m, 2H), 6.81 (d, *J* = 1.9 Hz, 1H), 6.55 (tt, *J* = 7.3, 1.1 Hz, 1H), 6.44 – 6.38 (m, 2H), 4.34 (s, 1H), 2.23 (s, 3H), 1.99 (s, 3H), 1.95 (s, 3H). <sup>13</sup>C NMR (126 MHz, CDCl<sub>3</sub>) δ 148.5, 146.0, 140.5, 136.9, 136.9, 133.8, 128.8, 128.5, 128.4, 126.9, 126.4, 126.1, 117.5, 115.8, 63.2, 29.2, 22.3, 20.9. HRMS (ESI) *m/z*: [M+H]<sup>+</sup> calculated for C<sub>22</sub>H<sub>24</sub>N<sup>+</sup> 302.1904; Found 302.1901.

*N*-(1-(4-chloro-2-methylphenyl)-1-phenylethyl)aniline (**1p**)

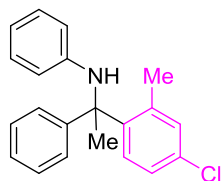

**1p** was prepared in 2.0mmol scale of **S2** and obtained as yellow oil (208 mg, 32% yield). <sup>1</sup>H NMR (500 MHz, CDCl<sub>3</sub>) δ 7.50 (d, *J* = 8.5 Hz, 1H), 7.23 (t, *J* = 7.6 Hz, 2H), 7.19 – 7.12 (m, 4H), 6.99 (s, 1H), 6.94 (t, *J* = 7.7 Hz, 2H), 6.58 (t, *J* = 7.3 Hz, 1H), 6.38 (d, *J* = 7.9 Hz, 2H), 4.30 (s, 1H), 1.98 (s, 3H), 1.94 (s, 3H). <sup>13</sup>C NMR (126 MHz, CDCl<sub>3</sub>) δ 147.8, 145.6, 142.1, 139.3, 132.9, 132.6, 129.9, 128.9, 128.7, 127.2, 125.8, 125.8, 118.0, 115.9, 63.1, 29.2, 22.3. HRMS (ESI) *m/z*: [M+H]<sup>+</sup> calculated for C<sub>21</sub>H<sub>21</sub>ClN<sup>+</sup> 322.1358; Found 322.1348.

*N*-(1-(4-methoxy-2-methylphenyl)-1-phenylethyl)aniline (**1q**)

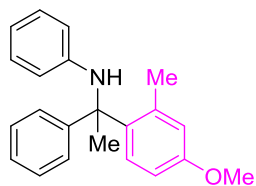

**1q** was prepared in 2.0 mmol scale of **S2** and obtained as a yellow solid (438 mg, 69% yield).  $^1\text{H}$  NMR (400 MHz,  $\text{CDCl}_3$ )  $\delta$  7.51 (d,  $J = 8.7$  Hz, 1H), 7.29 (d,  $J = 4.3$  Hz, 4H), 7.23 (q,  $J = 4.7$  Hz, 1H), 7.05 – 6.97 (m, 2H), 6.77 (dd,  $J = 8.7, 2.8$  Hz, 1H), 6.69 – 6.58 (m, 2H), 6.56 – 6.42 (m, 2H), 4.42 (s, 1H), 3.80 (s, 3H), 2.06 (s, 3H), 2.04 (s, 3H).  $^{13}\text{C}$  NMR (101 MHz,  $\text{CDCl}_3$ )  $\delta$  158.6, 148.7, 146.0, 138.8, 135.7, 129.5, 128.8, 128.5, 126.9, 126.0, 118.5, 117.6, 115.8, 110.3, 63.0, 55.2, 29.5, 22.6. HRMS (ESI)  $m/z$ :  $[\text{M}+\text{H}]^+$  calculated for  $\text{C}_{22}\text{H}_{24}\text{NO}^+$  318.1853; Found 318.1838.

*N*-(1-(2,5-dimethylphenyl)-1-phenylethyl)aniline (**1r**)

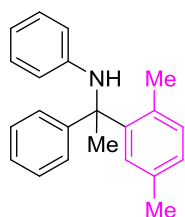

**1r** was prepared in 2.0 mmol scale of **S2** and obtained as a white solid (437 mg, 72% yield).  $^1\text{H}$  NMR (500 MHz,  $\text{CDCl}_3$ )  $\delta$  7.36 (s, 1H), 7.21 (dt,  $J = 4.7, 1.5$  Hz, 4H), 7.18 – 7.13 (m, 1H), 6.96 – 6.90 (m, 3H), 6.88 (d,  $J = 7.8$  Hz, 1H), 6.55 (t,  $J = 7.4$  Hz, 1H), 6.43 – 6.38 (m, 2H), 4.34 (s, 1H), 2.30 (s, 3H), 2.00 (s, 3H), 1.93 (s, 3H).  $^{13}\text{C}$  NMR (126 MHz,  $\text{CDCl}_3$ )  $\delta$  148.4, 146.0, 143.2, 135.1, 134.0, 132.8, 129.1, 128.8, 128.5, 128.0, 126.9, 126.1, 117.6, 115.8, 63.3, 29.2, 22.0, 21.6. HRMS (ESI)  $m/z$ :  $[\text{M}+\text{H}]^+$  calculated for  $\text{C}_{22}\text{H}_{24}\text{N}^+$  302.1904; Found 302.1897.

*N*-(1-(5-methoxy-2-methylphenyl)-1-phenylethyl)aniline (**1s**)

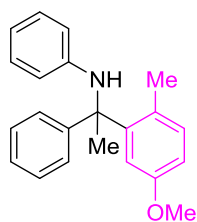

**1s** was prepared in 2.5 mmol scale of **S2** and obtained as a yellow solid (439 mg, 55% yield).

$^1\text{H}$  NMR (500 MHz,  $\text{CDCl}_3$ )  $\delta$  7.29 (d,  $J = 4.3$  Hz, 4H), 7.23 (dd,  $J = 5.7, 2.6$  Hz, 2H), 7.05 – 6.94 (m, 3H), 6.74 (dd,  $J = 8.3, 2.7$  Hz, 1H), 6.63 (t,  $J = 7.3$  Hz, 1H), 6.50 (d,  $J = 7.8$  Hz, 2H), 4.43 (s, 1H), 3.80 (s, 3H), 2.07 (s, 3H), 1.97 (s, 3H).  $^{13}\text{C}$  NMR (126 MHz,  $\text{CDCl}_3$ )  $\delta$  157.7, 148.1, 145.9, 144.8, 133.6, 129.1, 128.8, 128.6, 127.0, 126.0, 117.7, 115.8, 115.6, 111.3, 63.3, 55.4, 29.1, 21.5. HRMS (ESI)  $m/z$ :  $[\text{M}+\text{H}]^+$  calculated for  $\text{C}_{22}\text{H}_{24}\text{NO}^+$  318.1853; Found 318.1841.

*N*-(1-(2-ethylphenyl)-1-phenylethyl)aniline (**1t**)

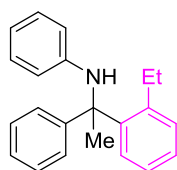

**1t** was prepared in 3.0 mmol scale of **S2** and obtained as yellow oil (790 mg, 87% yield).  $^1\text{H}$  NMR (400 MHz,  $\text{CDCl}_3$ )  $\delta$  7.59 (dt,  $J = 7.7, 1.6$  Hz, 1H), 7.30 (dt,  $J = 5.6, 2.7$  Hz, 5H), 7.25 – 7.18 (m, 3H), 7.02 (ddd,  $J = 8.7, 7.3, 1.4$  Hz, 2H), 6.64 (td,  $J = 7.3, 1.3$  Hz, 1H), 6.52 – 6.44 (m, 2H), 4.40 (s, 1H), 2.49 (dddd,  $J = 12.8, 7.4, 4.6, 1.4$  Hz, 2H), 2.08 (d,  $J = 1.4$  Hz, 3H), 0.87 (td,  $J = 7.5, 1.4$  Hz, 3H).  $^{13}\text{C}$  NMR (101 MHz,  $\text{CDCl}_3$ )  $\delta$  148.7, 146.2, 143.4, 143.3, 130.9, 128.8, 128.5, 128.1, 127.6, 126.8, 126.3, 125.5, 117.8, 116.3, 63.4, 29.3, 26.7, 15.1. HRMS (ESI)  $m/z$ :  $[\text{M}+\text{H}]^+$  calculated for  $\text{C}_{22}\text{H}_{24}\text{N}^+$  302.1904; Found 302.1890.

*N*-(1-(naphthalen-1-yl)-1-phenylethyl)aniline (**1u**)

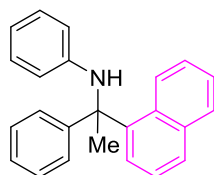

**1u** was prepared in 2 mmol scale of **S2** and obtained as yellow oil (512 mg, 79% yield). <sup>1</sup>H NMR (500 MHz, CDCl<sub>3</sub>) δ 8.12 (d, *J* = 8.8 Hz, 1H), 7.84 – 7.77 (m, 2H), 7.71 – 7.67 (m, 1H), 7.46 – 7.38 (m, 3H), 7.38 – 7.32 (m, 1H), 7.28 (dd, *J* = 8.4, 6.8 Hz, 2H), 7.22 (qd, *J* = 7.9, 3.5 Hz, 2H), 7.03 – 6.95 (m, 2H), 6.64 (t, *J* = 7.3 Hz, 1H), 6.48 (d, *J* = 8.0 Hz, 2H), 4.57 (s, 1H), 2.24 (s, 3H). <sup>13</sup>C NMR (126 MHz, CDCl<sub>3</sub>) δ 147.9, 146.0, 141.9, 135.1, 131.0, 129.2, 129.0, 128.7, 128.6, 127.4, 126.9, 126.9, 126.4, 125.3, 125.2, 125.0, 118.3, 117.2, 64.1, 29.1. HRMS (ESI) *m/z*: [M+H]<sup>+</sup> calculated for C<sub>24</sub>H<sub>22</sub>N<sup>+</sup> 324.1747; Found 324.1736.

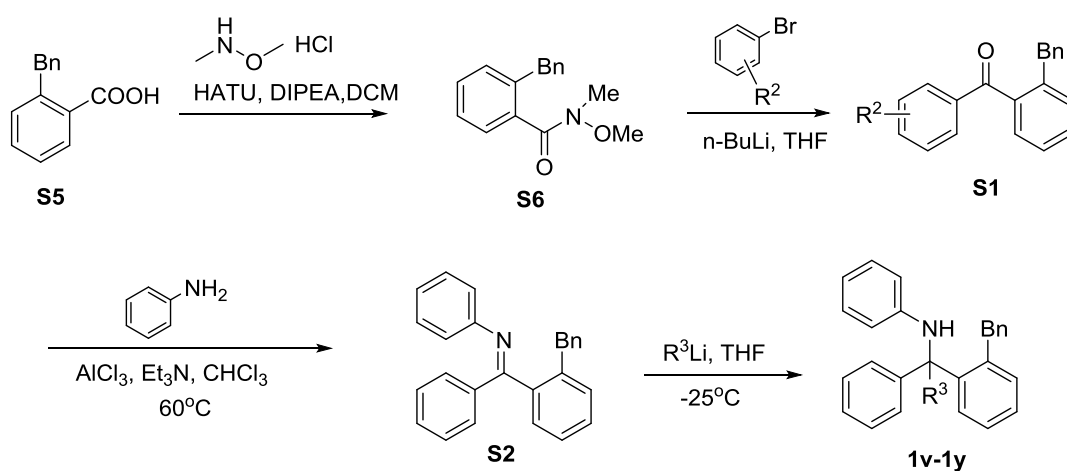

#### General Procedure of method C for the synthesis of substrate 1v-1y:

To a solution of 2-benzylbenzoic acid (2.12 g, 10 mmol, 1.0 eq) and N,O-dimethylhydroxylamine hydrochloride (1.94 g, 20 mmol, 2.0 eq) in DCM (50 mL) was added HATU (4.56 g, 12 mmol, 1.2 eq) and DIPEA (6.8 mL, 40 mmol, 4.0 eq) at rt. After stirring overnight, a saturated aqueous solution of sodium hydrogencarbonate was added to the reaction mixture, and the mixture was stirred for 30 minutes. The mixture was then extracted with DCM for three times, and the combined organic layer was washed with brine, dried over anhydrous Na<sub>2</sub>SO<sub>4</sub>, filtered and concentrated under vacuum to give a residue, which was purified by flash column chromatography on silica gel (petroleum ether/EtOAc = 6:1) to give **S6** (2.6g, 93% yield) as colorless oil.

The same general procedures from **method B** were used for the synthesis substrates **S2** starting from **S6**.

Under N<sub>2</sub> atmosphere, R<sup>3</sup>Li (6.0 mmol, 2.0 eq) was added dropwisely into a solution of **S2** (3.0 mmol, 1.0 eq) in THF (20 mL) at -78 °C. After completion of the addition, the mixture was

stirring for 3 hours at this temperature. Then the reaction was quenched with saturated aqueous solution of  $\text{NH}_4\text{Cl}$ , and the mixture was extracted with EtOAc for 3 times. The combined organic layers were dried over  $\text{Na}_2\text{SO}_4$ , filtered and concentrated under vacuum at room temperature to give a residue, which was purified by column chromatography on neutral alumina (200-300 mesh) (petroleum:EtOAc, 200:1) to give the product **1** (**1v-1y**).

*N*-(1-(2-benzylphenyl)-1-phenylethyl)aniline (**1v**)

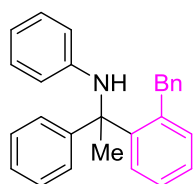

**1v** was prepared in 2.0 mmol scale of **S2** and obtained as red oil (375 mg, 52% yield).  $^1\text{H}$  NMR (500 MHz, Acetone)  $\delta$  7.75 (dd,  $J = 7.9, 1.4$  Hz, 1H), 7.48 – 7.43 (m, 2H), 7.35 (dd,  $J = 8.5, 7.0$  Hz, 2H), 7.31 – 7.23 (m, 2H), 7.18 (td,  $J = 7.5, 1.4$  Hz, 1H), 7.10 (qd,  $J = 7.7, 3.7$  Hz, 3H), 6.97 – 6.92 (m, 2H), 6.85 (dd,  $J = 7.6, 1.7$  Hz, 1H), 6.78 – 6.72 (m, 2H), 6.64 – 6.59 (m, 2H), 6.57 (td,  $J = 7.2, 1.2$  Hz, 1H), 5.44 (s, 1H), 3.99 (d,  $J = 16.2$  Hz, 1H), 3.86 (d,  $J = 16.1$  Hz, 1H), 2.10 (s, 3H).  $^{13}\text{C}$  NMR (126 MHz, Acetone)  $\delta$  149.2, 147.4, 144.6, 142.4, 141.5, 132.7, 130.2, 129.2, 129.1, 129.1, 128.9, 128.0, 127.5, 127.0, 126.6, 126.4, 117.9, 116.7, 63.9, 39.9, 30.5. HRMS (ESI)  $m/z$ :  $[\text{M}+\text{H}]^+$  calculated for  $\text{C}_{27}\text{H}_{26}\text{N}^+$  364.2060; Found 364.2056.

*N*-(1-phenyl-1-(*o*-tolyl)propyl)aniline (**1w**)

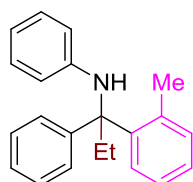

**1w** was prepared in 3 mmol scale of **S2** and obtained as a yellow solid (130 mg).  $^1\text{H}$  NMR (400 MHz,  $\text{CDCl}_3$ )  $\delta$  7.78 (dd,  $J = 7.9, 1.3$  Hz, 1H), 7.32 – 7.22 (m, 5H), 7.19 (qd,  $J = 6.9, 1.7$  Hz, 2H), 7.05 – 6.91 (m, 3H), 6.62 (tt,  $J = 7.3, 1.1$  Hz, 1H), 6.51 – 6.39 (m, 2H), 4.59 (s, 1H), 2.78 (dq,  $J = 14.4, 7.3$  Hz, 1H), 2.30 (dq,  $J = 14.2, 7.2$  Hz, 1H), 2.02 (s, 3H), 0.71 (t,  $J = 7.2$  Hz, 3H).  $^{13}\text{C}$  NMR (101 MHz,  $\text{CDCl}_3$ )  $\delta$  145.9, 145.3, 143.9, 137.8, 133.0, 128.8, 128.1, 127.6, 127.3,

126.4, 126.3, 125.7, 117.9, 115.9, 65.4, 31.6, 22.1, 8.2. HRMS (ESI)  $m/z$ :  $[M+H]^+$  calculated for  $C_{22}H_{24}N^+$  302.1904; Found 302.1894.

*N*-(1-(2-benzylphenyl)-1-phenylpropyl)aniline (**1x**)

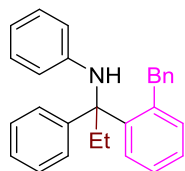

**1x** was prepared in 4.0 mmol scale of **S2** and obtained as a yellow solid (90 mg).  $^1H$  NMR (400 MHz, Acetone)  $\delta$  7.93 (dd,  $J = 8.0, 1.3$  Hz, 1H), 7.51 – 7.43 (m, 2H), 7.36 – 7.28 (m, 3H), 7.26 – 7.18 (m, 1H), 7.16 (td,  $J = 7.5, 1.3$  Hz, 2H), 7.05 (dd,  $J = 5.1, 1.9$  Hz, 3H), 6.97 – 6.88 (m, 2H), 6.80 – 6.74 (m, 1H), 6.67 – 6.52 (m, 5H), 5.52 (s, 1H), 4.02 (d,  $J = 16.1$  Hz, 1H), 3.82 (d,  $J = 16.1$  Hz, 1H), 2.87 (dq,  $J = 14.7, 7.4$  Hz, 1H), 2.38 (dq,  $J = 14.2, 7.2$  Hz, 1H), 0.71 (t,  $J = 7.2$  Hz, 3H).  $^{13}C$  NMR (101 MHz, Acetone)  $\delta$  146.5, 145.7, 144.4, 141.9, 141.3, 131.9, 129.5, 128.5, 128.0, 127.9, 127.5, 127.0, 126.6, 126.3, 125.7, 125.5, 117.4, 115.9, 65.2, 38.5, 31.5, 7.5. HRMS (ESI)  $m/z$ :  $[M+H]^+$  calculated for  $C_{28}H_{28}N^+$  378.2217; Found 378.2204.

*N*-(1-(2-benzylphenyl)-1-phenylpentyl)aniline (**1y**)

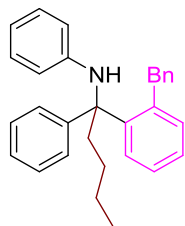

**1y** was prepared in 4.0 mmol scale of **S2** and obtained as yellow oil (203 mg, 13% yield).  $^1H$  NMR (400 MHz, Acetone)  $\delta$  7.93 (dd,  $J = 8.0, 1.3$  Hz, 1H), 7.49 (dd,  $J = 7.5, 1.7$  Hz, 2H), 7.35 – 7.29 (m, 3H), 7.23 (d,  $J = 7.3$  Hz, 1H), 7.15 (dd,  $J = 7.5, 1.3$  Hz, 1H), 7.05 (dd,  $J = 5.1, 2.0$  Hz, 2H), 6.95 – 6.89 (m, 2H), 6.80 (dd,  $J = 7.8, 1.5$  Hz, 1H), 6.66 – 6.59 (m, 4H), 6.56 (td,  $J = 7.3, 1.2$  Hz, 1H), 5.52 (s, 1H), 4.02 (d,  $J = 16.1$  Hz, 1H), 3.83 (d,  $J = 16.1$  Hz, 1H), 2.82 – 2.75 (m, 1H), 2.37 (ddd,  $J = 13.2, 11.7, 4.1$  Hz, 1H), 1.33 – 1.26 (m, 1H), 1.17 (qd,  $J = 7.0, 1.6$  Hz, 2H), 1.06 – 0.93 (m, 1H), 0.72 (t,  $J = 7.2$  Hz, 3H).  $^{13}C$  NMR (101 MHz, Acetone)  $\delta$  147.3, 146.8, 145.1, 142.6, 141.9, 132.8, 130.2, 129.2, 128.8, 128.7, 128.5, 127.8, 127.4, 127.0, 126.5, 126.3,



118.1, 116.8, 65.9, 39.9, 39.4, 26.5, 23.4, 14.3. HRMS (ESI)  $m/z$ :  $[M+H]^+$  calculated for  $C_{30}H_{32}N^+$  406.2530; Found 406.2516.

### Kinetic resolution of $\alpha$ -tertiary amines **1**

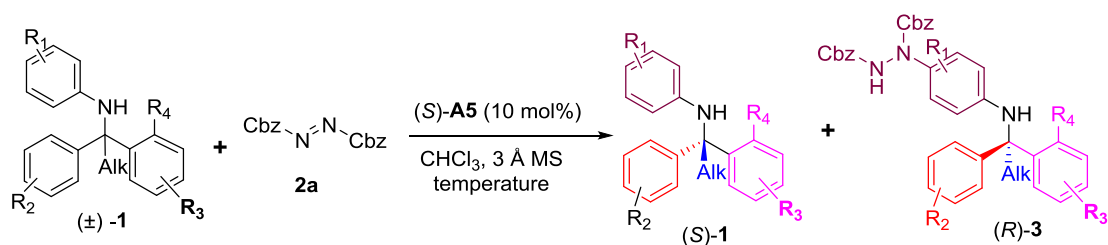

**General procedure for kinetic resolution of  $\alpha$ -tertiary amines **1**:** To a mixture of racemic **1** (0.2 mmol, 1.0 eq), dibenzyl azodicarboxylates **2a** (0.2 mmol, 1.0 eq), CPA  $(S)$ -**A5** (0.02 mmol, 10 mol%) and activated 3 Å MS (120 mg) was added anhydrous  $CHCl_3$  (2 mL), which was precooled to the designated temperature. The reaction was allowed to stir at that temperature until achieving appropriate conversion as indicated by HPLC analysis of the reaction mixture. After adding several drops of  $Et_3N$  to quench the reaction, the mixture was concentrated under vacuum at 20 °C to give a residue, which was purified by column chromatography on silica gel or neutral alumina (200-300 mesh) to give the recovered SM  $(S)$ -**1** and product **3**.

The reaction of **1a** was performed on 0.2 mmol scale for 23 h at -30 °C, which was purified by column chromatography on silica gel (petroleum:EtOAc, 100:1 to 5:1) to give the recovered SM  $(S)$ -**1a** (25.4 mg, 44% yield) as a white solid and product **3a** (55.3 mg, 47% yield) as a yellow solid.

$(S)$ -*N*-(1-phenyl-1-(*o*-tolyl)ethyl)aniline ( $(S)$ -**1a**)

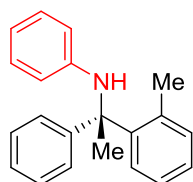

HPLC: Chiralpak IB column, 99:1 hexanes/isopropanol, 1 mL/min,  $t_R$  = 5.0 min (major), 6.3 min (minor), 94:6 er.  $[\alpha]_D^{25} = +8.56$  (c 1.0,  $CH_2Cl_2$ ); m.p. 85-91 °C. IR ( $cm^{-1}$ ):  $f = 3427, 2979, 1598, 1493, 746, 730, 701, 691$ .

Dibenzyl-(*R*)-1-(4-((1-phenyl-1-(*o*-tolyl)ethyl)amino)phenyl)hydrazine-1,2-dicarboxylate

(**3a**)

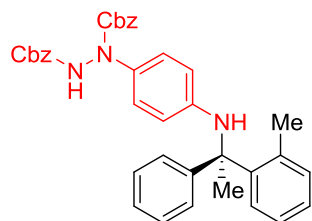

$^1\text{H}$  NMR (500 MHz,  $\text{CDCl}_3$ )  $\delta$  7.52 (d,  $J = 7.6$  Hz, 1H), 7.26 – 6.71 (m, 21H), 6.32 (d,  $J = 8.4$  Hz, 2H), 5.06 (d,  $J = 14.8$  Hz, 4H), 4.47 (s, 1H), 2.00 (s, 3H), 1.97 (s, 3H).  $^{13}\text{C}$  NMR (126 MHz,  $\text{CDCl}_3$ )  $\delta$  156.2, 155.6, 148.0, 145.1, 143.0, 137.2, 136.1, 135.7, 133.0, 131.6, 128.7, 128.6, 128.5, 128.4, 128.3, 128.1, 127.6, 127.0, 125.9, 115.3, 68.2, 67.9, 63.4, 29.1, 22.4. HRMS (ESI)  $m/z$ :  $[\text{M}-\text{H}]^-$  calculated for  $\text{C}_{37}\text{H}_{34}\text{N}_3\text{O}_4^-$  584.2554; Found 584.2567. HPLC: Chiralpak IB column, 80:20 hexanes/ isopropanol, 1 mL/min,  $t_{\text{R}} = 25.8$  min (major), 28.2 min (minor), 95:5 er.  $[\alpha]_{\text{D}}^{25} = -3.04$  (c 1.0,  $\text{CH}_2\text{Cl}_2$ ); m.p. 70-75 °C. IR ( $\text{cm}^{-1}$ ):  $\nu = 3364, 3290, 3031, 2852, 1715, 1609, 1513, 1489, 1219, 754, 730, 696$ .

The reaction of **1b** was performed on 0.2 mmol scale for 22 h at -30 °C, which was purified by column chromatography on silica gel (petroleum:EtOAc, 100:1 to 5:1) to give the recovered SM (*S*)-**1b** (27.6 mg, 46% yield) as green oil and product **3b** (59.6 mg, 50% yield) as a yellow solid.

(*S*)-3-methyl-N-(1-phenyl-1-(*o*-tolyl)ethyl)aniline ((*S*)-**1b**)

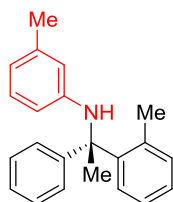

HPLC: Chiralpak IB column, 99:1 hexanes/ isopropanol, 1 mL/min,  $t_{\text{R}} = 4.6$  min (major), 5.2 min (minor), 98:2 er.  $[\alpha]_{\text{D}}^{25} = +14.12$  (c 1.0,  $\text{CH}_2\text{Cl}_2$ ).

Dibenzyl(*R*)-1-(2-methyl-4-((1-phenyl-1-(*o*-tolyl)ethyl)amino)phenyl)hydrazine-1,2-dicarboxylate (**3b**)

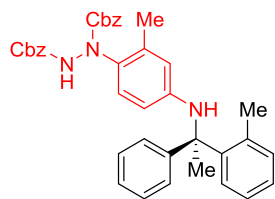

$^1\text{H}$  NMR (500 MHz,  $\text{CDCl}_3$ )  $\delta$  7.60 (d,  $J = 7.6$  Hz, 1H), 7.35 – 7.03 (m, 19H), 6.26 (d,  $J = 20.4$  Hz, 2H), 5.10 (t,  $J = 8.4$  Hz, 4H), 4.52 (s, 1H), 2.07 (s, 3H), 2.04 (s, 3H), 1.98 (s, 3H).  $^{13}\text{C}$  NMR (126 MHz,  $\text{CDCl}_3$ )  $\delta$  156.2, 155.2, 148.1, 145.9, 143.1, 139.6, 137.2, 136.2, 135.9, 135.7, 132.9, 130.7, 130.3, 128.6, 128.4, 128.4, 128.3, 128.0, 127.5, 127.5, 127.3, 127.0, 126.3, 125.9, 116.8, 113.1, 68.1, 67.8, 63.3, 29.1, 22.4, 17.9. HRMS (ESI)  $m/z$ :  $[\text{M}-\text{H}]^-$  calculated for  $\text{C}_{38}\text{H}_{36}\text{N}_3\text{O}_4^-$  598.2711; Found 598.2695. HPLC: Chiralpak IB column, 80:20 hexanes/ isopropanol, 1 mL/min,  $t_{\text{R}} = 16.9$  min (minor), 20.1 min (major), 8:92 er.  $[\alpha]_{\text{D}}^{25} = +0.58$  (c 1.0,  $\text{CH}_2\text{Cl}_2$ ); m.p. 80-87  $^\circ\text{C}$ .

The reaction of **1c** was performed on 0.2 mmol scale for 21 h at  $-60$   $^\circ\text{C}$ , which was purified by column chromatography on silica gel (petroleum:EtOAc, 100:1 to 5:1) to give the recovered SM (*S*)-**1c** (25.7 mg, 40% yield) as red oil and product **3c** (66.5 mg, 54% yield) as a white solid.

(*S*)-3-methoxy-*N*-(1-phenyl-1-(*o*-tolyl)ethyl)aniline ((*S*)-**1c**)

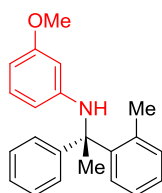

HPLC: Chiralpak IA column, 99:1 hexanes/ isopropanol, 1 mL/min,  $t_{\text{R}} = 6.3$  min (major), 6.7 min (minor), 96.5:3.5 er.  $[\alpha]_{\text{D}}^{25} = -2.42$  (c 1.0,  $\text{CH}_2\text{Cl}_2$ ).

Dibenzyl-(*R*)-1-(2-methoxy-4-((1-phenyl-1-(*o*-tolyl)ethyl)amino)phenyl)hydrazine-1,2-dicarbonylate (**3c**)

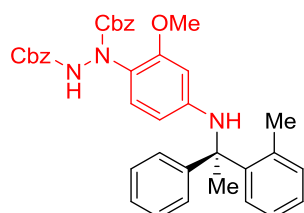

$^1\text{H}$  NMR (500 MHz,  $\text{CDCl}_3$ )  $\delta$  7.62 (d,  $J = 7.6$  Hz, 1H), 7.48 – 6.76 (m, 20H), 6.28 – 5.63 (m, 2H), 5.26 – 5.00 (m, 4H), 4.66 (s, 1H), 3.38 (d,  $J = 40.9$  Hz, 3H), 2.08 (s, 3H), 2.05 (s, 3H).  $^{13}\text{C}$  NMR (126 MHz,  $\text{CDCl}_3$ )  $\delta$  156.7, 155.9, 155.0, 154.9, 147.8, 147.2, 142.8, 137.6, 136.5, 135.8, 133.1, 129.9, 129.4, 128.6, 128.6, 128.3, 128.1, 127.8, 127.8, 127.7, 127.2, 127.1, 125.9, 125.7, 120.0, 119.5, 107.6, 107.3, 98.2, 98.1, 68.1, 67.8, 67.6, 63.3, 55.2, 55.0, 29.7, 22.3. HRMS (ESI)  $m/z$ :  $[\text{M}-\text{H}]^-$  calculated for  $\text{C}_{38}\text{H}_{36}\text{N}_3\text{O}_5^-$  614.2660; Found 614.2654. HPLC: Chiralpak IB column, 80:20 hexanes/ isopropanol, 1 mL/min,  $t_{\text{R}} = 16.7$  min (minor), 19.5 min (major), 13.5:86.5 er.  $[\alpha]_{\text{D}}^{25} = -1.46$  (c 1.0,  $\text{CH}_2\text{Cl}_2$ ); m.p. 75-82  $^\circ\text{C}$ .

The reaction of **1d** was performed on 0.2 mmol scale for 60 h at -10  $^\circ\text{C}$ , which was purified by column chromatography on silica gel (petroleum:EtOAc, 100:1 to 5:1) to give the recovered SM (*S*)-**1d** (30.5 mg, 48% yield) as a yellow solid and product **3d** (59.8 mg, 48% yield) as a white solid.

(*S*)-3-chloro-*N*-(1-phenyl-1-(*o*-tolyl)ethyl)aniline ((*S*)-**1d**)

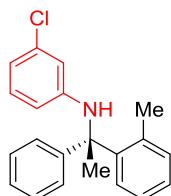

HPLC: Chiralpak IB column, 99:1 hexanes/ isopropanol, 1 mL/min,  $t_{\text{R}} = 6.0$  min (major), 9.5 min (minor), 93:7 er.  $[\alpha]_{\text{D}}^{25} = +16.92$  (c 1.0,  $\text{CH}_2\text{Cl}_2$ ); m.p. 57-63  $^\circ\text{C}$ .

Dibenzyl-(*R*)-1-(2-chloro-4-((1-phenyl-1-(*o*-tolyl)ethyl)amino)phenyl)hydrazine-1,2-dicarboxylate (**3d**)

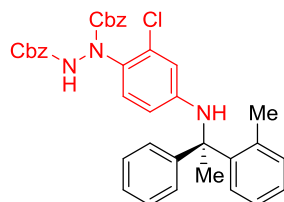

$^1\text{H}$  NMR (500 MHz,  $\text{CDCl}_3$ )  $\delta$  7.56 (t,  $J = 5.7$  Hz, 1H), 7.42 – 6.80 (m, 19H), 6.47 (d,  $J = 2.8$  Hz, 1H), 6.41 – 6.12 (m, 1H), 5.33 – 5.01 (m, 4H), 4.73 (s, 1H), 2.07 (s, 3H), 2.02 (s, 3H).  $^{13}\text{C}$  NMR (126 MHz,  $\text{CDCl}_3$ )  $\delta$  156.0, 155.8, 155.5, 155.2, 147.5, 146.9, 142.2, 142.2, 137.1, 136.0, 135.9, 135.6, 133.1, 133.1, 132.4, 130.8, 130.7, 130.2, 128.7, 128.6, 128.6, 128.5, 128.4, 128.3, 128.2,

128.0, 127.9, 127.8, 127.3, 127.3, 126.1, 125.7, 114.8, 113.9, 68.4, 68.2, 67.9, 67.8, 63.4, 63.4, 29.8, 29.1, 29.0, 22.4. HRMS (ESI)  $m/z$ :  $[M-H]^-$  calculated for  $C_{37}H_{33}ClN_3O_4^-$  618.2165; Found 618.2195. HPLC: Chiralpak IB column, 80:20 hexanes/ isopropanol, 1 mL/min,  $t_R$  = 18.4 min (minor), 21.4 min (major), 7.5:92.5 er.  $[\alpha]_D^{25} = -3.24$  (c 1.0,  $CH_2Cl_2$ ); m.p. 72-77 °C.

The reaction of **1e** was performed on 0.2 mmol scale for 120 h at -20 °C, which was purified by column chromatography on silica gel (petroleum:EtOAc, 100:1 to 5:1) to give the recovered SM (*S*)-**1e** (28 mg, 46% yield) as a white solid and product **3e** (53.3 mg, 44% yield) as a yellow solid.

(*S*)-3-fluoro-*N*-(1-phenyl-1-(*o*-tolyl)ethyl)aniline ((*S*)-**1e**)

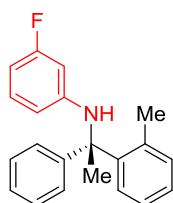

HPLC: Chiralpak IB column, 99:1 hexanes/ isopropanol, 1 mL/min,  $t_R$  = 5.7 min (major), 7.9 min (minor), 97.5:2.5 er.  $[\alpha]_D^{25} = +7.36$  (c 1.0,  $CH_2Cl_2$ ); m.p. 80-87 °C.

Dibenzyl-(*R*)-1-(2-fluoro-4-((1-phenyl-1-(*o*-tolyl)ethyl)amino)phenyl)hydrazine-1,2-dicarboxylate (**3e**)

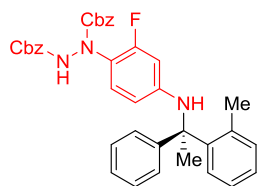

$^1H$  NMR (500 MHz,  $CDCl_3$ )  $\delta$  7.56 (d,  $J = 7.6$  Hz, 1H), 7.41 – 6.77 (m, 19H), 6.22 (s, 1H), 6.11 (d,  $J = 13.0$  Hz, 1H), 5.31 – 5.00 (m, 4H), 4.74 (s, 1H), 2.06 (s, 3H), 2.02 (s, 3H).  $^{13}C$  NMR (126 MHz,  $CDCl_3$ )  $\delta$  158.0 (d,  $J = 246.8$  Hz), 156.1, 155.7, 147.5, 147.3, 142.2, 137.1, 135.9, 135.6, 133.1, 129.7, 128.7, 128.6, 128.4, 128.2, 128.0, 127.8, 127.3, 127.2, 126.1, 125.7, 118.2, 110.9, 101.5 (d,  $J = 24.4$  Hz), 68.3, 67.8, 63.4, 29.1, 22.4.  $^{19}F$  NMR (471 MHz,  $CDCl_3$ )  $\delta$  -120.8, -121.3, -121.5. HRMS (ESI)  $m/z$ :  $[M-H]^-$  calculated for  $C_{37}H_{33}FN_3O_4^-$  602.2460; Found 602.2506. HPLC: Chiralpak IB column, 80:20 hexanes/ isopropanol, 1 mL/min,  $t_R$  = 18.8 min (minor), 22.1 min (major), 10.5:89.5 er.  $[\alpha]_D^{25} = -4.48$  (c 1.0,  $CH_2Cl_2$ ); m.p. 74-80 °C.

The reaction of **1f** was performed on 0.2 mmol scale for 130 h at -60 °C, which was purified by column chromatography on silica gel (petroleum:EtOAc, 100:1 to 5:1) to give the recovered SM (*S*)-**1f** (30.7 mg, 49% yield) as green oil and product **3f** (57.9 mg, 47% yield) as a yellow solid.

(*S*)-3,5-dimethyl-*N*-(1-phenyl-1-(*o*-tolyl)ethyl)aniline ((*S*)-**1f**)

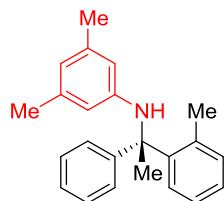

HPLC: Chiralpak IB N-5 column, 100:0 hexanes/ isopropanol, 1 mL/min,  $t_R = 7.6$  min (minor), 8.3 min (major), 11.5:88.5 er.  $[\alpha]_D^{25} = -4.72$  (c 1.0, CH<sub>2</sub>Cl<sub>2</sub>).

Dibenzyl-(*R*)-1-(2,6-dimethyl-4-((1-phenyl-1-(*o*-tolyl)ethyl)amino)phenyl)hydrazine-1,2-dicarboxylate (**3f**)

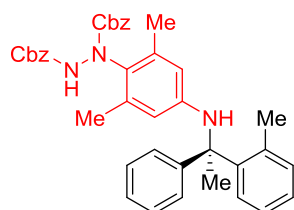

<sup>1</sup>H NMR (500 MHz, CDCl<sub>3</sub>)  $\delta$  7.61 (t,  $J = 6.6$  Hz, 1H), 7.37 – 7.19 (m, 15H), 7.14 (dd,  $J = 6.6$ , 2.9 Hz, 1H), 7.08 (d,  $J = 6.7$  Hz, 1H), 6.86 (d,  $J = 27.7$  Hz, 1H), 6.14 (d,  $J = 6.2$  Hz, 2H), 5.24 – 5.06 (m, 4H), 4.48 (s, 1H), 2.06 (d,  $J = 21.1$  Hz, 12H). <sup>13</sup>C NMR (126 MHz, CDCl<sub>3</sub>)  $\delta$  156.5, 156.0, 155.0, 148.2, 145.7, 143.2, 137.2, 136.6, 136.2, 135.7, 133.0, 132.9, 129.2, 129.0, 128.6, 128.6, 128.5, 128.5, 128.4, 128.3, 128.1, 128.0, 127.6, 127.5, 127.5, 127.0, 127.0, 125.9, 125.9, 125.8, 115.0, 114.9, 68.3, 68.2, 67.8, 63.3, 63.2, 29.2, 29.0, 22.4, 18.6, 18.5. HRMS (ESI)  $m/z$ : [M-H]<sup>-</sup> calculated for C<sub>39</sub>H<sub>38</sub>N<sub>3</sub>O<sub>4</sub><sup>-</sup> 612.2867; Found 612.2881. HPLC: Chiralpak IB N-5 column, 70:30 hexanes/ isopropanol, 1 mL/min,  $t_R = 21.1$  min (minor), 25.2 min (major), 10.5:89.5 er.  $[\alpha]_D^{25} = -1.12$  (c 1.0, CH<sub>2</sub>Cl<sub>2</sub>); m.p. 71-79 °C.

The reaction of **1g** was performed on 0.2 mmol scale for 86 h at -30 °C, which was purified by column chromatography on silica gel (petroleum:EtOAc, 100:1 to 5:1) to give the recovered SM (*S*)-**1g** (30.1 mg, 50% yield) as yellow oil and product **3g** (53.7 mg, 45% yield) as a yellow solid.

(*S*)-*N*-(1-(*o*-tolyl)-1-(*p*-tolyl)ethyl)aniline ((*S*)-**1g**)

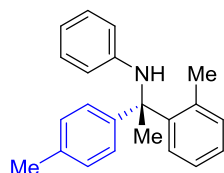

HPLC: Chiralpak IB column, 99:1 hexanes/ isopropanol, 1 mL/min,  $t_R = 4.7$  min (major), 5.9 min (minor), 90:10 er.  $[\alpha]_D^{25} = +10.14$  (c 1.0, CH<sub>2</sub>Cl<sub>2</sub>).

Dibenzyl (*R*)-1-(4-(((1-(*o*-tolyl)-1-(*p*-tolyl)ethyl)amino)phenyl)hydrazine-1,2-dicarboxylate

(**3g**)

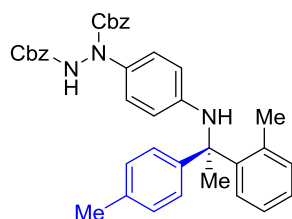

<sup>1</sup>H NMR (500 MHz, CDCl<sub>3</sub>)  $\delta$  7.59 (dd,  $J = 7.7, 1.6$  Hz, 1H), 7.40 – 7.17 (m, 12H), 7.15 – 6.98 (m, 7H), 6.39 (d,  $J = 8.4$  Hz, 2H), 5.13 (d,  $J = 14.8$  Hz, 4H), 4.53 (s, 1H), 2.32 (s, 3H), 2.05 (s, 3H), 2.05 (s, 3H). <sup>13</sup>C NMR (126 MHz, CDCl<sub>3</sub>)  $\delta$  156.2, 155.2, 145.1, 143.1, 137.2, 136.7, 136.1, 135.7, 132.9, 131.5, 129.3, 128.6, 128.5, 128.4, 128.3, 128.1, 127.5, 125.9, 125.8, 115.1, 68.2, 67.9, 63.1, 29.1, 22.5, 21.0. HRMS (ESI)  $m/z$ :  $[M-H]^-$  calculated for C<sub>38</sub>H<sub>36</sub>N<sub>3</sub>O<sub>4</sub><sup>-</sup> 598.2711; Found 598.2706. HPLC: Chiralpak ID column, 80:20 hexanes/ isopropanol, 1 mL/min,  $t_R = 25.5$  min (major), 28.6 min (minor), 94:6 er.  $[\alpha]_D^{25} = -6.78$  (c 1.0, CH<sub>2</sub>Cl<sub>2</sub>) ; m.p. 75-82 °C.

The reaction of **1h** was performed on 0.2 mmol scale for 35 h at -30 °C, which was purified by column chromatography on silica gel (petroleum:EtOAc, 100:1 to 5:1) to give the

recovered SM (*S*)-**1h** (31.5 mg, 49% yield) as a yellow oil and product **3h** (60.5 mg, 49% yield) as a yellow solid.

(*S*)-*N*-(1-(4-chlorophenyl)-1-(*o*-tolyl)ethyl)aniline ((*S*)-**1h**)

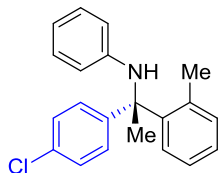

HPLC: Chiralpak IB column, 99:1 hexanes/ isopropanol, 1 mL/min,  $t_R = 5.7$  min (major), 9.5 min (minor), 97:3 er.  $[\alpha]_D^{25} = +2.70$  (c 1.0,  $\text{CH}_2\text{Cl}_2$ ).

Dibenzyl-(*R*)-1-(4-((1-(4-chlorophenyl)-1-(*o*-tolyl)ethyl)amino)phenyl)hydrazine-1,2-dicarboxylate (**3h**)

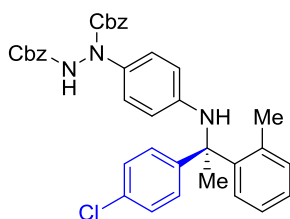

$^1\text{H}$  NMR (500 MHz,  $\text{CDCl}_3$ )  $\delta$  7.54 (d,  $J = 7.2$  Hz, 1H), 7.38 – 6.83 (m, 20H), 6.38 (d,  $J = 8.4$  Hz, 2H), 5.11 (d,  $J = 17.0$  Hz, 4H), 4.46 (s, 1H), 2.05 (s, 3H), 2.03 (s, 3H).  $^{13}\text{C}$  NMR (126 MHz,  $\text{CDCl}_3$ )  $\delta$  156.2, 155.5, 146.4, 144.7, 142.7, 136.9, 136.0, 135.6, 133.1, 132.8, 131.9, 128.6, 128.6, 128.5, 128.4, 128.3, 128.1, 127.7, 127.6, 126.0, 115.5, 68.2, 67.8, 63.1, 29.0, 22.4. HRMS (ESI)  $m/z$ :  $[\text{M}-\text{H}]^-$  calculated for  $\text{C}_{37}\text{H}_{33}\text{ClN}_3\text{O}_4^-$  618.2165; Found 618.2188. HPLC: Chiralpak IB column, 80:20 hexanes/ isopropanol, 1 mL/min,  $t_R = 17.7$  min (minor), 20.2 min (major), 7:93 er.  $[\alpha]_D^{25} = +0.90$  (c 1.0,  $\text{CH}_2\text{Cl}_2$ ); m.p. 74-81 °C.

The reaction of **1i** was performed on 0.2 mmol scale for 83 h at -20 °C, which was purified by column chromatography on neutral alumina (200-300 mesh) (petroleum:EtOAc, 100:1, 2:1 to 1:1) to give the recovered SM (*S*)-**1i** (30.3 mg, 48% yield) as a white solid and product **3i** (55.6 mg, 45% yield) as a yellow solid.

(*S*)-*N*-(1-(4-methoxyphenyl)-1-(*o*-tolyl)ethyl)aniline ((*S*)-**1i**)



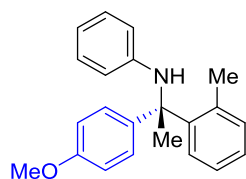

HPLC: Chiralpak IB N-5 column, 99:1 hexanes/ isopropanol, 1 mL/min,  $t_R = 7.6$  min (major), 9.4 min (minor), 95.5:4.5 er.  $[\alpha]_D^{25} = +14.60$  (c 1.0,  $\text{CH}_2\text{Cl}_2$ ) ; m.p. 96-103 °C.

Dibenzyl-(*R*)-1-(4-((1-(4-methoxyphenyl)-1-(*o*-tolyl)ethyl)amino)phenyl)hydrazine-1,2-dicarboxylate (**3i**)

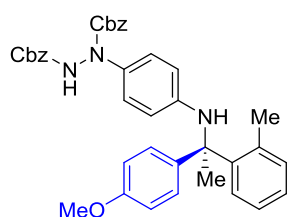

$^1\text{H}$  NMR (500 MHz, Acetone)  $\delta$  8.86 (m,  $J = 185.4$  Hz, 1H), 7.64 (d,  $J = 7.7$  Hz, 1H), 7.39 – 7.18 (m, 14H), 7.06 (m, 3H), 6.89 – 6.80 (m, 2H), 6.54 (d,  $J = 8.7$  Hz, 2H), 5.50 (s, 1H), 5.12 (d,  $J = 3.7$  Hz, 4H), 3.76 (s, 3H), 2.09 (s, 3H), 2.05 (s, 3H).  $^{13}\text{C}$  NMR (126 MHz, Acetone)  $\delta$  159.2, 157.0, 146.2, 144.3, 140.6, 137.9, 137.6, 137.5, 133.4, 132.8, 129.7, 129.2, 129.2, 129.1, 128.8, 128.7, 128.6, 128.2, 128.0, 126.5, 115.4, 114.2, 68.0, 67.5, 63.4, 55.4, 29.9, 22.6. HRMS (ESI)  $m/z$ :  $[\text{M}-\text{H}]^-$  calculated for  $\text{C}_{38}\text{H}_{36}\text{N}_3\text{O}_5^-$  614.2660; Found 614.2657. HPLC: Chiralpak IA column, 80:20 hexanes/ isopropanol, 1 mL/min,  $t_R = 20.0$  min (major), 23.8 min (minor), 94:6 er.  $[\alpha]_D^{25} = -3.74$  (c 1.0,  $\text{CH}_2\text{Cl}_2$ ) ; m.p. 67-73 °C.

The reaction of **1j** was performed on 0.2 mmol scale for 59 h at -30 °C, which was purified by column chromatography on silica gel (petroleum:EtOAc, 100:1, 5:1 ) to give the recovered SM (*S*)-**1j** (35.1 mg, 48% yield) as a yellow oil and product **3j** (62.5 mg, 47% yield) as a white solid.

(*S*)-*N*-(1-([1,1'-biphenyl]-4-yl)-1-(*o*-tolyl)ethyl)aniline ((*S*)-**1j**)

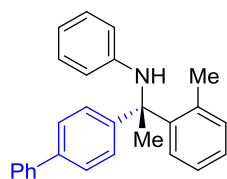

HPLC: Chiralpak IB column, 99:1 hexanes/ isopropanol, 1 mL/min,  $t_R = 7.9$  min (major), 9.9 min (minor), 92.5:7.5 er.  $[\alpha]_D^{25} = +6.80$  (c 1.0,  $\text{CH}_2\text{Cl}_2$ ).

Dibenzyl-(*R*)-1-(4-((1-([1,1'-biphenyl]-4-yl)-1-(*o*-tolyl)ethyl)amino)phenyl)hydrazine-1,2-dicarboxylate (**3j**)

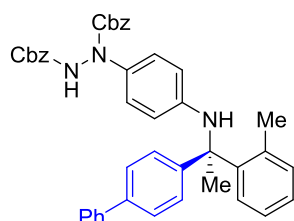

$^1\text{H}$  NMR (500 MHz,  $\text{CDCl}_3$ )  $\delta$  7.62 (d,  $J = 7.7$  Hz, 1H), 7.57 (d,  $J = 7.6$  Hz, 2H), 7.52 (d,  $J = 8.0$  Hz, 2H), 7.41 (t,  $J = 7.6$  Hz, 2H), 7.28 (m, 15H), 7.09 (d,  $J = 7.5$  Hz, 2H), 7.06 (s, 1H), 6.42 (d,  $J = 8.4$  Hz, 2H), 5.13 (d,  $J = 16.4$  Hz, 4H), 4.58 (s, 1H), 2.10 (s, 3H), 2.10 (s, 3H).  $^{13}\text{C}$  NMR (126 MHz,  $\text{CDCl}_3$ )  $\delta$  156.2, 155.6, 147.0, 145.0, 143.0, 140.5, 139.8, 137.2, 136.1, 135.7, 133.0, 131.7, 128.9, 128.7, 128.6, 128.5, 128.4, 128.3, 128.1, 127.6, 127.5, 127.2, 127.1, 126.4, 126.0, 115.3, 68.2, 67.9, 63.2, 29.1, 22.5. HRMS (ESI)  $m/z$ :  $[\text{M}-\text{H}]^-$  calculated for  $\text{C}_{43}\text{H}_{38}\text{N}_3\text{O}_4^-$  660.2867; Found 660.2865. HPLC: Chiralpak IA column, 70:30 hexanes/ isopropanol, 1 mL/min,  $t_R = 14.7$  min (major), 22.0 min (minor), 95.5:4.5 er.  $[\alpha]_D^{25} = -2.50$  (c 1.0,  $\text{CH}_2\text{Cl}_2$ ); m.p. 82-89 °C.

The reaction of **1k** was performed on 0.2 mmol scale for 59 h at -30 °C, which was purified by column chromatography on silica gel (petroleum:EtOAc, 100:1, 5:1 ) to give the recovered SM (*S*)-**1k** (30.3 mg, 48% yield) as green oil and product **3k** (59.2 mg, 48% yield) as yellow oil.

(*S*)-*N*-(1-(3-methoxyphenyl)-1-(*o*-tolyl)ethyl)aniline ((*S*)-**1k**)

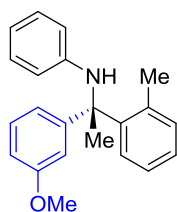

HPLC: Chiralpak IB column, 99:1 hexanes/ isopropanol, 1 mL/min,  $t_R = 7.2$  min (major), 8.7 min (minor), 93.5:6.5 er.  $[\alpha]_D^{25} = +7.2$  (c 1.0,  $\text{CH}_2\text{Cl}_2$ ).

Dibenzyl-(*R*)-1-(4-((1-(3-methoxyphenyl)-1-(*o*-tolyl)ethyl)amino)phenyl)hydrazine-1,2-dicarboxylate (**3k**)

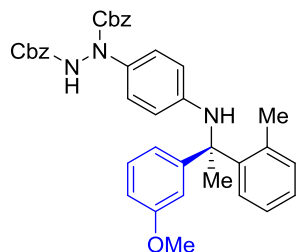

$^1\text{H}$  NMR (500 MHz,  $\text{CDCl}_3$ )  $\delta$  7.57 (d,  $J = 7.6$  Hz, 1H), 7.44 – 6.88 (m, 17H), 6.88 – 6.72 (m, 3H), 6.39 (d,  $J = 8.4$  Hz, 2H), 5.12 (d,  $J = 16.0$  Hz, 4H), 4.56 (s, 1H), 3.71 (s, 3H), 2.05 (s, 3H), 2.05 (s, 3H).  $^{13}\text{C}$  NMR (126 MHz,  $\text{CDCl}_3$ )  $\delta$  159.8, 156.2, 155.5, 149.9, 145.0, 142.9, 137.2, 136.1, 135.7, 132.9, 131.6, 129.6, 128.6, 128.5, 128.4, 128.3, 128.1, 127.6, 126.7, 125.9, 118.3, 115.2, 112.6, 111.5, 68.2, 67.8, 63.3, 55.3, 29.0, 22.4. HRMS (ESI)  $m/z$ :  $[\text{M}-\text{H}]^-$  calculated for  $\text{C}_{38}\text{H}_{36}\text{N}_3\text{O}_5^-$  614.2660; Found 614.2664. HPLC: Chiralpak IB column, 80:20 hexanes/isopropanol, 1 mL/min,  $t_{\text{R}} = 20.9$  min (major), 22.8 min (minor), 94.5:5.5 er.  $[\alpha]_{\text{D}}^{25} = +0.56$  (c 1.0,  $\text{CH}_2\text{Cl}_2$ ).

The reaction of **11** was performed on 0.2 mmol scale for 59 h at  $-30$  °C, which was purified by column chromatography on neutral alumina (200-300 mesh) (petroleum:EtOAc, 200:1, 2:1 to 1:1) to give the recovered SM (*S*)-**11** (32.8 mg, 48% yield) as yellow oil and product **3l** (57.4 mg, 45% yield) as a pink solid.

(*S*)-*N*-(1-(naphthalen-2-yl)-1-(*o*-tolyl)ethyl)aniline ((*S*)-**11**)

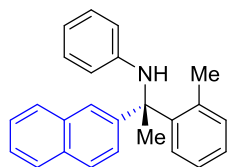

HPLC: Chiralpak IB column, 99:1 hexanes/ isopropanol, 1 mL/min,  $t_{\text{R}} = 7.0$  min (major), 8.0 min (minor), 95.5:4.5 er.  $[\alpha]_{\text{D}}^{25} = -9.74$  (c 1.0,  $\text{CH}_2\text{Cl}_2$ ).

Dibenzyl-(*R*)-1-(4-((1-(naphthalen-2-yl)-1-(*o*-tolyl)ethyl)amino)phenyl)hydrazine-1,2-dicarboxylate (**3l**)

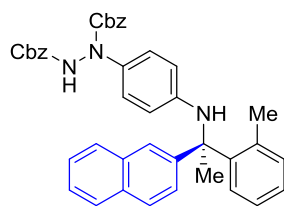

$^1\text{H}$  NMR (500 MHz,  $\text{CDCl}_3$ )  $\delta$  7.77 (dq,  $J = 19.1, 3.3$  Hz, 4H), 7.63 (d,  $J = 7.6$  Hz, 1H), 7.45 (dt,  $J = 6.0, 2.9$  Hz, 2H), 7.37 – 6.81 (m, 17H), 6.45 (d,  $J = 8.4$  Hz, 2H), 5.12 (d,  $J = 17.7$  Hz, 4H), 4.65 (d,  $J = 6.4$  Hz, 1H), 2.15 (s, 3H), 2.06 (s, 3H).  $^{13}\text{C}$  NMR (126 MHz,  $\text{CDCl}_3$ )  $\delta$  156.2, 155.3, 145.2, 143.0, 137.2, 136.0, 135.7, 133.2, 133.0, 132.4, 131.8, 128.6, 128.5, 128.4, 128.4, 128.3, 128.3, 128.1, 127.7, 127.6, 127.1, 126.3, 126.2, 125.9, 124.7, 124.4, 115.5, 68.2, 67.8, 63.5, 28.9, 22.4. HRMS (ESI)  $m/z$ :  $[\text{M}-\text{H}]^-$  calculated for  $\text{C}_{41}\text{H}_{36}\text{N}_3\text{O}_4^-$  634.2711; Found 634.2708. HPLC: Chiralpak IA column, 80:20 hexanes/ isopropanol, 1 mL/min,  $t_{\text{R}} = 20.8$  min (major), 27.7 min (minor), 92.5:7.5 er.  $[\alpha]_{\text{D}}^{25} = +7.26$  (c 1.0,  $\text{CH}_2\text{Cl}_2$ ) ; m.p. 84-88  $^\circ\text{C}$ .

The reaction of **1m** was performed on 0.2 mmol scale for 125 h at  $-30$   $^\circ\text{C}$ , which was purified by column chromatography on neutral alumina (200-300 mesh) (petroleum:EtOAc, 100:1, 2:1 to 1:1 ) to give the recovered SM (*S*)-**1m** (29.8 mg, 45% yield) as red oil and product **3m** (59.2 mg, 47% yield) as a yellow solid.

(*S*)-*N*-(1-(benzo[d][1,3]dioxol-5-yl)-1-(*o*-tolyl)ethyl)aniline ((*S*)-**1m**)

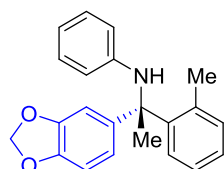

HPLC: Chiralpak IB column, 99:1 hexanes/ isopropanol, 1 mL/min,  $t_{\text{R}} = 7.1$  min (major), 8.3 min (minor), 91:9 er.  $[\alpha]_{\text{D}}^{25} = +11.54$  (c 1.0,  $\text{CH}_2\text{Cl}_2$ ).

Dibenzyl-(*R*)-1-(4-((1-(benzo[d][1,3]dioxol-5-yl)-1-(*o*-tolyl)ethyl)amino)phenyl)hydrazine-1, 2-di-carboxylate (**3m**)

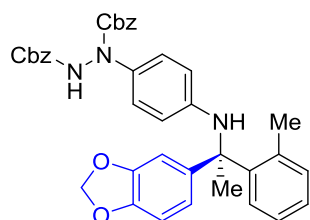

$^1\text{H}$  NMR (500 MHz, Acetone)  $\delta$  8.86 (m, 1H), 7.64 (d,  $J = 7.8$  Hz, 1H), 7.39 – 7.23 (m, 10H), 7.23 – 7.17 (m, 1H), 7.07 (dd,  $J = 15.2, 7.8$  Hz, 3H), 6.84 (d,  $J = 1.9$  Hz, 1H), 6.81 – 6.72 (m, 2H), 6.56 (d,  $J = 8.7$  Hz, 2H), 5.96 (q,  $J = 1.1$  Hz, 2H), 5.51 (s, 1H), 5.12 (d,  $J = 3.9$  Hz, 4H), 2.12 (s, 3H), 2.05 (s, 3H).  $^{13}\text{C}$  NMR (126 MHz, Acetone)  $\delta$  157.1, 155.7, 148.6, 147.1, 145.9, 144.3, 142.9, 137.9, 137.6, 137.5, 133.5, 132.9, 129.2, 129.2, 129.1, 128.8, 128.8, 128.6, 128.3, 128.2, 126.6, 120.1, 115.6, 108.3, 107.8, 107.8, 102.1, 68.0, 67.5, 63.8, 30.0, 22.6. HRMS (ESI)  $m/z$ :  $[\text{M}-\text{H}]^-$  calculated for  $\text{C}_{38}\text{H}_{34}\text{N}_3\text{O}_6^-$  628.2453; Found 628.2453. HPLC: Chiralpak IB column, 60:40 hexanes/ isopropanol, 1 mL/min,  $t_{\text{R}} = 11.1$  min (major), 13.2 min (minor), 92.5:7.5 er.  $[\alpha]_{\text{D}}^{25} = -2.26$  (c 1.0,  $\text{CH}_2\text{Cl}_2$ ); m.p. 80-85  $^\circ\text{C}$ .

The reaction of **1n** was performed on 0.2 mmol scale for 59 h at -30  $^\circ\text{C}$ , which was purified by column chromatography on neutral alumina (200-300 mesh) (petroleum:EtOAc, 100:1, 2:1 to 1:1) to give the recovered SM (*S*)-**1n** (31.6 mg, 49% yield) as a white solid and product **3n** (57.2 mg, 46% yield) as yellow oil.

(*S*)-*N*-(1-(3-chloro-2-methylphenyl)-1-phenylethyl)aniline ((*S*)-**1n**)

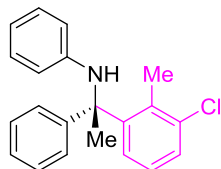

HPLC: Chiralpak IB column, 99:1 hexanes/ isopropanol, 1 mL/min,  $t_{\text{R}} = 5.8$  min (major), 8.3 min (minor), 94.5:5.5 er.  $[\alpha]_{\text{D}}^{25} = -14.92$  (c 1.0,  $\text{CH}_2\text{Cl}_2$ ); m.p. 87-92  $^\circ\text{C}$ .

Dibenzyl-(*R*)-1-(4-((1-(3-chloro-2-methylphenyl)-1-phenylethyl)amino)phenyl)hydrazine-1,2-di-carboxylate (**3n**)

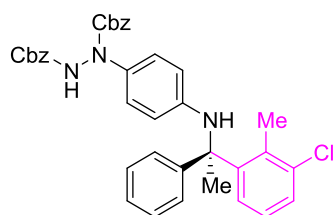

$^1\text{H}$  NMR (500 MHz,  $\text{CDCl}_3$ )  $\delta$  7.56 (d,  $J = 7.9$  Hz, 1H), 7.37 (d,  $J = 7.9$  Hz, 1H), 7.35 – 7.21 (m, 15H), 7.18 (t,  $J = 7.9$  Hz, 1H), 7.14 – 6.84 (m, 3H), 6.38 (d,  $J = 8.4$  Hz, 2H), 5.14 (d,  $J = 13.8$  Hz,

4H), 4.52 (s, 1H), 2.09 (s, 3H), 2.06 (s, 3H).  $^{13}\text{C}$  NMR (126 MHz,  $\text{CDCl}_3$ )  $\delta$  156.2, 155.4, 147.5, 145.4, 144.7, 137.1, 136.0, 135.7, 135.2, 132.0, 128.8, 128.8, 128.6, 128.5, 128.4, 128.3, 128.1, 127.6, 127.2, 127.1, 126.3, 125.8, 115.6, 68.2, 67.8, 63.8, 29.4, 18.8. HRMS (ESI)  $m/z$ :  $[\text{M-H}]^-$  calculated for  $\text{C}_{37}\text{H}_{33}\text{ClN}_3\text{O}_4^-$  618.2165; Found 618.2151. HPLC: Chiralpak IB column, 80:20 hexanes/isopropanol, 1 mL/min,  $t_R$  = 18.4 min (minor), 19.7 min (major), 5.5:94.5 er.  $[\alpha]_D^{25} = +23.76$  (c 1.0,  $\text{CH}_2\text{Cl}_2$ ).

The reaction of **1o** was performed on 0.2 mmol scale for 183 h at  $-30\text{ }^\circ\text{C}$ , which was purified by column chromatography on neutral alumina (200-300 mesh) (petroleum:EtOAc, 100:1, 2:1 to 1:1 ) to give the recovered SM (*S*)-**1o** (28.4 mg, 47% yield) as yellow oil and product **3o** (55 mg, 45% yield) as a yellow solid.

(*S*)-*N*-(1-(2,4-dimethylphenyl)-1-phenylethyl)aniline ((*S*)-**1o**)

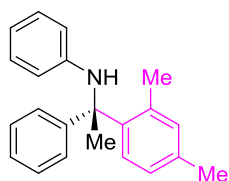

HPLC: Chiralpak IB column, 99:1 hexanes/ isopropanol, 1 mL/min,  $t_R$  = 4.7 min (major), 6.2 min (minor), 91.5:8.5 er.  $[\alpha]_D^{25} = +2.68$  (c 1.0,  $\text{CH}_2\text{Cl}_2$ ).

Dibenzyl-(*R*)-1-(4-((1-(2,4-dimethylphenyl)-1-phenylethyl)amino)phenyl)hydrazine-1,2-dicarboxylate (**3o**)

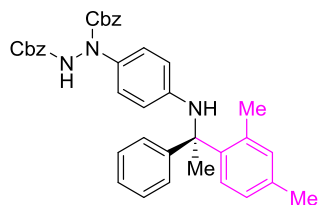

$^1\text{H}$  NMR (500 MHz,  $\text{CDCl}_3$ )  $\delta$  7.38 (d,  $J$  = 8.0 Hz, 1H), 7.25 – 6.74 (m, 20H), 6.33 (d,  $J$  = 8.4 Hz, 2H), 5.05 (d,  $J$  = 16.0 Hz, 4H), 4.45 (s, 1H), 2.23 (s, 3H), 1.97 (s, 3H), 1.93 (s, 3H).  $^{13}\text{C}$  NMR (126 MHz,  $\text{CDCl}_3$ )  $\delta$  156.2, 155.5, 155.2, 148.2, 145.2, 140.0, 137.0, 136.9, 136.1, 135.7, 133.8, 131.5, 128.6, 128.6, 128.5, 128.4, 128.3, 128.1, 126.9, 126.5, 125.9, 115.2, 68.2, 67.9, 63.1, 29.1, 22.3, 20.9. HRMS (ESI)  $m/z$ :  $[\text{M-H}]^-$  calculated for  $\text{C}_{38}\text{H}_{36}\text{N}_3\text{O}_4^-$  598.2711; Found

598.2700. HPLC: Chiralpak IB column, 80:20 hexanes/ isopropanol, 1 mL/min,  $t_R = 14.7$  min (minor), 16.4 min (major), 4.5:95.5 er.  $[\alpha]_D^{25} = +6.48$  (c 1.0,  $\text{CH}_2\text{Cl}_2$ ) ; m.p. 70-75 °C.

The reaction of **1p** was performed on 0.2 mmol scale for 34 h at -20 °C, which was purified by column chromatography on neutral alumina (200-300 mesh) (petroleum:EtOAc, 100:1, 2:1 to 1:1 ) to give the recovered SM (*S*)-**1p** (29.1mg, 45% yield) as yellow oil and product **3p** (53.2 mg, 43% yield) as a yellow solid.

(*S*)-*N*-(1-(4-chloro-2-methylphenyl)-1-phenylethyl)aniline ((*S*)-**1p**)

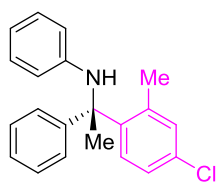

HPLC: Chiralpak IB N-5 column, 99:1 hexanes/ isopropanol, 1 mL/min,  $t_R = 7.0$  min (major), 12.2 min (minor), 90:10 er.  $[\alpha]_D^{25} = +1.84$  (c 1.0,  $\text{CH}_2\text{Cl}_2$ ).

Dibenzyl-(*R*)-1-(4-((1-(4-chloro-2-methylphenyl)-1-phenylethyl)amino)phenyl)hydrazine-1,2-di-carboxylate (**3p**)

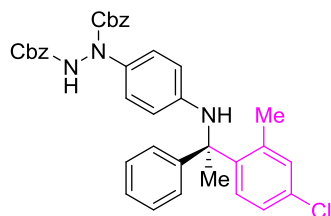

$^1\text{H}$  NMR (500 MHz,  $\text{CDCl}_3$ )  $\delta$  7.54 (d,  $J = 8.4$  Hz, 1H), 7.33 – 7.16 (m, 17H), 7.06 (m, 3H), 6.38 (d,  $J = 8.4$  Hz, 2H), 5.12 (d,  $J = 16.6$  Hz, 4H), 4.49 (s, 1H), 2.04 (s, 3H), 2.00 (s, 3H).  $^{13}\text{C}$  NMR (126 MHz,  $\text{CDCl}_3$ )  $\delta$  156.2, 155.2, 147.4, 144.7, 141.6, 139.3, 136.0, 135.6, 133.0, 132.6, 131.9, 129.8, 128.7, 128.6, 128.5, 128.4, 128.3, 128.1, 127.7, 127.2, 126.2, 125.8, 125.7, 115.3, 68.2, 67.8, 63.0, 29.1, 22.2. HRMS (ESI)  $m/z$ :  $[\text{M}-\text{H}]^-$  calculated for  $\text{C}_{37}\text{H}_{33}\text{ClN}_3\text{O}_4^-$  618.2165; Found 618.2162. HPLC: Chiralpak IB N-5 column, 70:30 hexanes/ isopropanol, 1 mL/min,  $t_R = 18.9$  min (minor), 22.3 min (major), 11.5:88.5 er.  $[\alpha]_D^{25} = +6.92$  (c 1.0,  $\text{CH}_2\text{Cl}_2$ ) ; m.p. 69-75 °C.

The reaction of **1q** was performed on 0.2 mmol scale for 65 h at -30 °C, which was purified by column chromatography on neutral alumina (200-300 mesh) (petroleum:EtOAc, 100:1, 2:1 to 1:1) to give the recovered SM (*S*)-**1q** (30.2mg, 48% yield) as a white solid and product **3q** (54.4 mg, 44% yield) as a yellow solid.

(*S*)-*N*-(1-(4-methoxy-2-methylphenyl)-1-phenylethyl)aniline ((*S*)-**1q**)

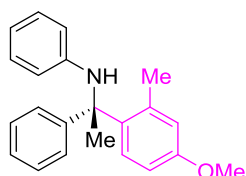

HPLC: Chiralpak IB N-5 column, 99:1 hexanes/ isopropanol, 1 mL/min,  $t_R = 7.9$  min (major), 11.4 min (minor), 93:7 er.  $[\alpha]_D^{25} = +6.2$  (c 1.0, CH<sub>2</sub>Cl<sub>2</sub>) ; m.p. 85-92 °C.

Dibenzyl(*R*)-1-(4-((1-(4-methoxy-2-methylphenyl)-1-phenylethyl)amino)phenyl)hydrazine-1, 2-di-carboxylate (**3q**)

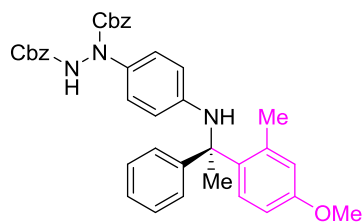

<sup>1</sup>H NMR (500 MHz, CDCl<sub>3</sub>)  $\delta$  7.48 (d,  $J = 8.7$  Hz, 1H), 7.26 (m, 15H), 7.12 – 6.71 (m, 4H), 6.64 (d,  $J = 2.8$  Hz, 1H), 6.41 (d,  $J = 8.4$  Hz, 2H), 5.14 (d,  $J = 14.1$  Hz, 4H), 4.53 (s, 1H), 3.80 (s, 3H), 2.04 (s, 3H), 2.02 (s, 3H). <sup>13</sup>C NMR (126 MHz, CDCl<sub>3</sub>)  $\delta$  158.6, 156.2, 155.2, 148.3, 145.1, 138.8, 136.0, 135.7, 135.2, 131.5, 129.4, 128.6, 128.5, 128.5, 128.4, 128.2, 128.1, 127.4, 126.9, 125.8, 118.5, 115.2, 110.3, 68.2, 67.8, 62.9, 55.1, 29.4, 22.5. HRMS (ESI)  $m/z$ : [M-H]<sup>-</sup> calculated for C<sub>38</sub>H<sub>36</sub>ClN<sub>3</sub>O<sub>5</sub><sup>-</sup> 614.2660; Found 614.2649. HPLC: Chiralpak IB N-5 column, 80:20 hexanes/ isopropanol, 1 mL/min,  $t_R = 36.2$  min (minor), 39.8 min (major), 5:95 er.  $[\alpha]_D^{25} = +16.56$  (c 1.0, CH<sub>2</sub>Cl<sub>2</sub>) ; m.p. 74-78 °C.

The reaction of **1r** was performed on 0.2 mmol scale for 83 h at -30 °C, which was purified by column chromatography on neutral alumina (200-300 mesh) (petroleum:EtOAc, 100:1, 2:1



to 1:1 ) to give the recovered SM (*S*)-**1r** (29.3mg, 49% yield) as a white solid and product **3r** (59.5 mg, 49% yield) as yellow solid.

(*S*)-*N*-(1-(2,5-dimethylphenyl)-1-phenylethyl)aniline ((*S*)-**1r**)

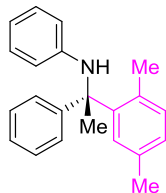

HPLC: Chiralpak IB column, 99:1 hexanes/ isopropanol, 1 mL/min,  $t_R = 5.2$  min (major), 6.0 min (minor), 95.5:4.5 er.  $[\alpha]_D^{25} = +61.4$  (c 1.0,  $\text{CH}_2\text{Cl}_2$ ) ; m.p. 91-98 °C.

Dibenzyl-(*R*)-1-(4-((1-(2,5-dimethylphenyl)-1-phenylethyl)amino)phenyl)hydrazine-1,2-dicarboxylate (**3r**)

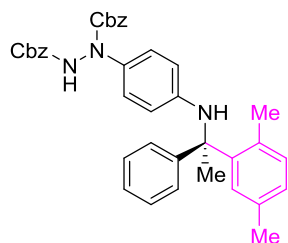

$^1\text{H}$  NMR (500 MHz,  $\text{CDCl}_3$ )  $\delta$  7.32 (s, 1H), 7.28 – 6.74 (m, 20H), 6.32 (d,  $J = 8.4$  Hz, 2H), 5.05 (d,  $J = 15.8$  Hz, 4H), 4.45 (s, 1H), 2.29 (s, 3H), 1.97 (s, 3H), 1.90 (s, 3H).  $^{13}\text{C}$  NMR (126 MHz,  $\text{CDCl}_3$ )  $\delta$  156.2, 155.0, 148.1, 145.1, 142.8, 136.1, 135.7, 135.1, 134.0, 132.9, 131.5, 129.0, 128.6, 128.5, 128.5, 128.4, 128.3, 128.1, 127.7, 127.1, 126.9, 125.9, 115.2, 68.2, 67.8, 63.3, 29.1, 21.9, 21.5. HRMS (ESI)  $m/z$ :  $[\text{M}-\text{H}]^-$  calculated for  $\text{C}_{38}\text{H}_{36}\text{N}_3\text{O}_4^-$  598.2711; Found 598.2688. HPLC: Chiralpak IB column, 80:20 hexanes/ isopropanol, 1 mL/min,  $t_R = 13.5$  min (minor), 14.4 min (major), 2.5:97.5 er.  $[\alpha]_D^{25} = -31.32$  (c 1.0,  $\text{CH}_2\text{Cl}_2$ ) ; m.p. 65-70 °C.

The reaction of **1s** was performed on 0.2 mmol scale for 82 h at -20 °C, which was purified by column chromatography on neutral alumina (200-300 mesh) (petroleum:EtOAc, 100:1, 2:1 to 1:1 ) to give the recovered SM (*S*)-**1s** (30.0mg, 47% yield) as yellow oil and product **3s** (51.8 mg, 42% yield) as a yellow solid.

(*S*)-*N*-(1-(5-methoxy-2-methylphenyl)-1-phenylethyl)aniline ((*S*)-**1s**)

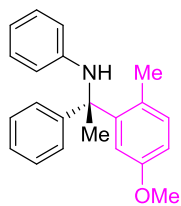

HPLC: Chiralpak IB N-5 column, 99:1 hexanes/ethanol, 1 mL/min,  $t_R = 8.3$  min (major), 8.8 min (minor), 93:7 er.  $[\alpha]_D^{25} = +57.92$  (c 1.0,  $\text{CH}_2\text{Cl}_2$ ).

Dibenzyl(*R*)-1-(4-((1-(5-methoxy-2-methylphenyl)-1-phenylethyl)amino)phenyl)hydrazine-1, 2-di-carboxylate (**3s**)

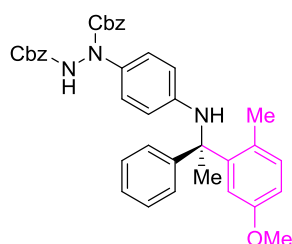

$^1\text{H}$  NMR (500 MHz,  $\text{CDCl}_3$ )  $\delta$  7.39 – 6.84 (m, 20H), 6.74 (dd,  $J = 8.2, 2.7$  Hz, 1H), 6.42 (d,  $J = 8.4$  Hz, 2H), 5.13 (d,  $J = 14.7$  Hz, 4H), 4.54 (s, 1H), 3.78 (s, 3H), 2.04 (s, 3H), 1.96 (s, 3H).  $^{13}\text{C}$  NMR (126 MHz,  $\text{CDCl}_3$ )  $\delta$  157.7, 156.2, 155.2, 147.8, 145.0, 144.4, 136.1, 135.7, 133.7, 131.6, 129.0, 128.6, 128.6, 128.5, 128.4, 128.3, 128.1, 127.7, 127.1, 125.9, 115.6, 115.2, 111.3, 68.2, 67.8, 63.3, 55.3, 29.0, 21.4. HRMS (ESI)  $m/z$ :  $[\text{M}-\text{H}]^-$  calculated for  $\text{C}_{38}\text{H}_{36}\text{N}_3\text{O}_5^-$  614.2660; Found 614.2648. HPLC: Chiralpak IA column, 80:20 hexanes/ ethanol, 1 mL/min,  $t_R = 23.9$  min (minor), 34.8 min (major), 4:96 er.  $[\alpha]_D^{25} = -33.32$  (c 1.0,  $\text{CH}_2\text{Cl}_2$ ); m.p. 73-79 °C.

The reaction of **1t** was performed on 0.2 mmol scale for 65 h at -20 °C, which was purified by column chromatography on neutral alumina (200-300 mesh) (petroleum:EtOAc, 100:1, 2:1 to 1:1) to give the recovered SM (*S*)-**1t** (28.0mg, 47% yield) as pink oil and product **3t** (53.4 mg, 45% yield) as a yellow solid.

(*S*)-*N*-(1-(2-ethylphenyl)-1-phenylethyl)aniline ((*S*)-**1t**)

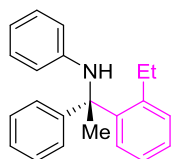

HPLC: Chiralpak IB N-5 column, 99:1 hexanes/ isopropanol, 1 mL/min,  $t_R = 5.6$  min (major), 6.9 min (minor), 93.5:6.5 er.  $[\alpha]_D^{25} = +12.68$  (c 1.0,  $\text{CH}_2\text{Cl}_2$ ).

Dibenzyl-(*R*)-1-(4-((1-(2-ethylphenyl)-1-phenylethyl)amino)phenyl)hydrazine-1,2-dicarboxylate (**3t**)

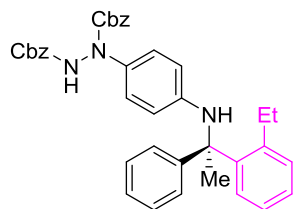

$^1\text{H}$  NMR (500 MHz,  $\text{CDCl}_3$ )  $\delta$  7.55 (d,  $J = 7.9$  Hz, 1H), 7.39 – 6.80 (m, 21H), 6.40 (d,  $J = 8.4$  Hz, 2H), 5.12 (d,  $J = 15.3$  Hz, 4H), 4.51 (s, 1H), 2.54 – 2.39 (m,  $J = 7.3$  Hz, 2H), 2.05 (s, 3H), 0.85 (t,  $J = 7.5$  Hz, 3H).  $^{13}\text{C}$  NMR (126 MHz,  $\text{CDCl}_3$ )  $\delta$  156.2, 155.2, 148.4, 145.2, 143.3, 143.0, 136.0, 135.7, 131.7, 130.9, 128.6, 128.5, 128.4, 128.3, 128.1, 128.0, 127.7, 127.5, 127.1, 126.9, 126.1, 125.5, 115.7, 68.2, 67.8, 63.4, 29.2, 26.6, 15.1. HRMS (ESI)  $m/z$ :  $[\text{M}-\text{H}]^-$  calculated for  $\text{C}_{38}\text{H}_{36}\text{N}_3\text{O}_4^-$  598.2711; Found 598.2689. HPLC: Chiralpak IB N-5 column, 80:20 hexanes/isopropanol, 1 mL/min,  $t_R = 28.7$  min (minor), 31.4 min (major), 10.5:89.5 er.  $[\alpha]_D^{25} = +9.44$  (c 1.0,  $\text{CH}_2\text{Cl}_2$ ); m.p. 66-71  $^\circ\text{C}$ .

The reaction of **1u** was performed on 0.2 mmol scale for 95 h at  $-10$   $^\circ\text{C}$ , which was purified by column chromatography on neutral alumina (200-300 mesh) (petroleum:EtOAc, 100:1, 2:1 to 1:1) to give the recovered SM (*S*)-**1u** (31.6 mg, 49% yield) as a yellow oil and product **3u** (60.4 mg, 49% yield) as a yellow solid.

(*S*)-*N*-(1-(naphthalen-1-yl)-1-phenylethyl)aniline ((*S*)-**1u**)

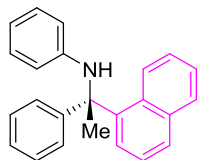

HPLC: Chiralpak IB N-5 column, 99:1 hexanes/isopropanol, 1 mL/min,  $t_R = 7.9$  min (major), 8.9 min (minor), 88.5:11.5 er.  $[\alpha]_D^{25} = -24.00$  (c 1.0,  $\text{CH}_2\text{Cl}_2$ ).

Dibenzyl-(*R*)-1-(4-((1-(naphthalen-1-yl)-1-phenylethyl)amino)phenyl)hydrazine-1,2-dicarboxylate (**3u**)

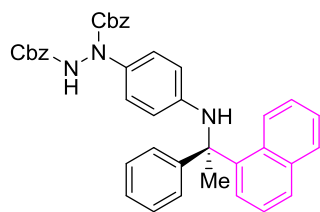

$^1\text{H}$  NMR (500 MHz,  $\text{CDCl}_3$ )  $\delta$  8.08 (d,  $J = 8.8$  Hz, 1H), 7.80 (t,  $J = 8.6$  Hz, 2H), 7.64 (d,  $J = 7.3$  Hz, 1H), 7.42 (t,  $J = 7.8$  Hz, 1H), 7.39 – 7.31 (m, 3H), 7.31 – 7.15 (m, 14H), 7.13 – 6.81 (m, 3H), 6.40 (d,  $J = 8.5$  Hz, 2H), 5.10 (d,  $J = 17.5$  Hz, 4H), 4.66 (s, 1H), 2.22 (s, 3H).  $^{13}\text{C}$  NMR (126 MHz,  $\text{CDCl}_3$ )  $\delta$  156.2, 155.4, 147.5, 145.0, 141.5, 136.0, 135.6, 135.1, 132.1, 130.9, 129.2, 129.1, 128.6, 128.5, 128.4, 128.3, 128.1, 127.7, 127.2, 127.0, 126.8, 126.4, 125.8, 125.6, 125.3, 125.2, 124.9, 116.5, 68.2, 67.8, 64.1, 28.9. HRMS (ESI)  $m/z$ :  $[\text{M}-\text{H}]^-$  calculated for  $\text{C}_{40}\text{H}_{34}\text{N}_3\text{O}_4^-$  620.2554; Found 620.2539. HPLC: Chiralpak IG column, 70:30 hexanes/isopropanol, 1 mL/min,  $t_{\text{R}} = 21.1$  min (minor), 30.6 min (major), 11.5:88.5 er.  $[\alpha]_{\text{D}}^{25} = +44.20$  (c 1.0,  $\text{CH}_2\text{Cl}_2$ ); m.p. 83-91  $^{\circ}\text{C}$ .

The reaction of **1v** was performed on 0.2 mmol scale for 71 h at  $-30$   $^{\circ}\text{C}$ , which was purified by column chromatography on neutral alumina (200-300 mesh) (petroleum:EtOAc, 100:1, 2:1 to 1:1) to give the recovered SM (*S*)-**1v** (34.6 mg, 48% yield) as a yellow oil and product **3v** (59.4 mg, 45% yield) as a yellow solid.

(*S*)-*N*-(1-(2-benzylphenyl)-1-phenylethyl)aniline ((*S*)-**1v**)

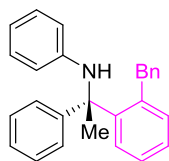

HPLC: Chiralpak IB N-5 column, 99:1 hexanes/ isopropanol, 1 mL/min,  $t_{\text{R}} = 8.1$  min (major), 9.9 min (minor), 99:1 er.  $[\alpha]_{\text{D}}^{25} = -46.88$  (c 1.0,  $\text{CH}_2\text{Cl}_2$ ).

Dibenzyl-(*R*)-1-(4-((1-(2-benzylphenyl)-1-phenylethyl)amino)phenyl)hydrazine-1,2-dicarboxylate (**3v**)

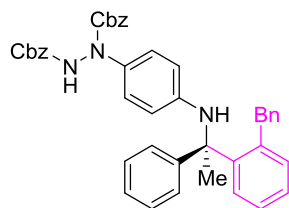

$^1\text{H}$  NMR (400 MHz, Acetone)

$^1\text{H}$  NMR (400 MHz, Acetone)  $\delta$  8.95 (m, 1H), 7.75 (dd,  $J = 8.0, 1.4$  Hz, 1H), 7.45 (d,  $J = 7.5$  Hz, 2H), 7.42 – 7.23 (m, 14H), 7.23 – 7.17 (m, 1H), 7.09 (q,  $J = 7.3$  Hz, 5H), 6.85 (dd,  $J = 7.7, 1.5$  Hz, 1H), 6.76 – 6.68 (m, 2H), 6.63 – 6.45 (m, 2H), 5.67 (s, 1H), 5.15 (d,  $J = 3.8$  Hz, 4H), 4.05 – 3.75 (m, 2H), 2.10 (s, 3H).  $^{13}\text{C}$  NMR (126 MHz, Acetone)  $\delta$  157.1, 155.7, 149.0, 146.1, 144.3, 142.3, 141.5, 137.6, 137.5, 133.1, 132.8, 130.2, 129.2, 129.2, 129.1, 128.9, 128.8, 128.7, 128.6, 128.5, 128.3, 128.1, 127.6, 126.9, 126.6, 126.4, 125.9, 115.9, 68.0, 67.5, 63.9, 39.9, 30.5. HRMS (ESI)  $m/z$ :  $[\text{M-H}]^-$  calculated for  $\text{C}_{43}\text{H}_{38}\text{N}_3\text{O}_4^-$  660.2867; Found 660.2847. HPLC: Chiralpak IB N-5 column, 80:20 hexanes/ isopropanol, 1 mL/min,  $t_{\text{R}} = 30.9$  min (minor), 33.8 min (major), 1.5:98.5 er.  $[\alpha]_{\text{D}}^{25} = +67.48$  (c 1.0,  $\text{CH}_2\text{Cl}_2$ ); m.p. 67-74  $^\circ\text{C}$ .

The reaction of **1w** was performed on 0.2 mmol scale for 24 h at  $-30^\circ\text{C}$ , which was purified by column chromatography on neutral alumina (200-300 mesh) (petroleum:EtOAc, 100:1, 2:1 to 1:1) to give the recovered SM (*S*)-**1w** (27.1 mg, 45% yield) as a white solid and product **3w** (52.6 mg, 44% yield) as yellow solid.

(*S*)-*N*-(1-phenyl-1-(*o*-tolyl)propyl)aniline ((*S*)-**1w**)

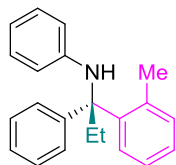

HPLC: Chiralpak IB N-5 column, 99:1 hexanes/ isopropanol, 1 mL/min,  $t_{\text{R}} = 4.8$  min (major), 5.6 min (minor), 94.5:5.5 er.  $[\alpha]_{\text{D}}^{25} = -35.68$  (c 1.0,  $\text{CH}_2\text{Cl}_2$ ); m.p. 87-95  $^\circ\text{C}$ .

Dibenzyl (*R*)-1-(4-((1-phenyl-1-(*o*-tolyl)propyl)amino)phenyl)hydrazine-1,2-dicarboxylate (**3w**)

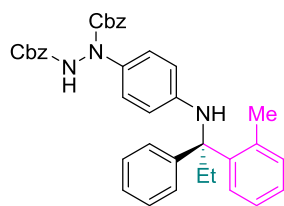

$^1\text{H}$  NMR (500 MHz,  $\text{CDCl}_3$ )  $\delta$  7.75 (d,  $J = 7.8$  Hz, 1H), 7.38 – 6.75 (m, 21H), 6.38 (d,  $J = 8.5$  Hz, 2H), 5.11 (d,  $J = 14.3$  Hz, 4H), 4.69 (s, 1H), 2.75 (dq,  $J = 14.3, 7.3$  Hz, 1H), 2.28 (dq,  $J = 14.1, 7.1$  Hz, 1H), 1.99 (s, 3H), 0.69 (t,  $J = 7.2$  Hz, 3H).  $^{13}\text{C}$  NMR (126 MHz,  $\text{CDCl}_3$ )  $\delta$  156.2, 155.2, 145.0, 143.6, 137.8, 136.0, 135.7, 133.0, 131.8, 128.6, 128.5, 128.4, 128.3, 128.1, 127.7, 127.5, 127.4, 127.1, 126.5, 126.3, 126.2, 125.9, 125.7, 115.4, 68.2, 67.8, 65.4, 31.4, 22.0, 8.2. HRMS (ESI)  $m/z$ :  $[\text{M}-\text{H}]^-$  calculated for  $\text{C}_{38}\text{H}_{36}\text{N}_3\text{O}_4^-$  598.2711; Found 598.2687. HPLC: Chiralpak IB N-5 column, 80:20 hexanes/ ethanol, 1 mL/min,  $t_{\text{R}} = 12.5$  min (minor), 13.6 min (major), 10:90 er.  $[\alpha]_{\text{D}}^{25} = +36.40$  (c 1.0,  $\text{CH}_2\text{Cl}_2$ ); m.p. 70-77 °C.

The reaction of **1x** was performed on 0.17 mmol scale for 31 h at -30 °C, which was purified by column chromatography on neutral alumina (200-300 mesh) (petroleum:EtOAc, 100:1, 2:1 to 1:1 ) to give the recovered SM (*S*)-**1x** (26.3 mg, 41% yield) as a yellow solid and product **3x** (51.8 mg, 45% yield) as a yellow solid.

(*S*)-*N*-(1-(2-benzylphenyl)-1-phenylpropyl)aniline ((*S*)-**1x**)

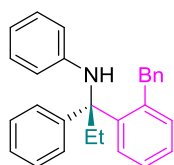

$[\alpha]_{\text{D}}^{25} = -128.48$  (c 1.0,  $\text{CH}_2\text{Cl}_2$ ); m.p. 97-102 °C.

Due to the low polarity of compound (*S*)-**1x**, its er value could not be determined precisely by direct chiral HPLC analysis. As a consequence, (*S*)-**1x** was converted into the corresponding (*S*)-**3x** through the achiral phosphoric acid catalyzed amination with azodicarboxylate **2a**, and er value of (*S*)-**3x** was determined instead. HPLC date of (*S*)-**3x**: Chiralpak ID column, 80:20 hexanes/ isopropanol, 1 mL/min,  $t_{\text{R}} = 24.8$  min (major), > 99.5:0.5 er.

Dibenzyl-(*R*)-1-(4-((1-(2-benzylphenyl)-1-phenylpropyl)amino)phenyl)hydrazine-1,2-dicarboxylate (**3x**)

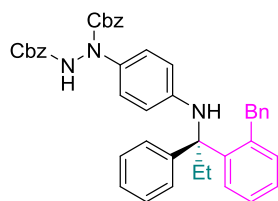

$^1\text{H}$  NMR (400 MHz, Acetone)  $\delta$  8.92 (m, 1H), 7.94 (d,  $J = 7.9$  Hz, 1H), 7.48 (d,  $J = 7.8$  Hz, 2H), 7.43 – 7.20 (m, 14H), 7.17 (t,  $J = 7.5$  Hz, 1H), 7.13 – 6.92 (m, 5H), 6.79 (dd,  $J = 7.7$ , 1.5 Hz, 1H), 6.66 – 6.50 (m, 4H), 5.73 (s, 1H), 5.15 (d,  $J = 3.4$  Hz, 4H), 3.98 (dd,  $J = 16.1$ , 2.6 Hz, 1H), 3.83 (d,  $J = 16.1$  Hz, 1H), 2.89 (dq,  $J = 14.1$ , 7.1 Hz, 1H), 2.37 (dq,  $J = 14.1$ , 7.1 Hz, 1H), 0.71 (t,  $J = 7.1$  Hz, 3H).  $^{13}\text{C}$  NMR (101 MHz, Acetone)  $\delta$  157.1, 155.7, 146.3, 144.9, 142.5, 142.0, 137.6, 137.5, 133.3, 132.8, 130.2, 129.2, 129.2, 128.8, 128.8, 128.7, 128.6, 128.4, 128.2, 127.9, 127.4, 127.1, 126.6, 126.3, 116.0, 68.0, 67.5, 66.0, 66.0, 39.3, 8.3. HRMS (ESI)  $m/z$ :  $[\text{M-H}]^-$  calculated for  $\text{C}_{44}\text{H}_{40}\text{N}_3\text{O}_4^-$  674.3024; Found 674.3008. HPLC: Chiralpak ID column, 80:20 hexanes/ isopropanol, 1 mL/min,  $t_{\text{R}} = 22.6$  min (major), 25.1 min (minor), 95:5 er.  $[\alpha]_{\text{D}}^{25} = +122.60$  (c 1.0,  $\text{CH}_2\text{Cl}_2$ ); m.p. 66-74  $^\circ\text{C}$ .

The reaction of **1y** was performed on 0.17 mmol scale for 31 h at  $-30$   $^\circ\text{C}$ , which was purified by column chromatography on neutral alumina (200-300 mesh) (petroleum:EtOAc, 100:1, 2:1 to 1:1) to give the recovered SM (*S*)-**1y** (28.8 mg, 42% yield) as a yellow oil and product **3y** (48 mg, 40% yield) as a yellow solid.

(*S*)-*N*-(1-(2-benzylphenyl)-1-phenylpentyl)aniline ((*S*)-**1y**)

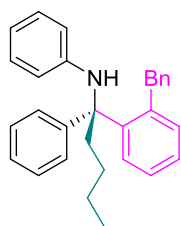

$[\alpha]_{\text{D}}^{25} = -62.88$  (c 1.0,  $\text{CH}_2\text{Cl}_2$ ).

Due to the low polarity of compound (*S*)-**1y**, its er value could not be determined precisely by direct chiral HPLC analysis. As a consequence, (*S*)-**1y** was converted into the corresponding (*S*)-**3y** through the achiral phosphoric acid catalyzed amination with azodicarboxylate **2a**, and er value of (*S*)-**3y** was determined instead. HPLC data for (*S*)-**3y**: Chiralpak IA column, 80:20 hexanes/ isopropanol, 1 mL/min,  $t_{\text{R}} = 8.7$  min (major), > 99.5:0.5 er.

Dibenzyl-(*R*)-1-(4-((1-(2-benzylphenyl)-1-phenylpentyl)amino)phenyl)hydrazine-1,2-dicarboxylate (**3y**)

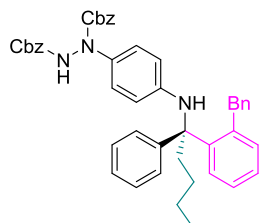

$^1\text{H}$  NMR (500 MHz, Acetone)  $\delta$  9.05-8.68 (m, 1H), 7.93 (d,  $J = 8.0$  Hz, 1H), 7.48 (d,  $J = 7.8$  Hz, 2H), 7.41 – 7.19 (m, 14H), 7.16 (t,  $J = 7.5$  Hz, 1H), 7.03 (q,  $J = 10.8$  Hz, 5H), 6.80 (d,  $J = 7.7$  Hz, 1H), 6.59 (d,  $J = 7.6$  Hz, 4H), 5.70 (s, 1H), 5.14 (s, 4H), 3.97 (d,  $J = 16.1$  Hz, 1H), 3.82 (d,  $J = 16.1$  Hz, 1H), 2.82 – 2.69 (m, 1H), 2.37 (m, 1H), 1.29 (m, 1H), 1.17 (m, 2H), 0.98 (m, 1H), 0.72 (t,  $J = 7.3$  Hz, 3H).  $^{13}\text{C}$  NMR (126 MHz, Acetone)  $\delta$  157.1, 155.7, 146.7, 146.0, 144.8, 142.5, 141.8, 137.6, 137.5, 133.3, 132.9, 130.2, 129.2, 129.2, 128.9, 128.8, 128.7, 128.6, 128.6, 128.3, 127.9, 127.4, 127.3, 127.1, 126.6, 126.3, 125.8, 116.1, 68.1, 67.5, 65.9, 40.0, 39.4, 26.6, 23.5, 14.4. HRMS (ESI)  $m/z$ :  $[\text{M}-\text{H}]^-$  calculated for  $\text{C}_{46}\text{H}_{44}\text{N}_3\text{O}_4^-$  702.3337; Found 702.3315. HPLC: Chiralpak IA column, 80:20 hexanes/ isopropanol, 1 mL/min,  $t_{\text{R}} = 9.2$  min (minor), 9.9 min (major), 10:90 er.  $[\alpha]_{\text{D}}^{25} = +100.08$  (c 1.0,  $\text{CH}_2\text{Cl}_2$ ); m.p. 66-73 °C.

### Large-scale kinetic resolution of racemic **1a**

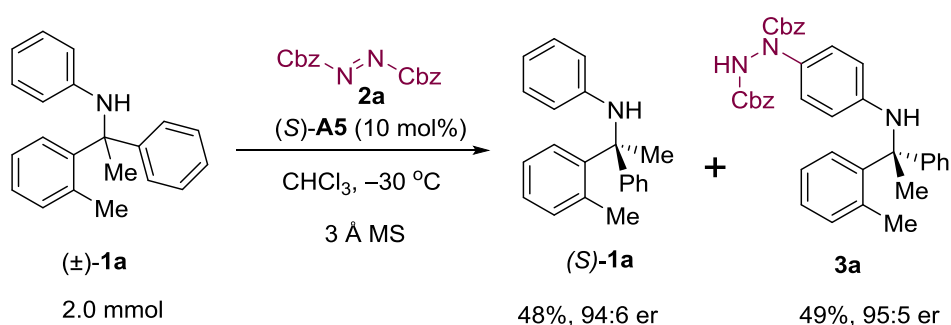

To a mixture of racemic **1a** (2 mmol, 1.0 eq), dibenzyl azodicarboxylate **2a** (2 mmol, 1.0 eq), CPA (*S*)-A5 (0.2 mmol, 10 mol%) and activated 3 Å MS (800 mg) was added  $\text{CHCl}_3$  (20 mL), which was precooled to  $-30\text{ }^\circ\text{C}$ . After achieving appropriate conversion as indicated by HPLC analysis of the reaction mixture, the mixture was quenched with a few drops of  $\text{Et}_3\text{N}$ . Then the mixture was filtered through Celite and concentrated under vacuum to give a residue,



which was purified by silica gel column chromatography (petroleum:EtOAc, 100:1 to 5:1) to give the recovered SM (*S*)-**1a** (276 mg, 48% yield, 94:6 er) and product (*R*)-**3a** (567 mg, 49% yield, 95:5 er).

### Transformations of the chiral products

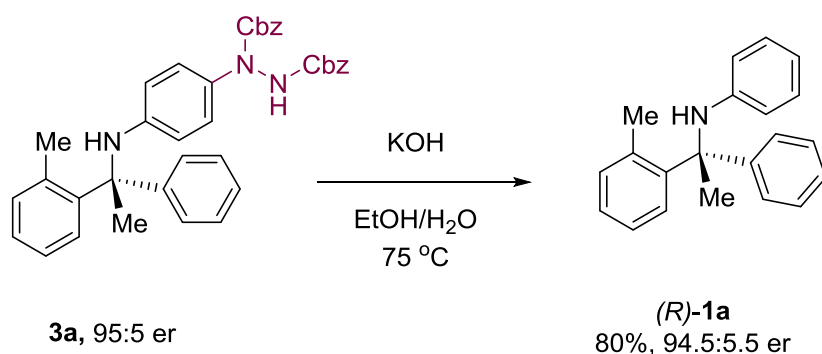

To a solution of **3a** (58.5 mg, 0.1 mmol) in EtOH (2 mL) was added a solution of KOH (56 mg, 10 eq) in H<sub>2</sub>O (1 mL) at rt. After stirring at 75 °C overnight, the mixture was cooled to rt and extracted with ether (5 x 2 mL). The combined organic layer was then washed with brine, dried over anhydrous Na<sub>2</sub>SO<sub>4</sub>, filtered and concentrated under reduced pressure to give a residue, which was purified by silica gel column chromatography to give (*R*)-**1a** (23 mg, 80%, 94.5:5.5 er) as a white solid.  $[\alpha]_{25}^D = -22.36$  (c 1.0, CH<sub>2</sub>Cl<sub>2</sub>); m.p. 85-91 °C. HPLC: Chiralpak IB column, 99:1 hexanes/ isopropanol, 1 mL/min; t<sub>R</sub> = 5.0 min (minor), 6.2 min (major); 5.5:94.5 er.

### Benzyl (*R*)-(4-((1-phenyl-1-(*o*-tolyl)ethyl)amino)phenyl)carbamate (**4a**)

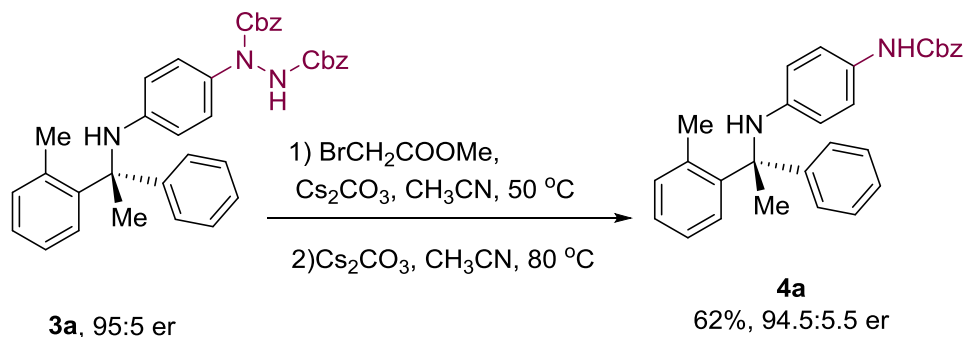

To a solution of **3a** (58.5 mg, 0.1 mmol) in acetonitrile (1.0 mL) was added methyl bromoacetate (18 μL, 31 mg, 2.0 equiv.) and Cs<sub>2</sub>CO<sub>3</sub> (82 mg, 0.25 mmol, 2.5 equiv.) at rt. After

stirring at 50 °C for 12 h, the reaction mixture was diluted with EtOAc (30 mL) and washed with brine 15 mL×2. The combined organic layer was dried over Na<sub>2</sub>SO<sub>4</sub>, filtered and concentrated in vacuo to give a residue.

To a solution of the above residue in acetonitrile (1 mL) was added Cs<sub>2</sub>CO<sub>3</sub> (98 mg, 0.3 mmol, 3.0 equiv.) at rt. After stirring at 80 °C for 18 h, the reaction mixture was diluted with 30 mL EtOAc and washed with brine 15 mL×2. The combined organic layer was dried over Na<sub>2</sub>SO<sub>4</sub>, filtered and concentrated in vacuo to give a residue, which was purified by flash column chromatography (300~400 mesh silica gel, petroleum ether/EA = 10/1) to afford the product **4a** (26.0 mg, 62%, 94.5:5.5 er) as colorless oil. <sup>1</sup>H NMR (400 MHz, CDCl<sub>3</sub>) δ 7.61 (dd, *J* = 7.5, 1.7 Hz, 1H), 7.40 – 7.17 (m, 12H), 7.10 – 6.93 (m, 3H), 6.48 – 6.29 (m, 3H), 5.14 (s, 2H), 4.35 (s, 1H), 2.04 (s, 3H). <sup>13</sup>C NMR (101 MHz, CDCl<sub>3</sub>) δ 153.9, 148.2, 143.4, 142.5, 137.2, 136.5, 132.9, 128.7, 128.6, 128.4, 128.4, 127.5, 126.9, 126.0, 125.8, 120.7, 116.7, 66.9, 63.5, 29.3, 22.4. HRMS (ESI) *m/z*: [M-H]<sup>-</sup> calculated for C<sub>29</sub>H<sub>27</sub>N<sub>2</sub>O<sub>2</sub><sup>-</sup> 435.2078; Found 435.2028. HPLC: Chiralpak IA column, 80:20 hexanes/ isopropanol, 1 mL/min, *t<sub>R</sub>* = 10.0 min (major), 10.9 min (minor), 94.5:5.5 er. [α]<sub>D</sub><sup>25</sup> = +14.68 (c 1.0, CH<sub>2</sub>Cl<sub>2</sub>).

(*S*)-4-bromo-*N*-(1-phenyl-1-(*o*-tolyl)ethyl)aniline (**5a**)

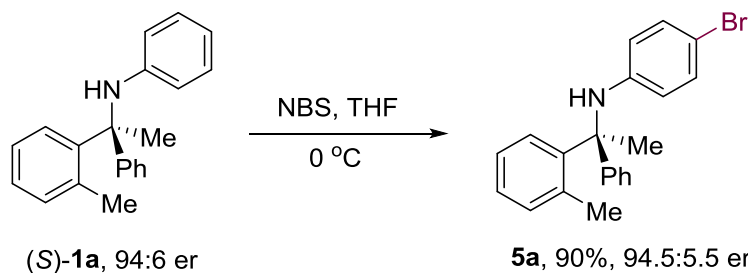

To a solution of the (*S*)-**1a** (28.7 mg, 0.1 mmol, 1.0 eq) in THF (0.5 mL) was added a solution of NBS (17 mg, 0.1 mmol) in THF (0.5 mL) slowly at 0 °C. After stirring at this temperature for 1 h, the mixture was concentrated under vacuum to give a residue, which was purified by flash column chromatography (300~400 mesh silica gel, petroleum ether/EA = 100/1) to yield the corresponding *para*-brominated product **4a** (32.9 mg, 90% yield, 94.5:5.5 er). <sup>1</sup>H NMR (500 MHz, CDCl<sub>3</sub>) δ 7.59 (dd, *J* = 7.7, 1.6 Hz, 1H), 7.35 – 7.18 (m, 7H), 7.11 – 7.03 (m, 3H), 6.51 – 6.18 (m, 2H), 4.50 (s, 1H), 2.07 (s, 3H), 2.03 (s, 3H). <sup>13</sup>C NMR (126 MHz, CDCl<sub>3</sub>) δ 147.9, 144.9, 142.8, 137.2, 133.0, 131.6, 128.7, 128.4, 127.7, 127.1, 126.0, 125.9, 117.1, 109.4, 63.4,

29.3, 22.4. HRMS (ESI)  $m/z$ :  $[M+H]^+$  calculated for  $C_{21}H_{21}BrN^+$  366.0852; Found 366.0845.

HPLC: Chiralpak IB N-5 column, 99:1 hexanes/ isopropanol, 1 mL/min,  $t_R$  = 7.8 min (major), 8.8 min (minor), 94.5:5.5 er.  $[\alpha]_D^{25}$  = -4.04 (c 1.0,  $CH_2Cl_2$ ).

(*S*)-2,4-dibromo-N-(1-phenyl-1-(*o*-tolyl)ethyl)aniline (**6a**)

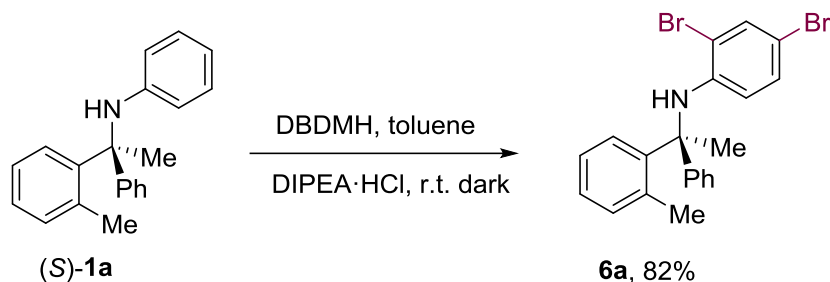

To a solution of the (*S*)-**1a** (28.7 mg, 0.1 mmol, 1.0 eq), DIPEA HCl (3 mg, 0.02 mmol, 0.2 eq) in toluene (1 mL) was added DBDMH (27 mg, 0.095 mmol, 0.95 eq) at 25°C in the absence of light. The mixture was stirred at 25°C overnight and then quenched by adding saturated aqueous  $Na_2SO_3$  (5 mL). The solution was diluted with water (5 mL) and extracted with EtOAc (3 × 10 mL). The combined organic extracts were washed with brine, dried with anhydrous  $Na_2SO_4$ , filtered and concentrated under vacuum to give a residue, which was purified by flash column chromatography (300~400 mesh silica gel, petroleum ether/EtOAc = 100/1) to yield the corresponding dibrominated product **6a** (36.3 mg, 82%).  $^1H$  NMR (400 MHz,  $CDCl_3$ )  $\delta$  7.59 (dd,  $J$  = 7.8, 1.5 Hz, 1H), 7.52 (d,  $J$  = 2.3 Hz, 1H), 7.37 – 7.19 (m, 7H), 7.08 (dd,  $J$  = 7.5, 1.7 Hz, 1H), 6.91 (dd,  $J$  = 8.9, 2.3 Hz, 1H), 6.20 (d,  $J$  = 8.9 Hz, 1H), 5.46 (s, 1H), 2.06 (s, 3H), 1.98 (s, 3H).  $^{13}C$  NMR (101 MHz,  $CDCl_3$ )  $\delta$  147.8, 141.9, 141.7, 137.6, 134.4, 133.2, 130.6, 128.9, 128.3, 127.9, 127.3, 126.1, 125.4, 114.6, 111.5, 108.1, 63.5, 29.8, 22.1. HRMS (ESI)  $m/z$ :  $[M+H]^+$  calculated for  $C_{21}H_{20}Br_2N^+$  445.9937; Found 445.9911.  $[\alpha]_D^{25}$  = +30.34 (c 1.0,  $CH_2Cl_2$ ).

## X-Ray Crystal Structure

Hexane (0.5 mL) was added to dissolve the compound (*S*)-**1a** (10 mg) in a sample tube at room temperature. Then the mixture was filtered through the filter membrane into the vial. The single crystal of (*S*)-**1a** was obtained by slowly evaporating solvent at room temperature under the air conditions.

Crystal measurement: X-ray crystal structures of (*S*)-**1a** were determined at 150 K by using D8 VENTURE dual sources single crystal X-ray diffractometer. ORTEP representation with 50% probability thermal ellipsoids.

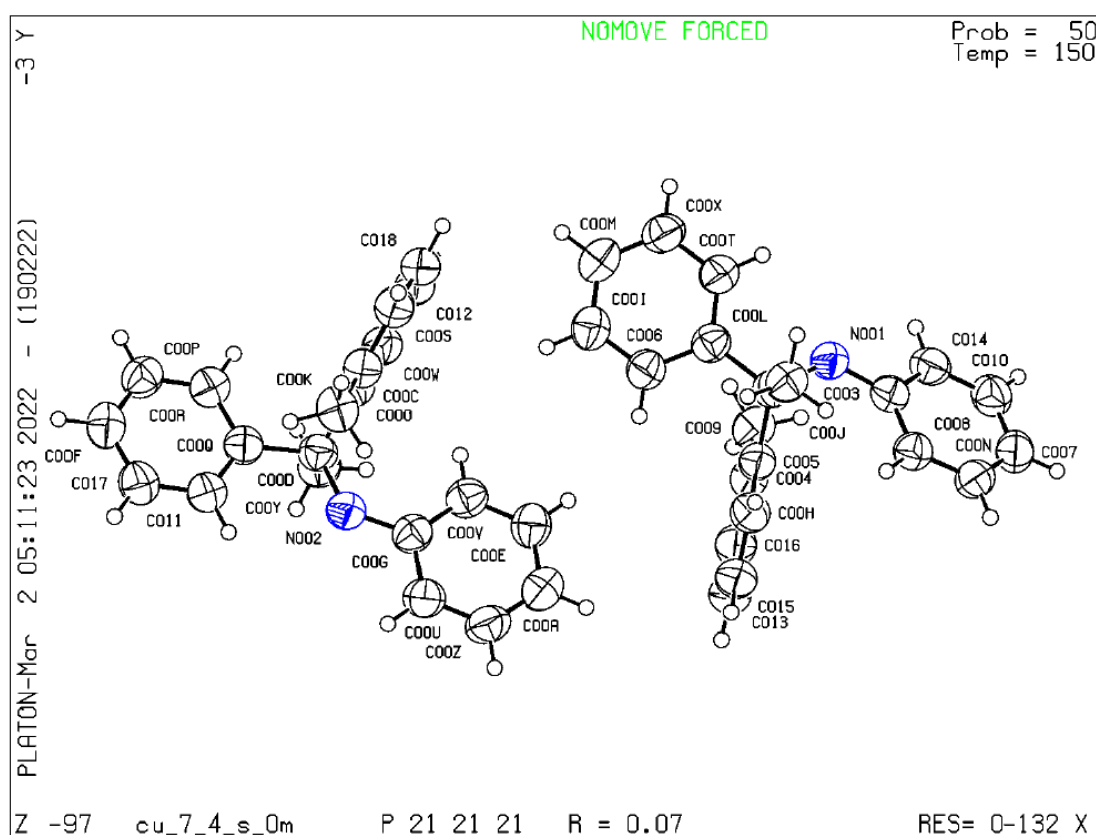

X-Ray structure of (*S*)-**1a** (with CCDC number 2240486)

Single crystallography data for (S)-**1a**

---

|                                             |                                                               |
|---------------------------------------------|---------------------------------------------------------------|
| Identification code                         | jqw_7_78_s_0m                                                 |
| Empirical formula                           | C <sub>21</sub> H <sub>21</sub> N                             |
| Formula weight                              | 287.39                                                        |
| Temperature/K                               | 150.0                                                         |
| Crystal system                              | orthorhombic                                                  |
| Space group                                 | P2 <sub>1</sub> 2 <sub>1</sub> 2 <sub>1</sub>                 |
| a/Å                                         | 11.3037(5)                                                    |
| b/Å                                         | 14.5967(7)                                                    |
| c/Å                                         | 19.5380(10)                                                   |
| α/°                                         | 90                                                            |
| β/°                                         | 90                                                            |
| γ/°                                         | 90                                                            |
| Volume/Å <sup>3</sup>                       | 3223.7(3)                                                     |
| Z                                           | 8                                                             |
| ρ <sub>calc</sub> /cm <sup>3</sup>          | 1.184                                                         |
| μ/mm <sup>-1</sup>                          | 0.328                                                         |
| F(000)                                      | 1232.0                                                        |
| Crystal size/mm <sup>3</sup>                | 0.15 × 0.15 × 0.15                                            |
| Radiation                                   | GaKα (λ = 1.34138)                                            |
| 2Θ range for data collection/°              | 6.576 to 118.63                                               |
| Index ranges                                | -14 ≤ h ≤ 13, -18 ≤ k ≤ 18, -17 ≤ l ≤ 25                      |
| Reflections collected                       | 41671                                                         |
| Independent reflections                     | 7042 [R <sub>int</sub> = 0.0555, R <sub>sigma</sub> = 0.0400] |
| Data/restraints/parameters                  | 7042/6/401                                                    |
| Goodness-of-fit on F <sup>2</sup>           | 1.033                                                         |
| Final R indexes [I ≥ 2σ (I)]                | R <sub>1</sub> = 0.0387, wR <sub>2</sub> = 0.0895             |
| Final R indexes [all data]                  | R <sub>1</sub> = 0.0471, wR <sub>2</sub> = 0.0932             |
| Largest diff. peak/hole / e Å <sup>-3</sup> | 0.25/-0.25                                                    |
| Flack parameter                             | 0.0(3)                                                        |

---

## HPLC traces:

(*S*)-*N*-(1-phenyl-1-(*o*-tolyl)ethyl)aniline ((*S*)-**1a**)

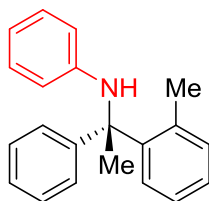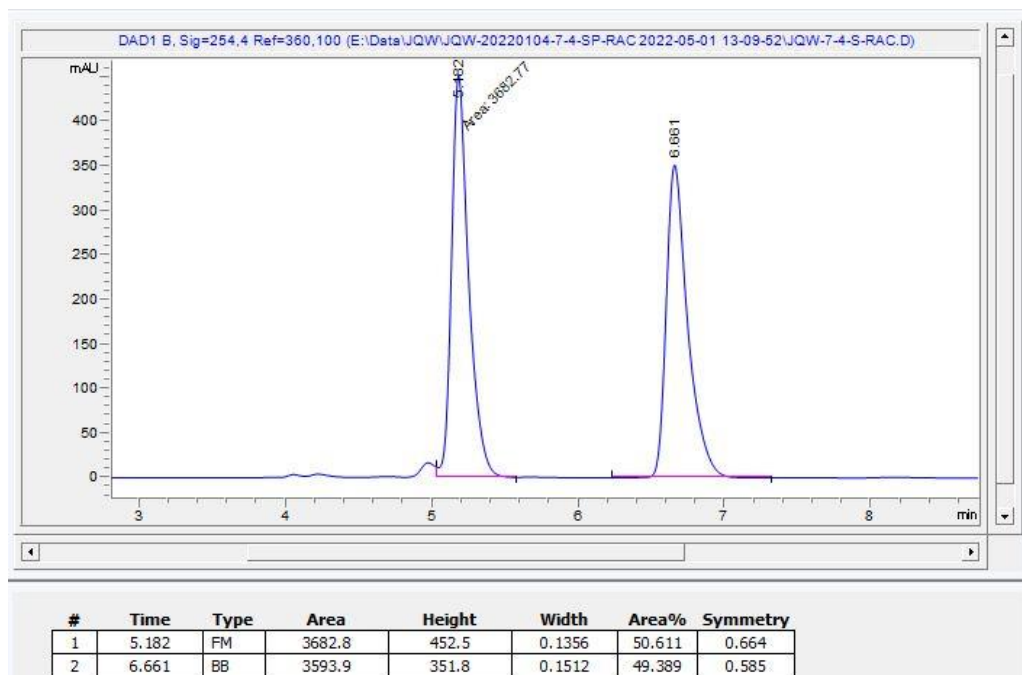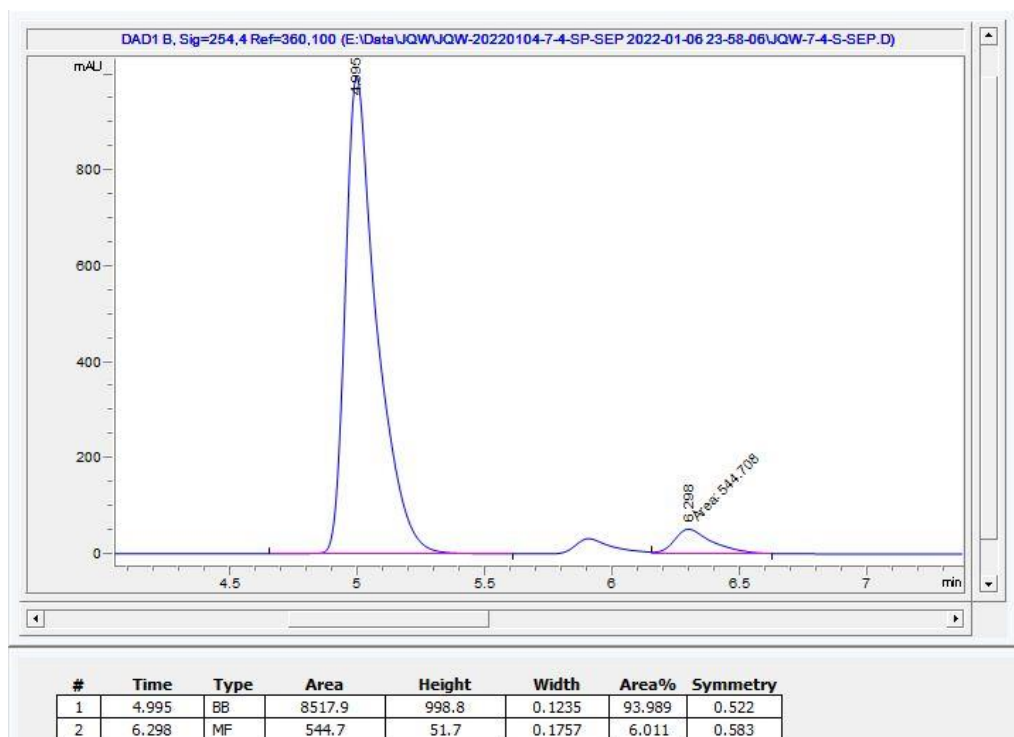

Dibenzyl(R)-1-(4-((1-phenyl-1-(*o*-tolyl)ethyl)amino)phenyl)hydrazine-1,2-dicarboxylat (**3a**)

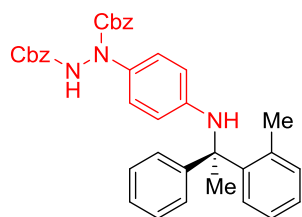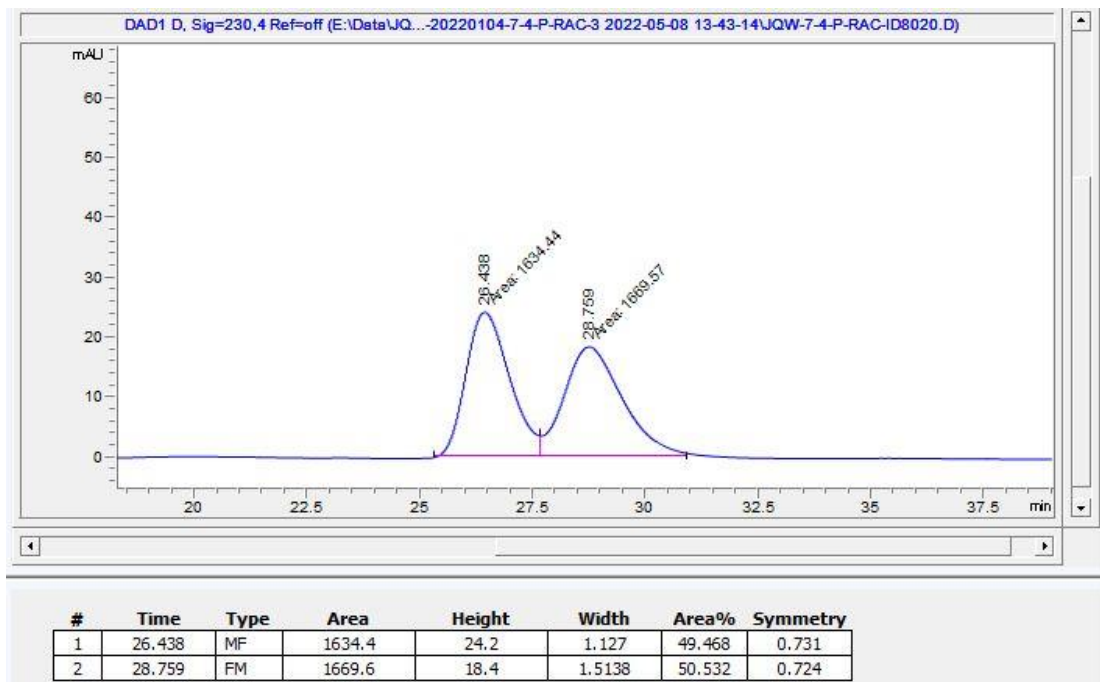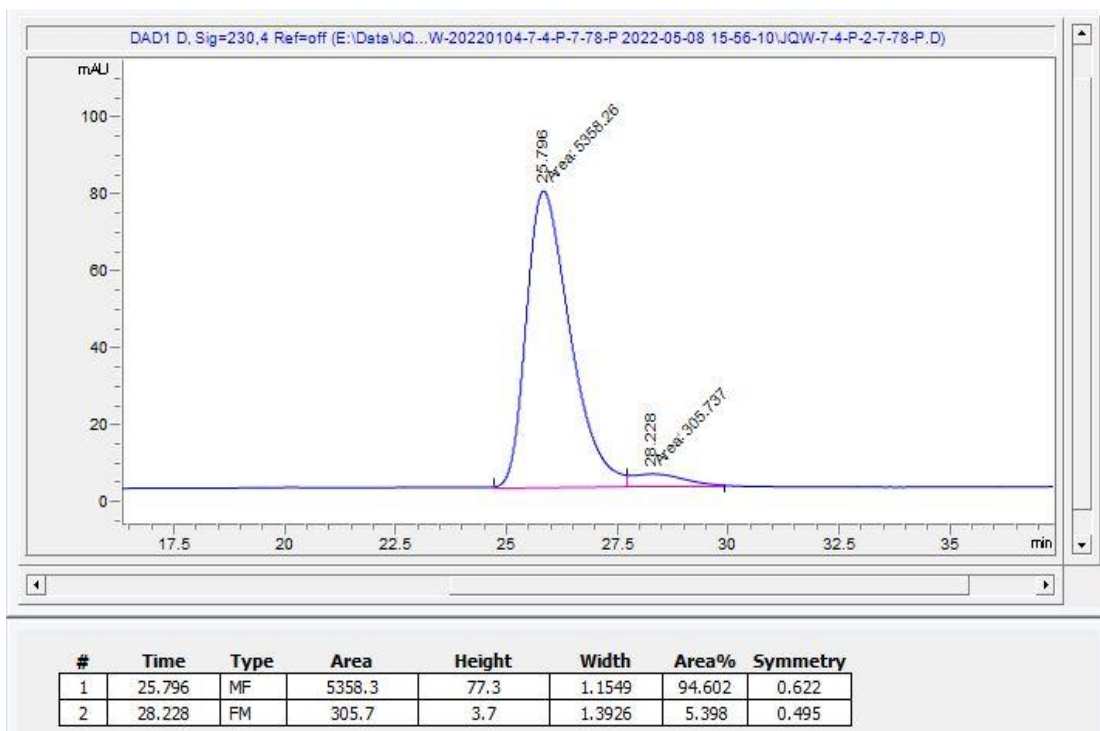

(S)-3-methyl-N-(1-phenyl-1-(o-tolyl)ethyl)aniline ((S)-**1b**)

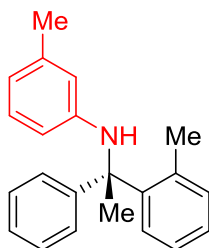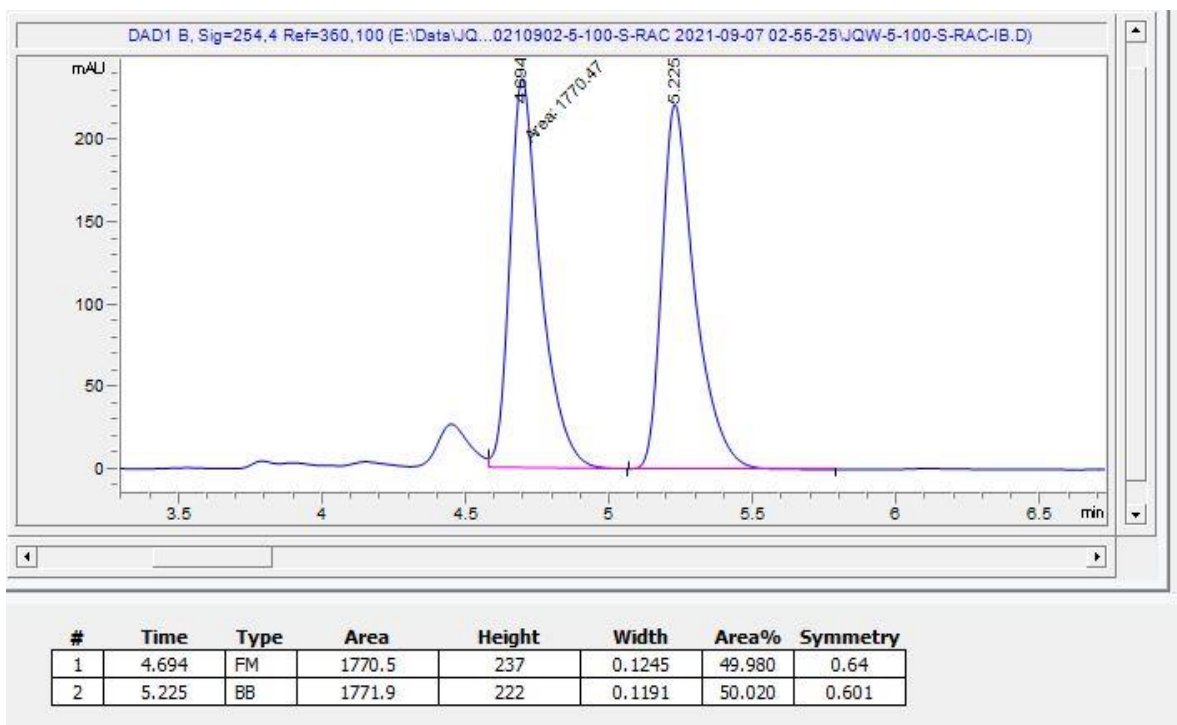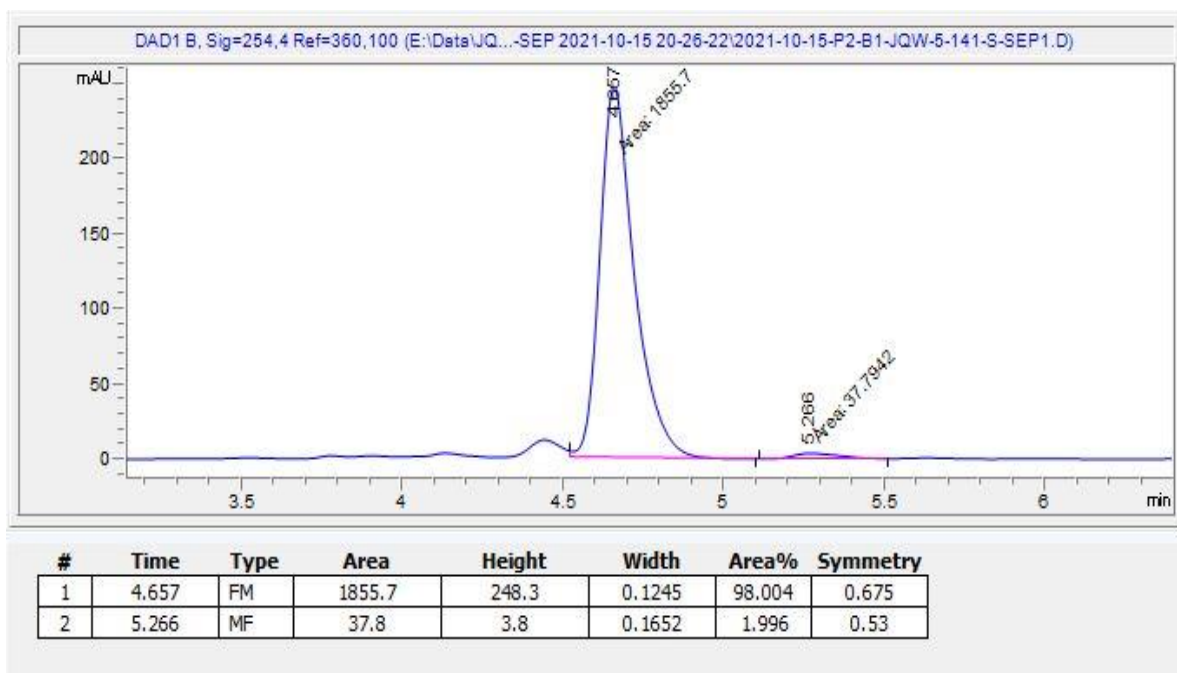



Dibenzyl(*R*)-1-(2-methyl-4-((1-phenyl-1-(*o*-tolyl)ethyl)amino)phenyl)hydrazine-1,2-dicarboxylate (**3b**)

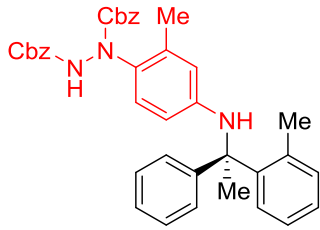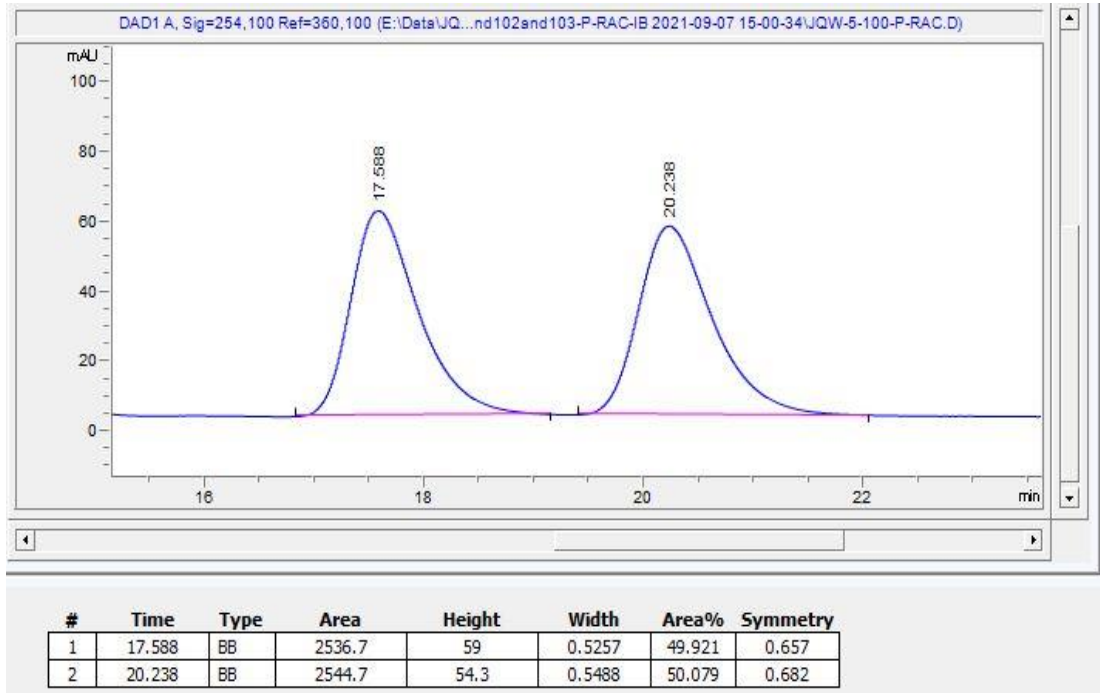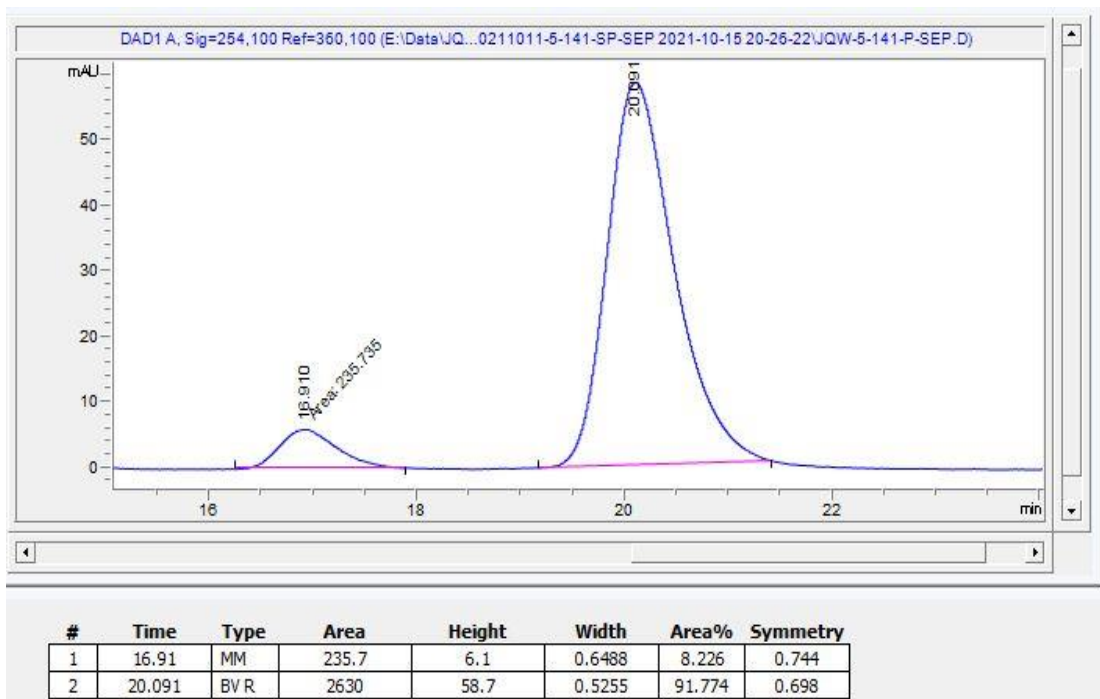

(S)-3-methoxy-N-(1-phenyl-1-(o-tolyl)ethyl)aniline ((S)-1c)

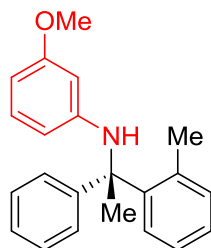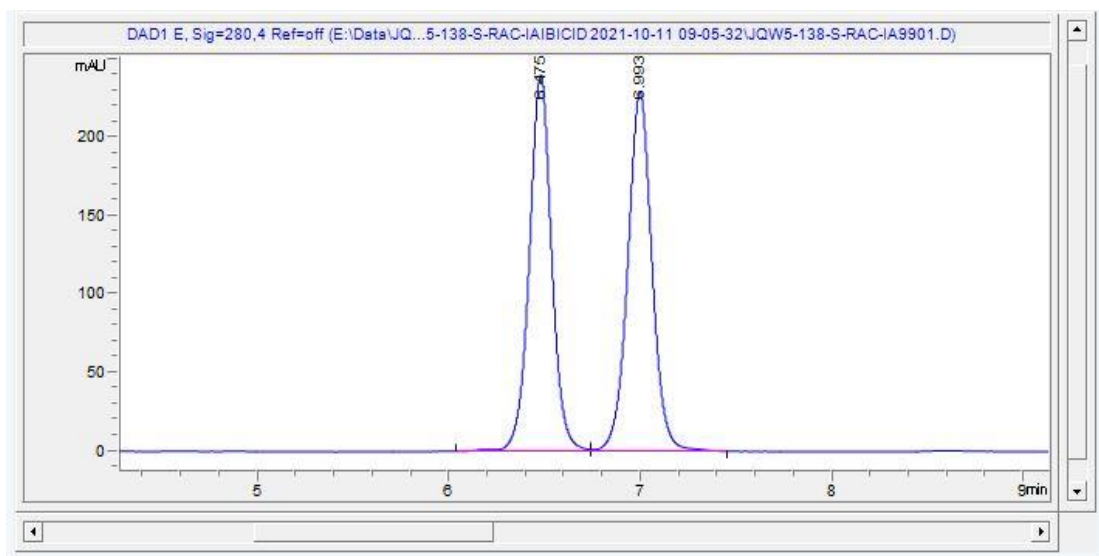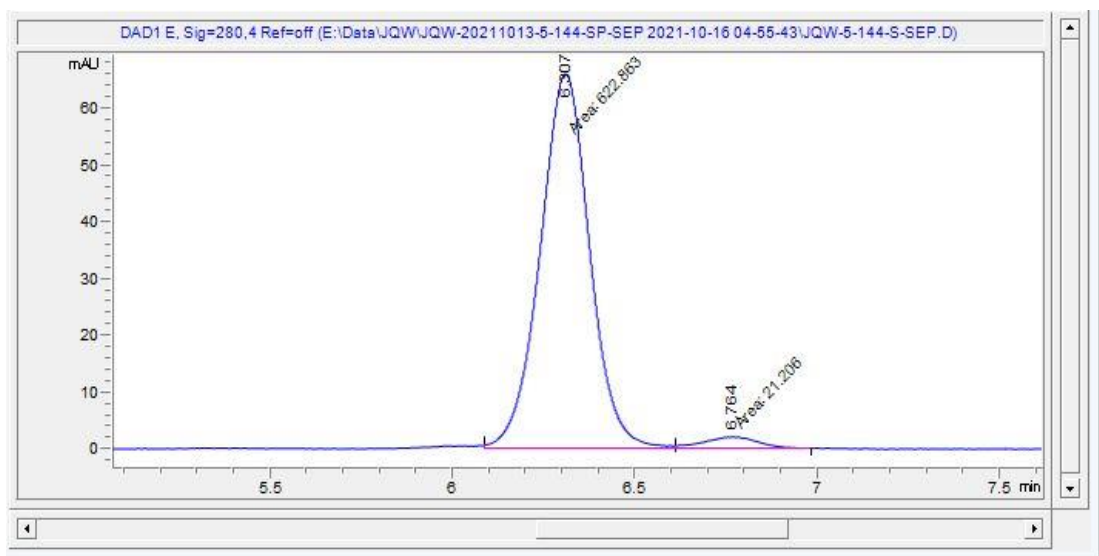

Dibenzyl-(*R*)-1-(2-methoxy-4-((1-phenyl-1-(*o*-tolyl)ethyl)amino)phenyl)hydrazine-1,2-dicarbonyl-ate (**3c**)

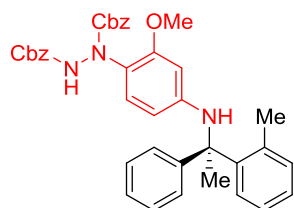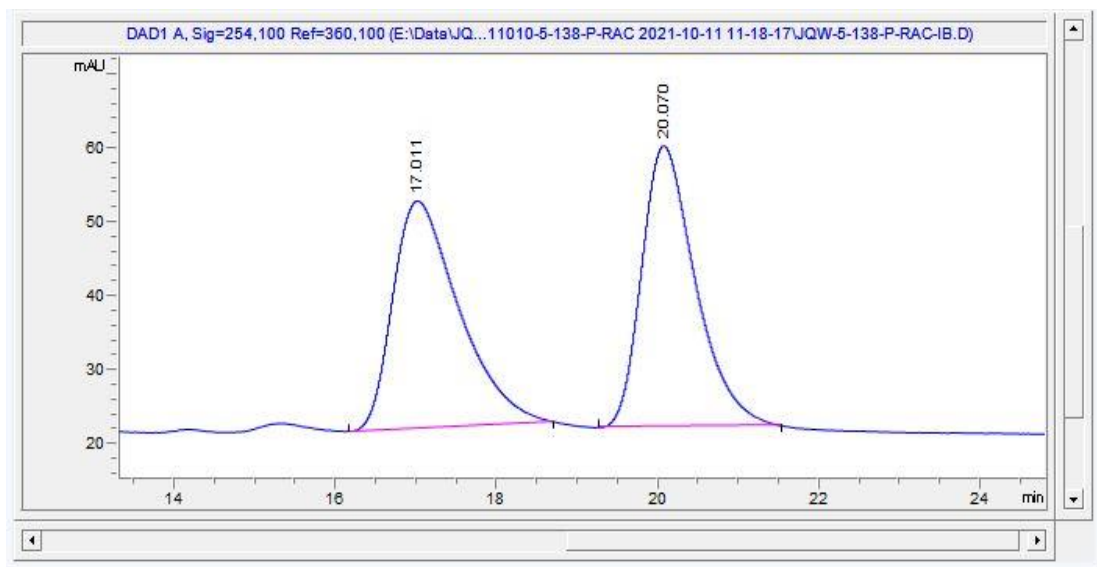

| # | Time   | Type | Area   | Height | Width  | Area%  | Symmetry |
|---|--------|------|--------|--------|--------|--------|----------|
| 1 | 17.011 | BB   | 1749.7 | 30.7   | 0.6677 | 49.806 | 0.573    |
| 2 | 20.07  | BV R | 1763.3 | 38     | 0.5433 | 50.194 | 0.667    |

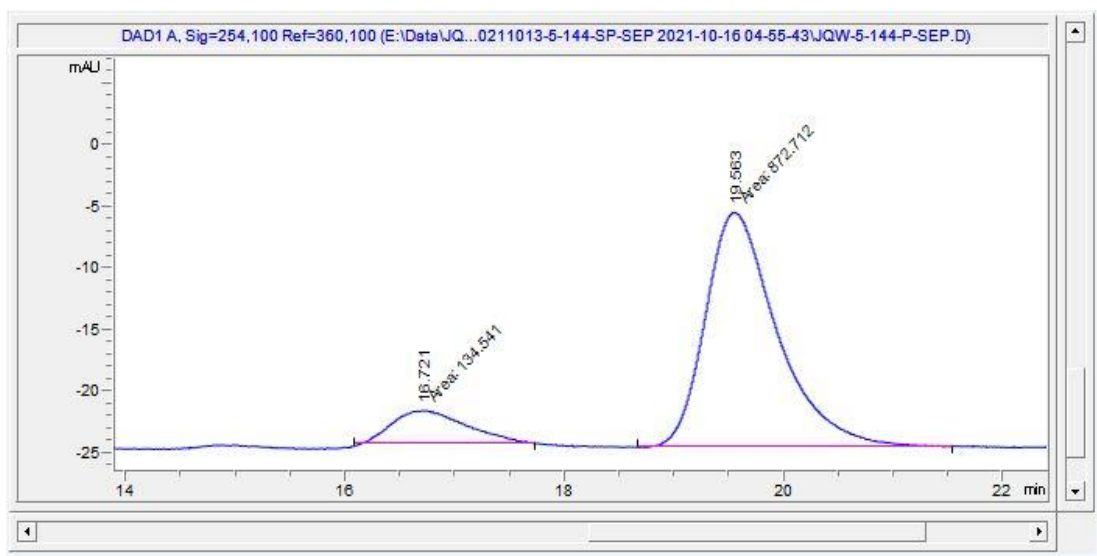

| # | Time   | Type | Area  | Height | Width  | Area%  | Symmetry |
|---|--------|------|-------|--------|--------|--------|----------|
| 1 | 16.721 | MM   | 134.5 | 2.8    | 0.8056 | 13.357 | 0.722    |
| 2 | 19.563 | MM   | 872.7 | 19.1   | 0.7614 | 86.643 | 0.698    |

(S)-3-chloro-N-(1-phenyl-1-(o-tolyl)ethyl)aniline ((S)-**1d**)

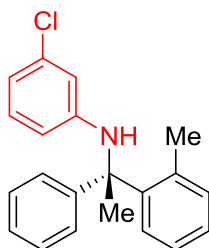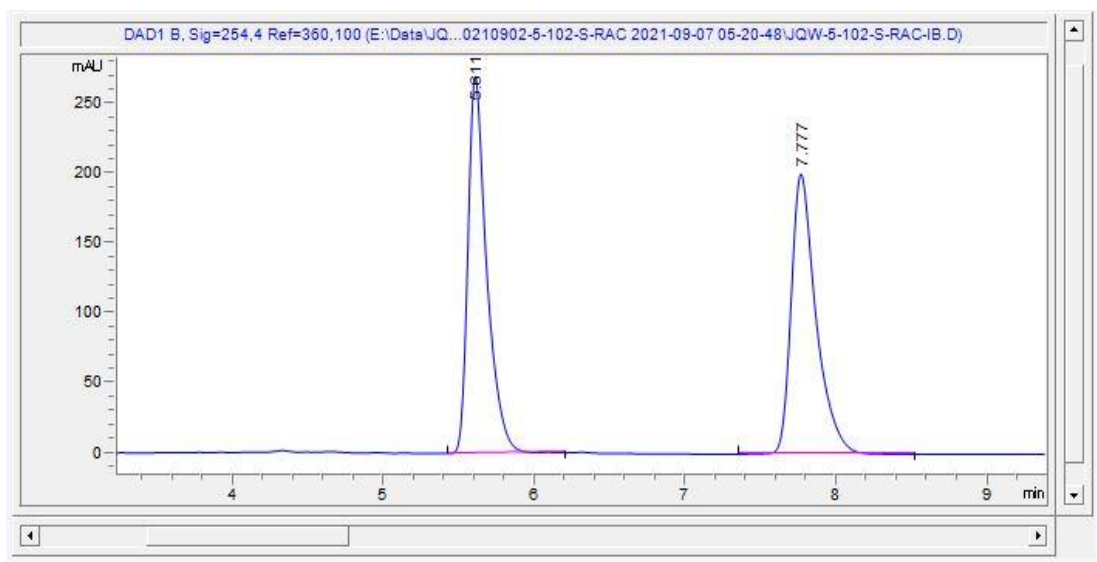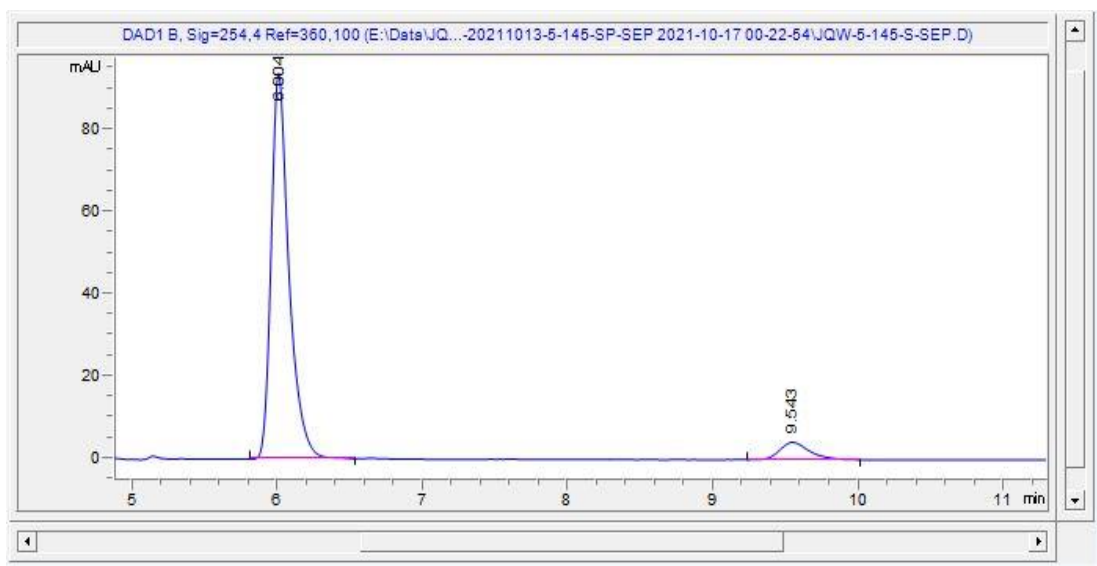

Dibenzyl-(*R*)-1-(2-chloro-4-((1-phenyl-1-(*o*-tolyl)ethyl)amino)phenyl)hydrazine-1,2-dicarboxylate (**3d**)

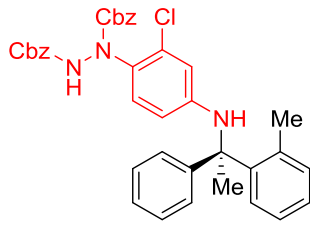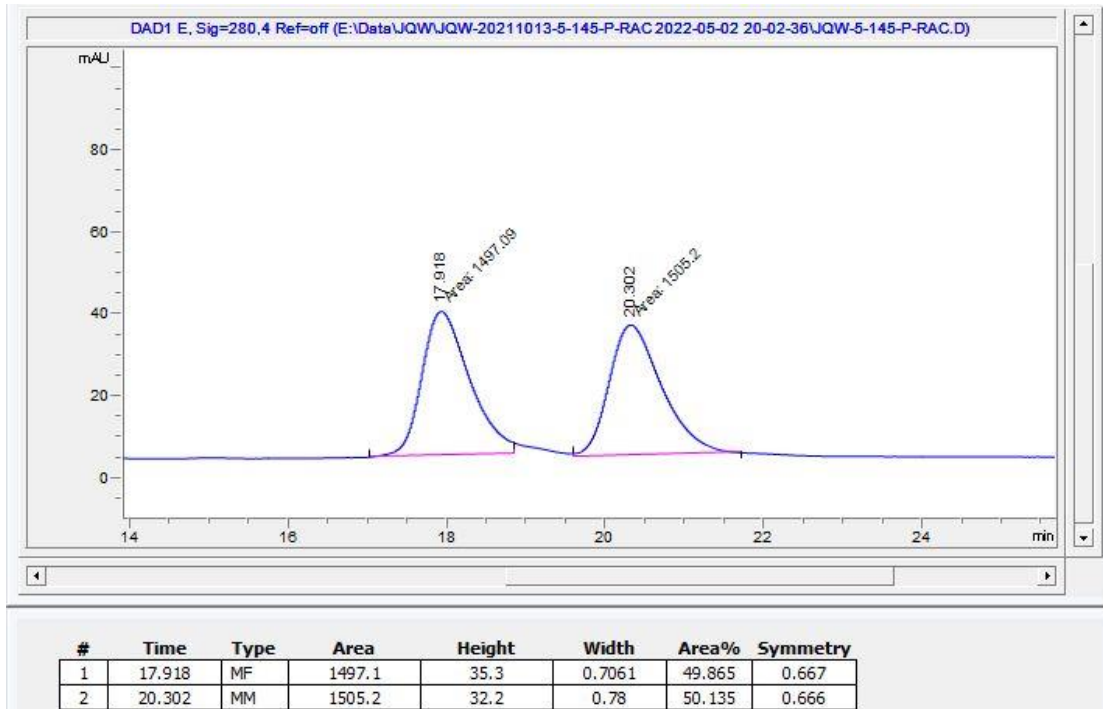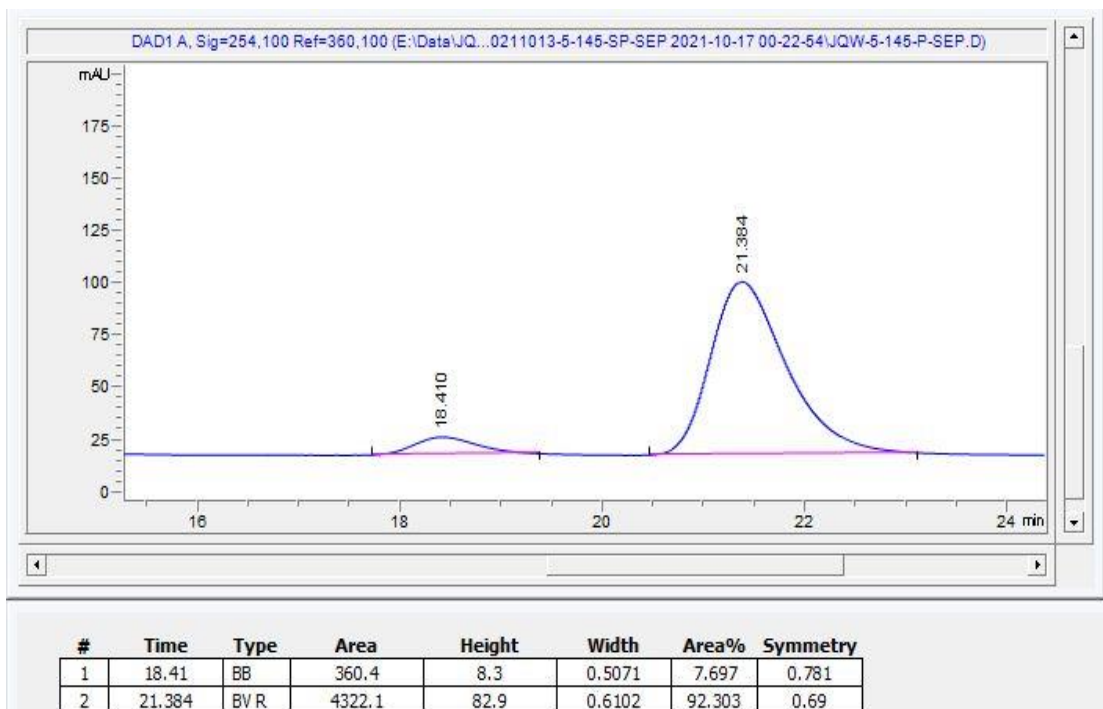

(S)-3-fluoro-N-(1-phenyl-1-(o-tolyl)ethyl)aniline ((S)-1e)

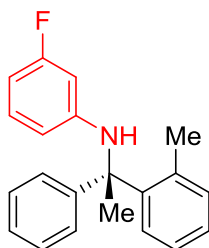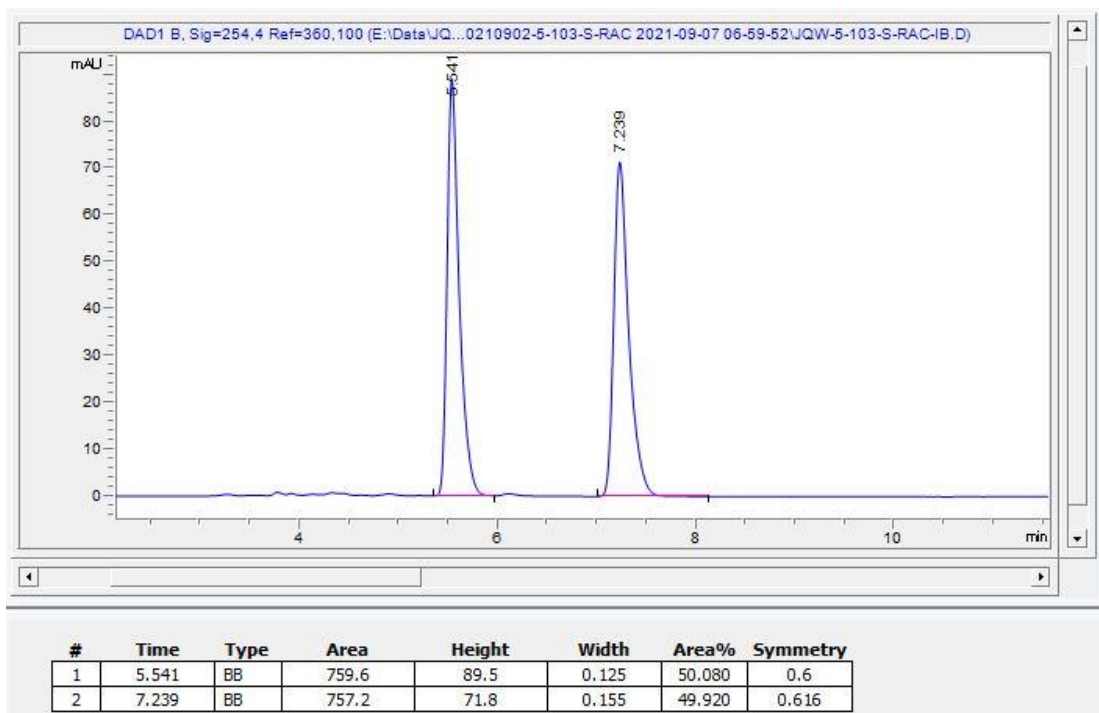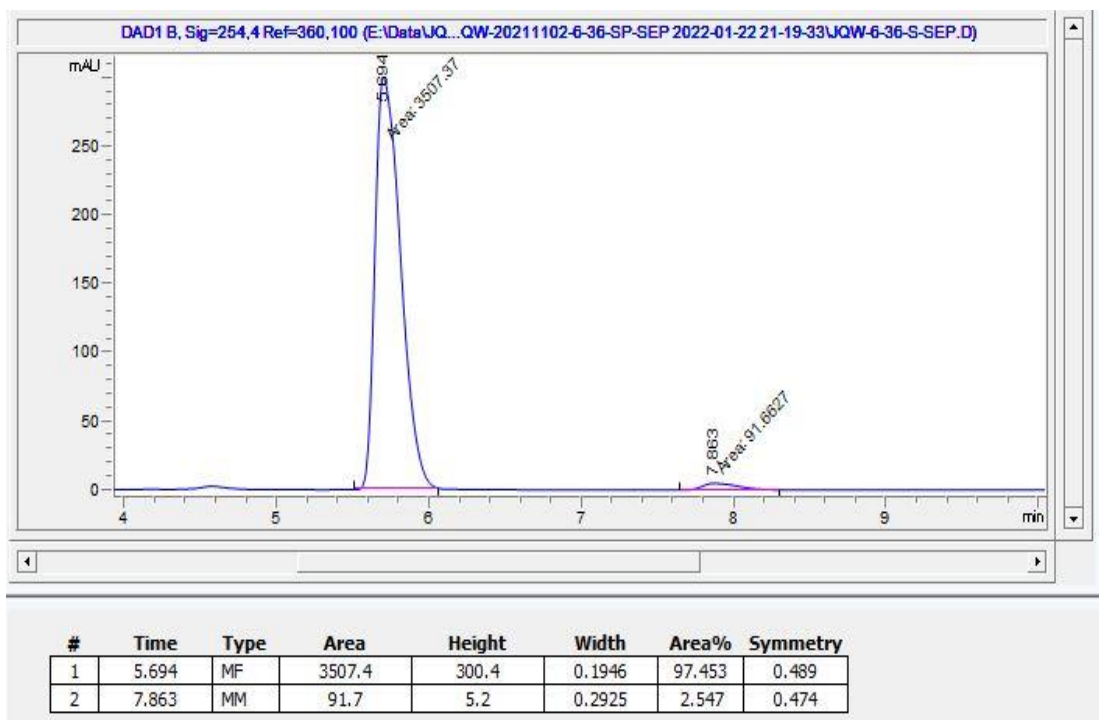

dibenzyl-(*R*)-1-(2-fluoro-4-((1-phenyl-1-(*o*-tolyl)ethyl)amino)phenyl)hydrazine-1,2-dicarboxylate (**3e**)

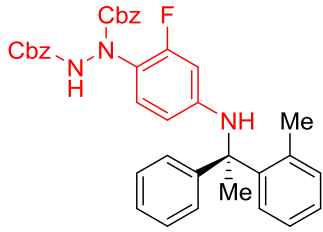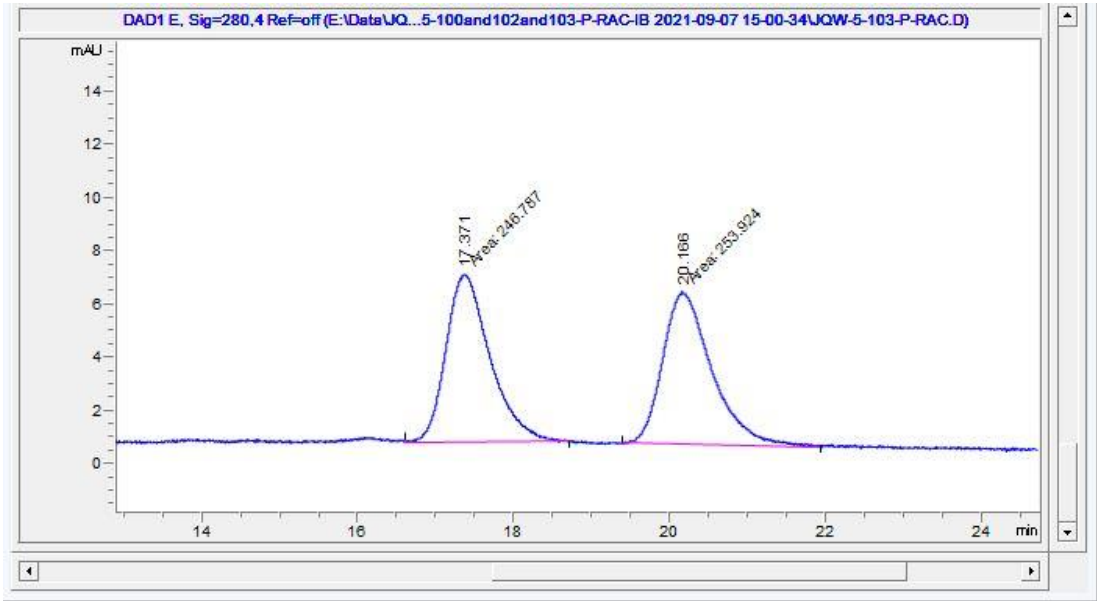

| # | Time   | Type | Area  | Height | Width  | Area%  | Symmetry |
|---|--------|------|-------|--------|--------|--------|----------|
| 1 | 17.371 | MM   | 246.8 | 6.3    | 0.6526 | 49.287 | 0.7      |
| 2 | 20.166 | MM   | 253.9 | 5.7    | 0.7365 | 50.713 | 0.625    |

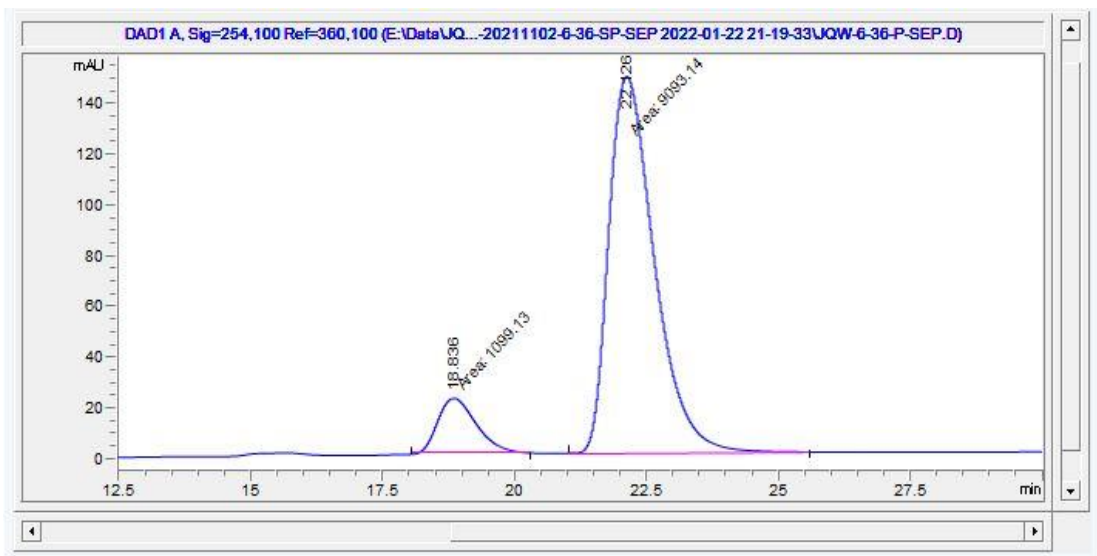

| # | Time   | Type | Area   | Height | Width  | Area%  | Symmetry |
|---|--------|------|--------|--------|--------|--------|----------|
| 1 | 18.836 | MM   | 1099.1 | 21.8   | 0.8407 | 10.784 | 0.677    |
| 2 | 22.126 | MM   | 9093.1 | 149.3  | 1.0153 | 89.216 | 0.627    |

(S)-3,5-dimethyl-N-(1-phenyl-1-(o-tolyl)ethyl)aniline ((S)-1f)

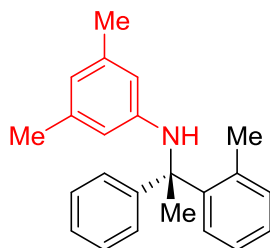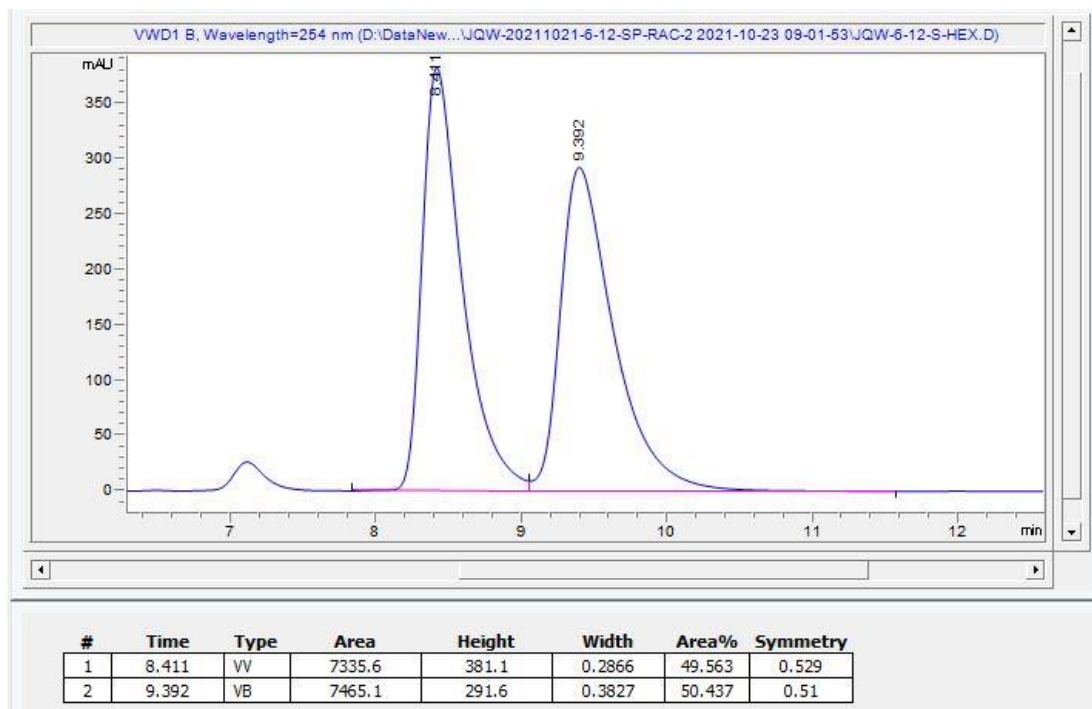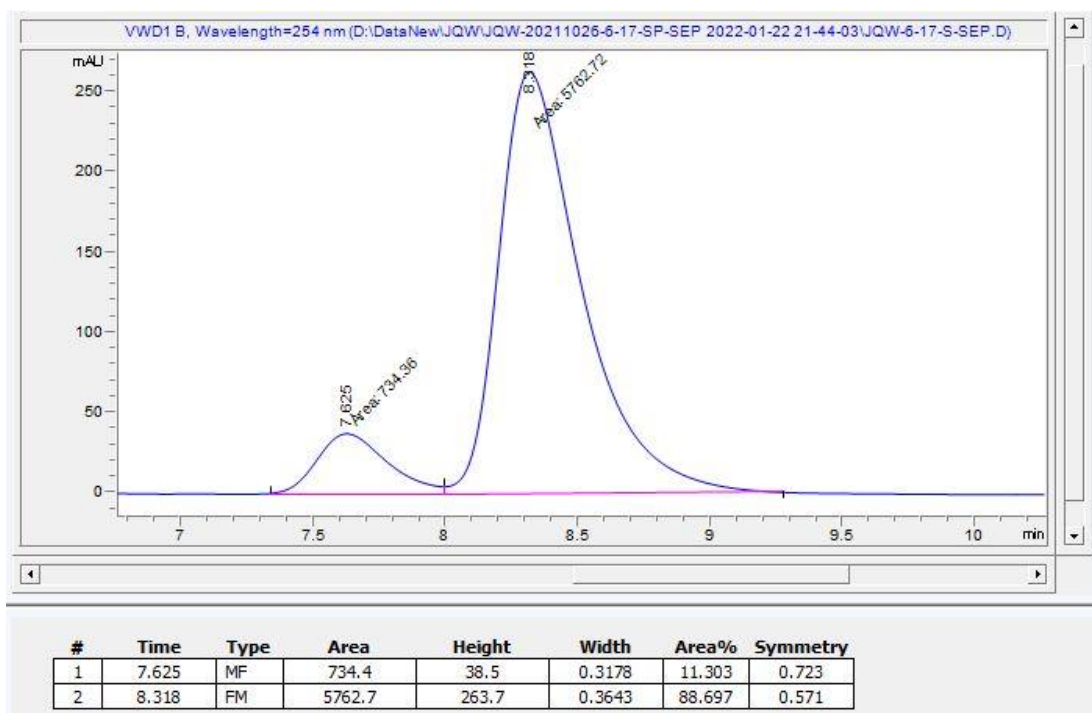



Dibenzyl-(*R*)-1-(2,6-dimethyl-4-((1-phenyl-1-(*o*-tolyl)ethyl)amino)phenyl)hydrazine-1,2-dicarboxylate (**3f**)

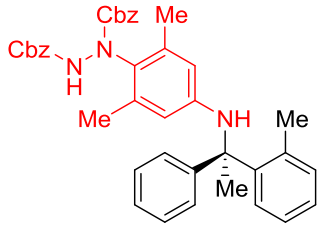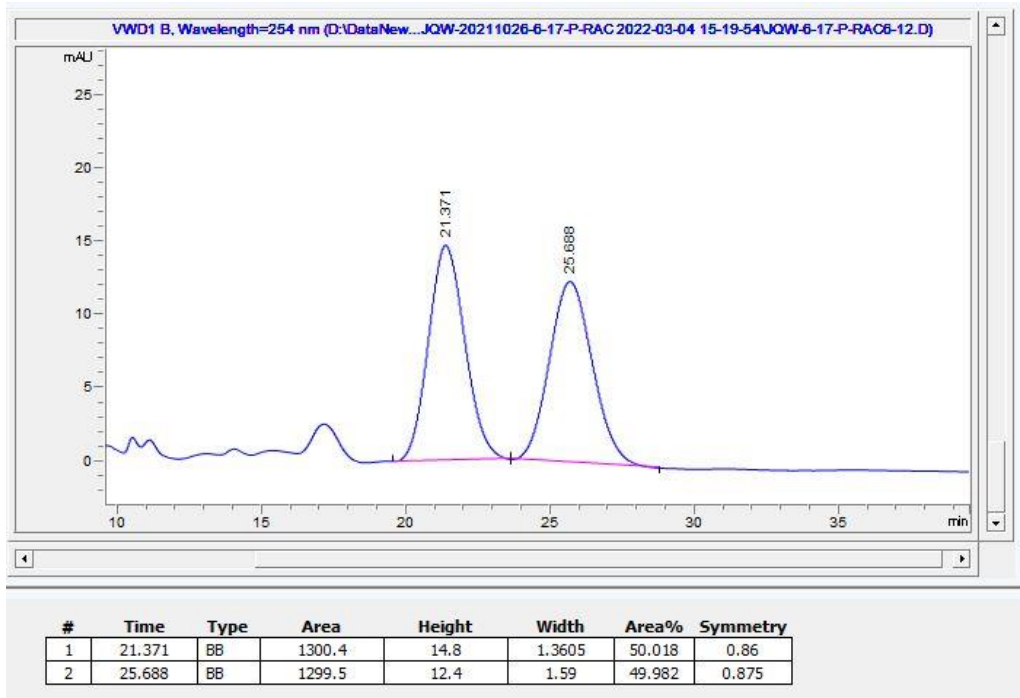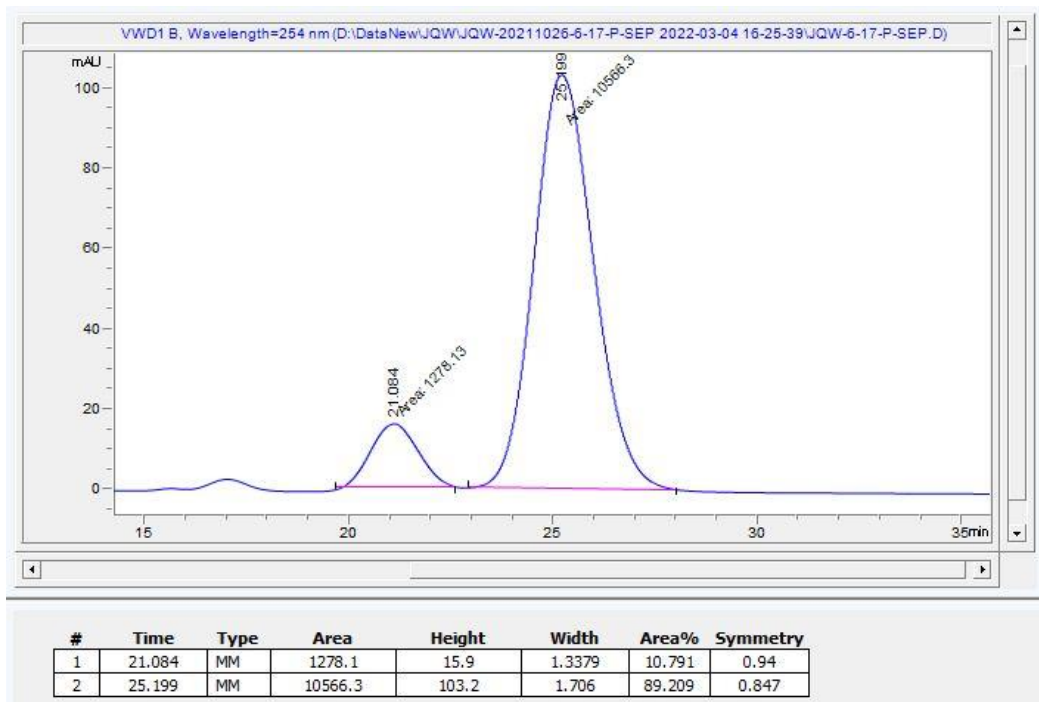

(S)-N-(1-(o-tolyl)-1-(p-tolyl)ethyl)aniline ((S)-1g)

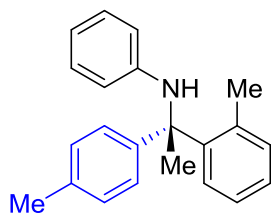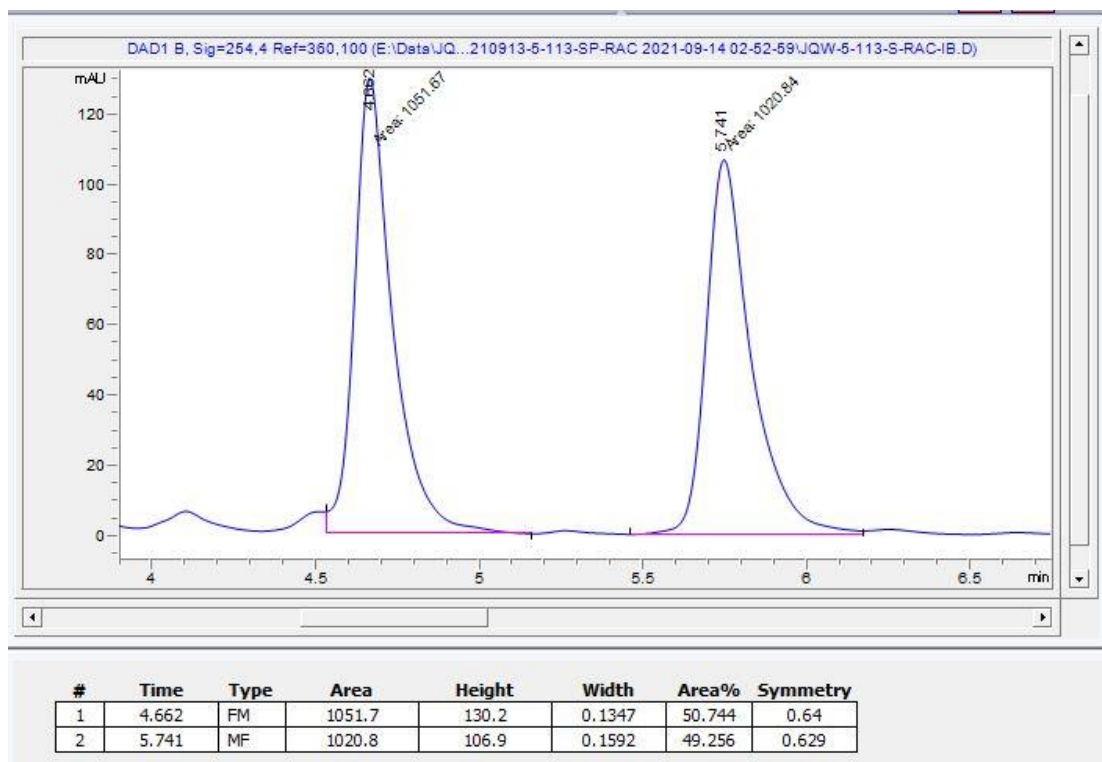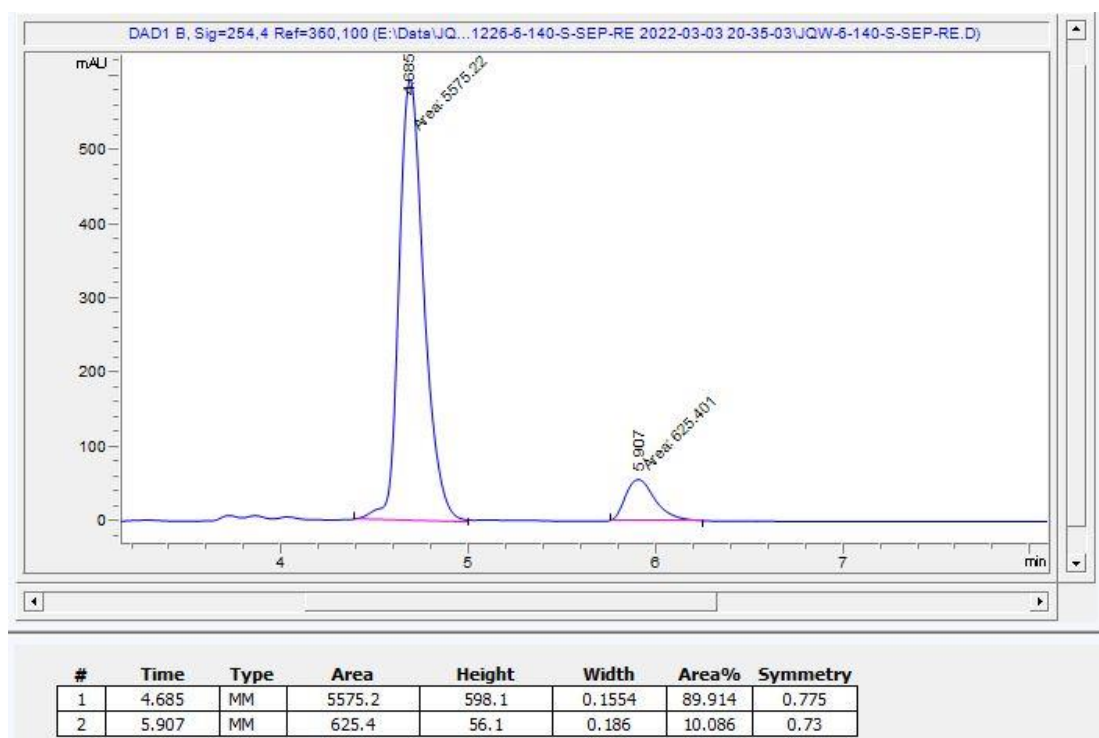

Dibenzyl (R)-1-(4-((1-(*o*-tolyl)-1-(*p*-tolyl)ethyl)amino)phenyl)hydrazine-1,2-dicarboxylate

(3g)

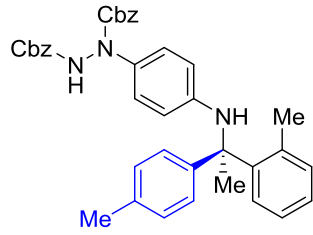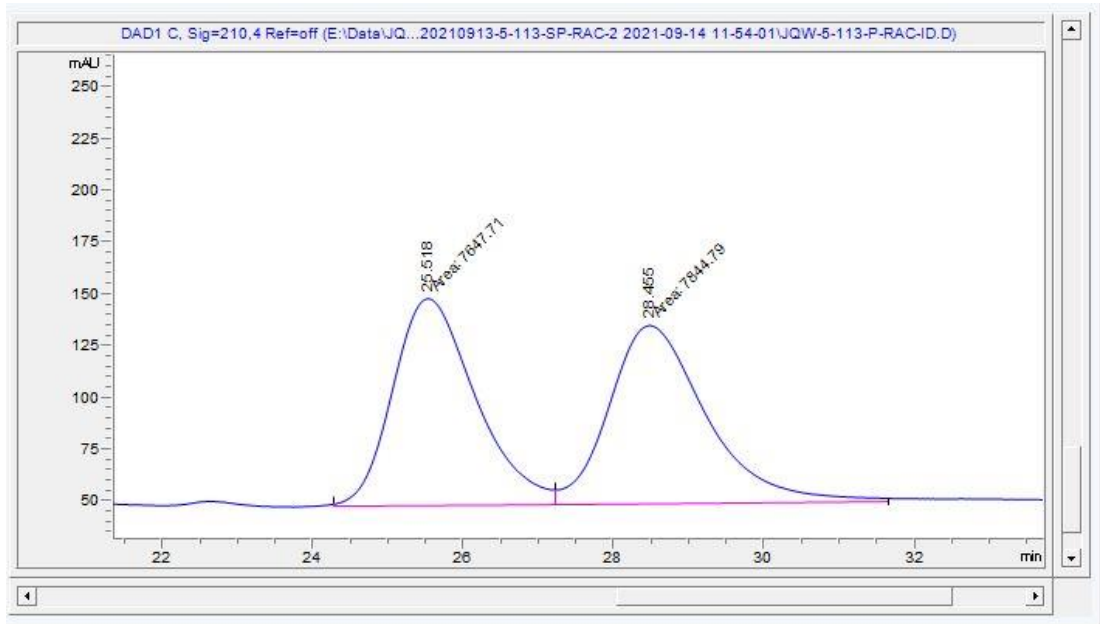

| # | Time   | Type | Area   | Height | Width  | Area%  | Symmetry |
|---|--------|------|--------|--------|--------|--------|----------|
| 1 | 25.518 | MF   | 7647.7 | 99.9   | 1.2757 | 49.364 | 0        |
| 2 | 28.455 | FM   | 7844.8 | 86.4   | 1.5131 | 50.636 | 0.683    |

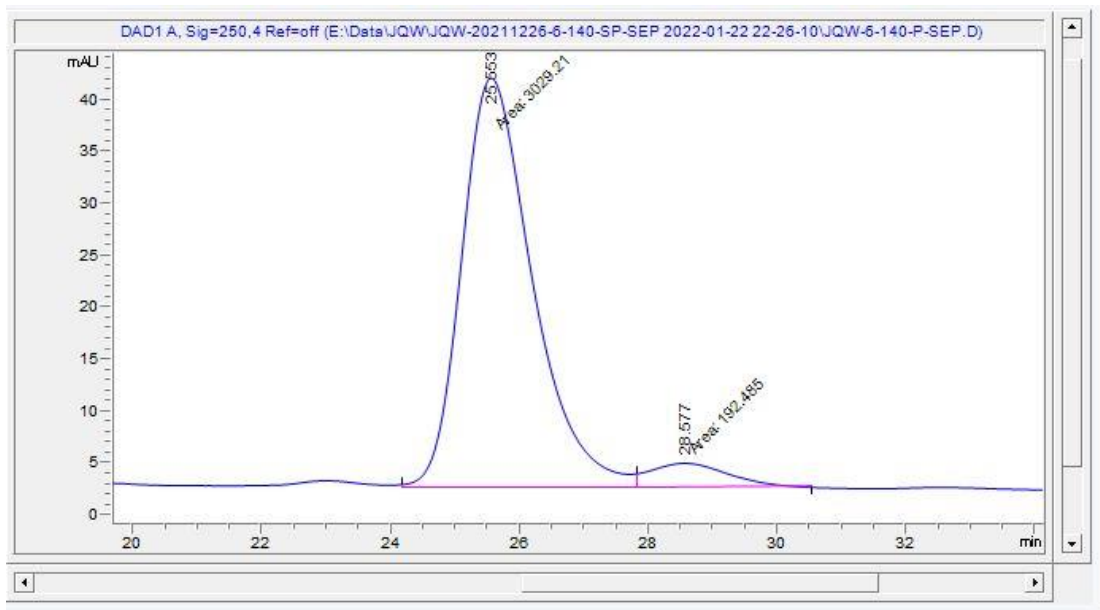

| # | Time   | Type | Area   | Height | Width  | Area%  | Symmetry |
|---|--------|------|--------|--------|--------|--------|----------|
| 1 | 25.553 | MF   | 3029.2 | 39.5   | 1.2769 | 94.025 | 0        |
| 2 | 28.577 | FM   | 192.5  | 2.3    | 1.3832 | 5.975  | 0.806    |

(S)-N-(1-(4-chlorophenyl)-1-(o-tolyl)ethyl)aniline ((S)-**1h**)

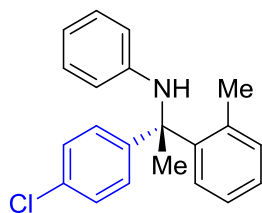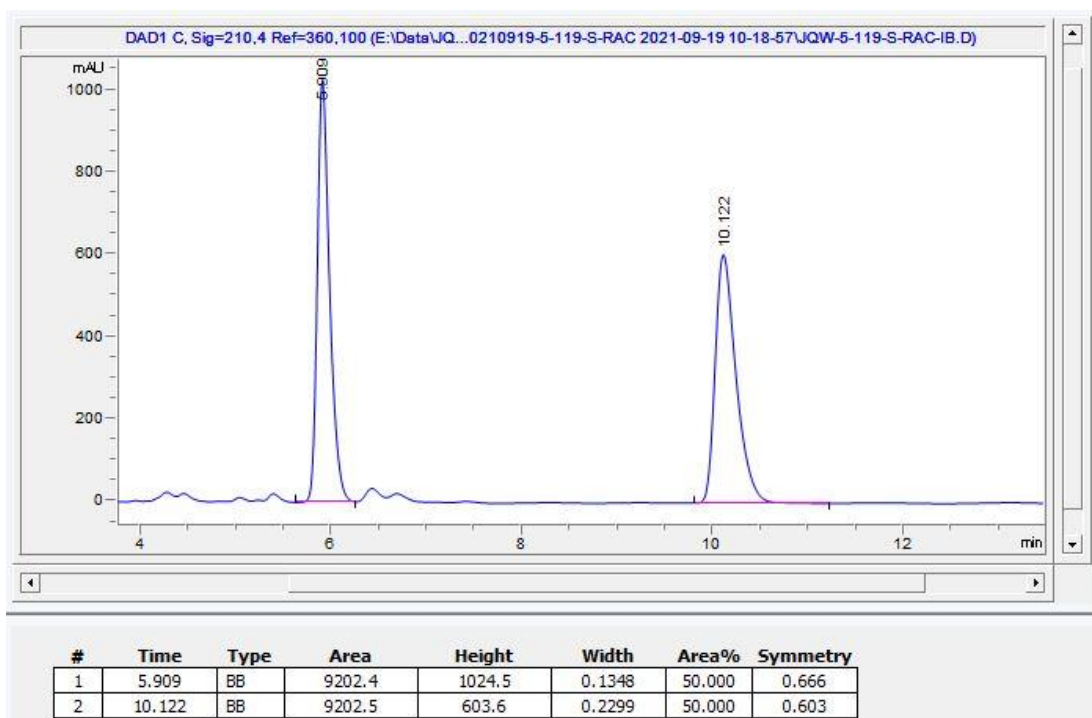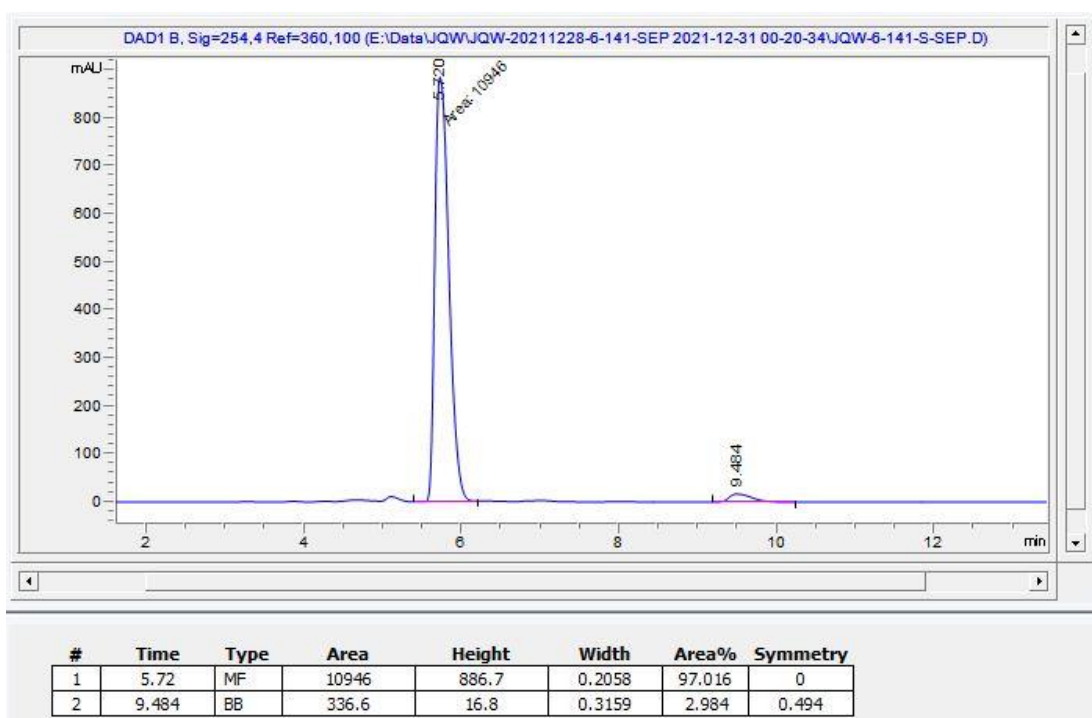

Dibenzyl-(*R*)-1-(4-((1-(4-chlorophenyl)-1-(*o*-tolyl)ethyl)amino)phenyl)hydrazine-1,2-dicarboxylate (**3h**)

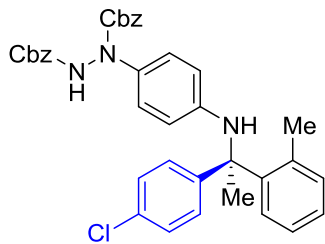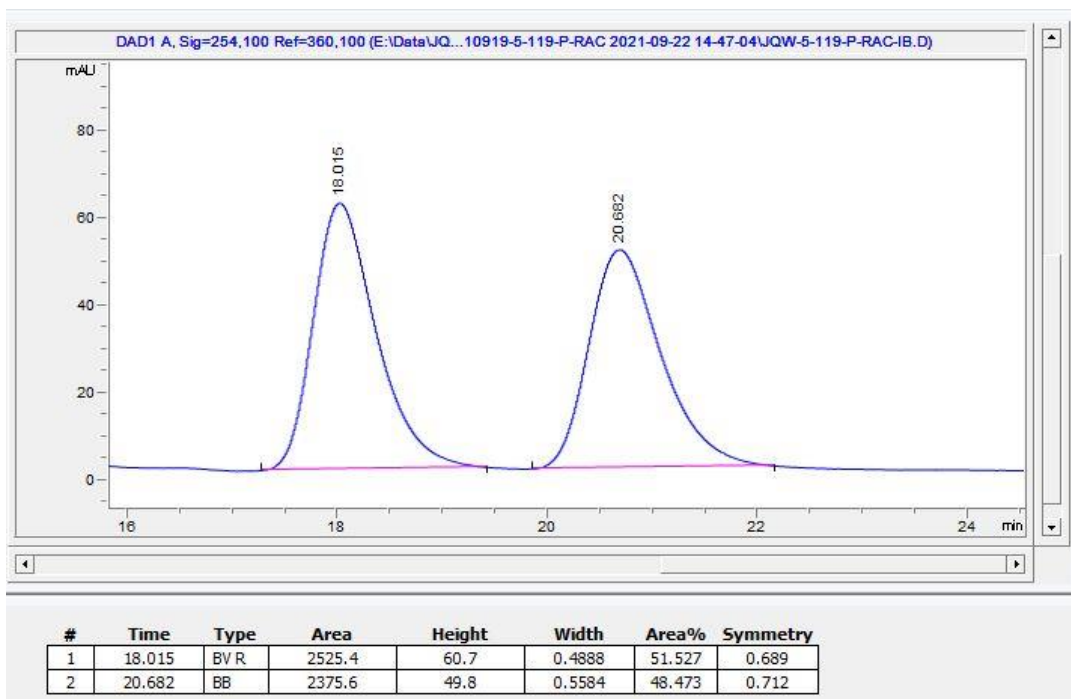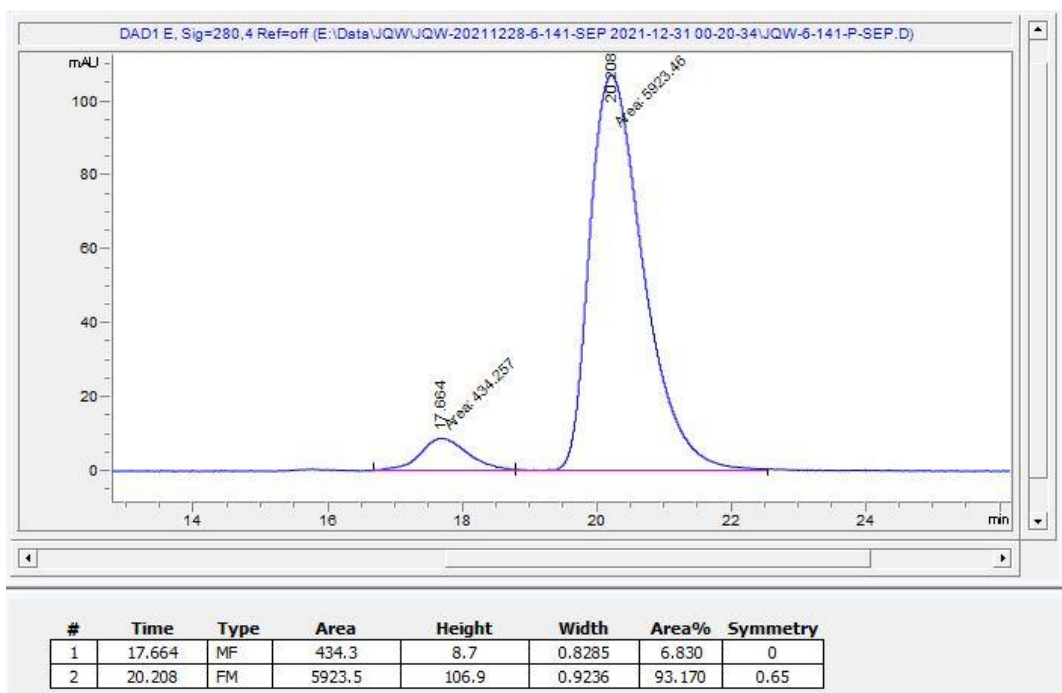

(S)-N-(1-(4-methoxyphenyl)-1-(o-tolyl)ethyl)aniline ((S)-**1i**)

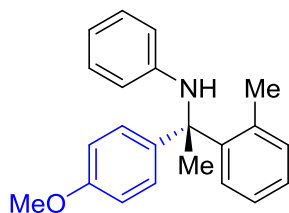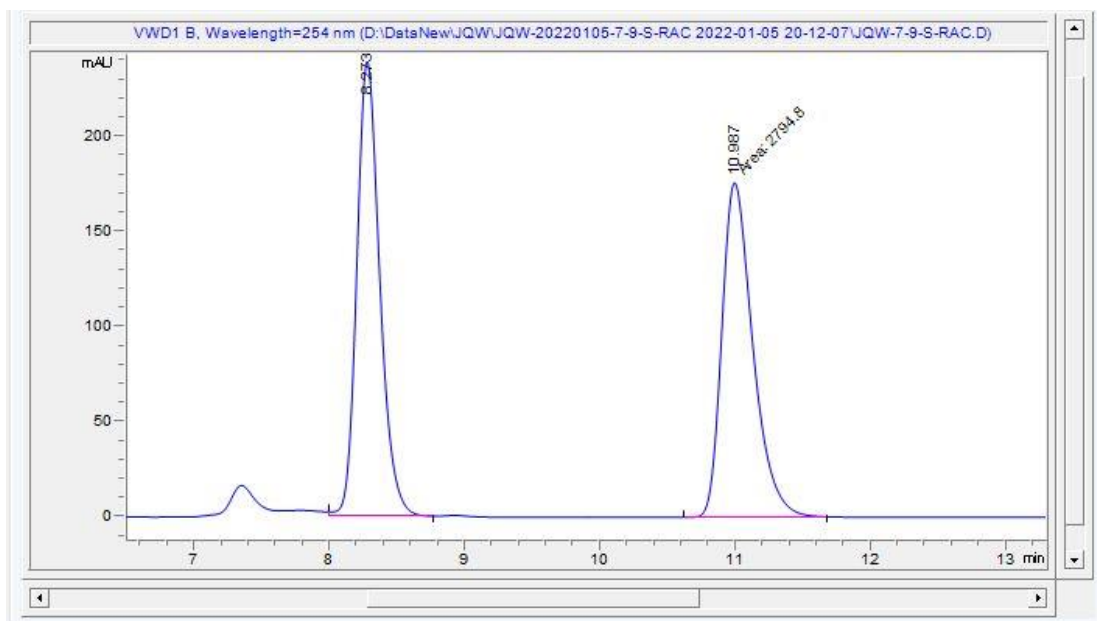

| # | Time   | Type | Area   | Height | Width  | Area%  | Symmetry |
|---|--------|------|--------|--------|--------|--------|----------|
| 1 | 8.273  | VB   | 2817   | 238.7  | 0.1817 | 50.198 | 0.779    |
| 2 | 10.987 | MF   | 2794.8 | 175.5  | 0.2654 | 49.802 | 0.67     |

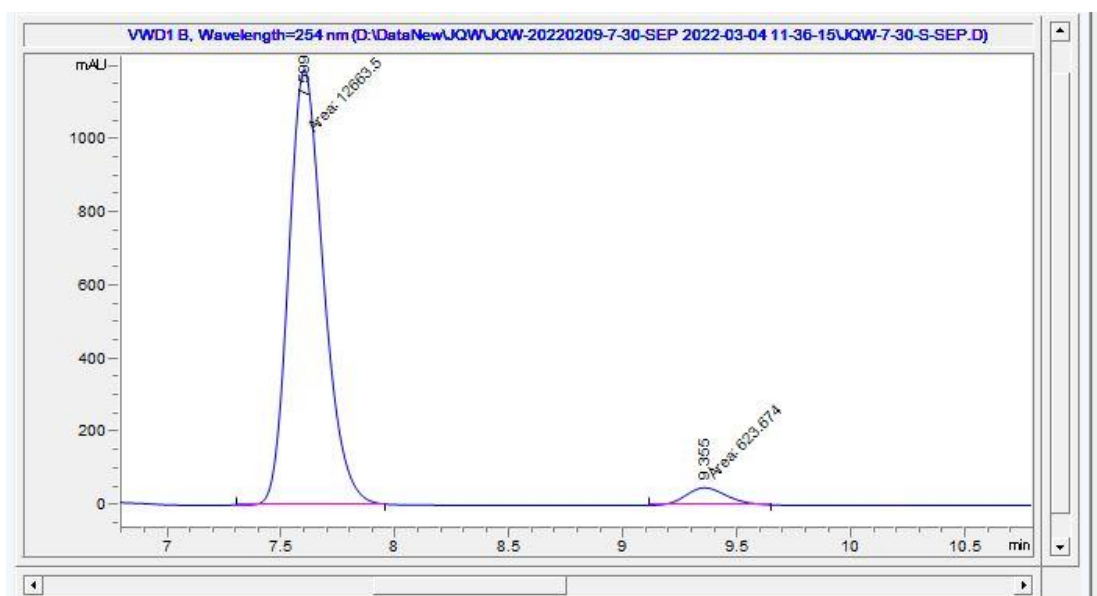

| # | Time  | Type | Area    | Height | Width  | Area%  | Symmetry |
|---|-------|------|---------|--------|--------|--------|----------|
| 1 | 7.599 | FM   | 12663.5 | 1190.7 | 0.1772 | 95.306 | 0.777    |
| 2 | 9.355 | FM   | 623.7   | 48.2   | 0.2157 | 4.694  | 0.8      |

Dibenzyl-(*R*)-1-(4-((1-(4-methoxyphenyl)-1-(*o*-tolyl)ethyl)amino)phenyl)hydrazine-1,2-dicarboxylate (**3i**)

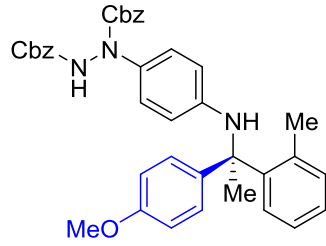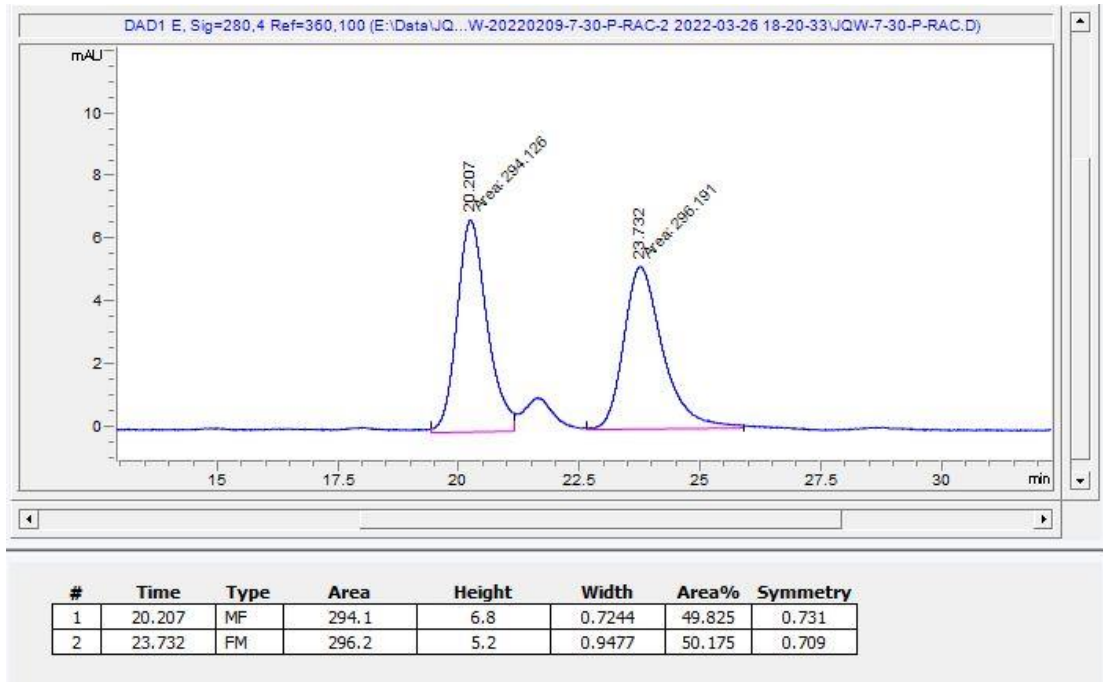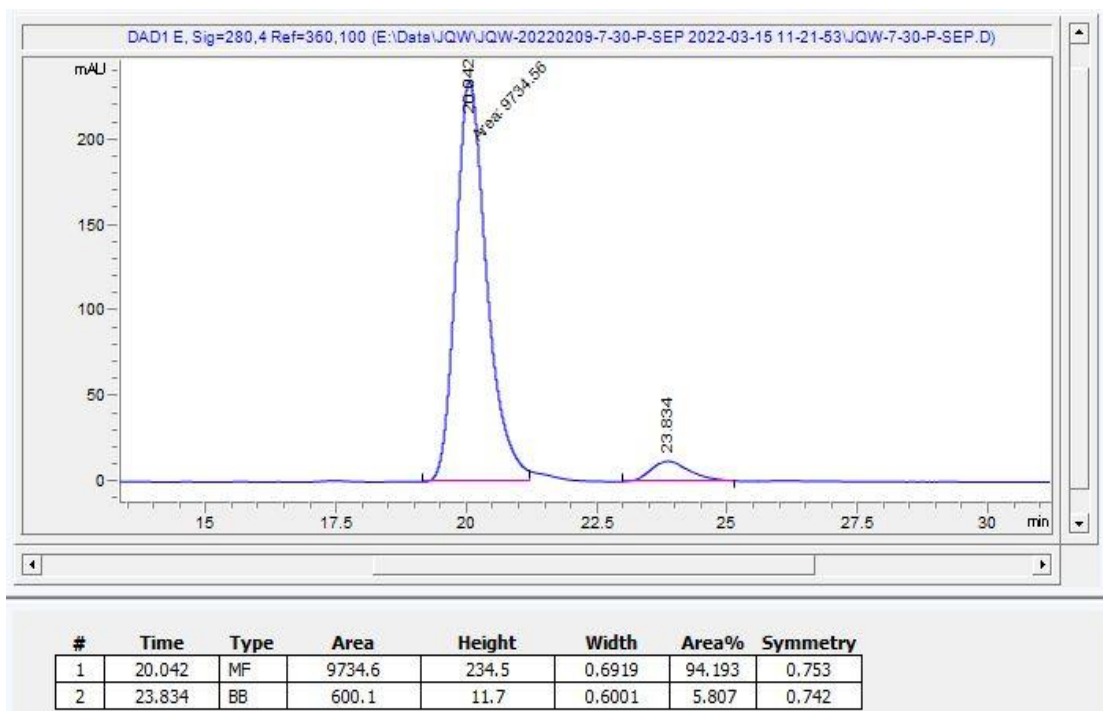

(S)-N-(1-([1,1'-biphenyl]-4-yl)-1-(*o*-tolyl)ethyl)aniline ((S)-**1j**)

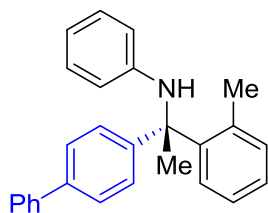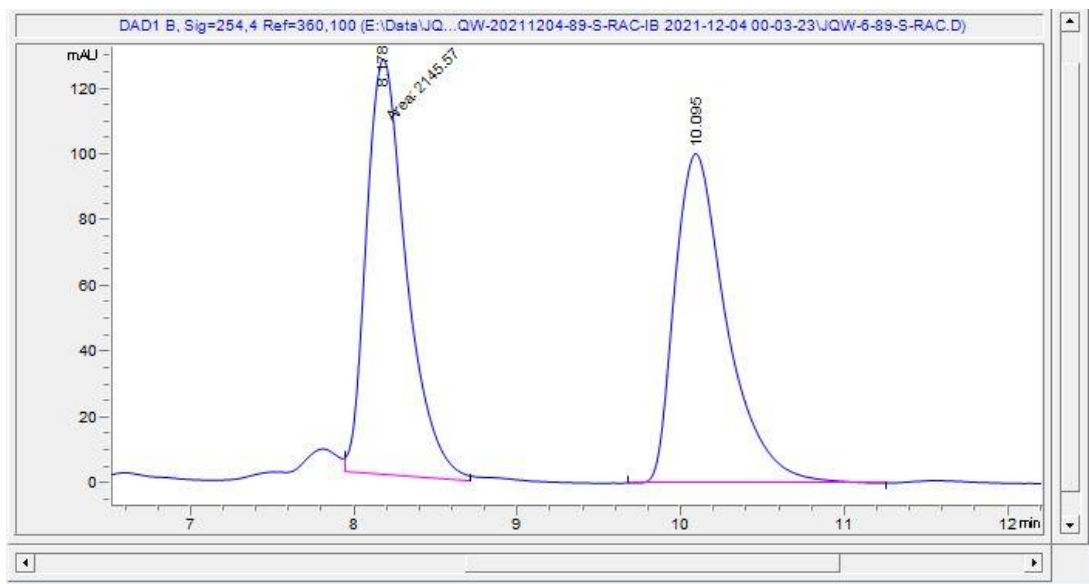

| # | Time   | Type | Area   | Height | Width  | Area%  | Symmetry |
|---|--------|------|--------|--------|--------|--------|----------|
| 1 | 8.178  | MM   | 2145.6 | 125.9  | 0.2839 | 49.196 | 0.704    |
| 2 | 10.095 | BB   | 2215.7 | 99.9   | 0.3407 | 50.804 | 0.623    |

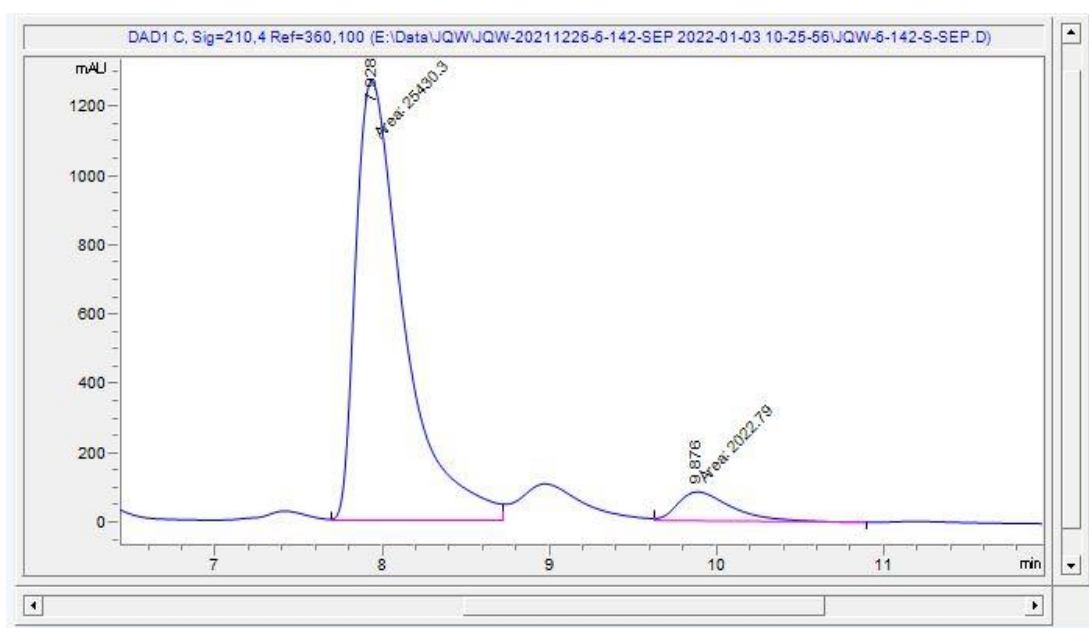

| # | Time  | Type | Area    | Height | Width  | Area%  | Symmetry |
|---|-------|------|---------|--------|--------|--------|----------|
| 1 | 7.928 | MF   | 25430.3 | 1266.4 | 0.3347 | 92.632 | 0.471    |
| 2 | 9.876 | FM   | 2022.8  | 86.3   | 0.3906 | 7.368  | 0.555    |



Dibenzyl-(*R*)-1-(4-((1-([1,1'-biphenyl]-4-yl)-1-(*o*-tolyl)ethyl)amino)phenyl)hydrazine-1,2-dicarboxylate (**3j**)

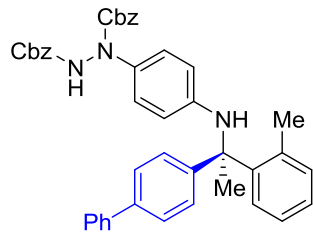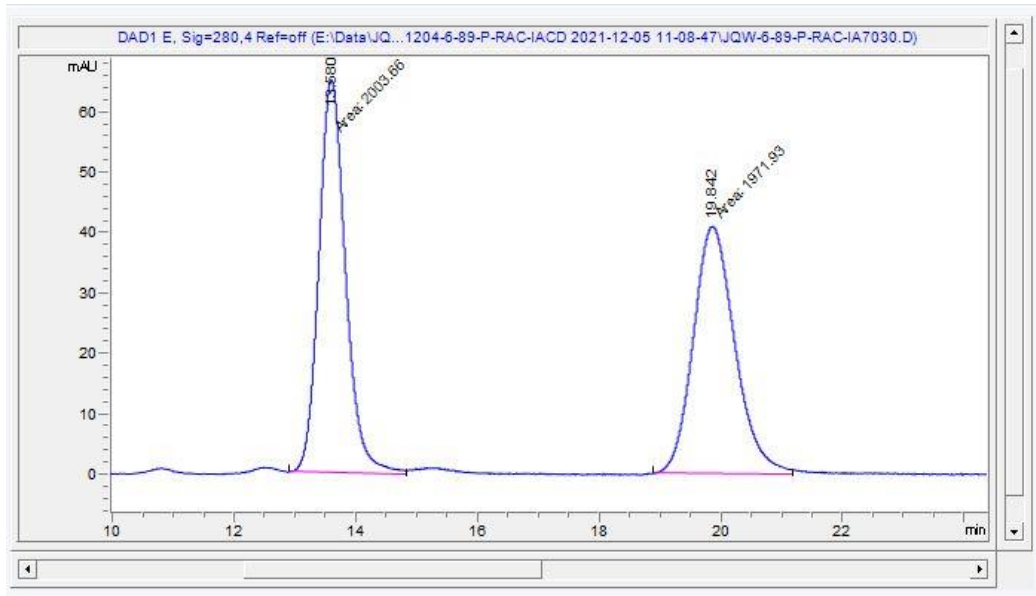

| # | Time   | Type | Area   | Height | Width  | Area%  | Symmetry |
|---|--------|------|--------|--------|--------|--------|----------|
| 1 | 13.58  | MM   | 2003.7 | 65.3   | 0.5117 | 50.399 | 0.846    |
| 2 | 19.842 | MM   | 1971.9 | 41.2   | 0.7983 | 49.601 | 0.859    |

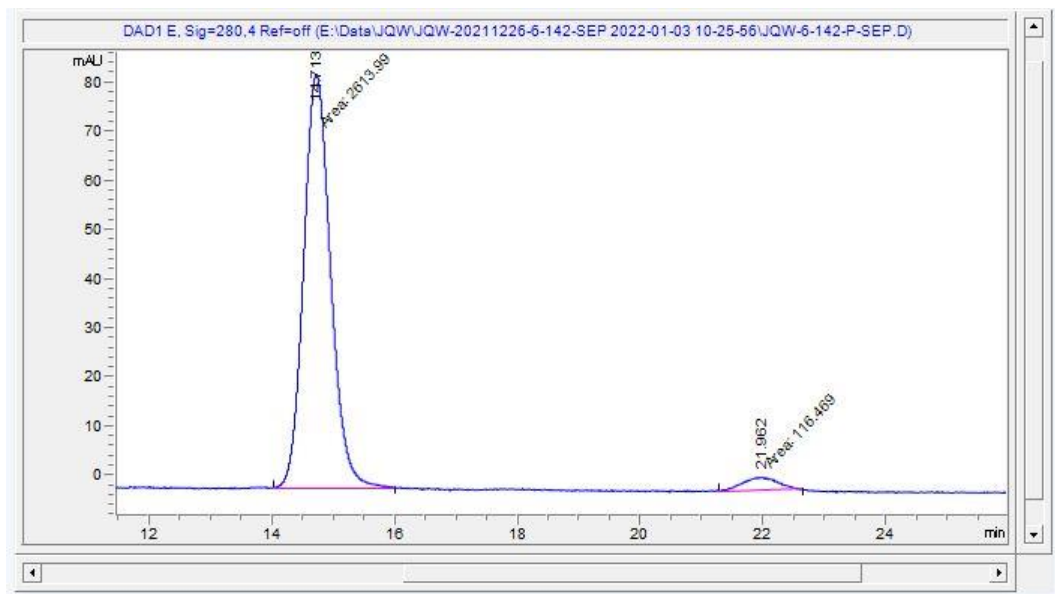

| # | Time   | Type | Area  | Height | Width  | Area%  | Symmetry |
|---|--------|------|-------|--------|--------|--------|----------|
| 1 | 14.713 | MM   | 2614  | 84.8   | 0.514  | 95.734 | 0.882    |
| 2 | 21.962 | MM   | 116.5 | 2.8    | 0.6842 | 4.266  | 1.208    |

(S)-N-(1-(3-methoxyphenyl)-1-(o-tolyl)ethyl)aniline ((S)-**1k**)

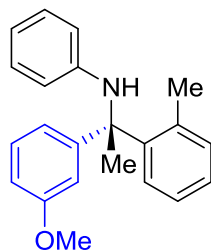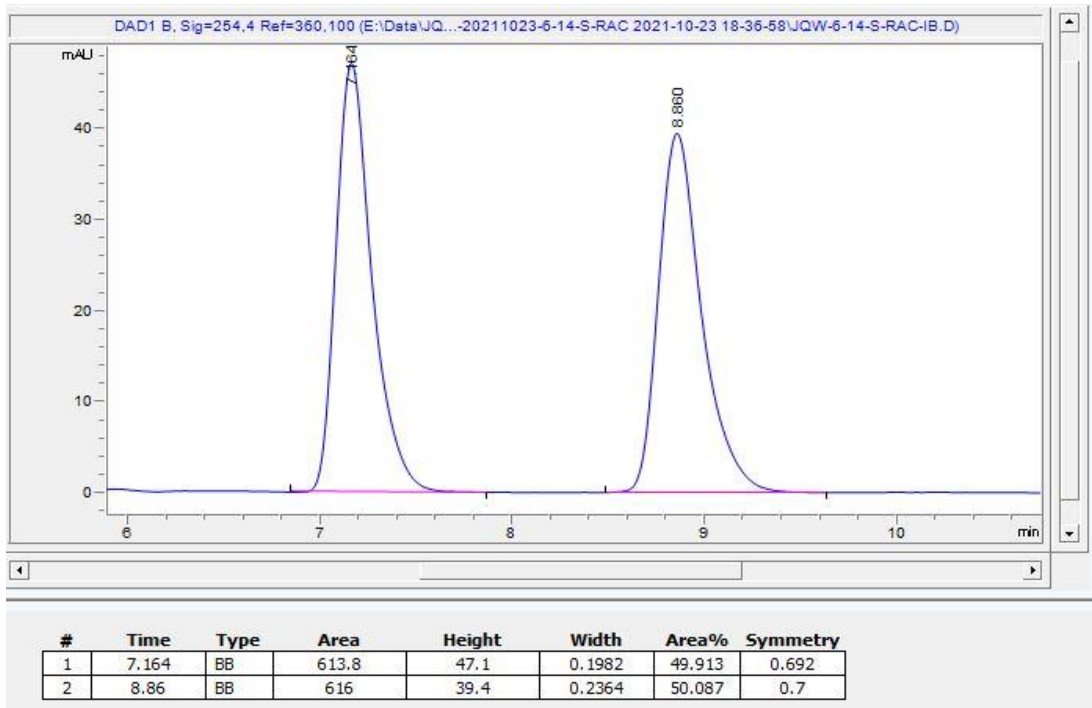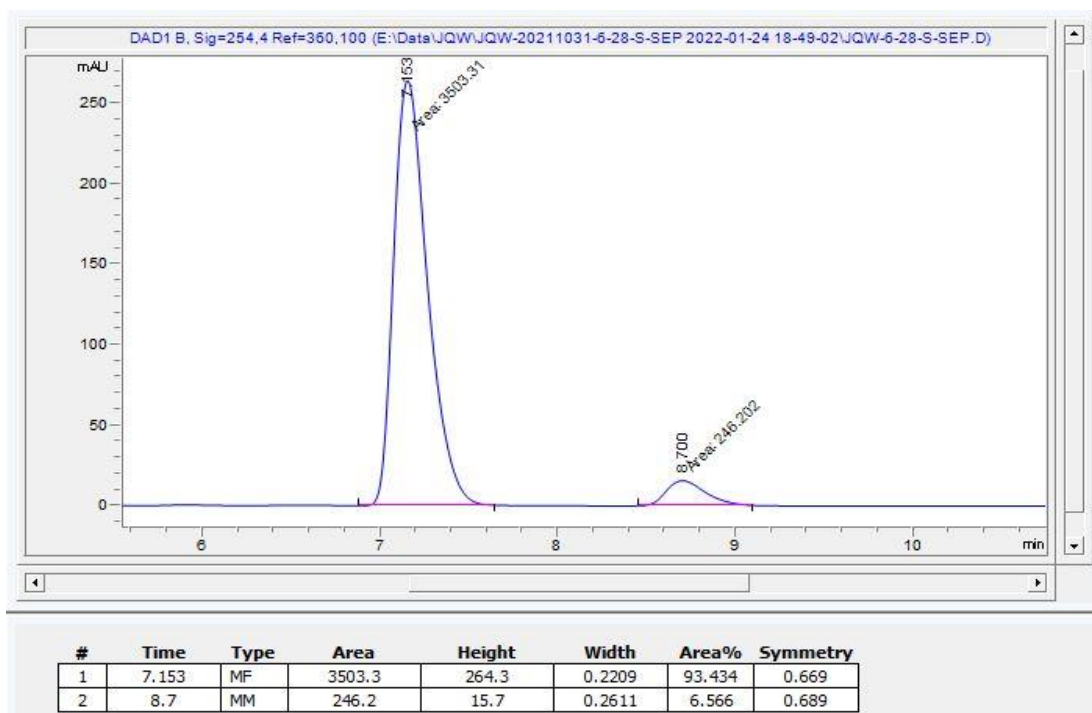

Dibenzyl-(*R*)-1-(4-((1-(3-methoxyphenyl)-1-(*o*-tolyl)ethyl)amino)phenyl)hydrazine-1,2-dicarboxylate (**3k**)

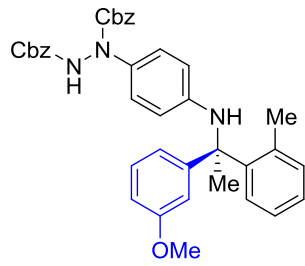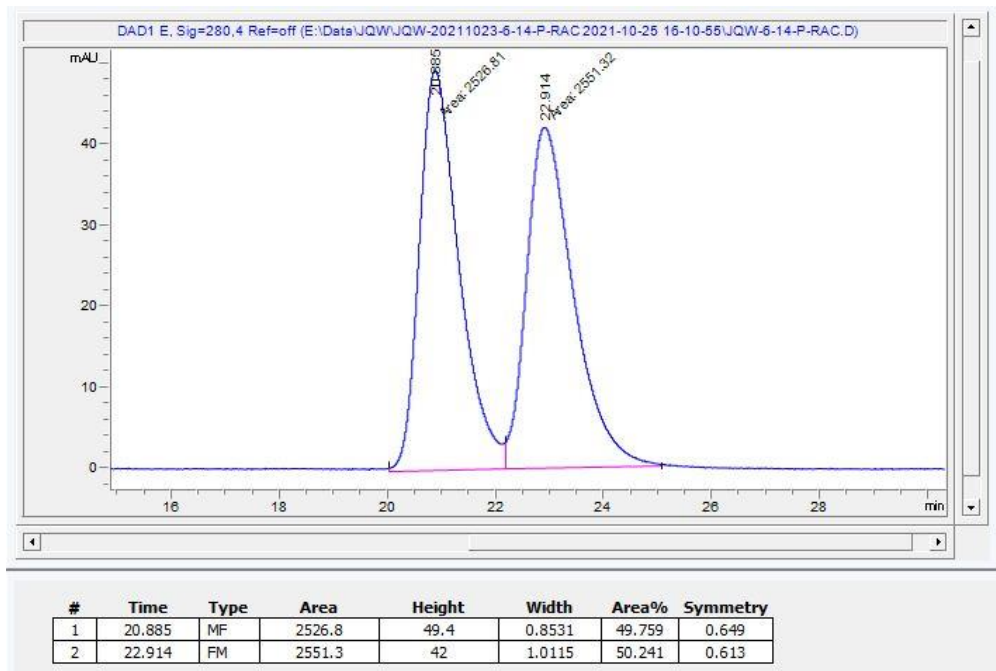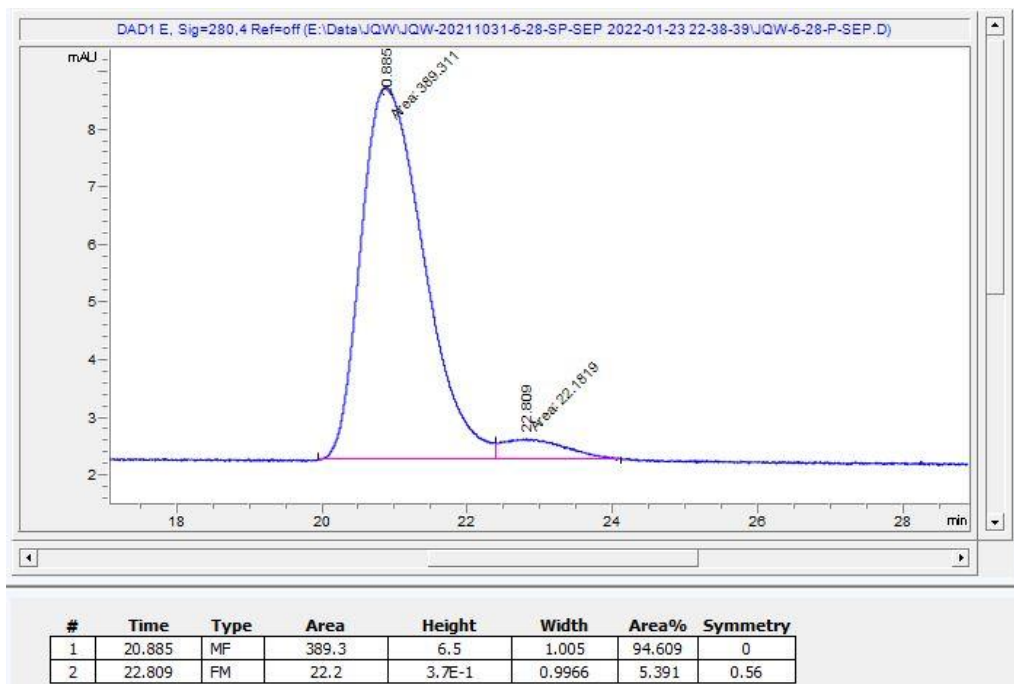

(S)-N-(1-(naphthalen-2-yl)-1-(o-tolyl)ethyl)aniline ((S)-**11**)

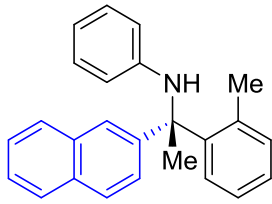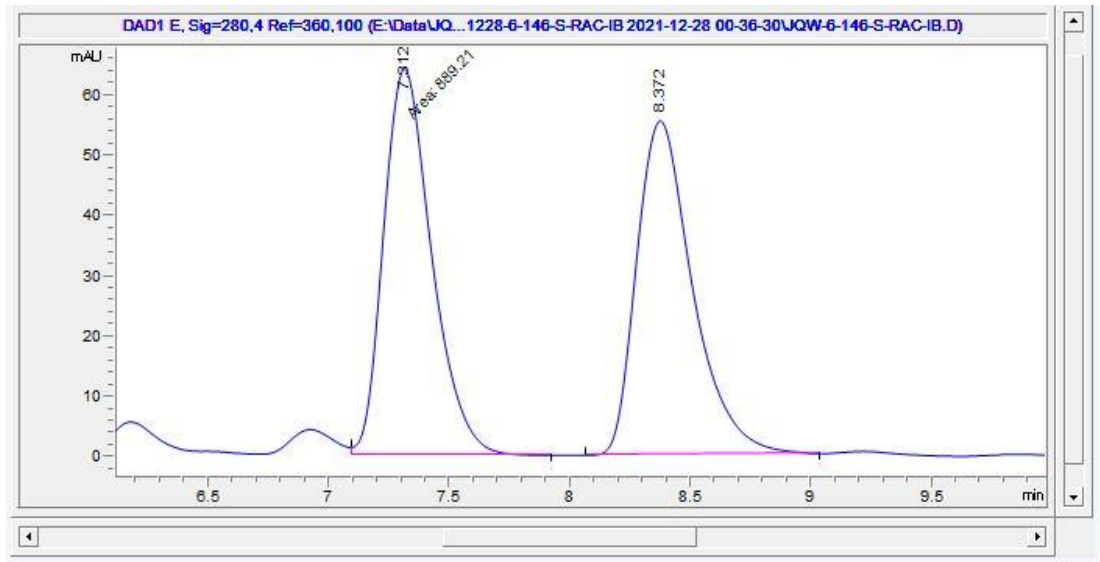

| # | Time  | Type | Area  | Height | Width  | Area%  | Symmetry |
|---|-------|------|-------|--------|--------|--------|----------|
| 1 | 7.312 | FM   | 889.2 | 64.2   | 0.2307 | 49.790 | 0.742    |
| 2 | 8.372 | BB   | 896.7 | 55.6   | 0.2481 | 50.210 | 0.681    |

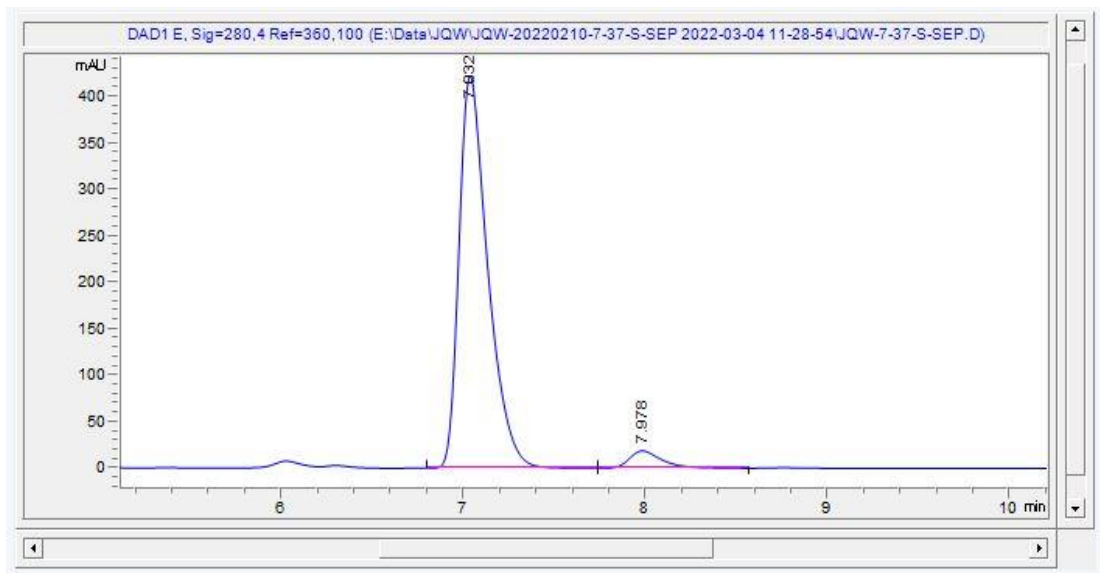

| # | Time  | Type | Area   | Height | Width  | Area%  | Symmetry |
|---|-------|------|--------|--------|--------|--------|----------|
| 1 | 7.032 | BB   | 4614.5 | 421.4  | 0.1637 | 95.250 | 0.582    |
| 2 | 7.978 | BB   | 230.1  | 18.6   | 0.1843 | 4.750  | 0.612    |

Dibenzyl-(*R*)-1-(4-((1-(naphthalen-2-yl)-1-(*o*-tolyl)ethyl)amino)phenyl)hydrazine-1,2-dicarboxylate (**3I**)

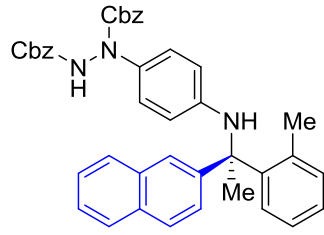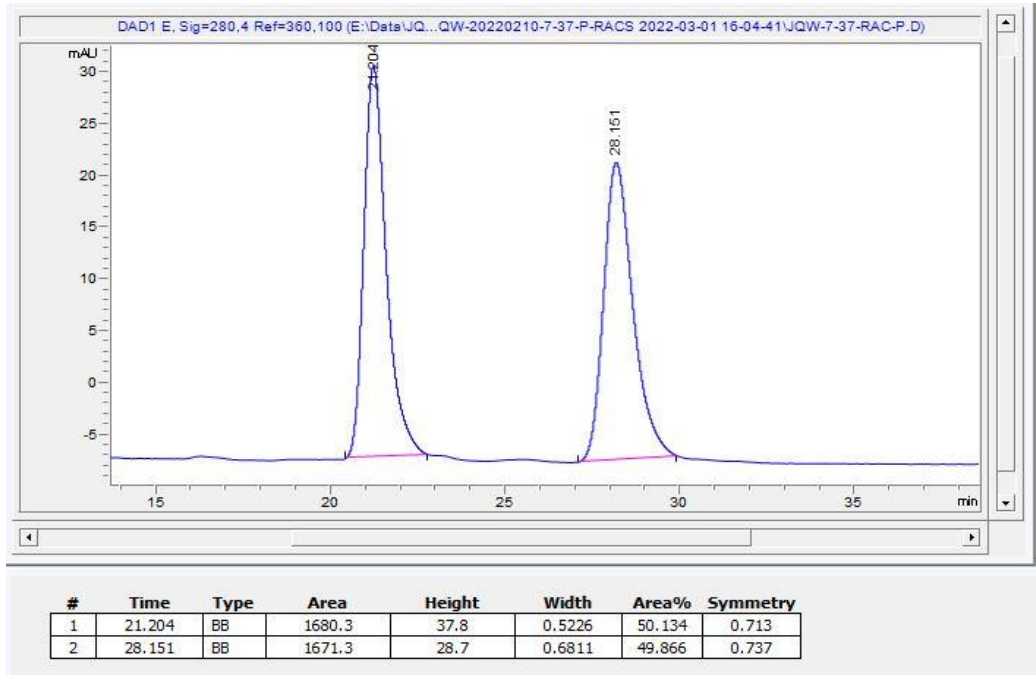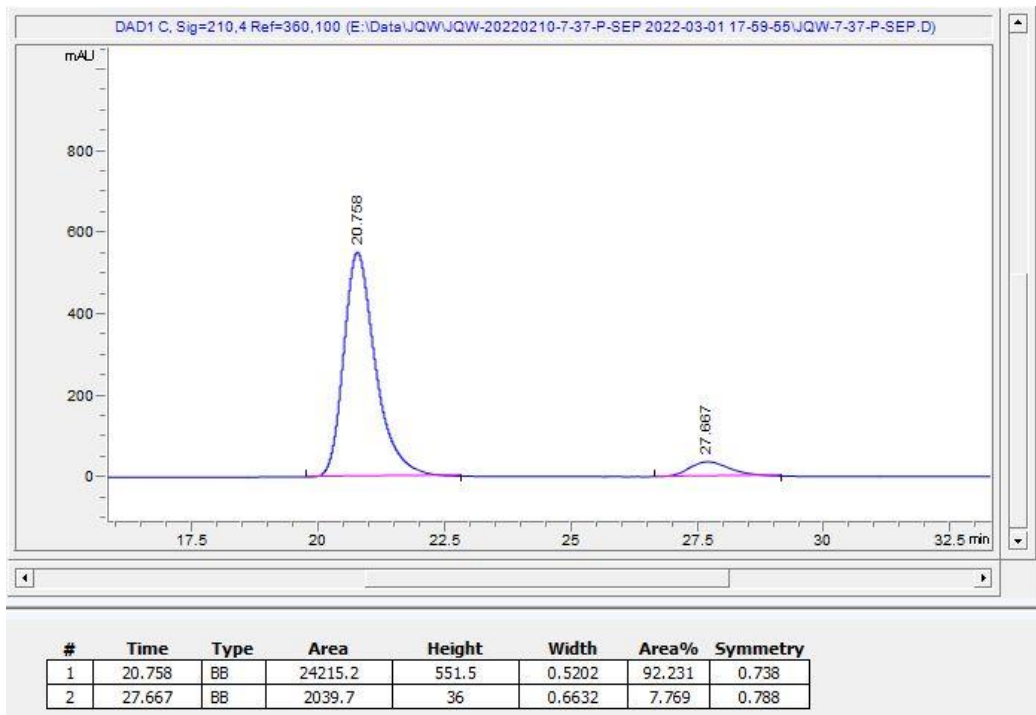

(S)-N-(1-(benzo[d][1,3]dioxol-5-yl)-1-(o-tolyl)ethyl)aniline ((S)-**1m**)

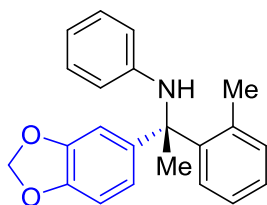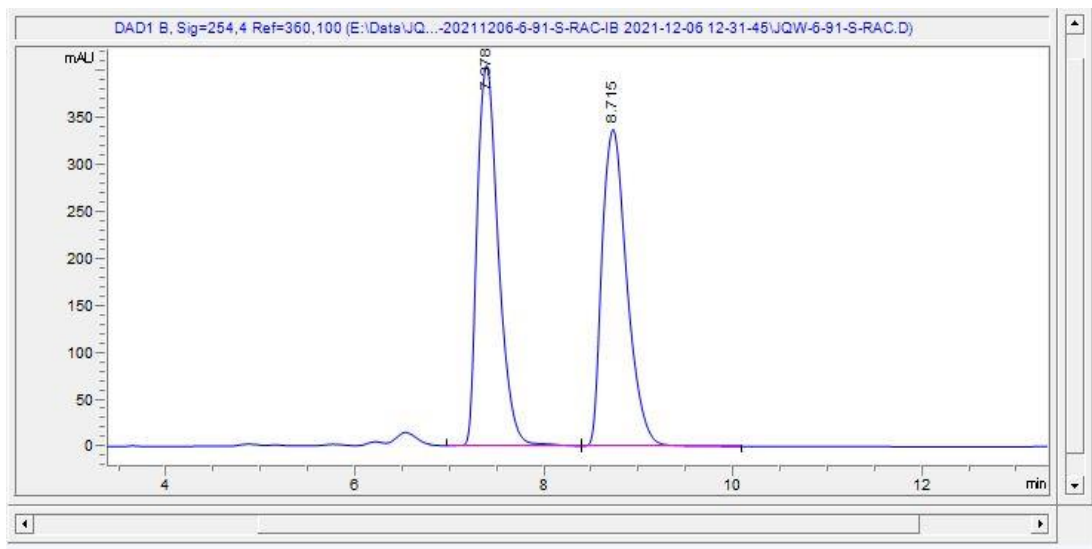

| # | Time  | Type | Area   | Height | Width  | Area%  | Symmetry |
|---|-------|------|--------|--------|--------|--------|----------|
| 1 | 7.378 | BB   | 6285.6 | 403.5  | 0.2417 | 50.602 | 0.725    |
| 2 | 8.715 | BB   | 6135.9 | 335.9  | 0.2851 | 49.398 | 0.73     |

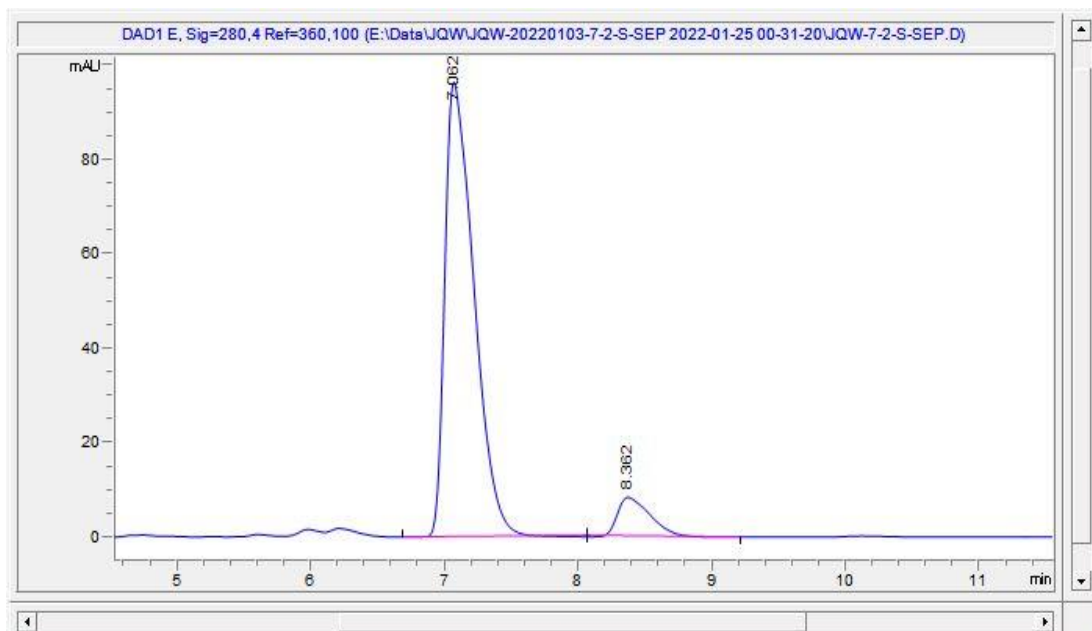

| # | Time  | Type | Area   | Height | Width  | Area%  | Symmetry |
|---|-------|------|--------|--------|--------|--------|----------|
| 1 | 7.062 | BB   | 1463.7 | 96.7   | 0.2405 | 90.994 | 0.426    |
| 2 | 8.362 | BB   | 144.9  | 8.4    | 0.2406 | 9.006  | 0.453    |

Dibenzyl-(*R*)-1-(4-((1-(benzo[d][1,3]dioxol-5-yl)-1-(*o*-tolyl)ethyl)amino)phenyl)hydrazine-1,2-di-carboxylate (**3m**)

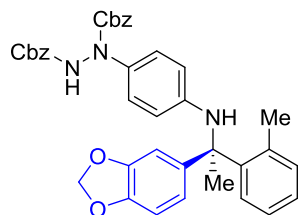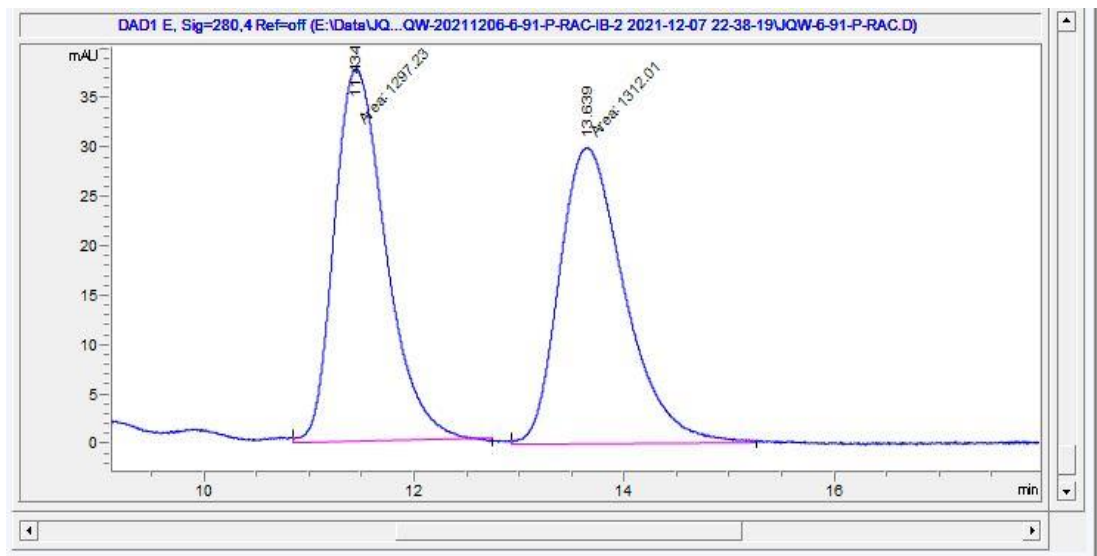

| # | Time   | Type | Area   | Height | Width  | Area%  | Symmetry |
|---|--------|------|--------|--------|--------|--------|----------|
| 1 | 11.434 | MM   | 1297.2 | 38     | 0.5692 | 49.717 | 0.696    |
| 2 | 13.639 | MM   | 1312   | 30.2   | 0.723  | 50.283 | 0.723    |

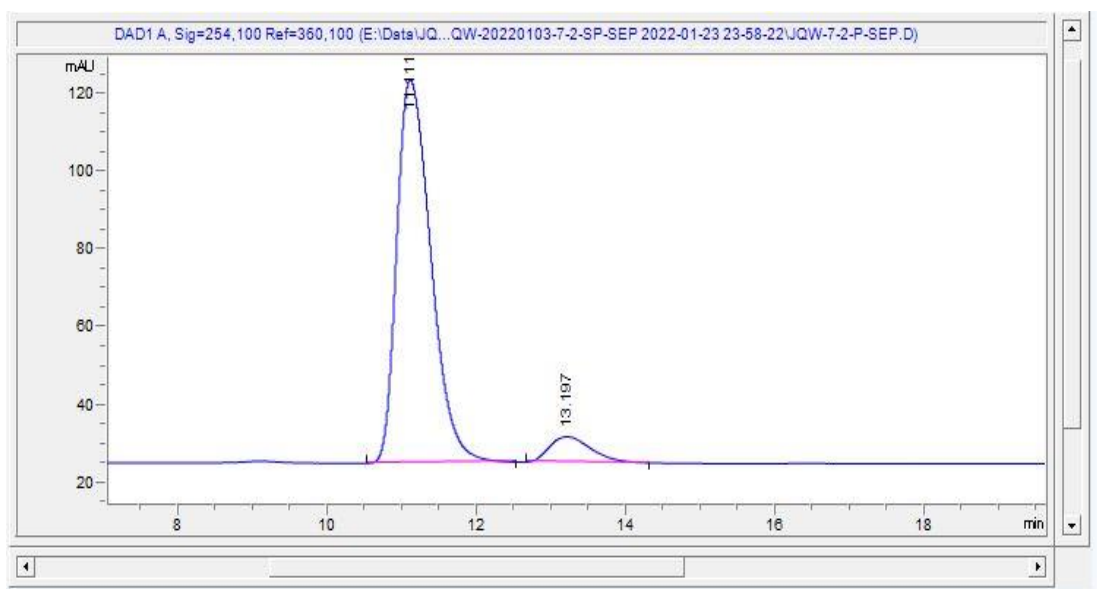

| # | Time   | Type | Area   | Height | Width  | Area%  | Symmetry |
|---|--------|------|--------|--------|--------|--------|----------|
| 1 | 11.111 | BB   | 3135.1 | 98.6   | 0.3884 | 92.464 | 0.65     |
| 2 | 13.197 | BB   | 255.5  | 6.6    | 0.454  | 7.536  | 0.655    |

(S)-N-(1-(3-chloro-2-methylphenyl)-1-phenylethyl)aniline ((S)-**1n**)

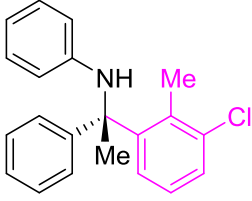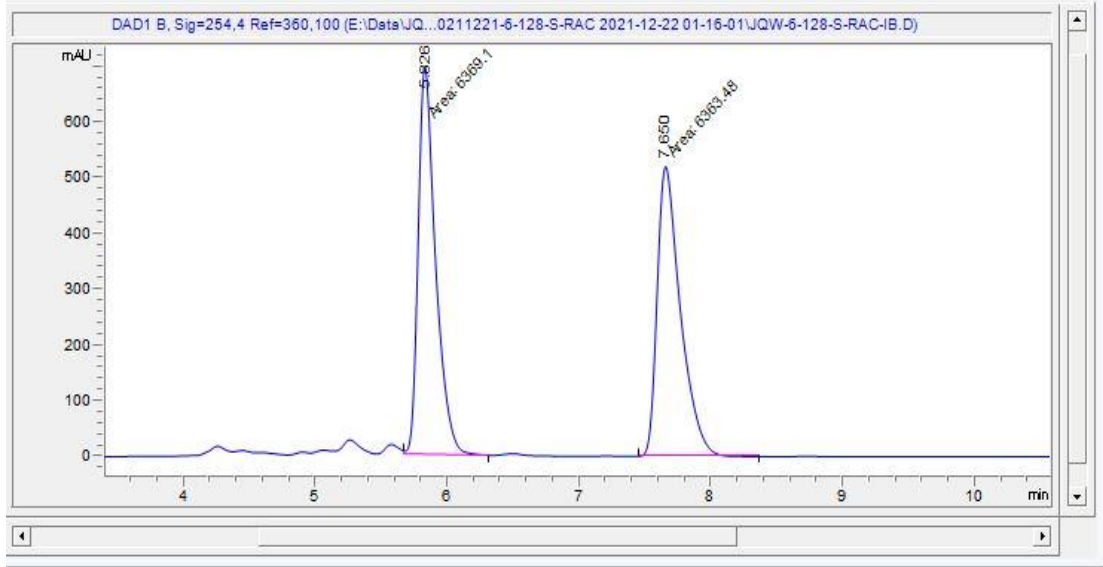

| # | Time  | Type | Area   | Height | Width  | Area%  | Symmetry |
|---|-------|------|--------|--------|--------|--------|----------|
| 1 | 5.826 | FM   | 6369.1 | 697.2  | 0.1523 | 50.022 | 0.608    |
| 2 | 7.650 | FM   | 6363.5 | 520.4  | 0.2038 | 49.978 | 0.551    |

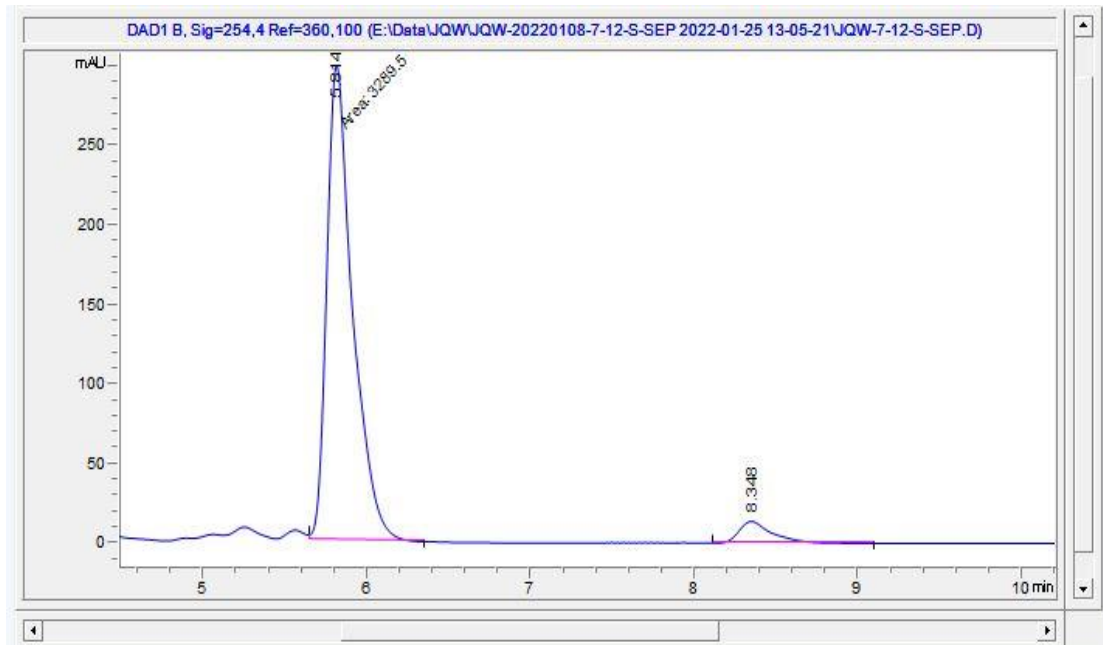

| # | Time  | Type | Area   | Height | Width  | Area%  | Symmetry |
|---|-------|------|--------|--------|--------|--------|----------|
| 1 | 5.814 | FM   | 3289.5 | 300.1  | 0.1827 | 94.446 | 0.586    |
| 2 | 8.348 | BB   | 193.4  | 13.7   | 0.2043 | 5.554  | 0.541    |



Dibenzyl-(*R*)-1-(4-((1-(3-chloro-2-methylphenyl)-1-phenylethyl)amino)phenyl)hydrazine-1,2-di-carboxylate (**3n**)

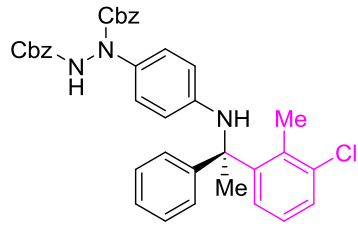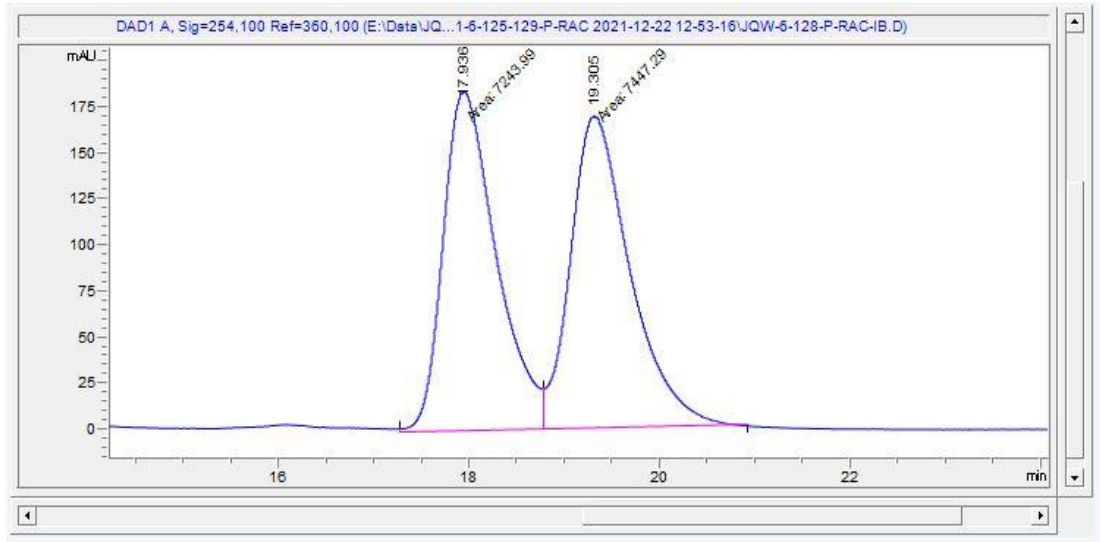

| # | Time   | Type | Area   | Height | Width  | Area%  | Symmetry |
|---|--------|------|--------|--------|--------|--------|----------|
| 1 | 17.936 | MF   | 7244   | 186.1  | 0.6488 | 49.308 | 0.631    |
| 2 | 19.305 | FM   | 7447.3 | 171.2  | 0.7249 | 50.692 | 0.654    |

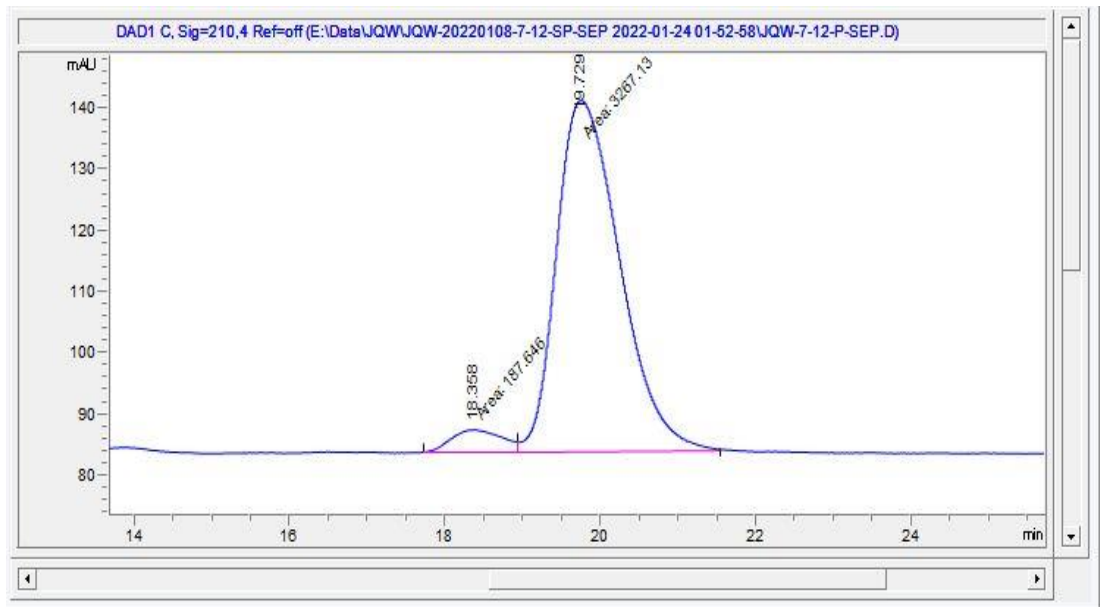

| # | Time   | Type | Area   | Height | Width  | Area%  | Symmetry |
|---|--------|------|--------|--------|--------|--------|----------|
| 1 | 18.358 | MF   | 187.6  | 3.9    | 0.795  | 5.431  | 0        |
| 2 | 19.729 | FM   | 3267.1 | 57.7   | 0.9437 | 94.569 | 0.614    |

(S)-N-(1-(2,4-dimethylphenyl)-1-phenylethyl)aniline ((S)-**1o**)

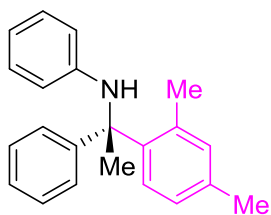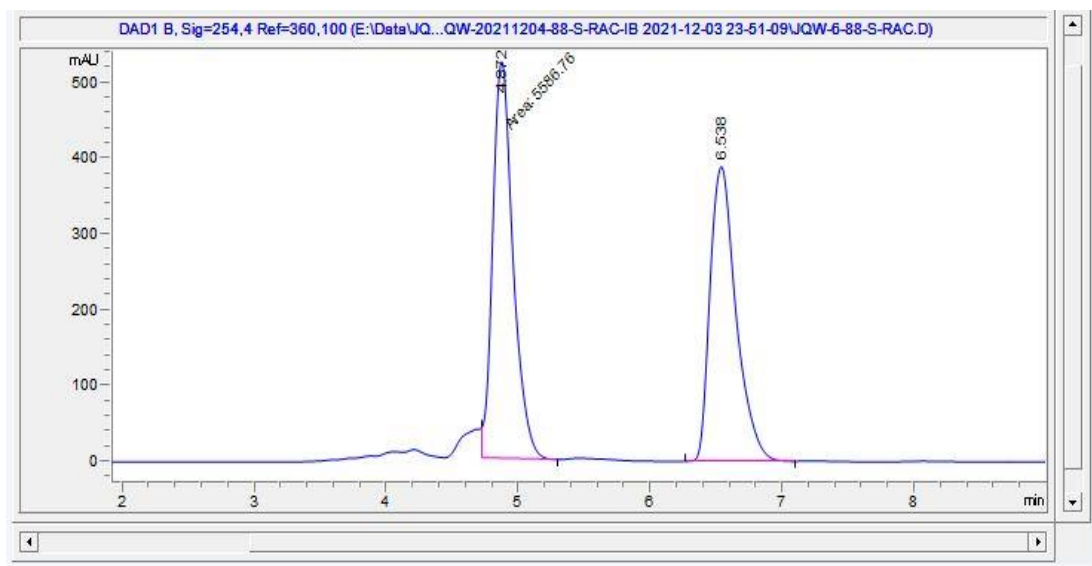

| # | Time  | Type | Area   | Height | Width  | Area%  | Symmetry |
|---|-------|------|--------|--------|--------|--------|----------|
| 1 | 4.872 | FM   | 5586.8 | 522.3  | 0.1783 | 51.273 | 0.764    |
| 2 | 6.538 | BB   | 5309.3 | 387.6  | 0.2098 | 48.727 | 0.698    |

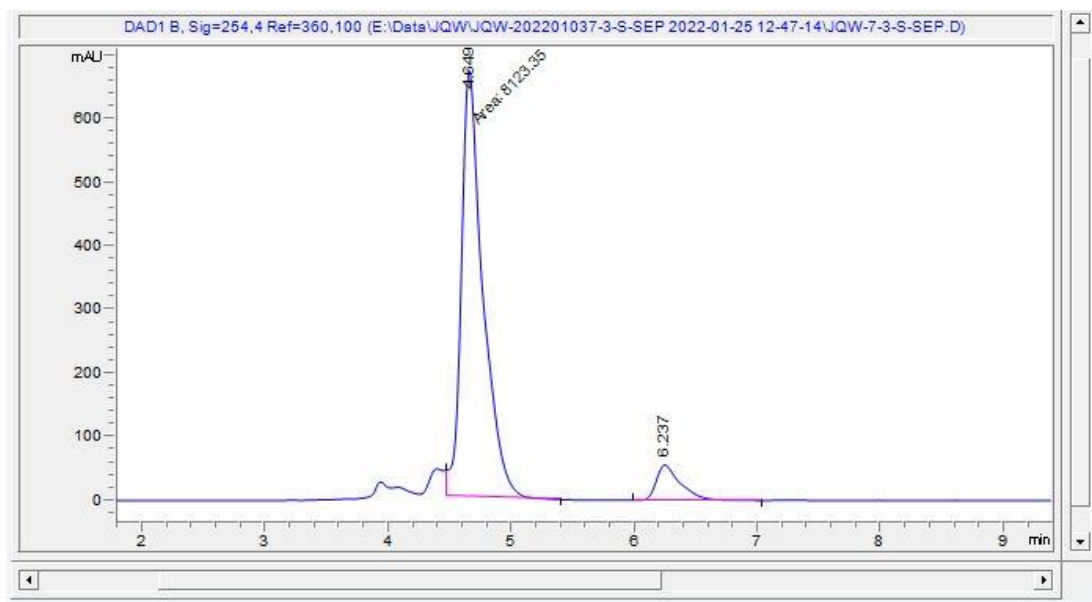

| # | Time  | Type | Area   | Height | Width  | Area%  | Symmetry |
|---|-------|------|--------|--------|--------|--------|----------|
| 1 | 4.649 | FM   | 8123.3 | 670.5  | 0.2019 | 91.550 | 0.562    |
| 2 | 6.237 | BB   | 749.8  | 55.3   | 0.1961 | 8.450  | 0.509    |

Dibenzyl-(*R*)-1-(4-((1-(2,4-dimethylphenyl)-1-phenylethyl)amino)phenyl)hydrazine-1,2-dicarboxylate (**30**)

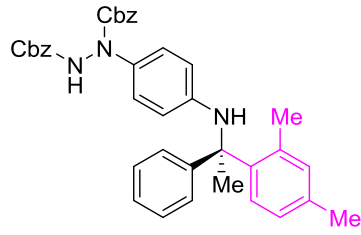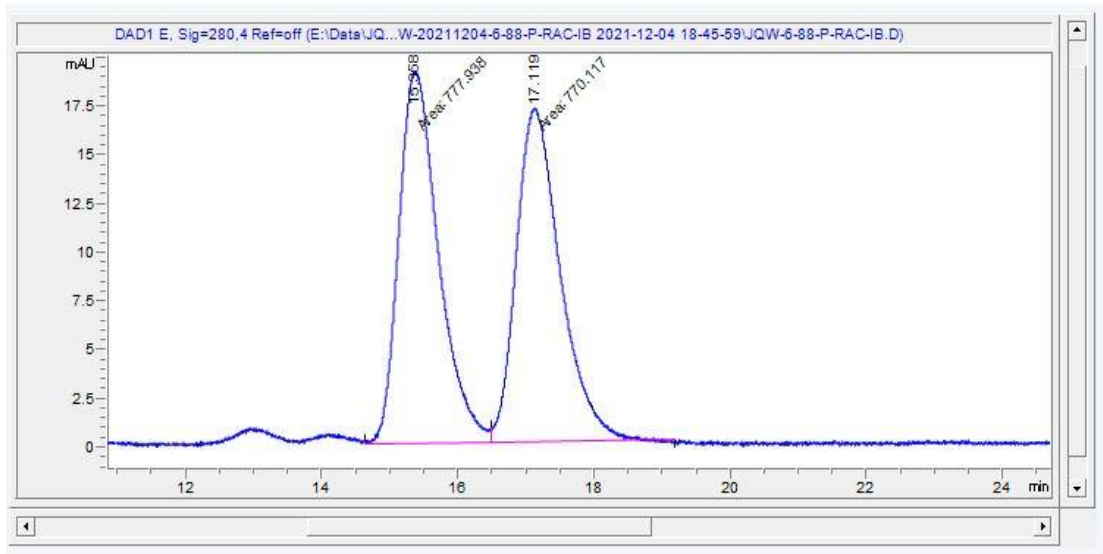

| # | Time   | Type | Area  | Height | Width  | Area%  | Symmetry |
|---|--------|------|-------|--------|--------|--------|----------|
| 1 | 15.358 | MF   | 777.9 | 19.1   | 0.6779 | 50.253 | 0        |
| 2 | 17.119 | FM   | 770.1 | 17.1   | 0.7492 | 49.747 | 0.719    |

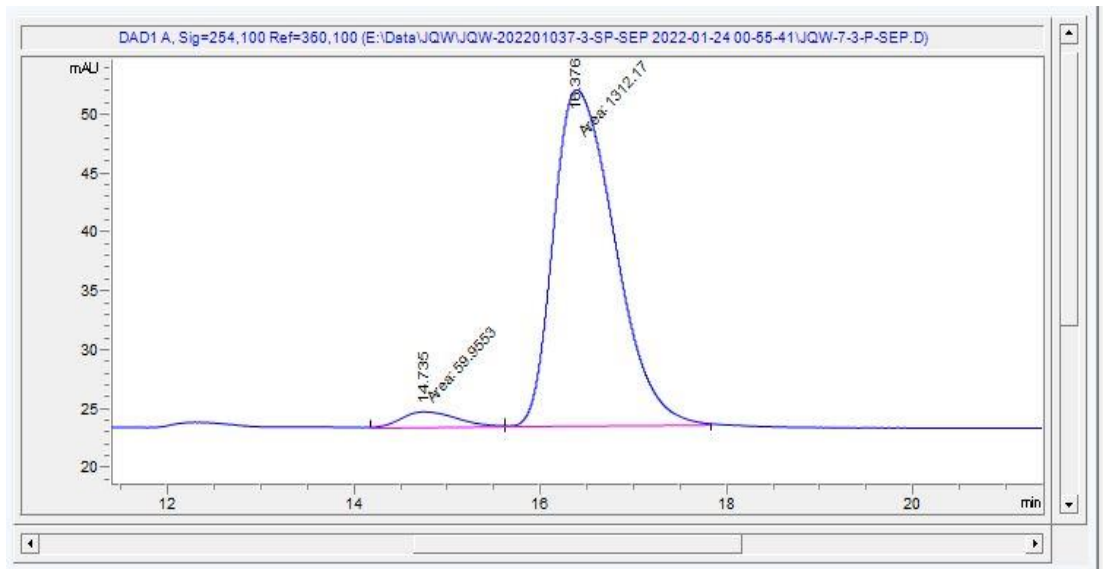

| # | Time   | Type | Area   | Height | Width  | Area%  | Symmetry |
|---|--------|------|--------|--------|--------|--------|----------|
| 1 | 14.735 | MF   | 60     | 1.4    | 0.722  | 4.370  | 0        |
| 2 | 16.376 | FM   | 1312.2 | 28.6   | 0.7651 | 95.630 | 0.606    |

(S)-N-(1-(4-chloro-2-methylphenyl)-1-phenylethyl)aniline ((S)-**1p**)

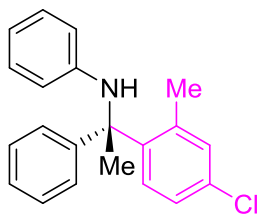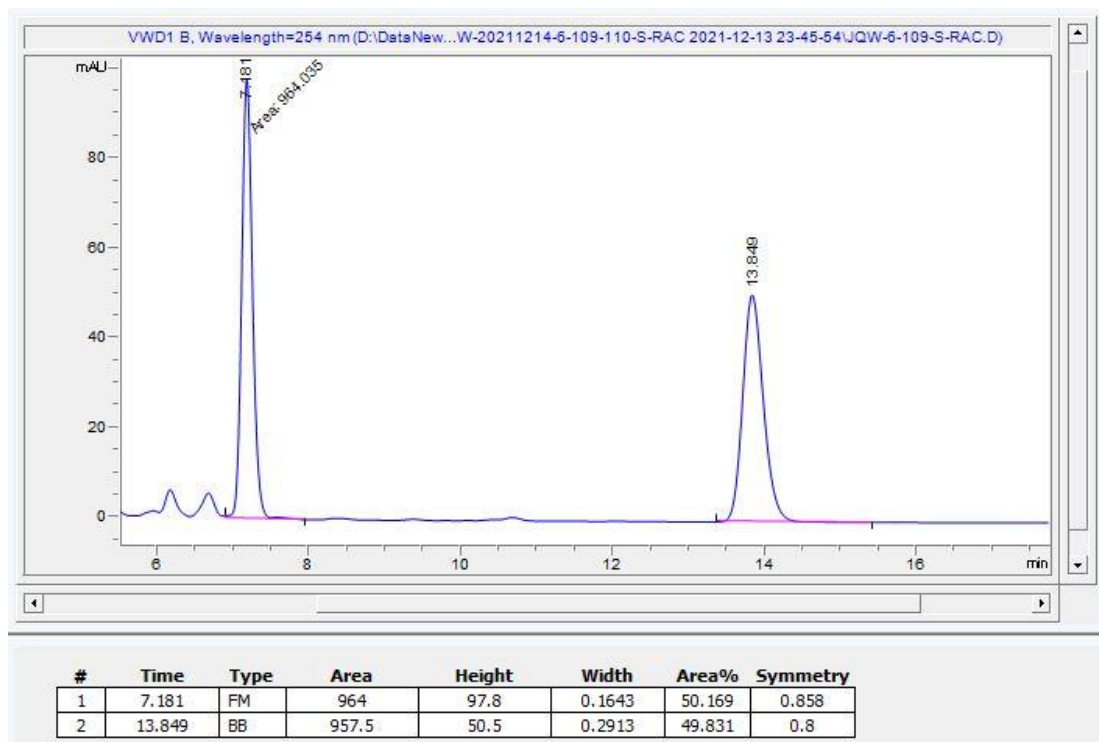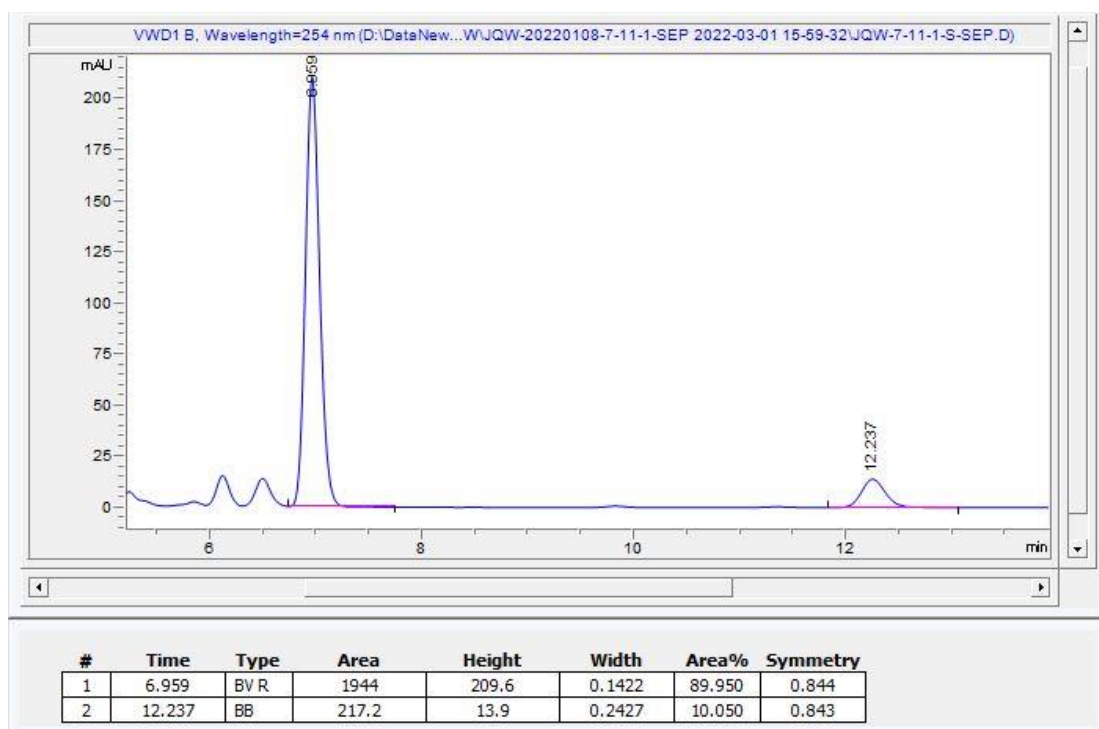

Dibenzyl-(*R*)-1-(4-((1-(4-chloro-2-methylphenyl)-1-phenylethyl)amino)phenyl)hydrazine-1,2-di-carboxylate (**3p**)

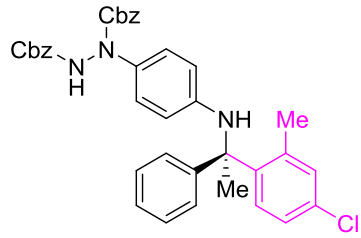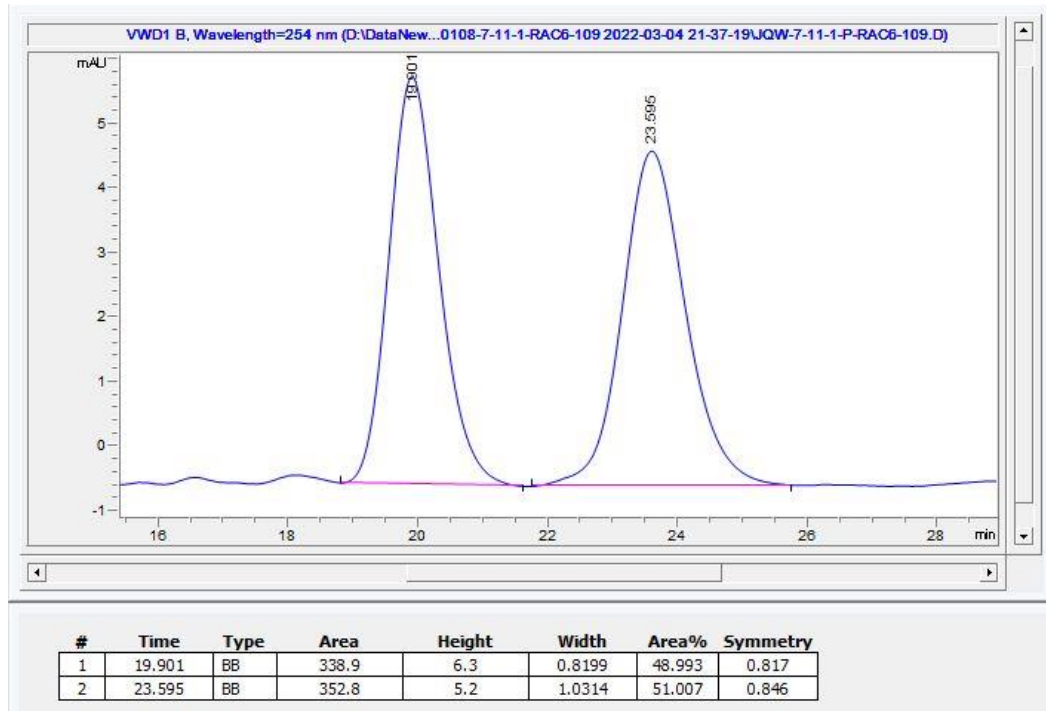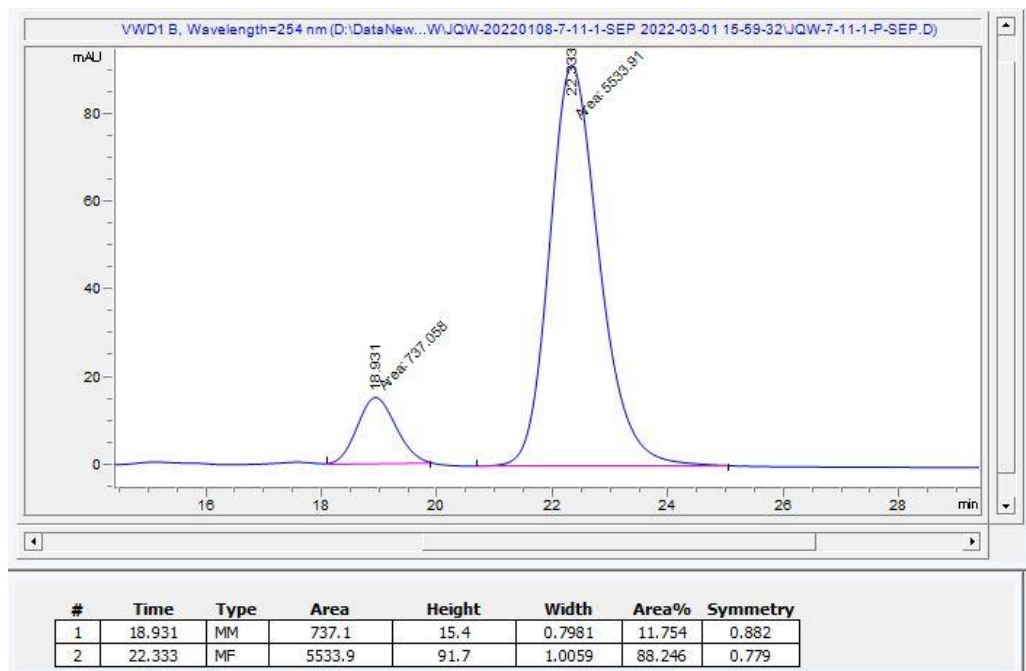

(S)-N-(1-(4-methoxy-2-methylphenyl)-1-phenylethyl)aniline ((S)-1q)

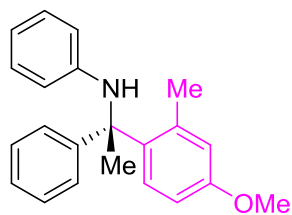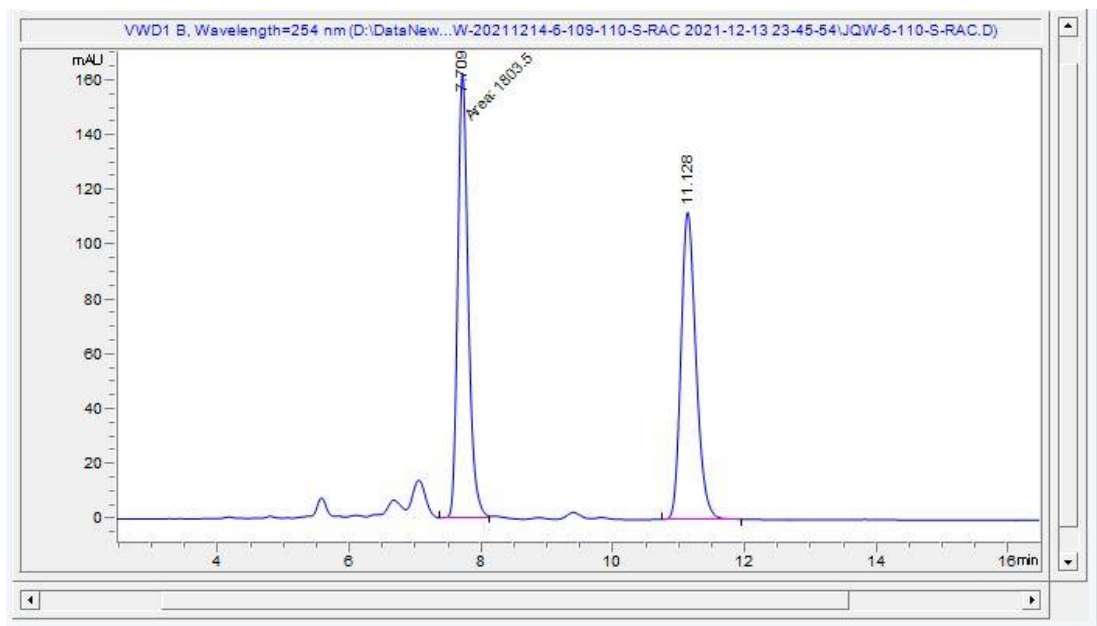

| # | Time   | Type | Area   | Height | Width  | Area%  | Symmetry |
|---|--------|------|--------|--------|--------|--------|----------|
| 1 | 7.709  | MF   | 1803.5 | 162.2  | 0.1853 | 50.488 | 0.788    |
| 2 | 11.128 | BB   | 1768.6 | 112.1  | 0.2421 | 49.512 | 0.763    |

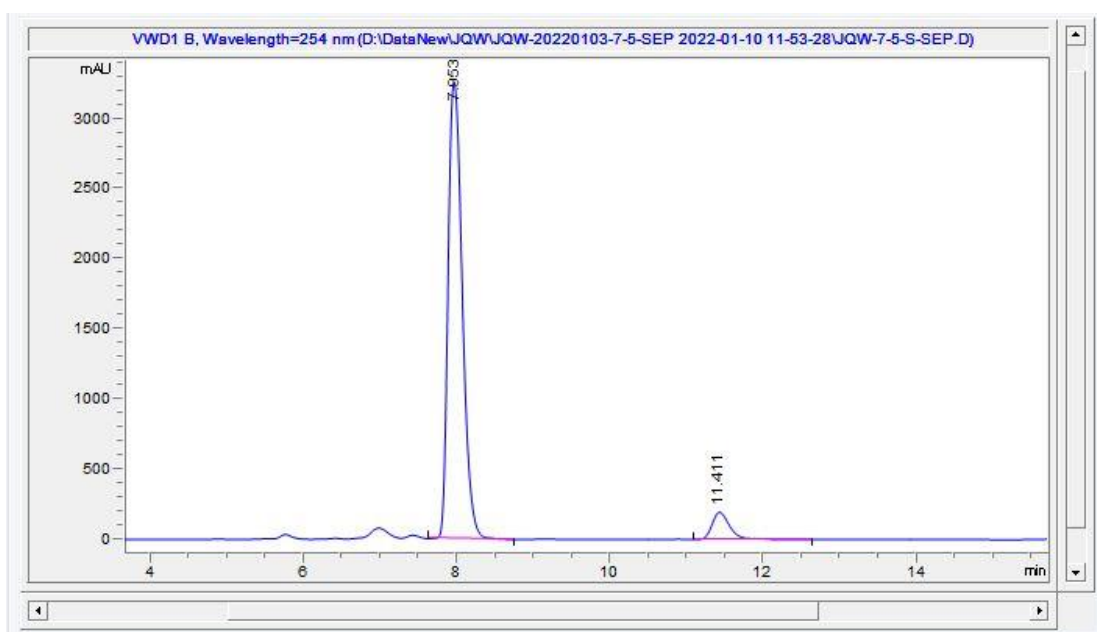

| # | Time   | Type | Area    | Height | Width  | Area%  | Symmetry |
|---|--------|------|---------|--------|--------|--------|----------|
| 1 | 7.953  | BB   | 41539.3 | 3246.8 | 0.2013 | 92.979 | 0.673    |
| 2 | 11.411 | BV R | 3136.7  | 193.9  | 0.2421 | 7.021  | 0.69     |

Dibenzyl(R)-1-(4-((1-(4-methoxy-2-methylphenyl)-1-phenylethyl)amino)phenyl)hydrazine-1,  
2-di-carboxylate (**3q**)

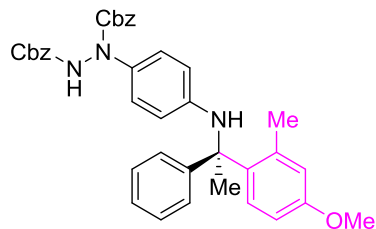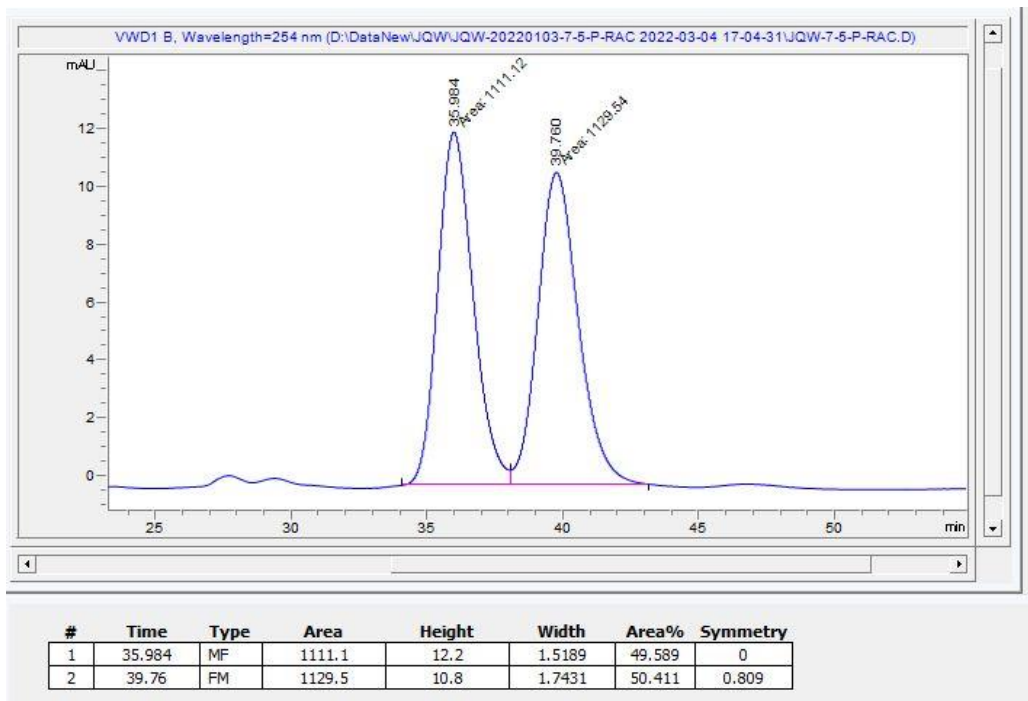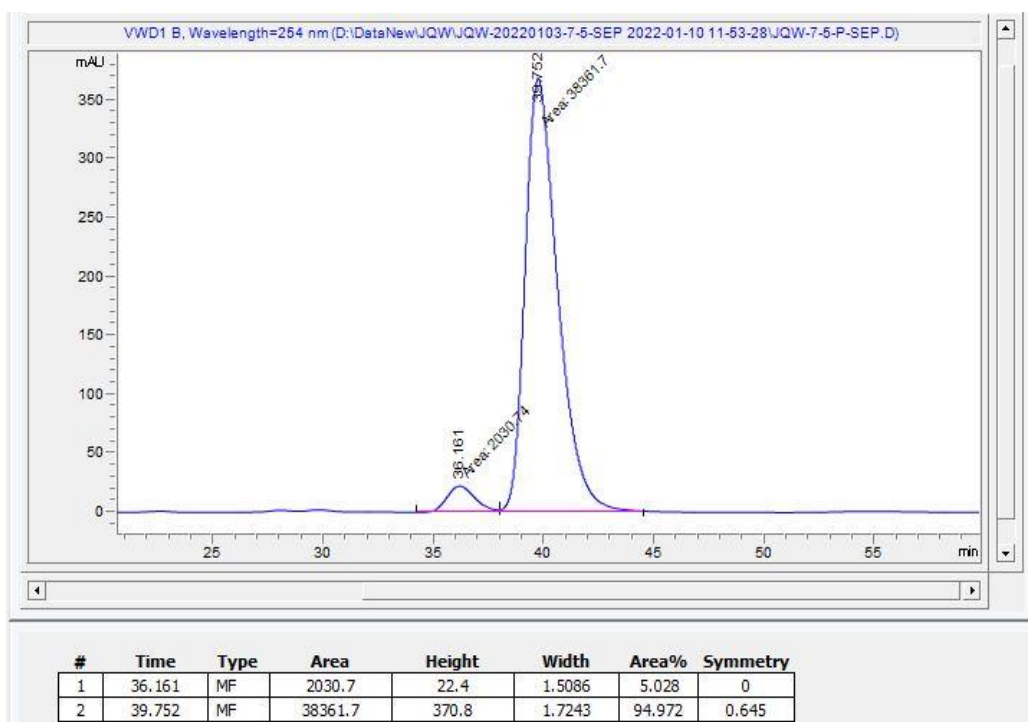

(S)-N-(1-(2,5-dimethylphenyl)-1-phenylethyl)aniline ((S)-**1r**)

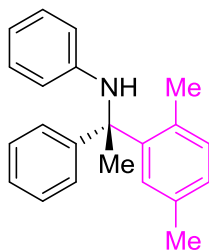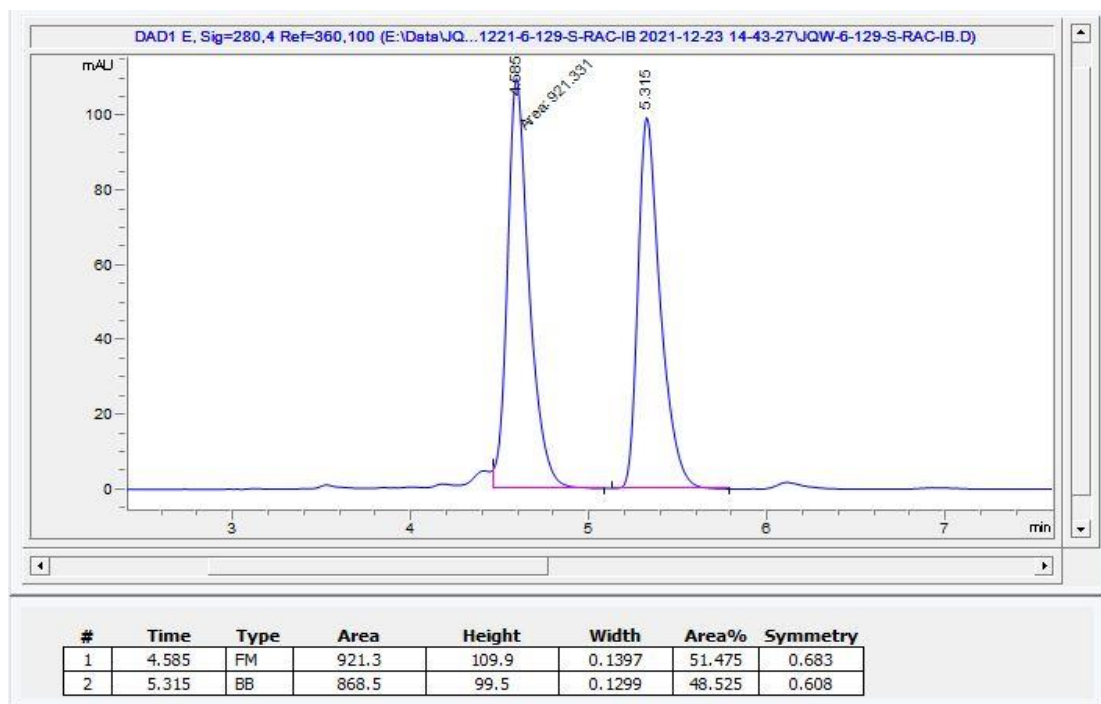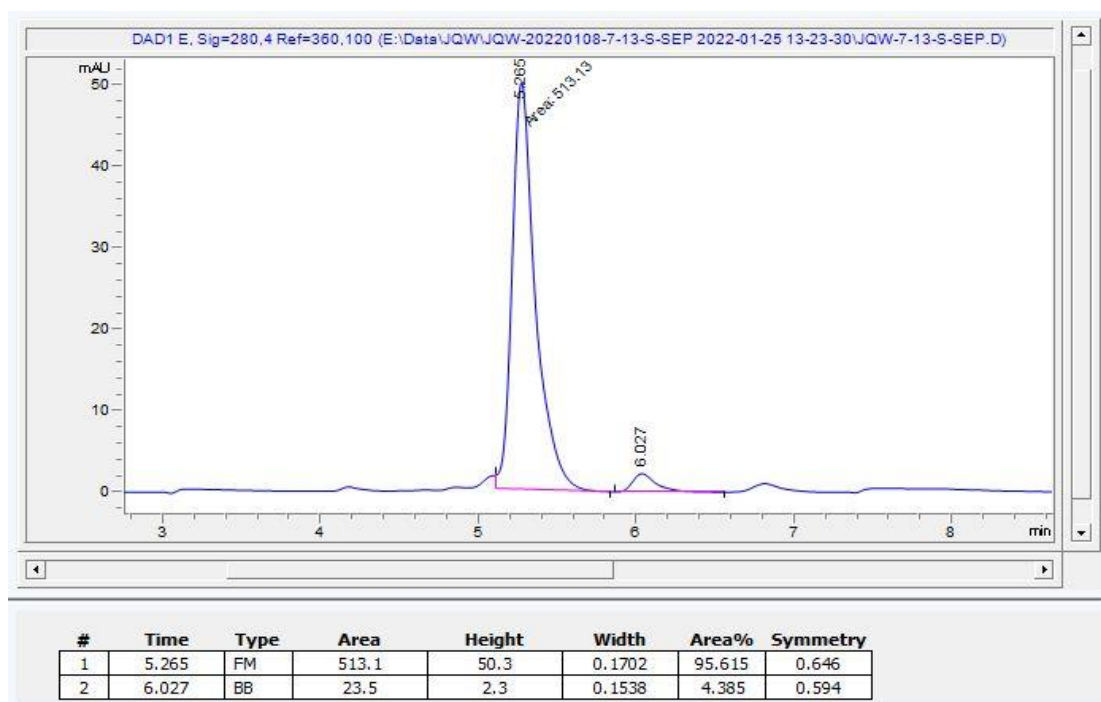



Dibenzyl-(*R*)-1-(4-((1-(2,5-dimethylphenyl)-1-phenylethyl)amino)phenyl)hydrazine-1,2-dicarboxylate (**3r**)

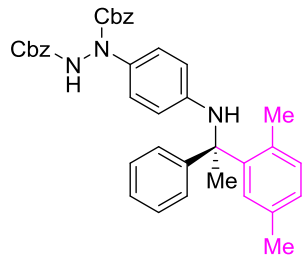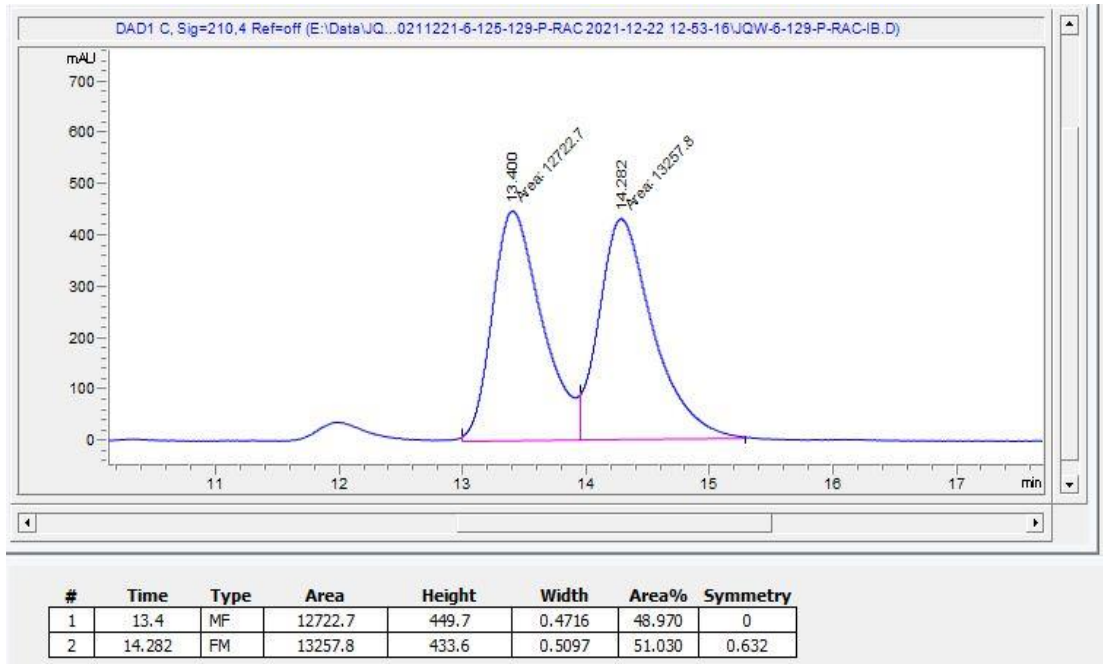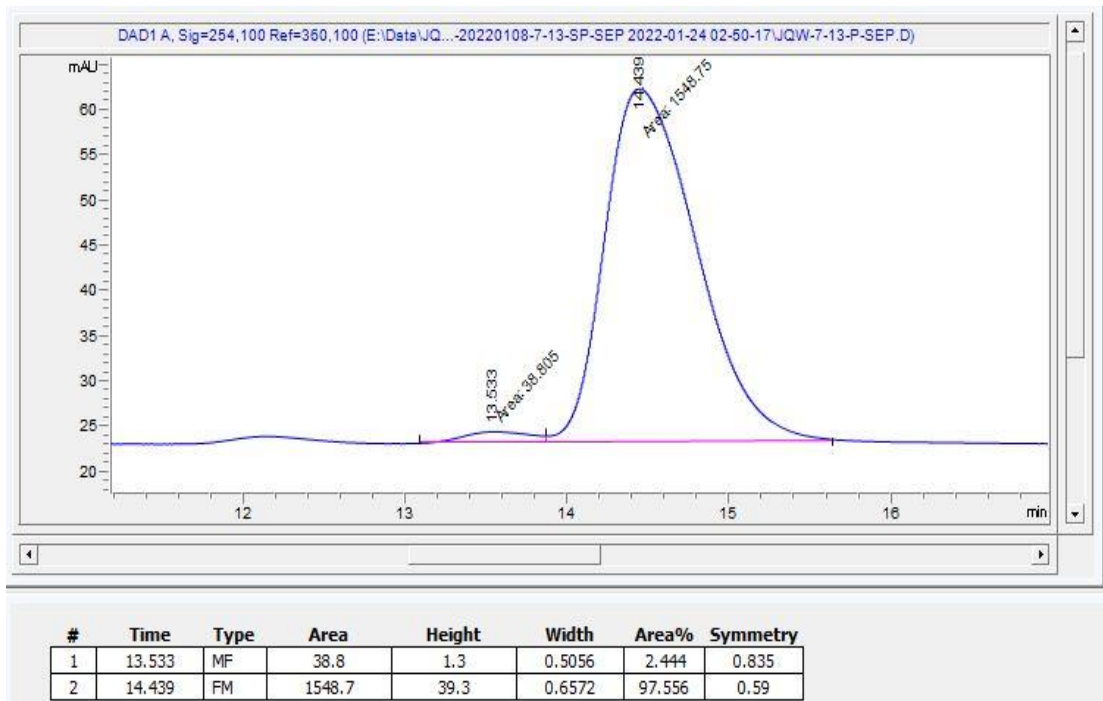

(S)-N-(1-(5-methoxy-2-methylphenyl)-1-phenylethyl)aniline ((S)-1s)

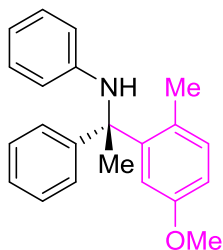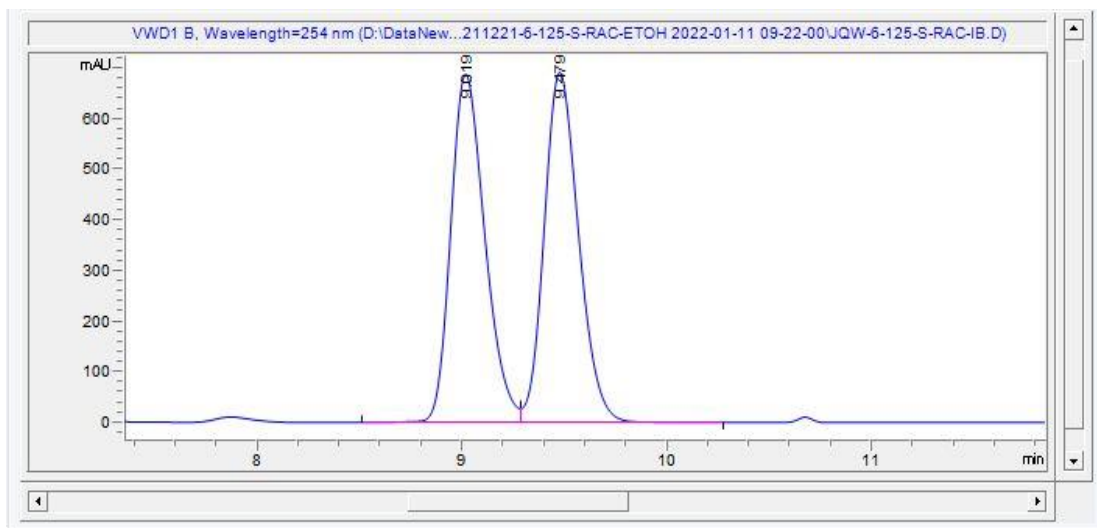

| # | Time  | Type | Area   | Height | Width  | Area%  | Symmetry |
|---|-------|------|--------|--------|--------|--------|----------|
| 1 | 9.019 | BV   | 7958   | 686.2  | 0.1773 | 49.686 | 0.736    |
| 2 | 9.479 | VB   | 8058.5 | 689.6  | 0.1823 | 50.314 | 0.78     |

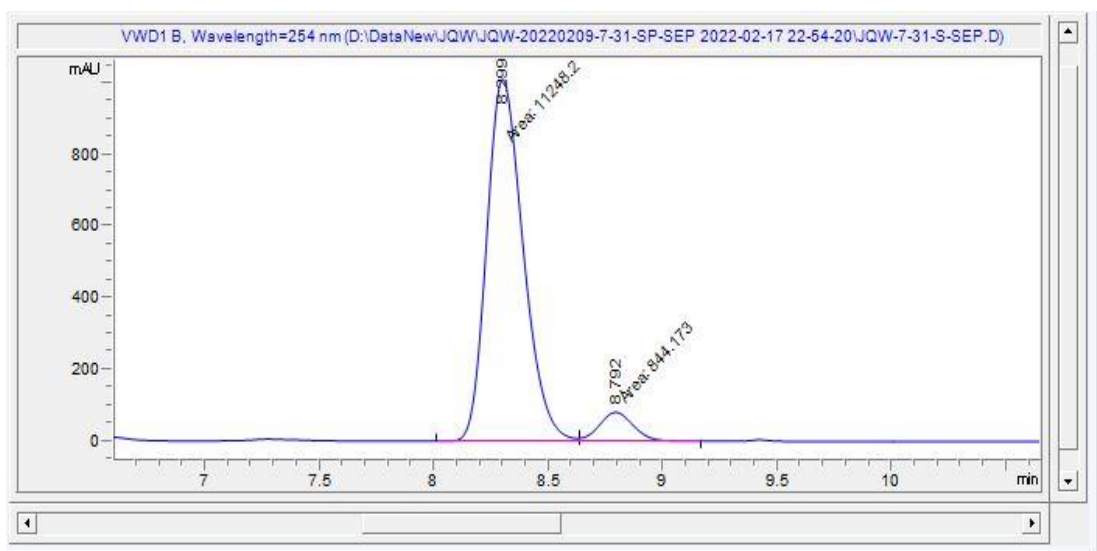

| # | Time  | Type | Area    | Height | Width  | Area%  | Symmetry |
|---|-------|------|---------|--------|--------|--------|----------|
| 1 | 8.299 | MF   | 11248.2 | 1015.6 | 0.1846 | 93.019 | 0.755    |
| 2 | 8.792 | MF   | 844.2   | 81.4   | 0.1729 | 6.981  | 0.892    |

Dibenzyl(*R*)-1-(4-((1-(5-methoxy-2-methylphenyl)-1-phenylethyl)amino)phenyl)hydrazine-1,  
2-di-carboxylate (**3s**)

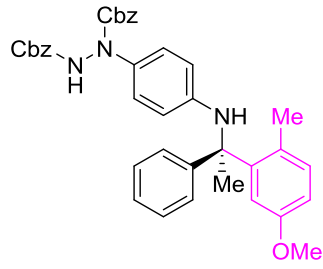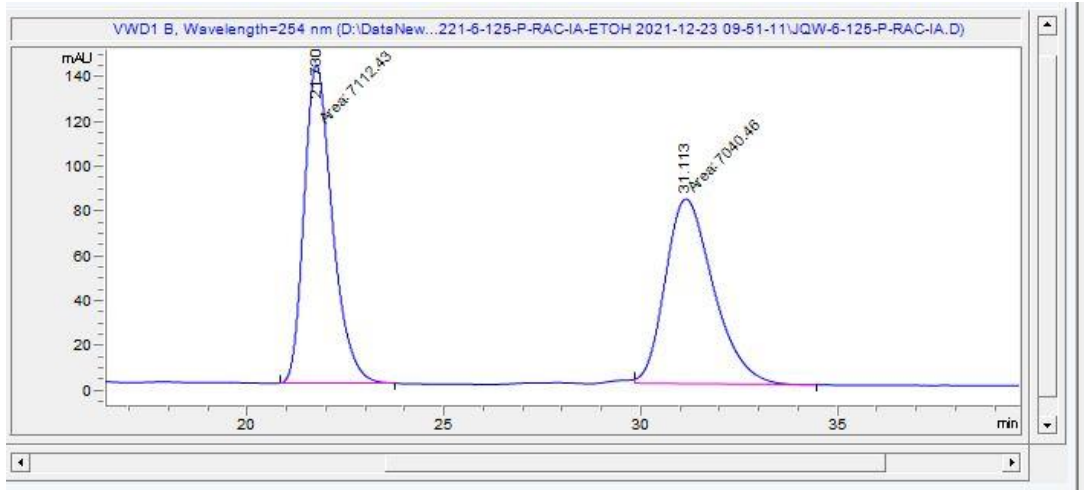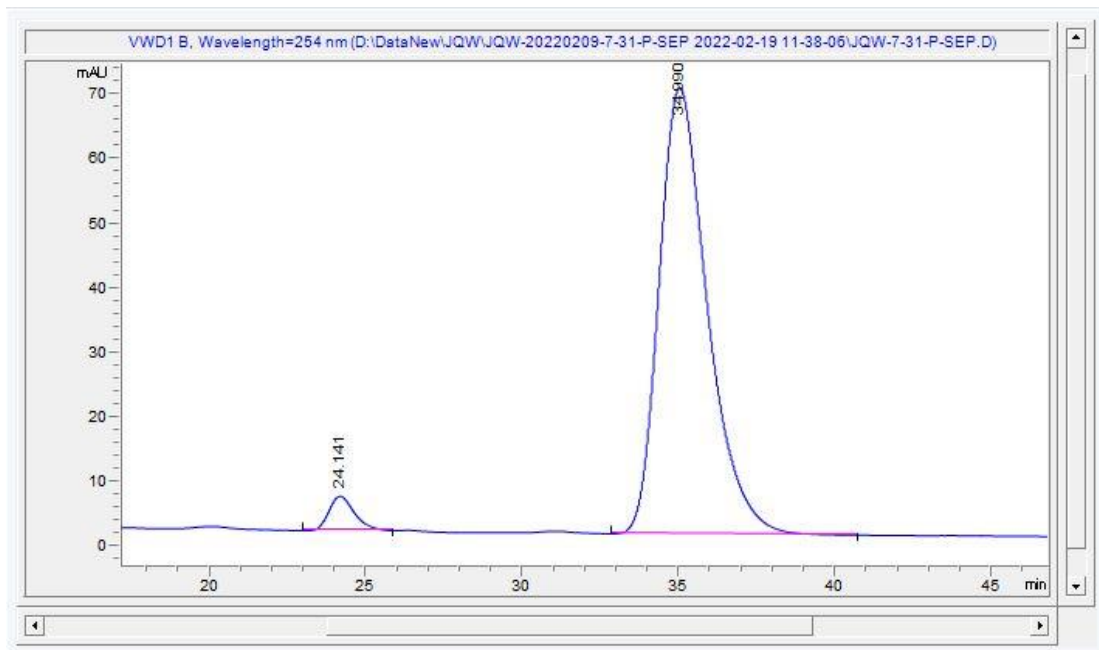

(S)-N-(1-(2-ethylphenyl)-1-phenylethyl)aniline ((S)-1t)

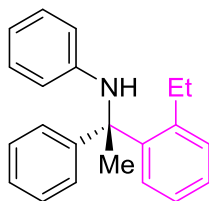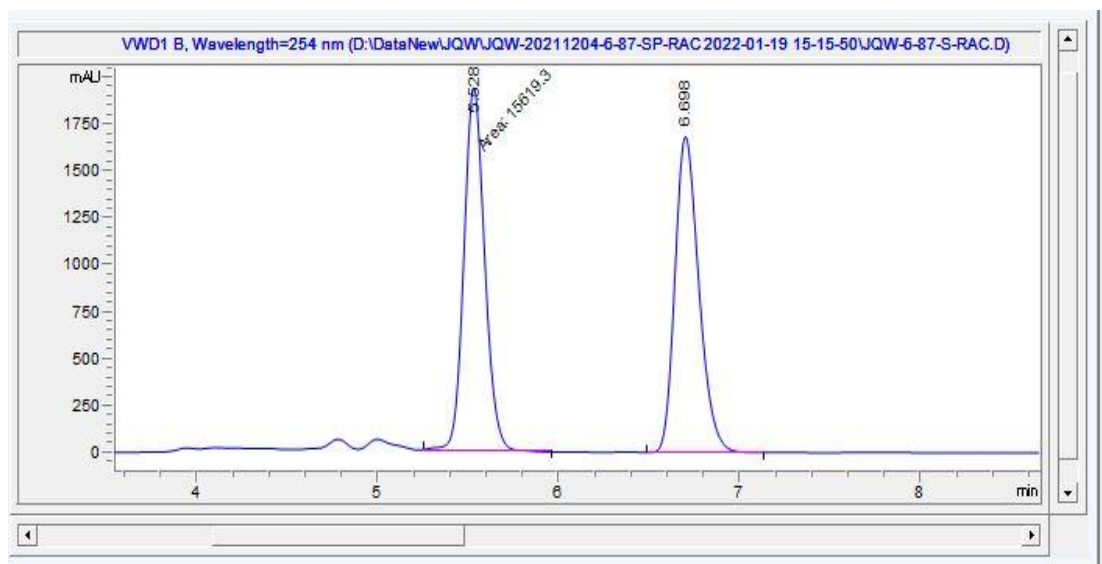

| # | Time  | Type | Area    | Height | Width  | Area%  | Symmetry |
|---|-------|------|---------|--------|--------|--------|----------|
| 1 | 5.528 | FM   | 15619.3 | 1948.9 | 0.1336 | 50.154 | 0.878    |
| 2 | 6.698 | VB   | 15523.1 | 1691.5 | 0.1411 | 49.846 | 0.741    |

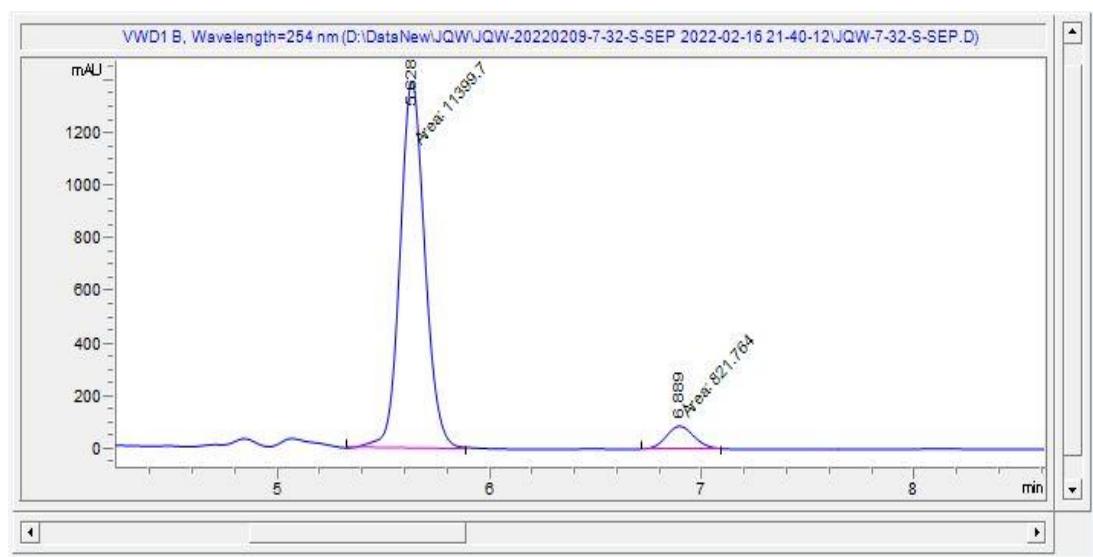

| # | Time  | Type | Area    | Height | Width  | Area%  | Symmetry |
|---|-------|------|---------|--------|--------|--------|----------|
| 1 | 5.628 | MF   | 11399.7 | 1403.5 | 0.1354 | 93.276 | 0.895    |
| 2 | 6.889 | FM   | 821.8   | 88.1   | 0.1554 | 6.724  | 0.878    |

Dibenzyl-(*R*)-1-(4-((1-(2-ethylphenyl)-1-phenylethyl)amino)phenyl)hydrazine-1,2-dicarboxylate (**3f**)

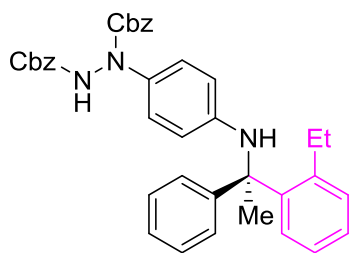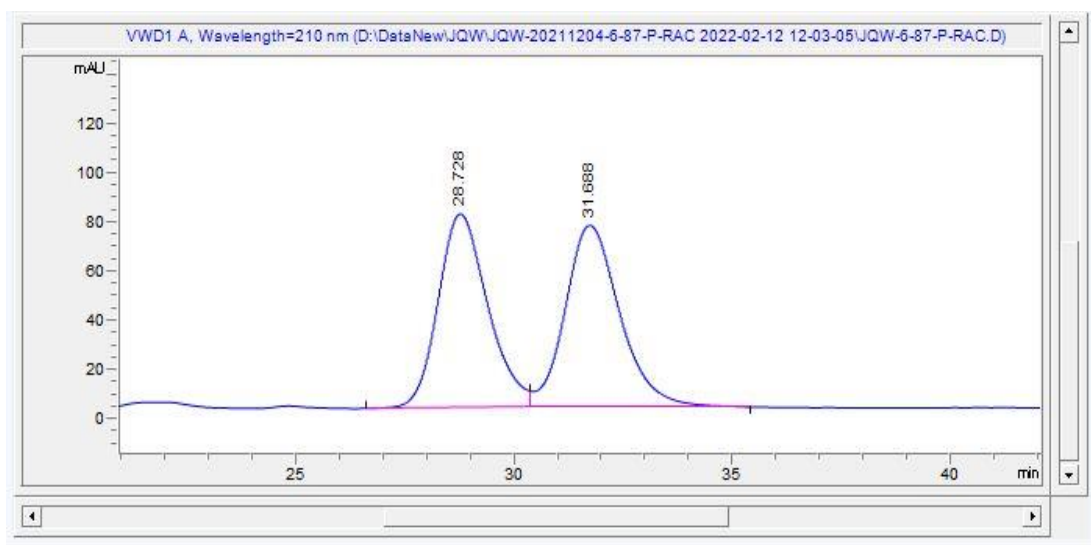

| # | Time   | Type | Area   | Height | Width  | Area%  | Symmetry |
|---|--------|------|--------|--------|--------|--------|----------|
| 1 | 28.728 | BV   | 6250.8 | 78.7   | 1.2149 | 49.224 | 0.77     |
| 2 | 31.688 | VB   | 6447.9 | 73.9   | 1.3235 | 50.776 | 0.771    |

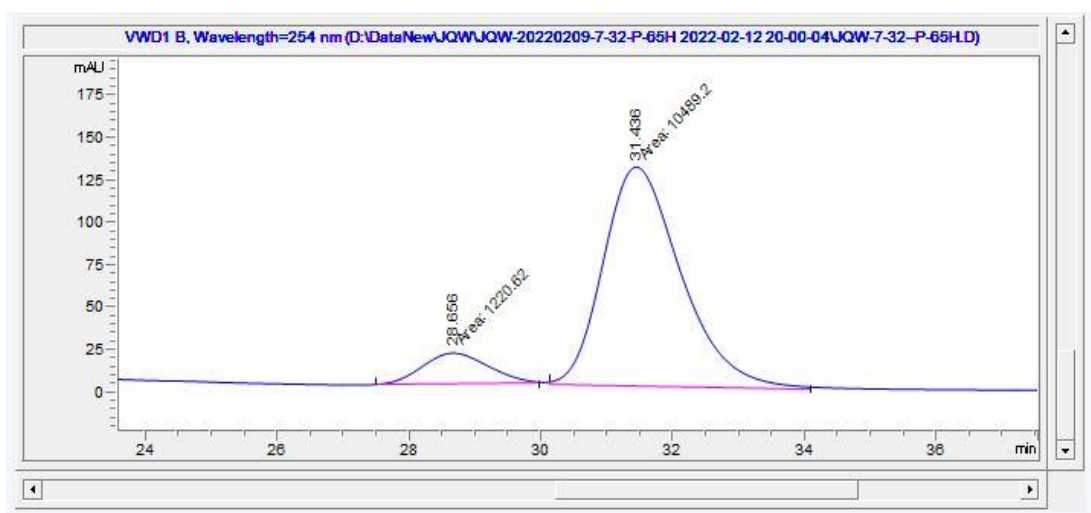

| # | Time   | Type | Area    | Height | Width  | Area%  | Symmetry |
|---|--------|------|---------|--------|--------|--------|----------|
| 1 | 28.656 | MM   | 1220.6  | 17.7   | 1.1466 | 10.424 | 0.859    |
| 2 | 31.436 | MM   | 10489.2 | 128    | 1.3655 | 89.576 | 0.717    |

(S)-N-(1-(naphthalen-1-yl)-1-phenylethyl)aniline ((S)-**1u**)

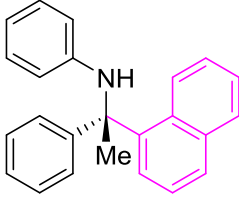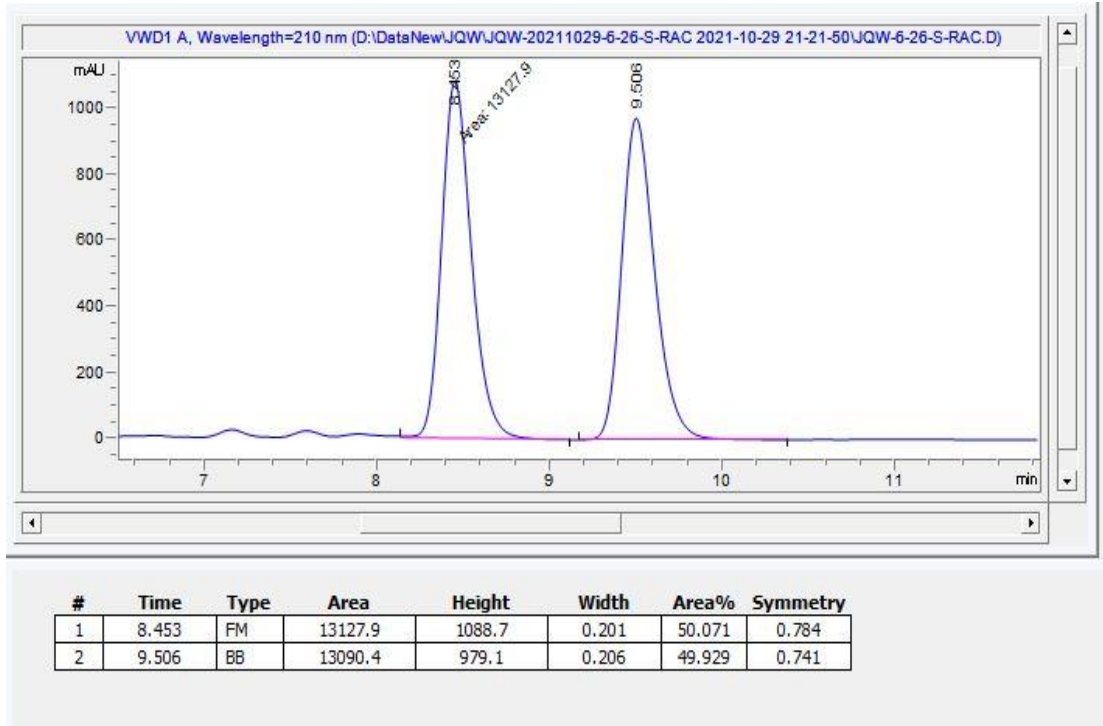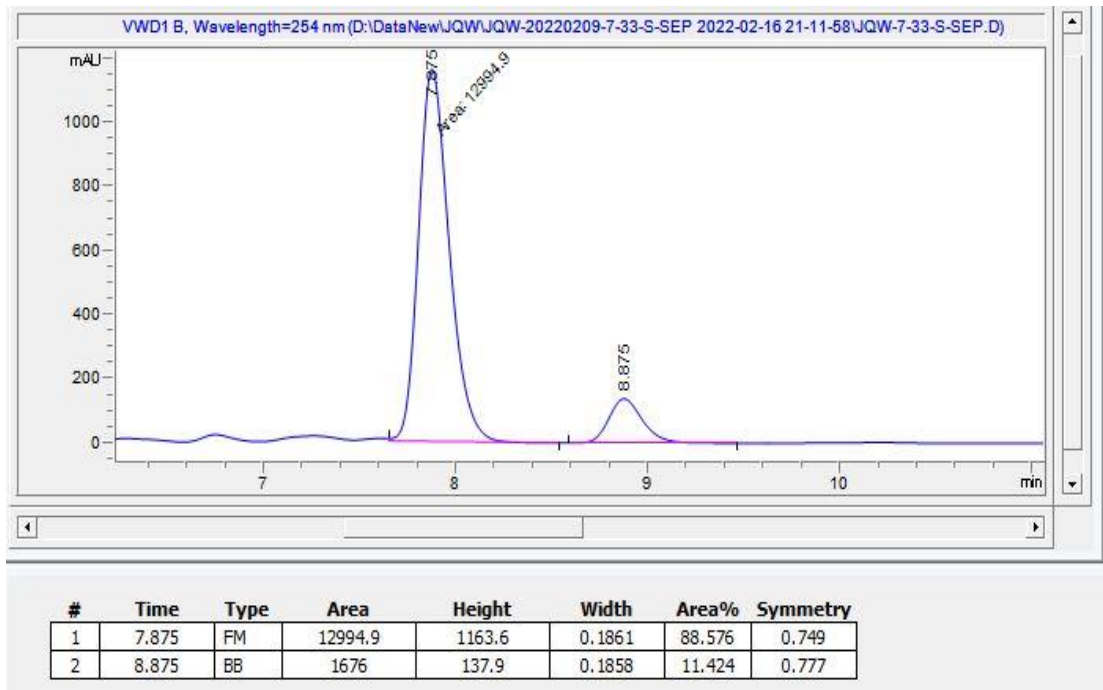

Dibenzyl-(*R*)-1-(4-((1-(naphthalen-1-yl)-1-phenylethyl)amino)phenyl)hydrazine-1,2-dicarboxylate (**3u**)

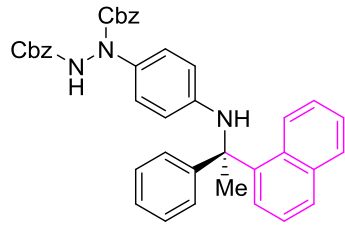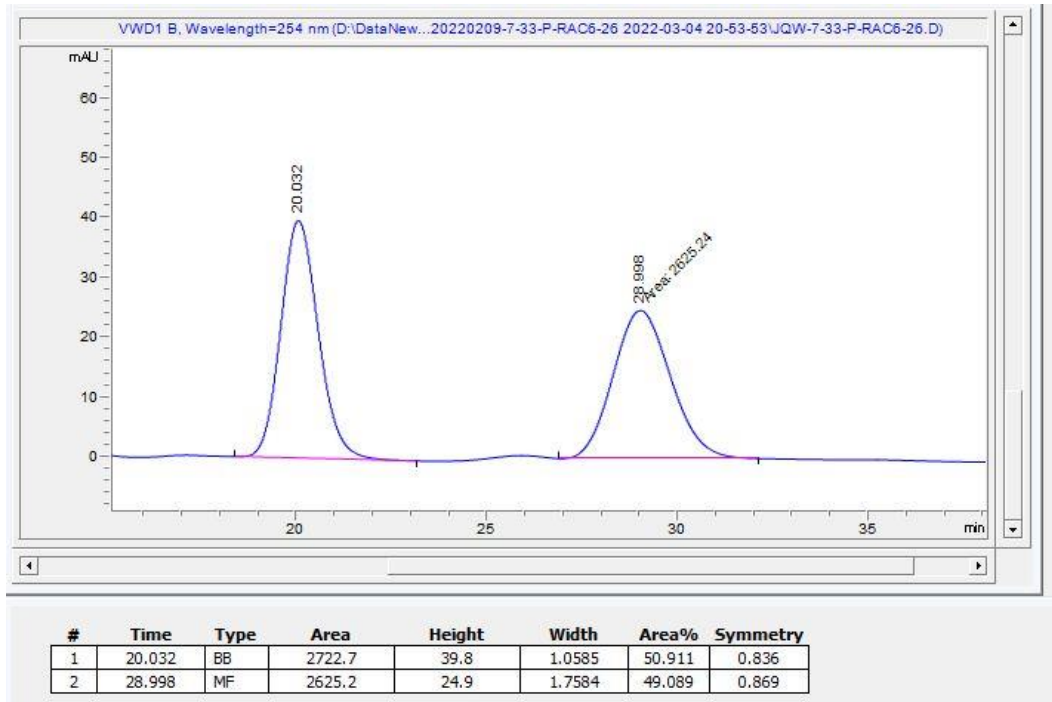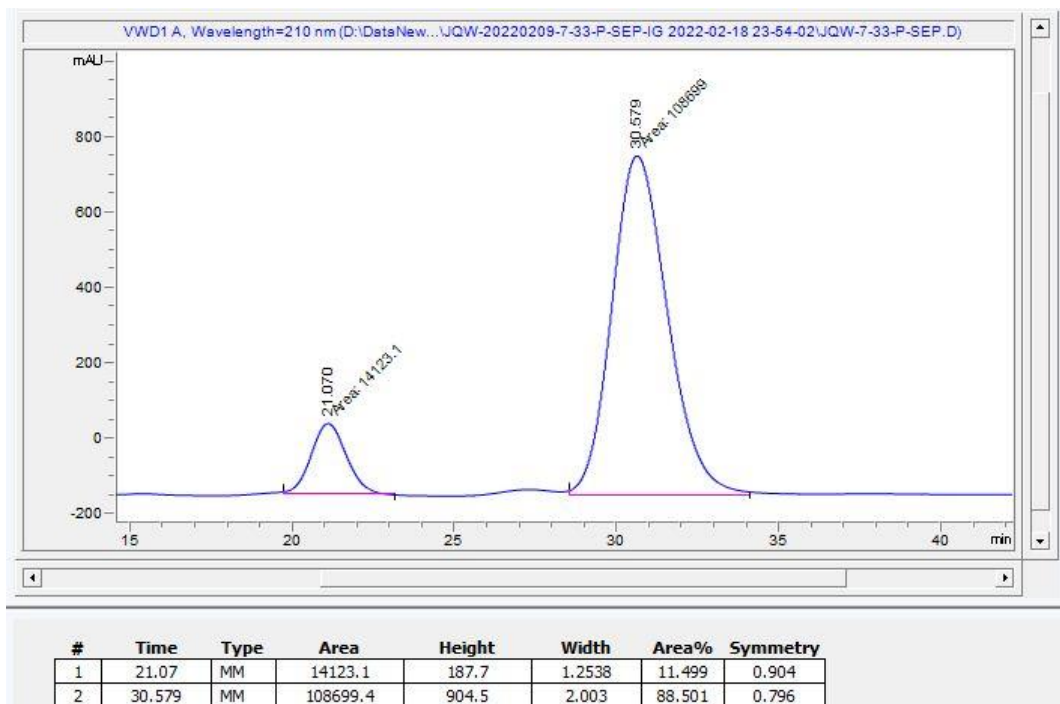

(S)-N-(1-(2-benzylphenyl)-1-phenylethyl)aniline ((S)-1v)

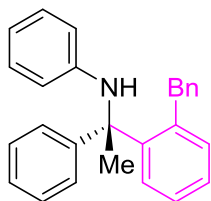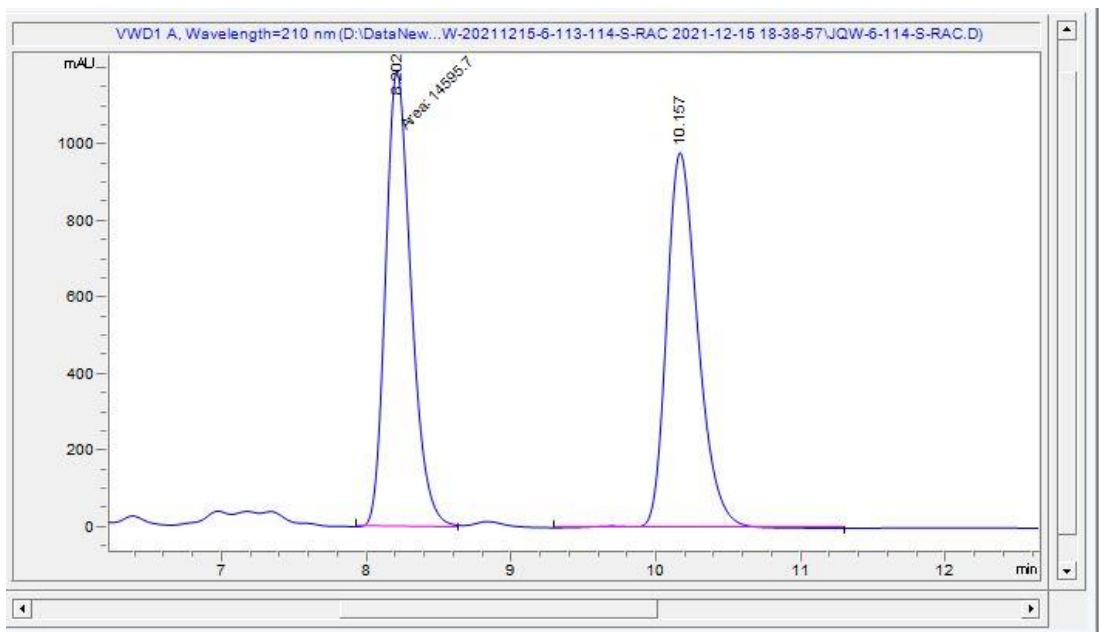

| # | Time   | Type | Area    | Height | Width  | Area%  | Symmetry |
|---|--------|------|---------|--------|--------|--------|----------|
| 1 | 8.202  | MF   | 14595.7 | 1189.8 | 0.2045 | 49.768 | 0.764    |
| 2 | 10.157 | VB R | 14731.6 | 978.2  | 0.2308 | 50.232 | 0.729    |

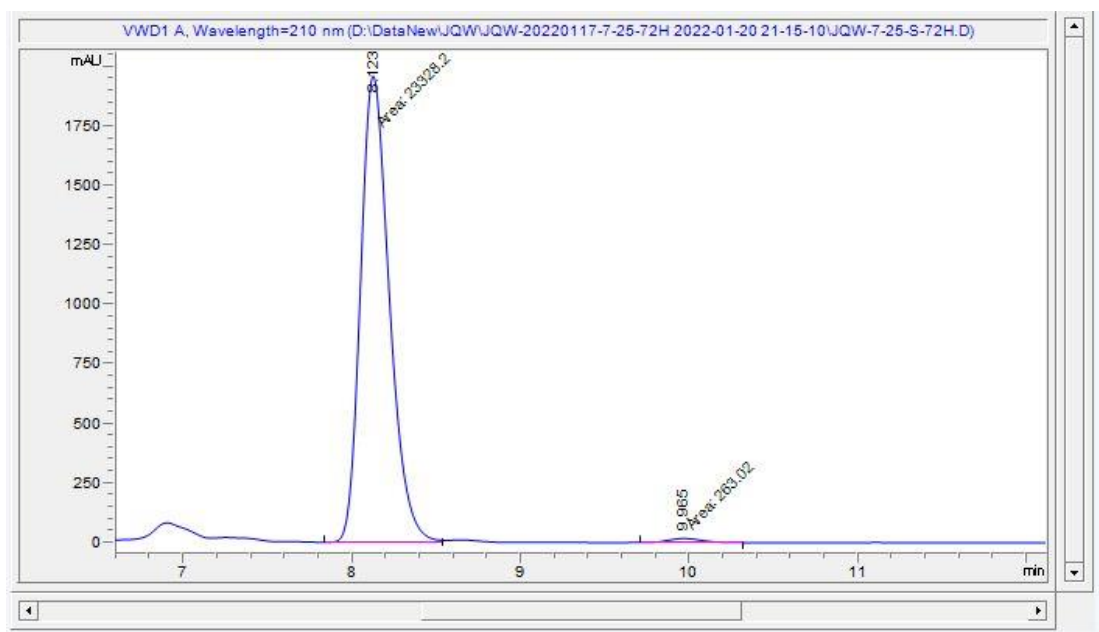

| # | Time  | Type | Area    | Height | Width  | Area%  | Symmetry |
|---|-------|------|---------|--------|--------|--------|----------|
| 1 | 8.123 | MF   | 23328.2 | 1968.4 | 0.1975 | 98.885 | 0.748    |
| 2 | 9.965 | FM   | 263     | 18.3   | 0.2397 | 1.115  | 0.828    |



Dibenzyl-(*R*)-1-(4-((1-(2-benzylphenyl)-1-phenylethyl)amino)phenyl)hydrazine-1,2-dicarboxylate (**3v**)

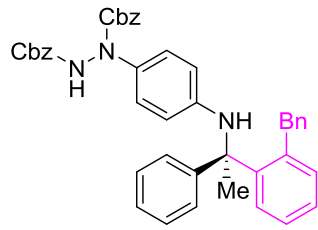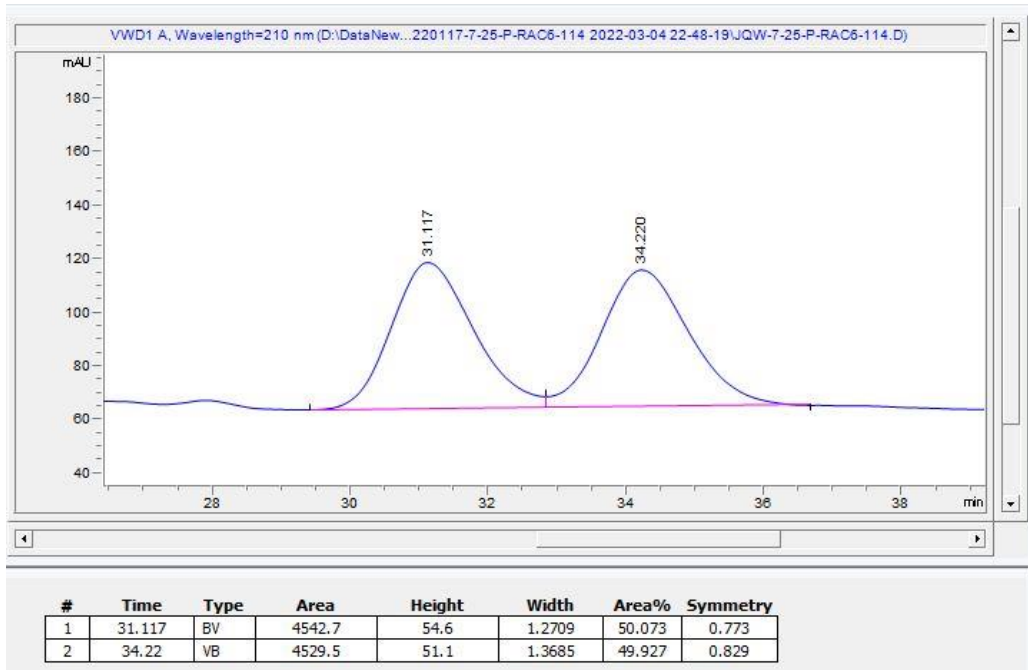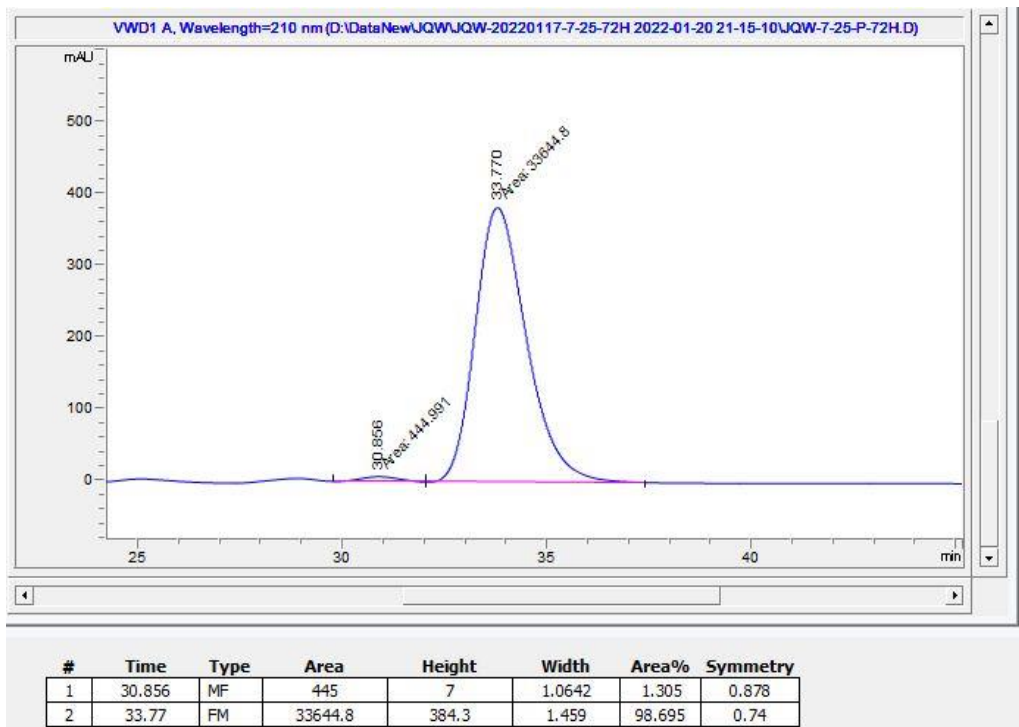

(S)-N-(1-phenyl-1-(o-tolyl)propyl)aniline ((S)-1w)

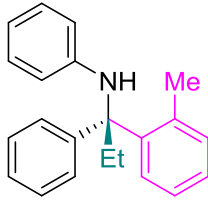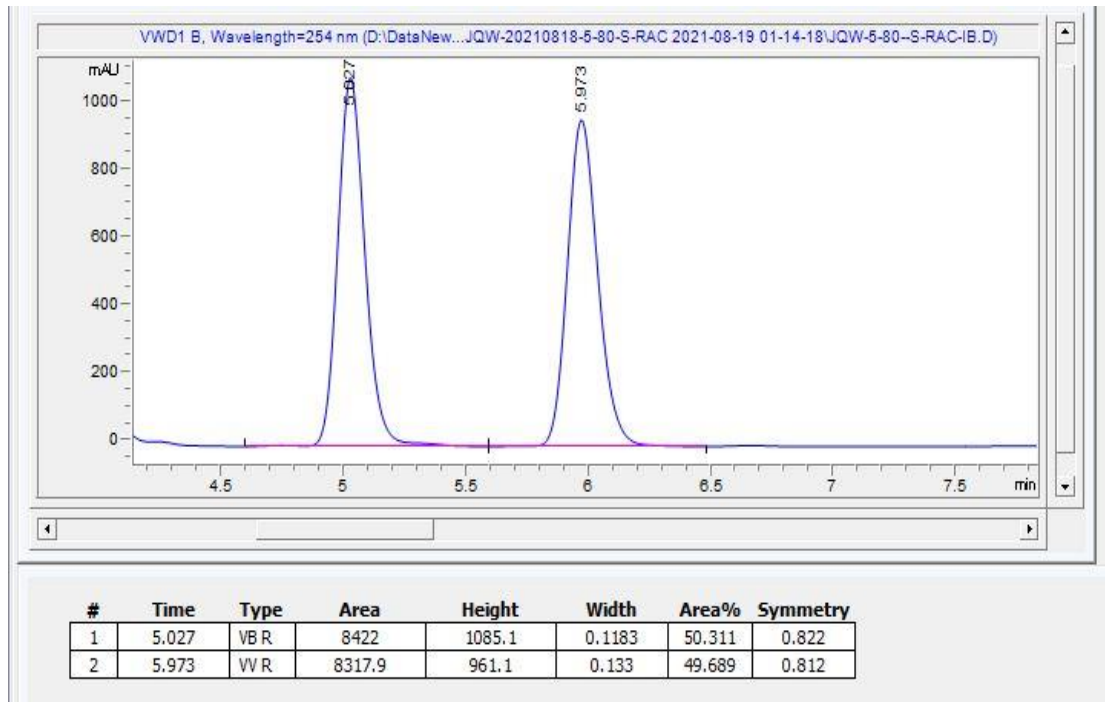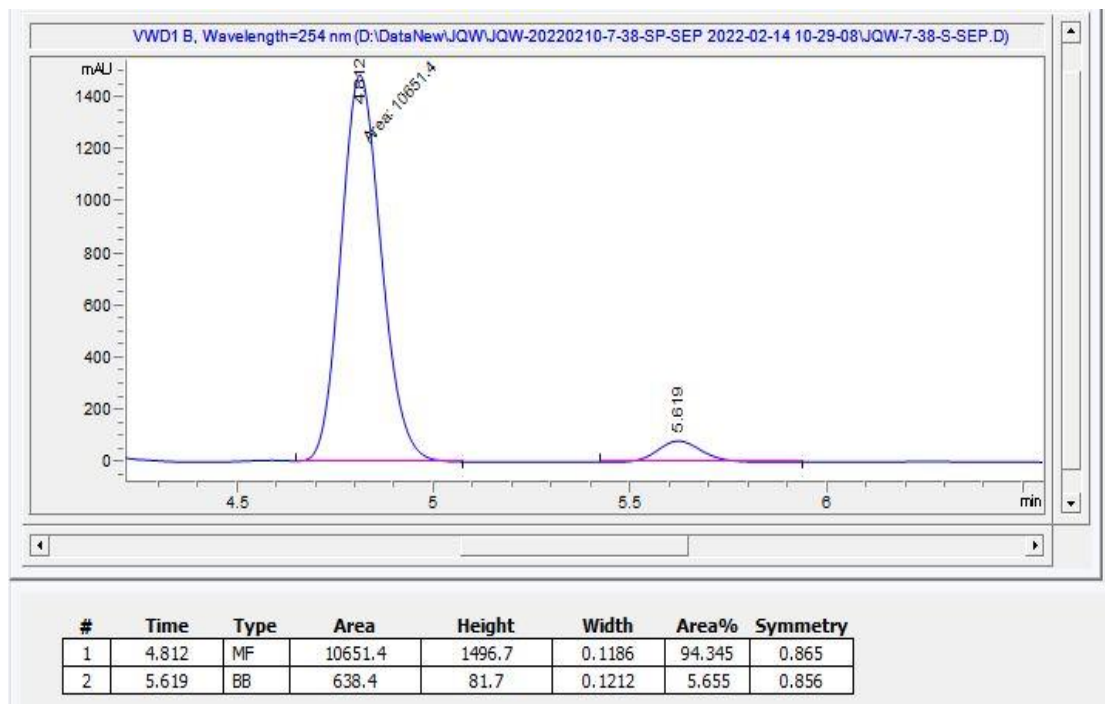

Dibenzyl (R)-1-(4-((1-phenyl-1-(*o*-tolyl)propyl)amino)phenyl)hydrazine-1,2-dicarboxylate  
(3w)

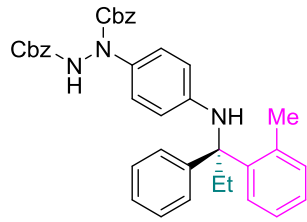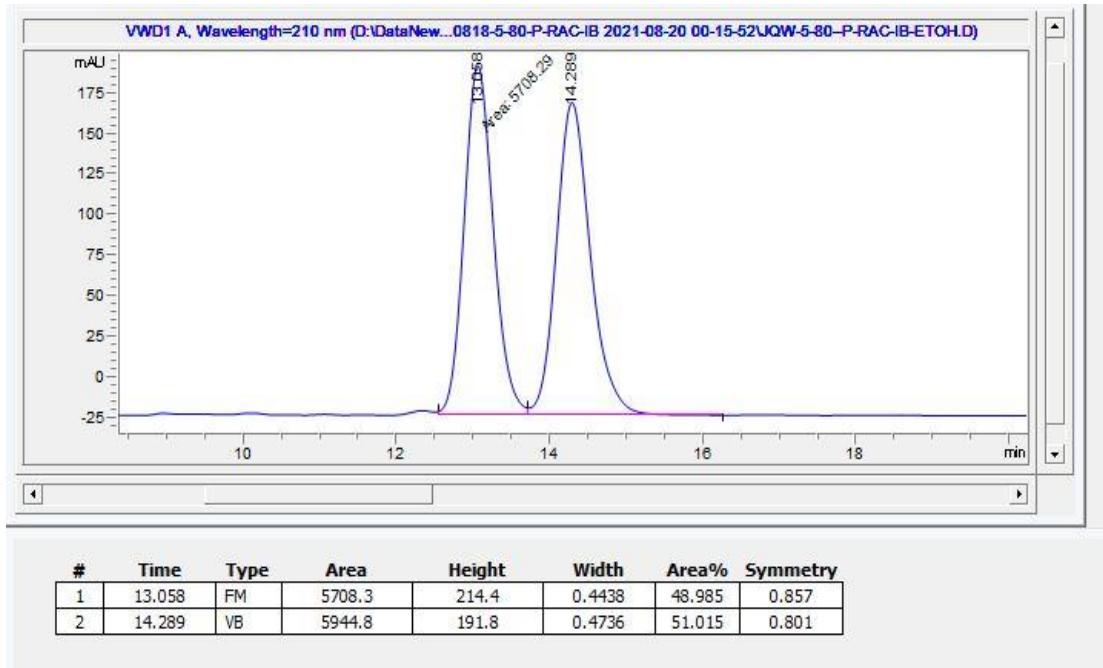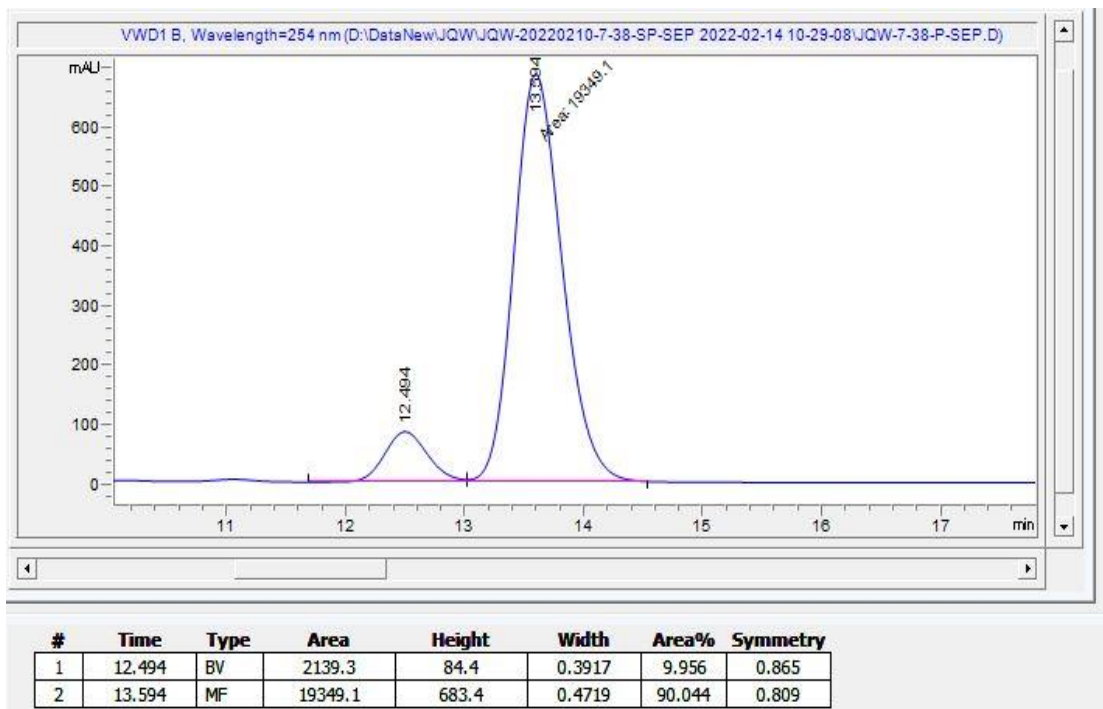

(*S*)-*N*-(1-(2-benzylphenyl)-1-phenylpropyl)aniline ((*S*)-**1x**)

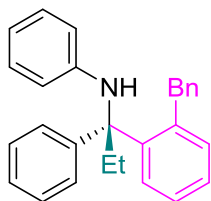

The er value of (*S*)-**1x** was determined by converting it into (*S*)-**3x** through achiral phosphoric acid catalyzed amination with azodicarboxylate **2a**.

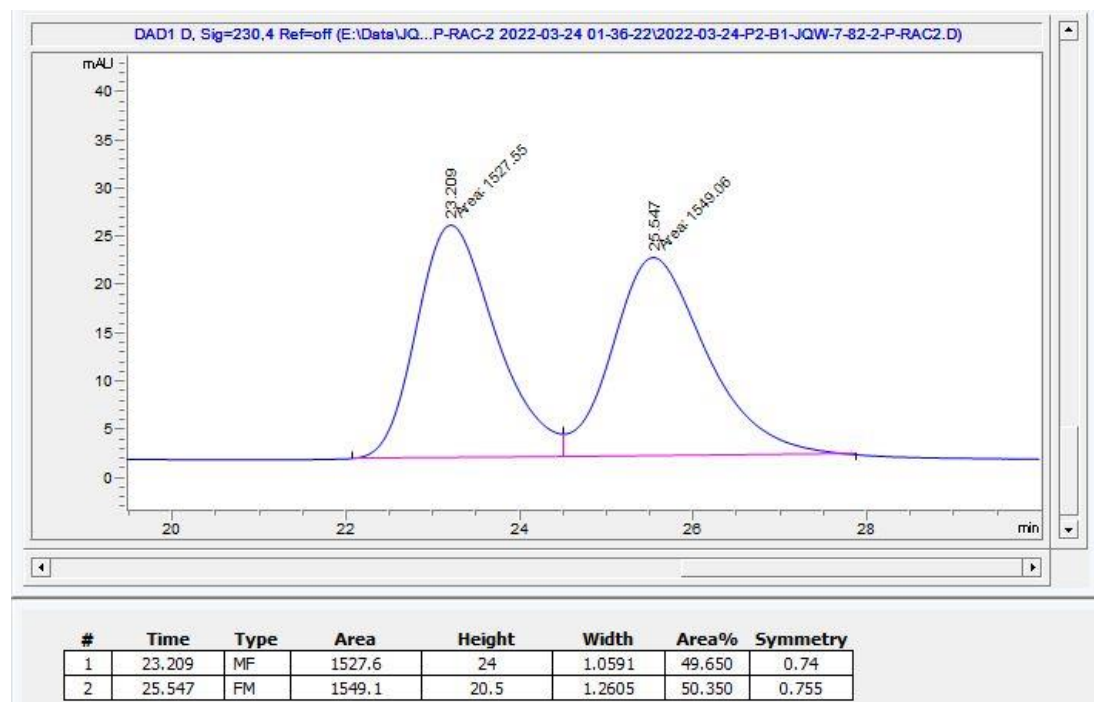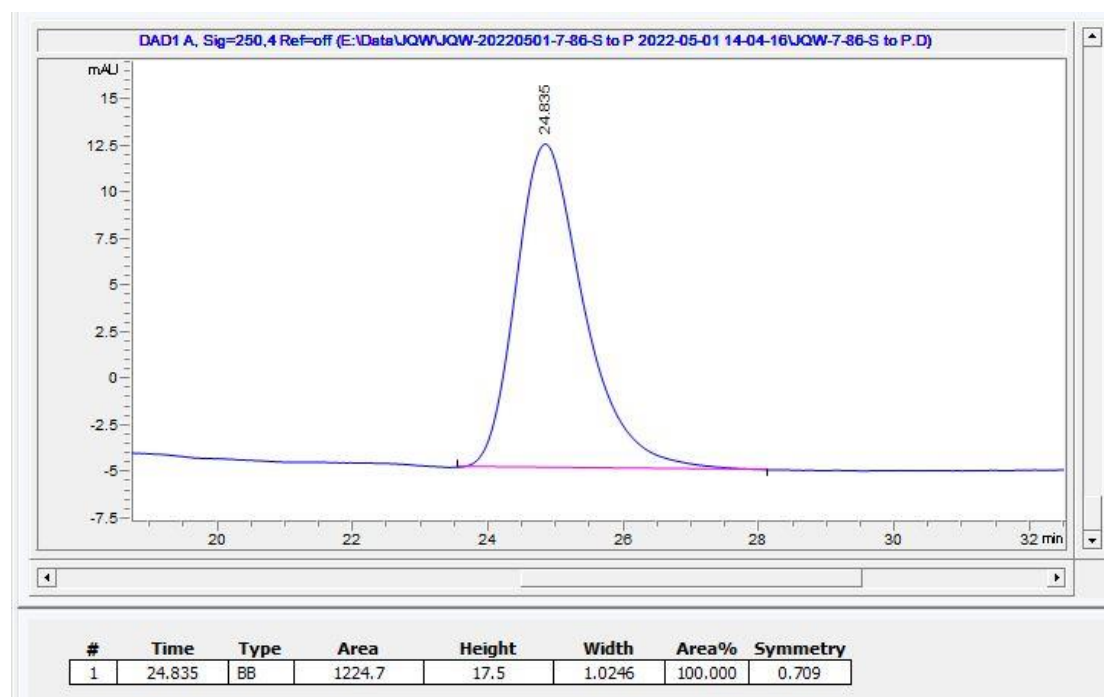

Dibenzyl-(*R*)-1-(4-((1-(2-benzylphenyl)-1-phenylpropyl)amino)phenyl)hydrazine-1,2-dicarboxylate ((*R*)-**3x**)

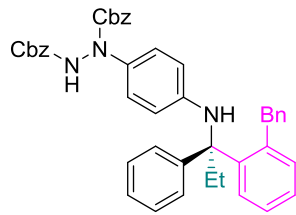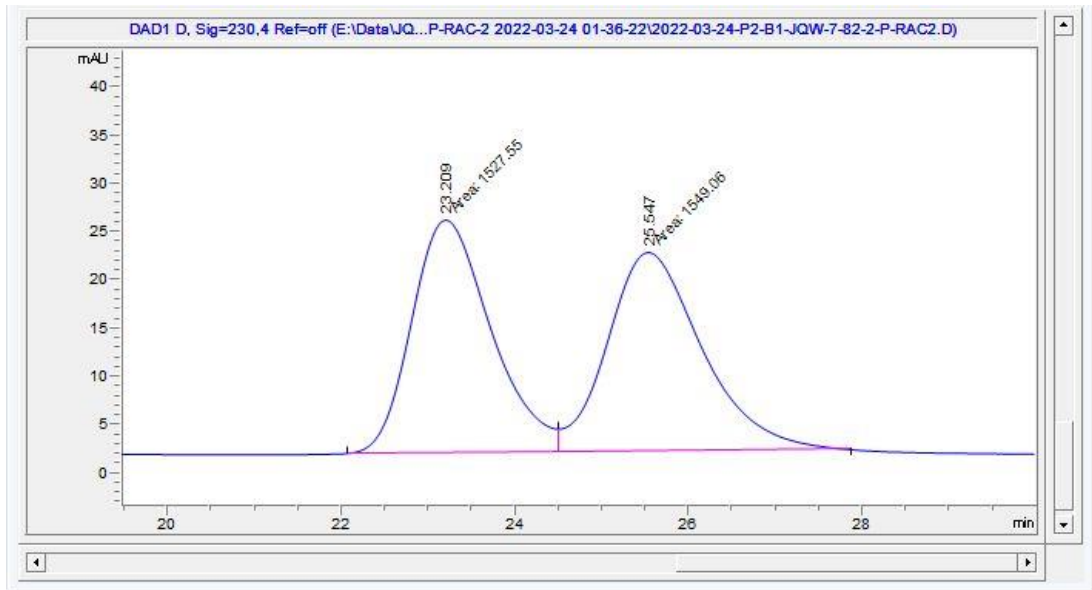

| # | Time   | Type | Area   | Height | Width  | Area%  | Symmetry |
|---|--------|------|--------|--------|--------|--------|----------|
| 1 | 23.209 | MF   | 1527.6 | 24     | 1.0591 | 49.650 | 0.74     |
| 2 | 25.547 | FM   | 1549.1 | 20.5   | 1.2605 | 50.350 | 0.755    |

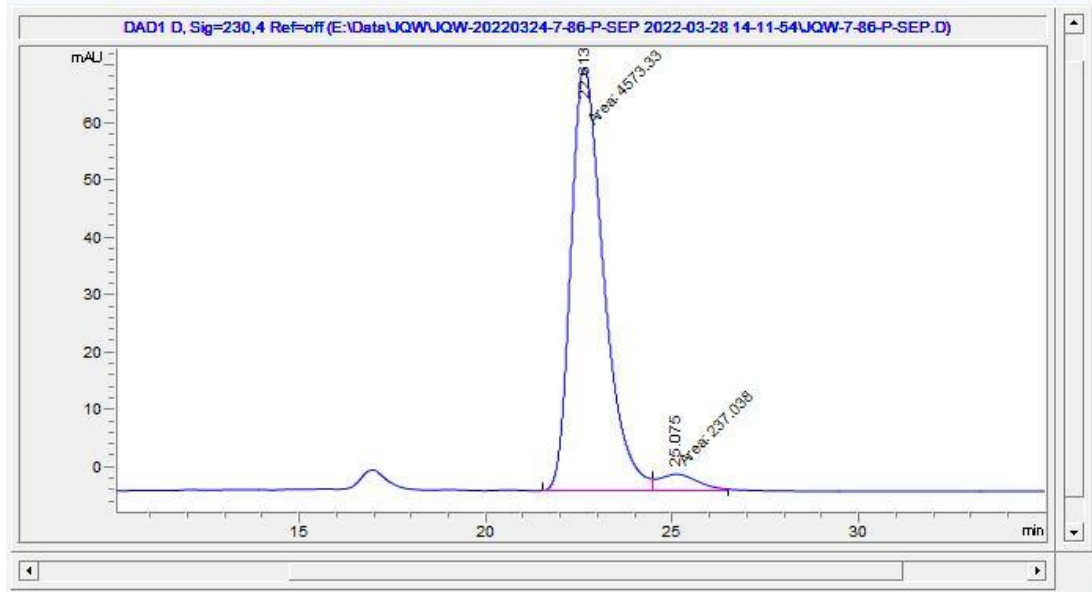

| # | Time   | Type | Area   | Height | Width  | Area%  | Symmetry |
|---|--------|------|--------|--------|--------|--------|----------|
| 1 | 22.613 | MF   | 4573.3 | 74     | 1.0294 | 95.072 | 0        |
| 2 | 25.075 | FM   | 237    | 3.1    | 1.2565 | 4.928  | 0.67     |

(*S*)-*N*-(1-(2-benzylphenyl)-1-phenylpentyl)aniline ((*S*)-**1y**)

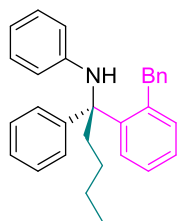

The er value of (*S*)-**1y** was determined by converting it into (*S*)-**3y** through achiral phosphoric acid catalyzed amination with azodicarboxylate **2a**.

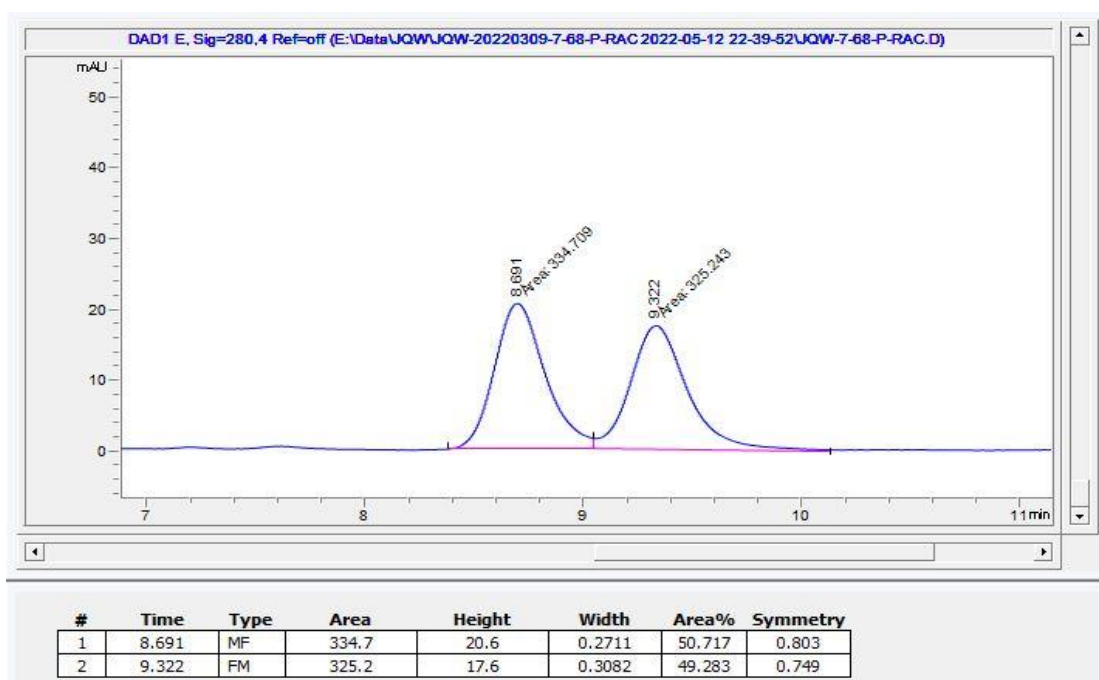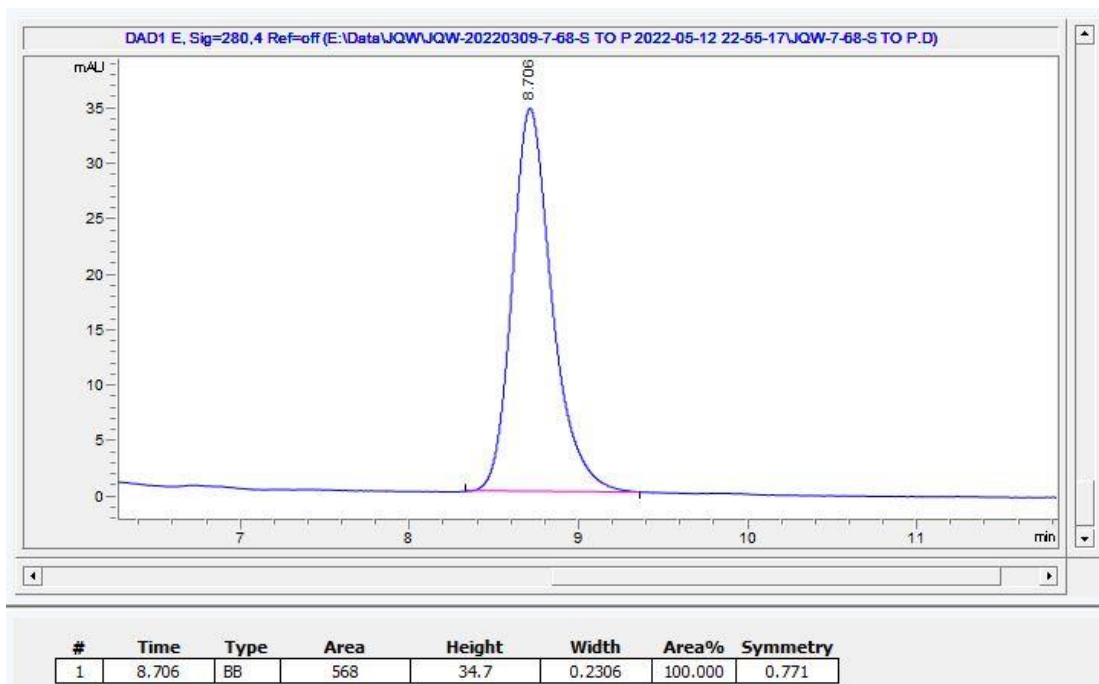

Dibenzyl-(*R*)-1-(4-((1-(2-benzylphenyl)-1-phenylpentyl)amino)phenyl)hydrazine-1,2-dicarboxylate (**3y**)

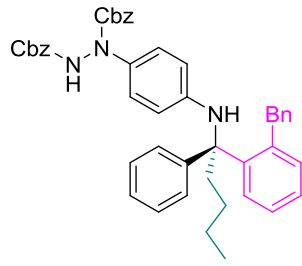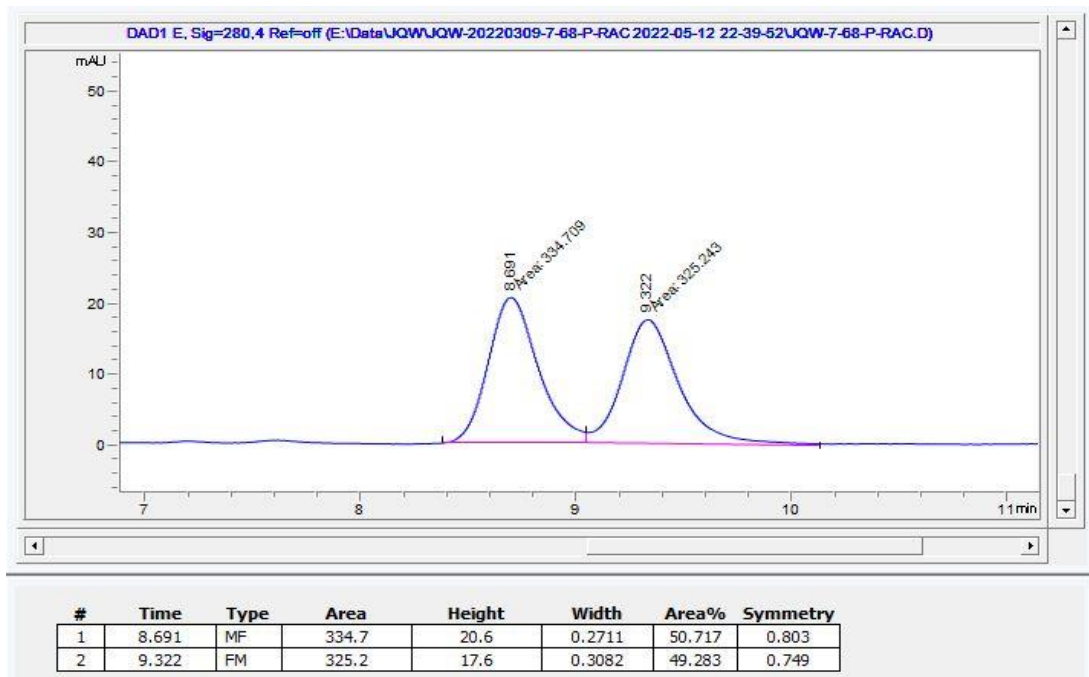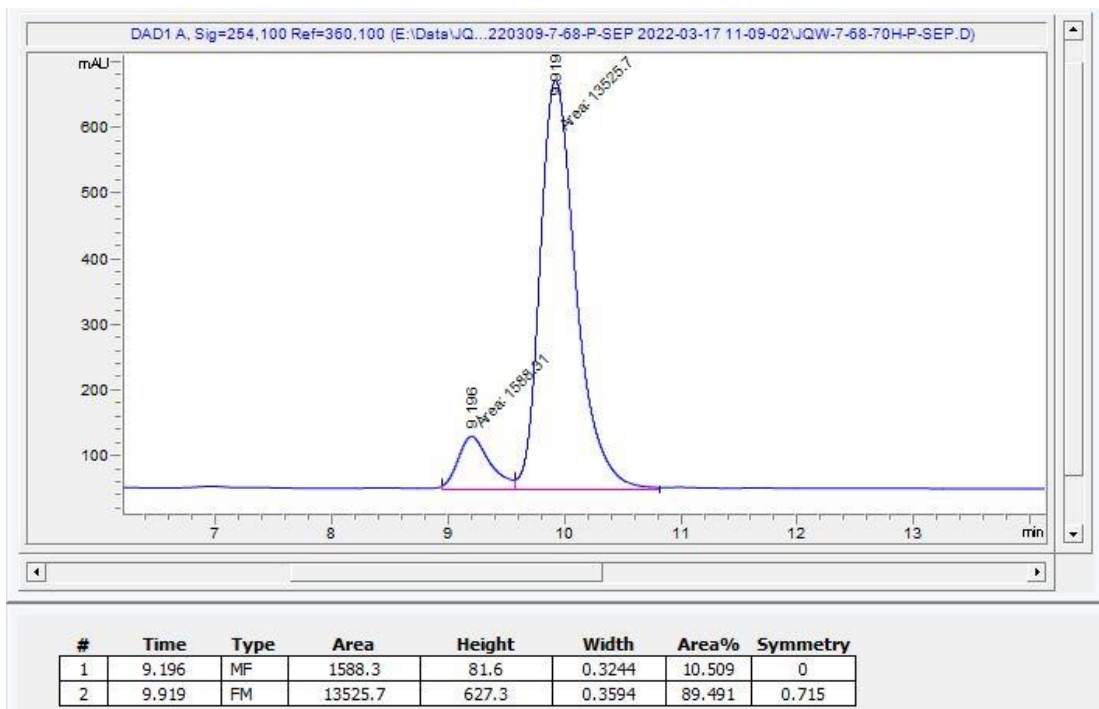

(R)-N-(1-phenyl-1-(*o*-tolyl)ethyl)aniline ((R)-1a)

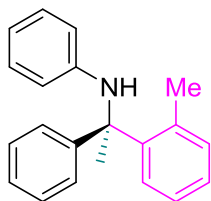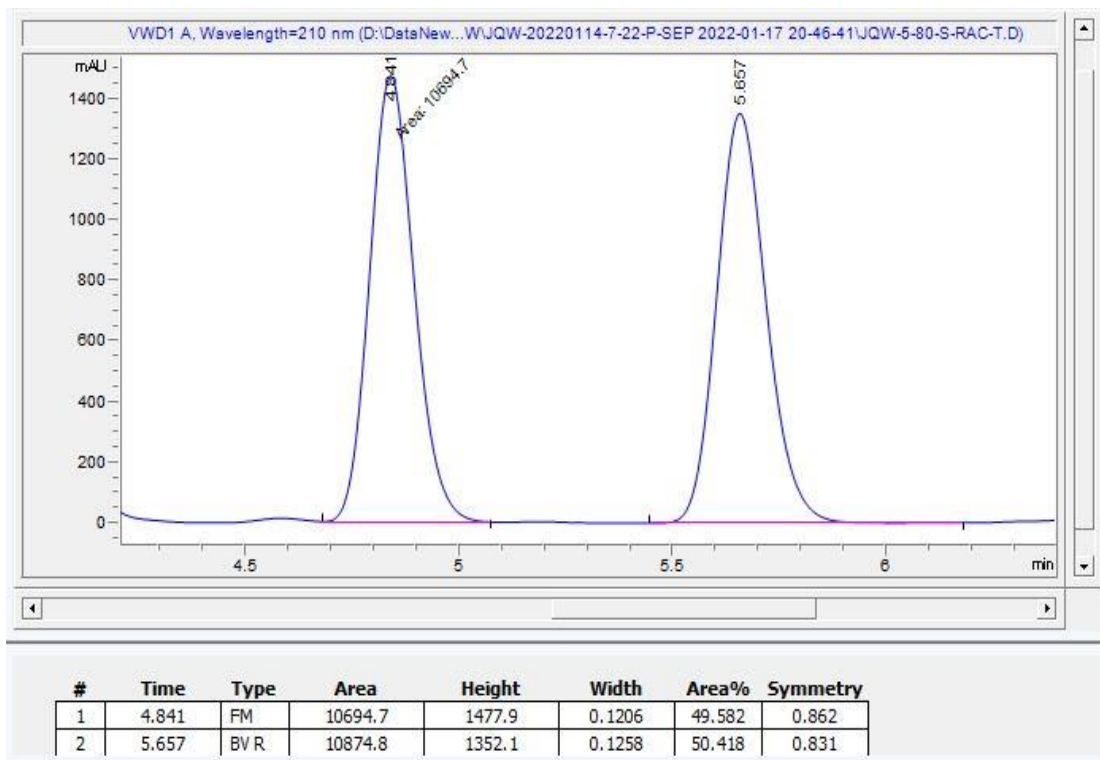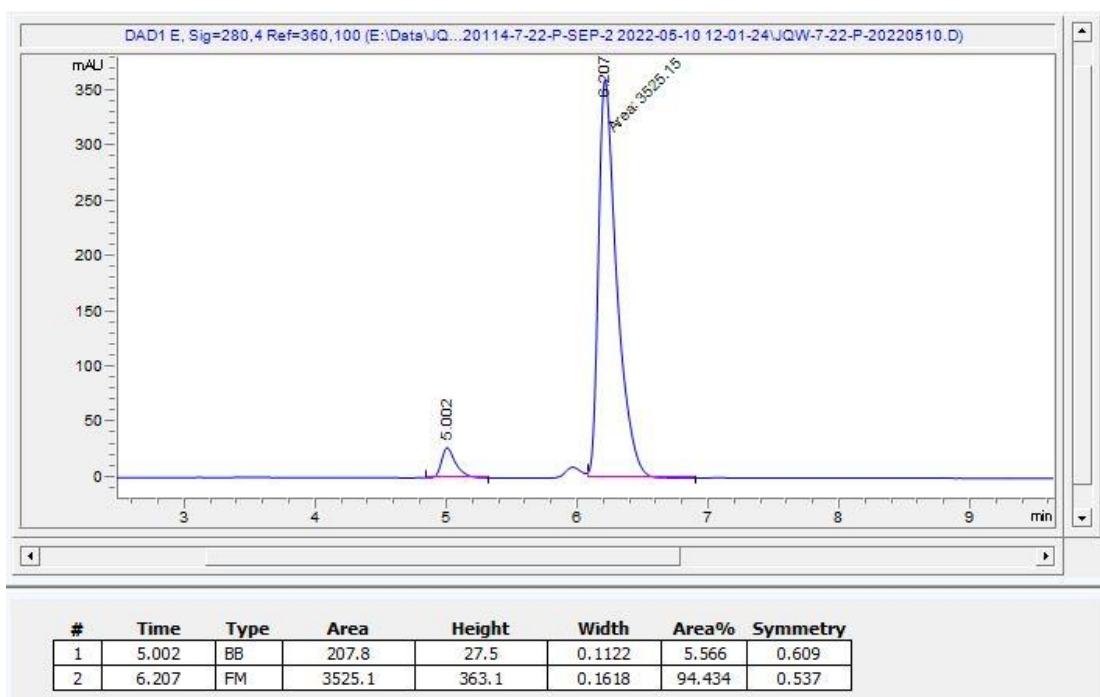



Benzyl (*R*)-4-((1-phenyl-1-(*o*-tolyl)ethyl)amino)phenyl)carbamate (**4a**)

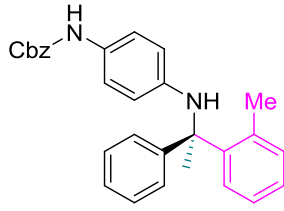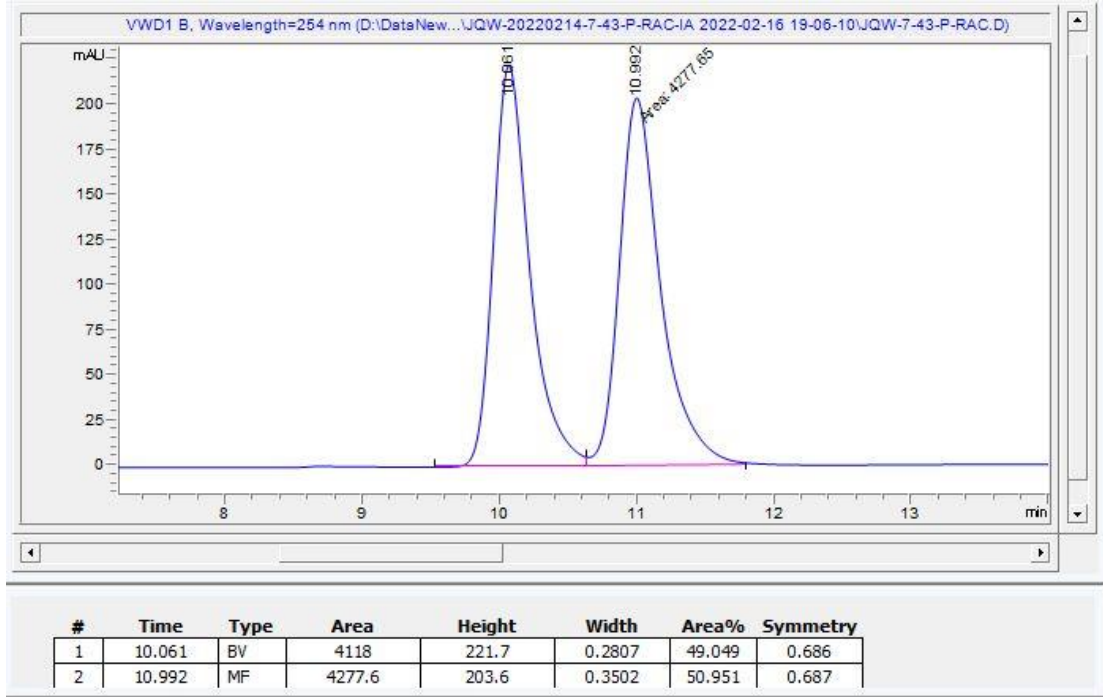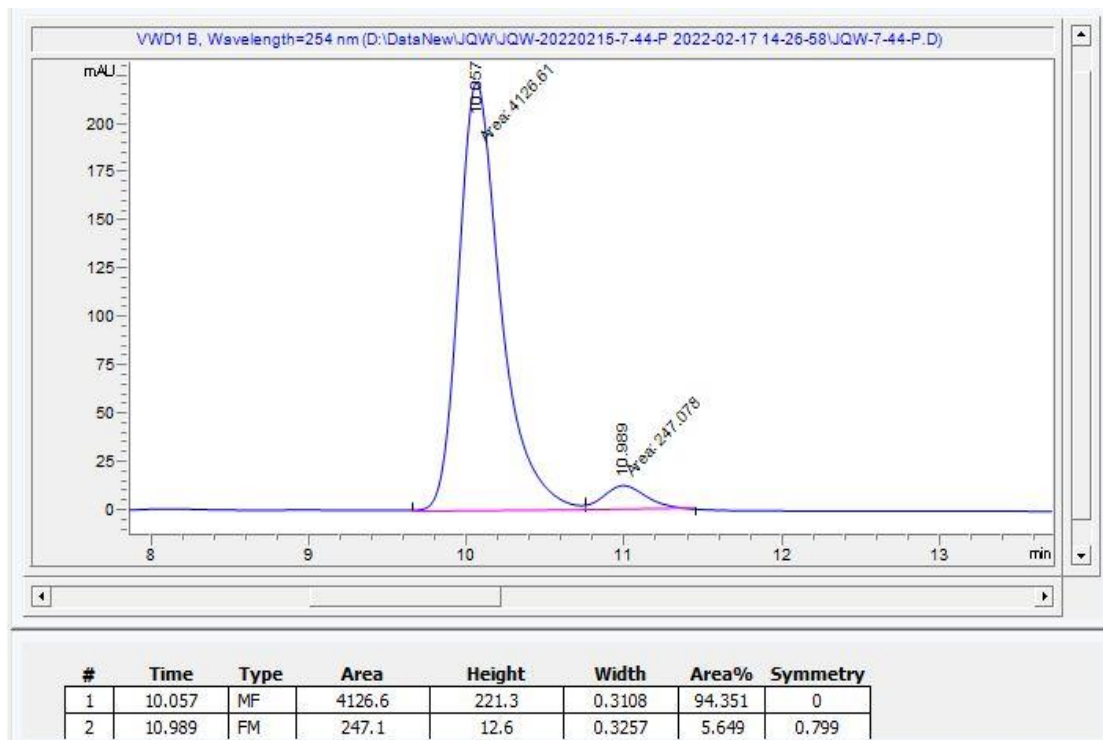

(R)-4-bromo-N-(1-phenyl-1-(o-tolyl)ethyl)aniline (**5a**)

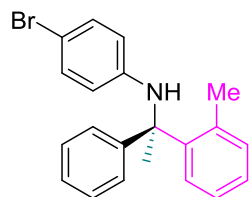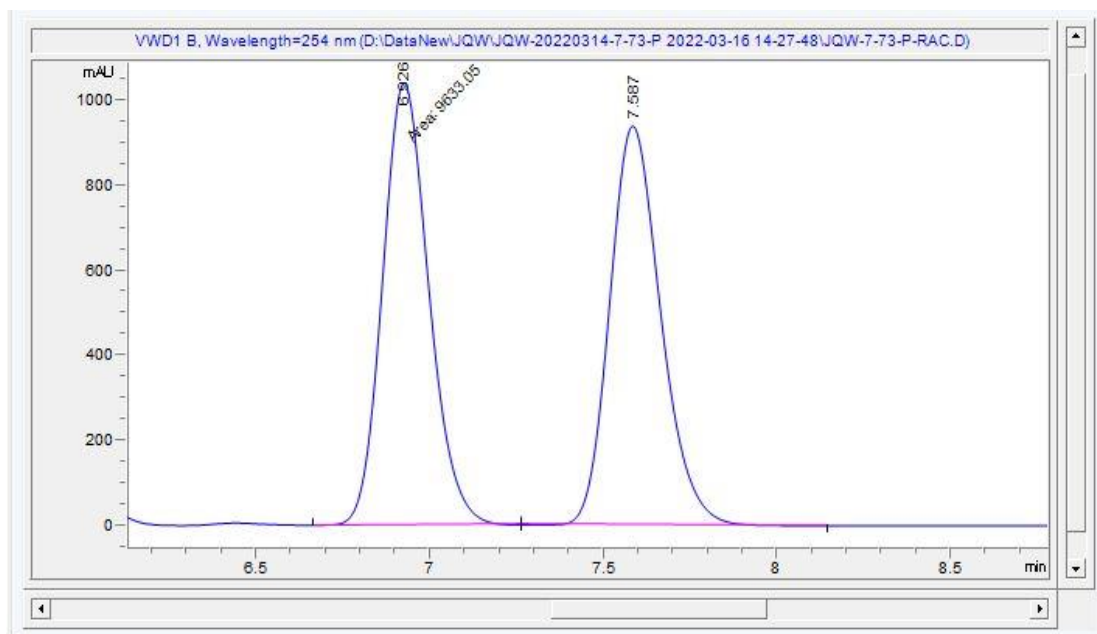

| # | Time  | Type | Area   | Height | Width  | Area%  | Symmetry |
|---|-------|------|--------|--------|--------|--------|----------|
| 1 | 6.926 | FM   | 9633.1 | 1037   | 0.1548 | 50.092 | 0.842    |
| 2 | 7.587 | BB   | 9597.5 | 935.4  | 0.1577 | 49.908 | 0.784    |

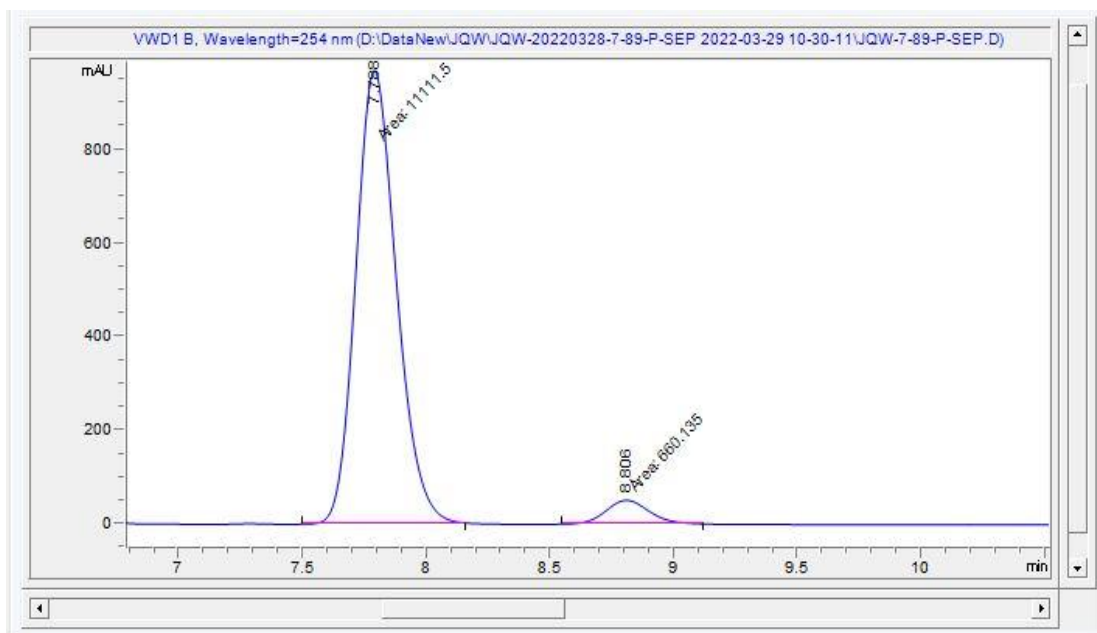

| # | Time  | Type | Area    | Height | Width  | Area%  | Symmetry |
|---|-------|------|---------|--------|--------|--------|----------|
| 1 | 7.788 | FM   | 11111.5 | 971.9  | 0.1906 | 94.392 | 0.814    |
| 2 | 8.806 | FM   | 660.1   | 52     | 0.2117 | 5.608  | 0.868    |

# NMR spectra:

## (S)-N-(1-phenyl-1-(o-tolyl)ethyl)aniline ((S)-1a)

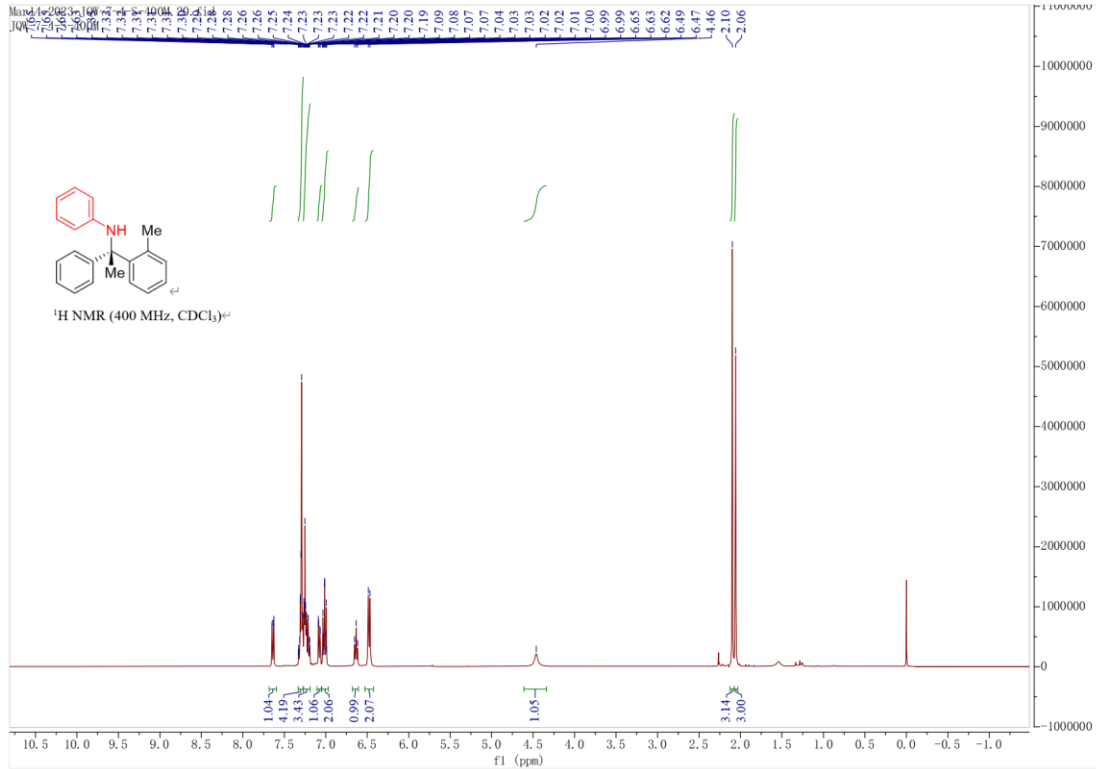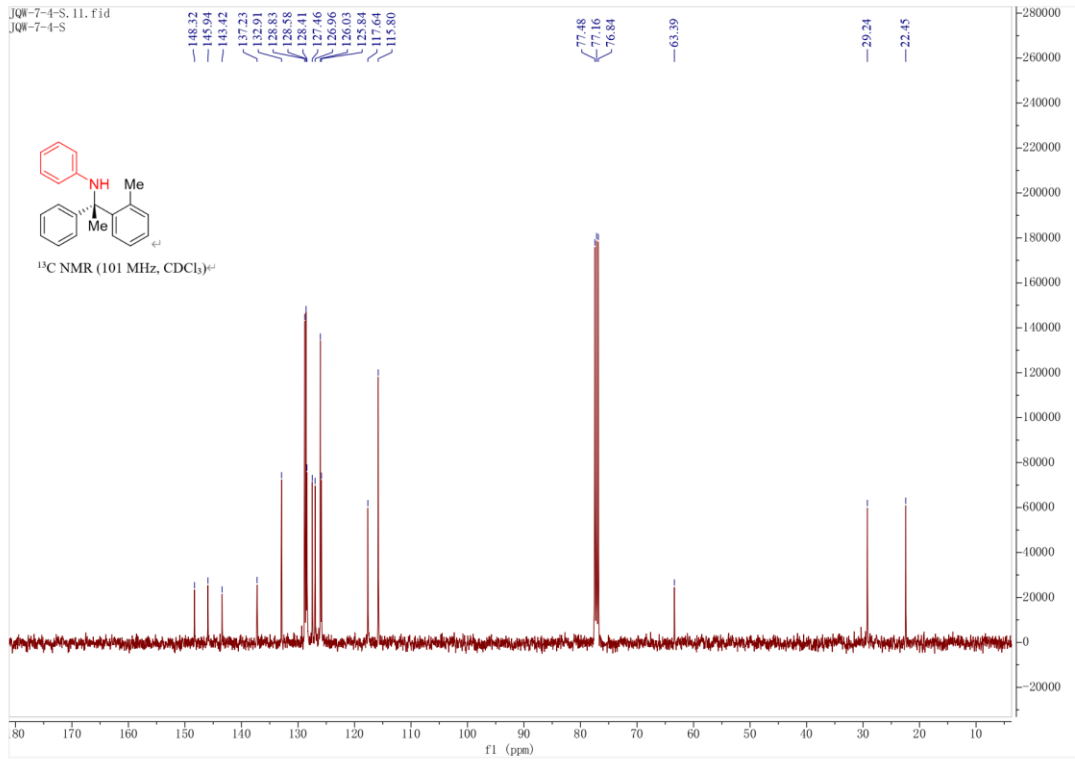

Dibenzyl(R)-1-(4-((1-phenyl-1-(*o*-tolyl)ethyl)amino)phenyl)hydrazine-1,2-dicarboxylat (**3a**)

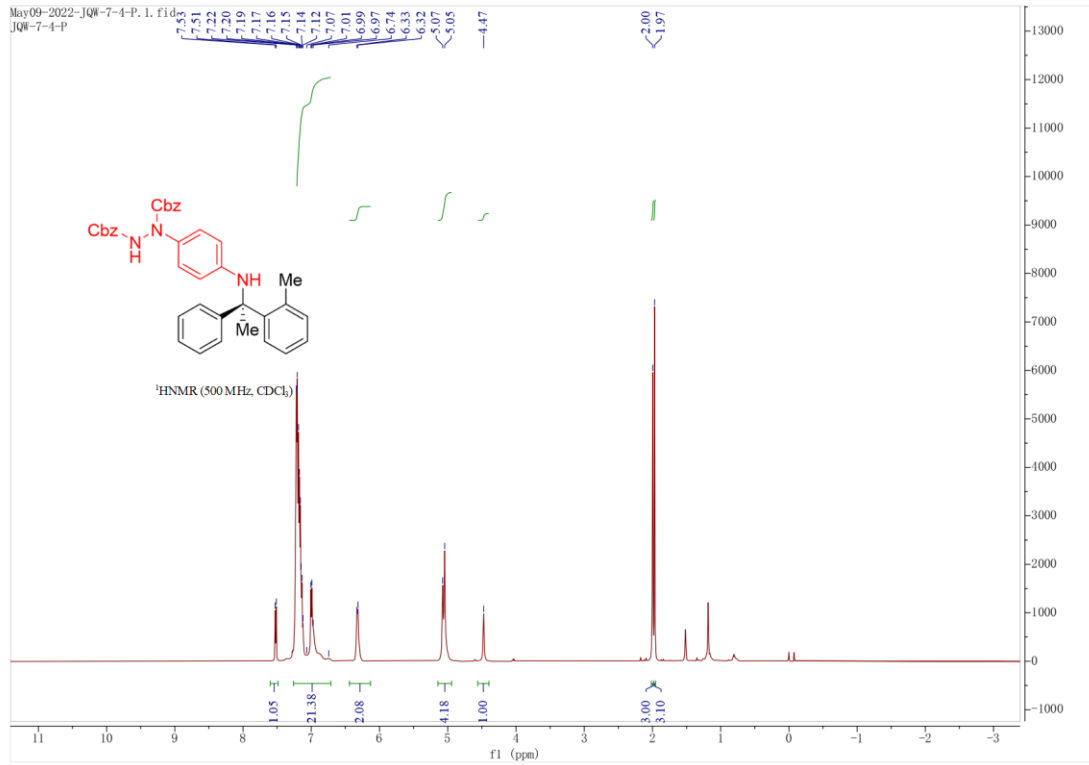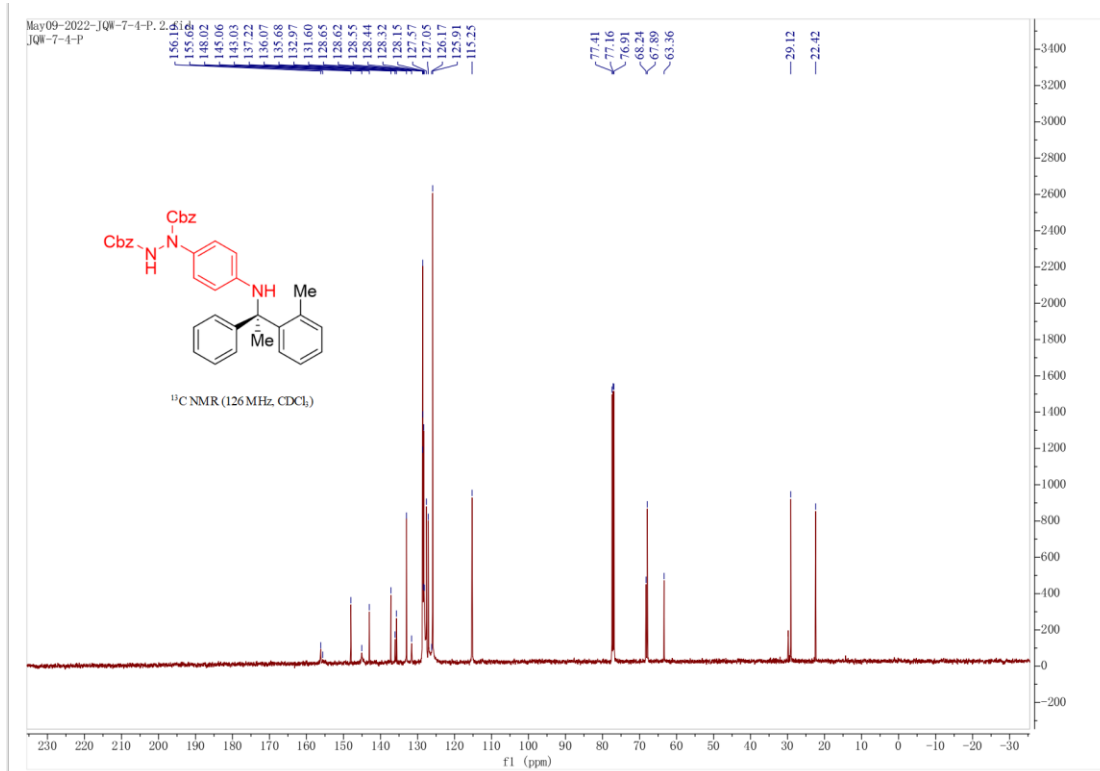

(S)-3-methyl-N-(1-phenyl-1-(o-tolyl)ethyl)aniline ((S)-**1b**)

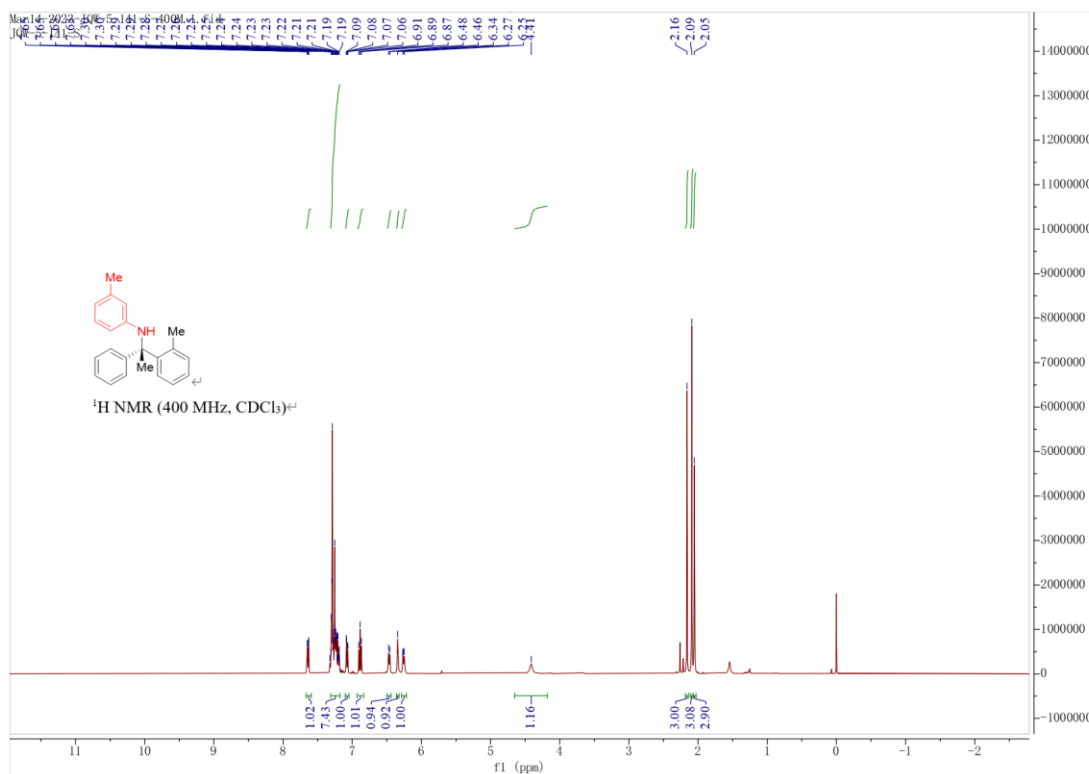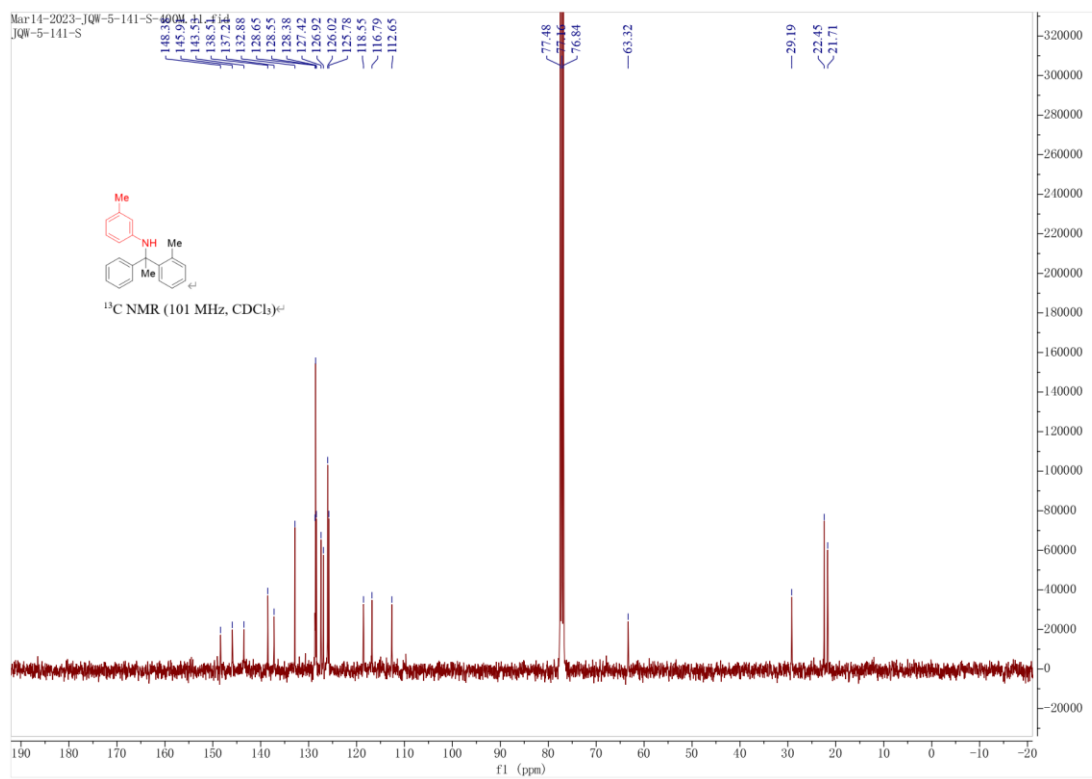

Dibenzyl(R)-1-(2-methyl-4-((1-phenyl-1-(*o*-tolyl)ethyl)amino)phenyl)hydrazine-1,2-dicarboxylate (**3b**)

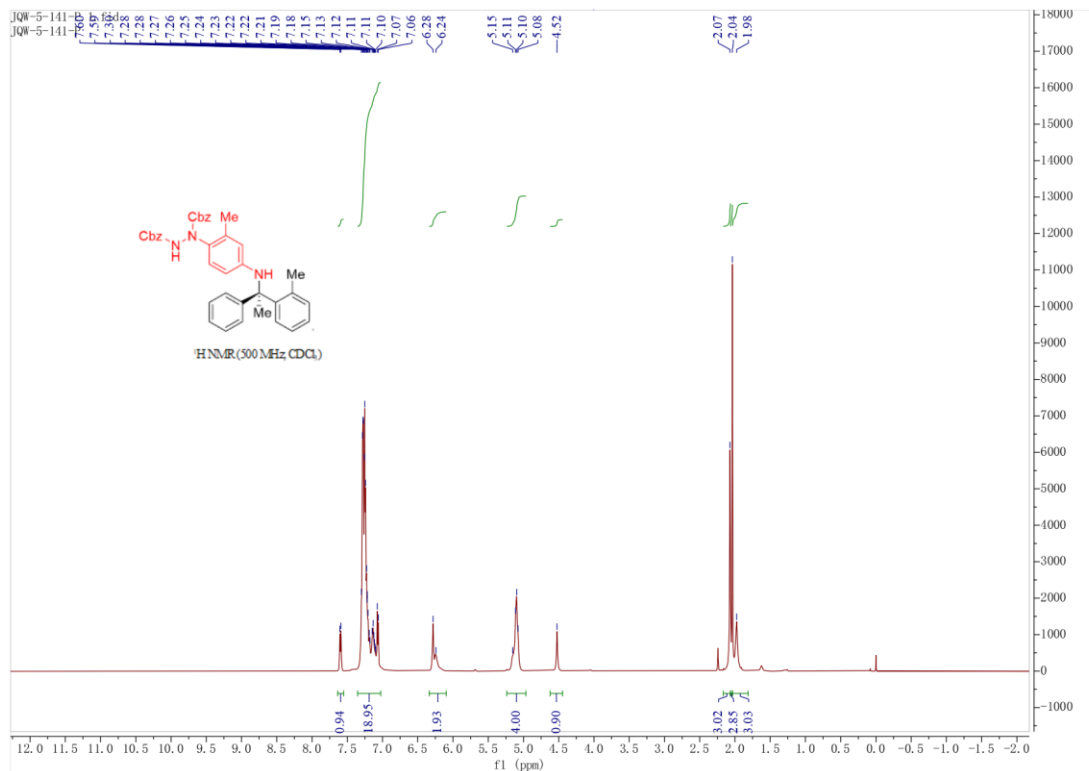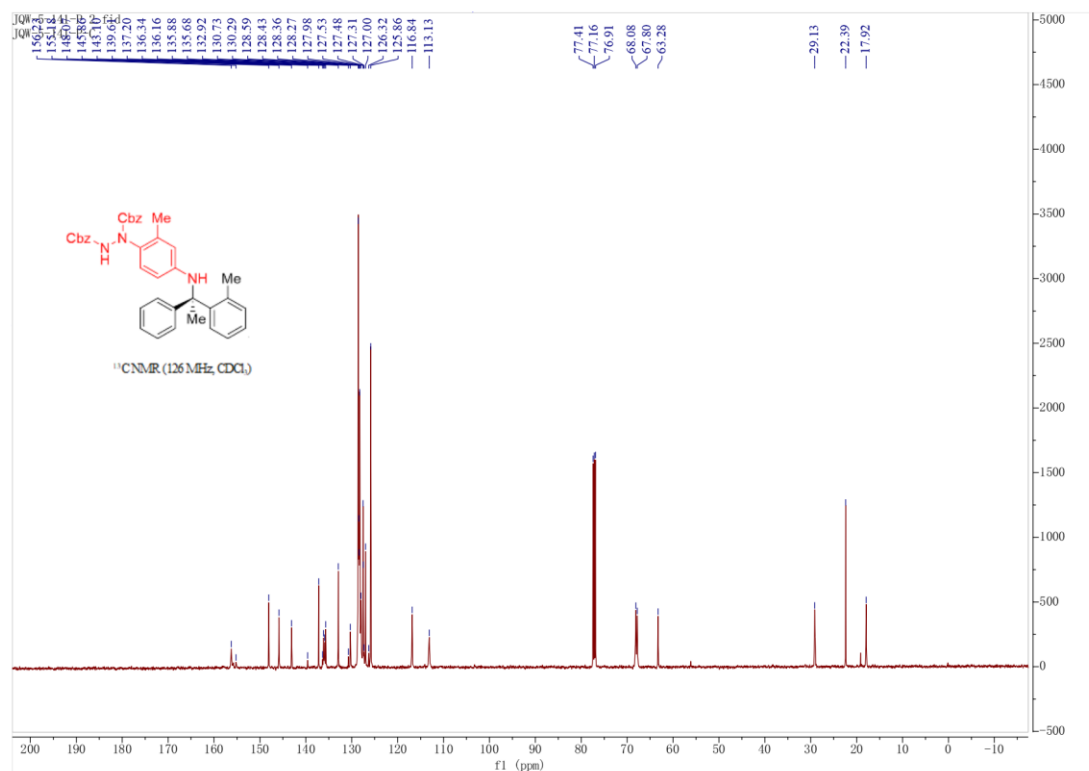

(S)-3-methoxy-N-(1-phenyl-1-(o-tolyl)ethyl)aniline ((S)-1c)

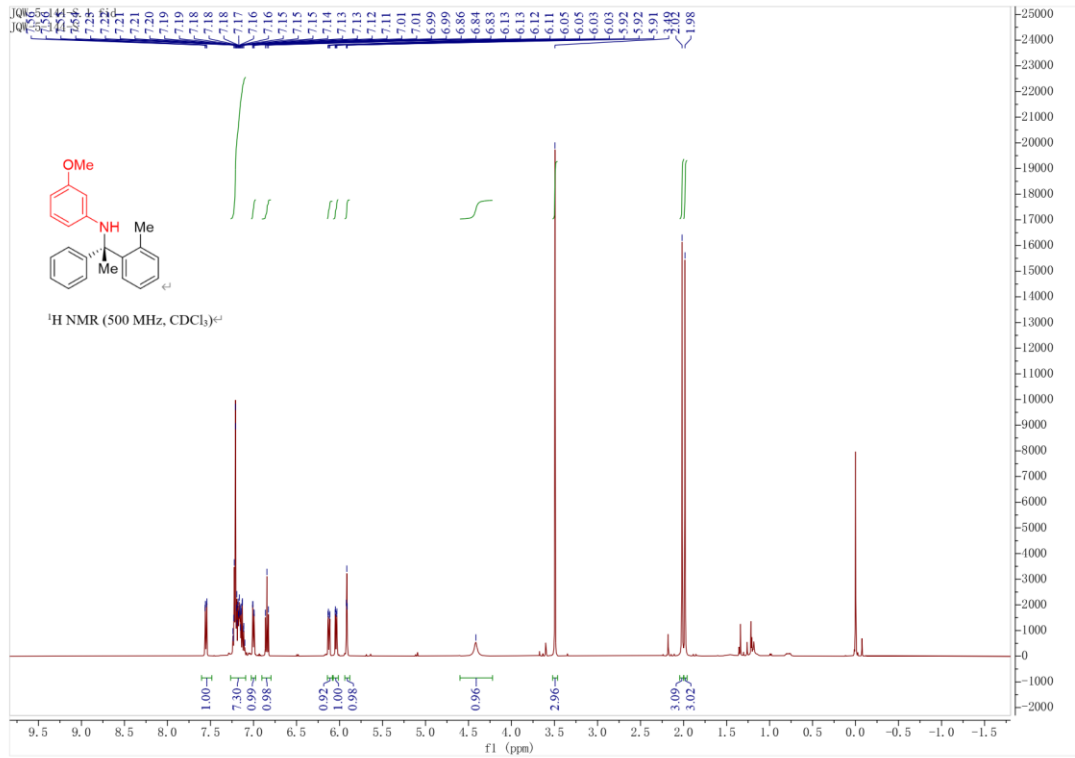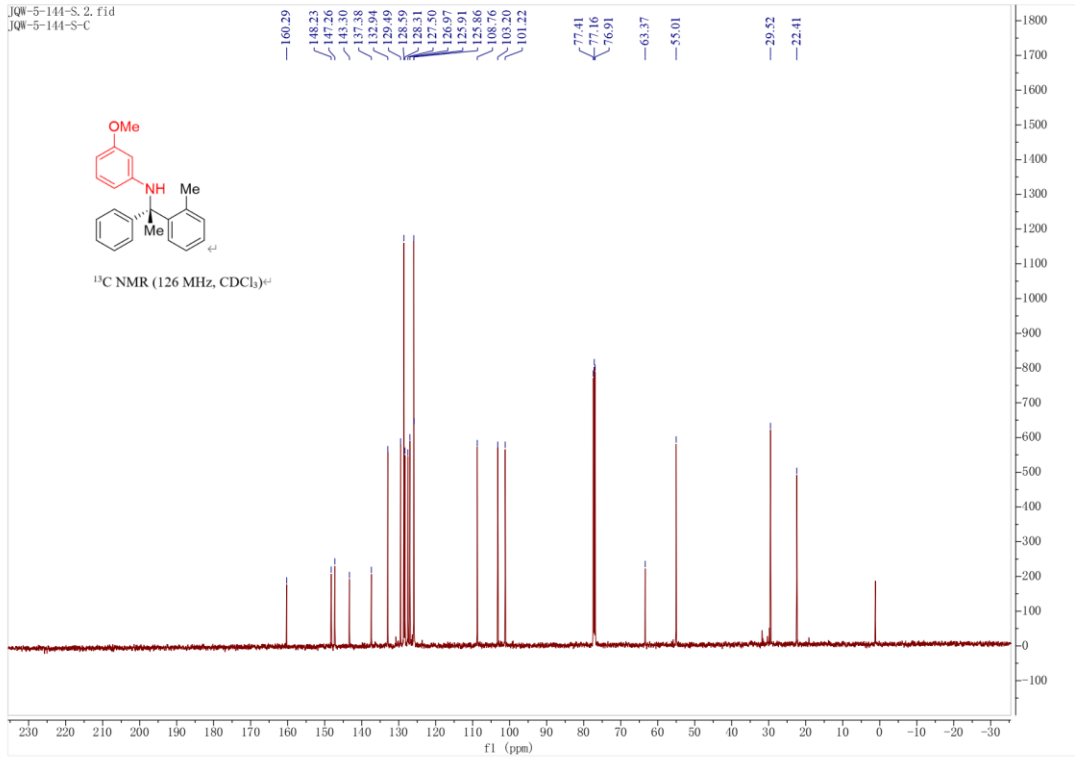

Dibenzyl-(*R*)-1-(2-methoxy-4-((1-phenyl-1-(*o*-tolyl)ethyl)amino)phenyl)hydrazine-1,2-dicarboxylate (**3c**)

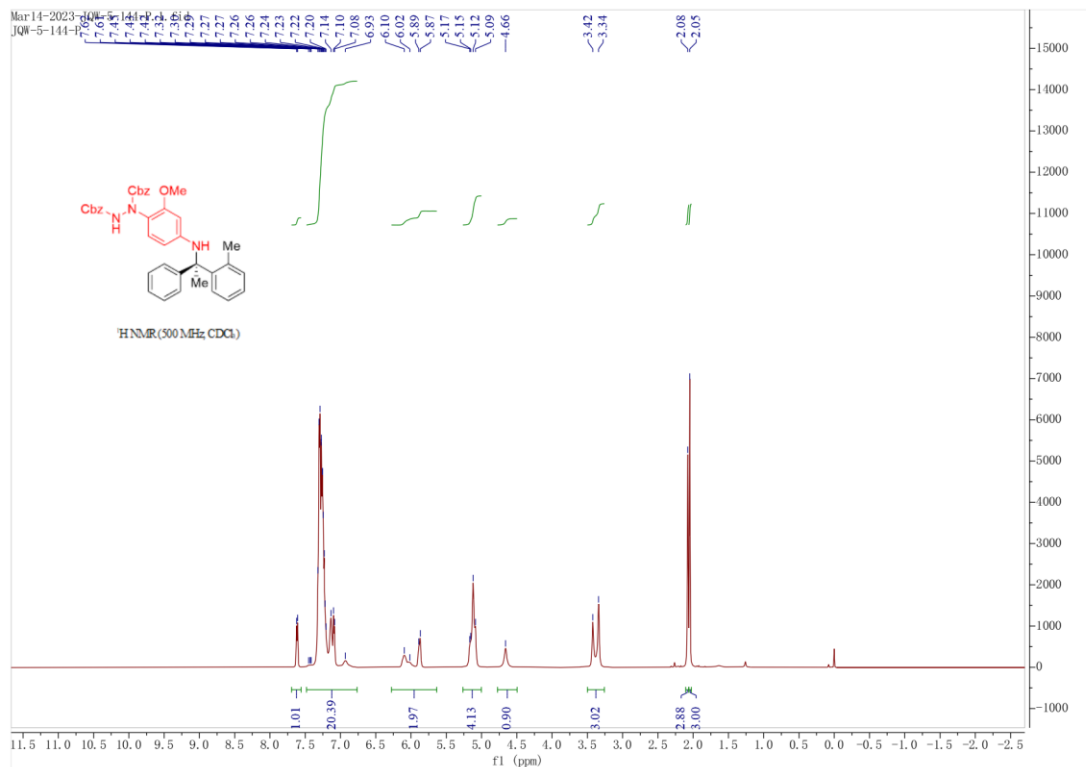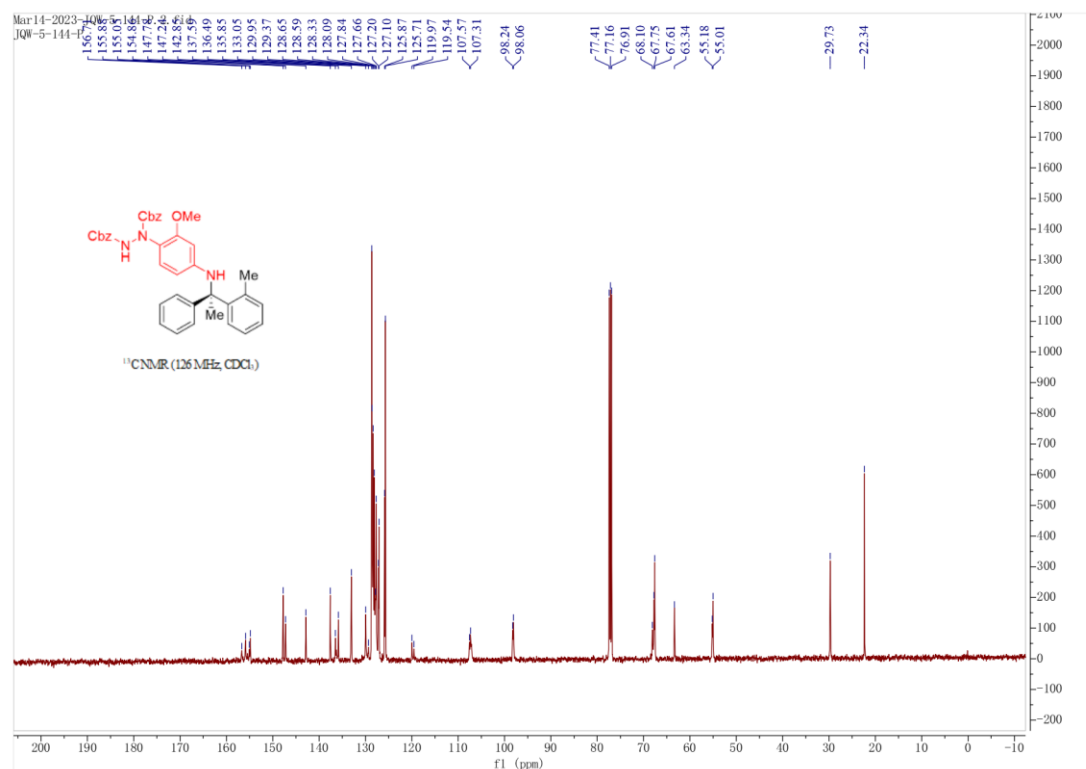



(S)-3-chloro-N-(1-phenyl-1-(o-tolyl)ethyl)aniline ((S)-**1d**)

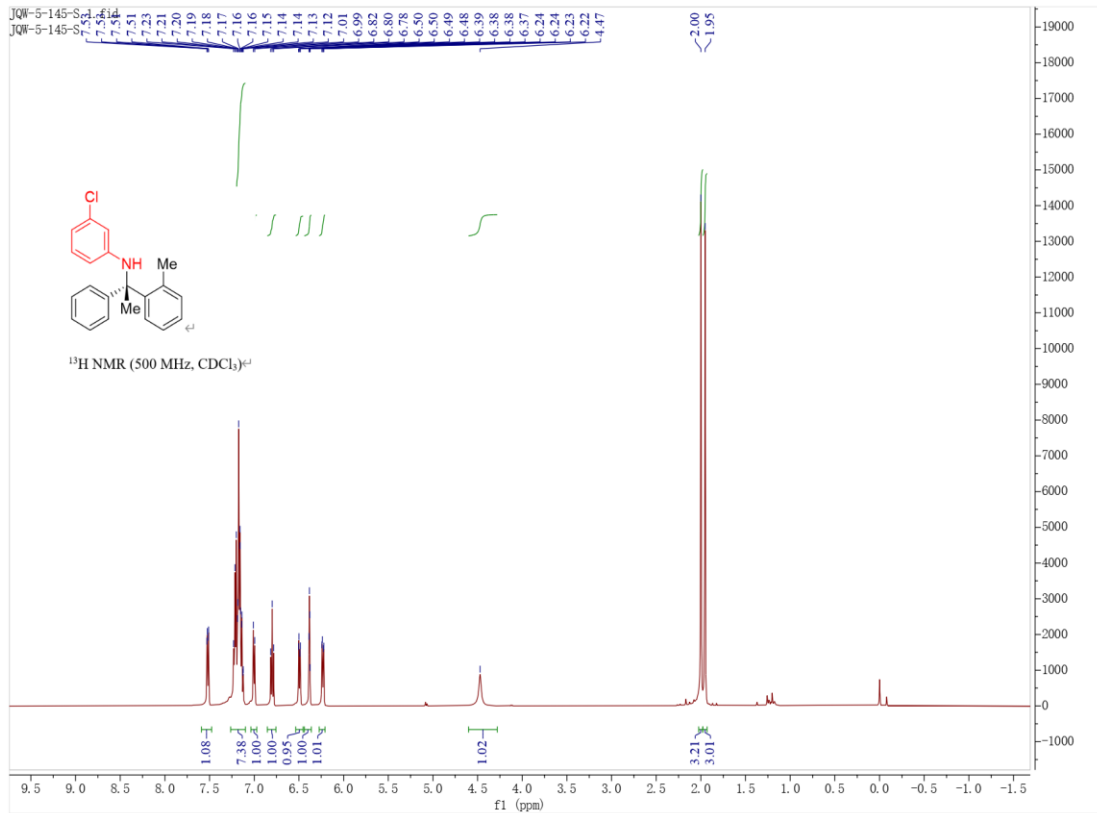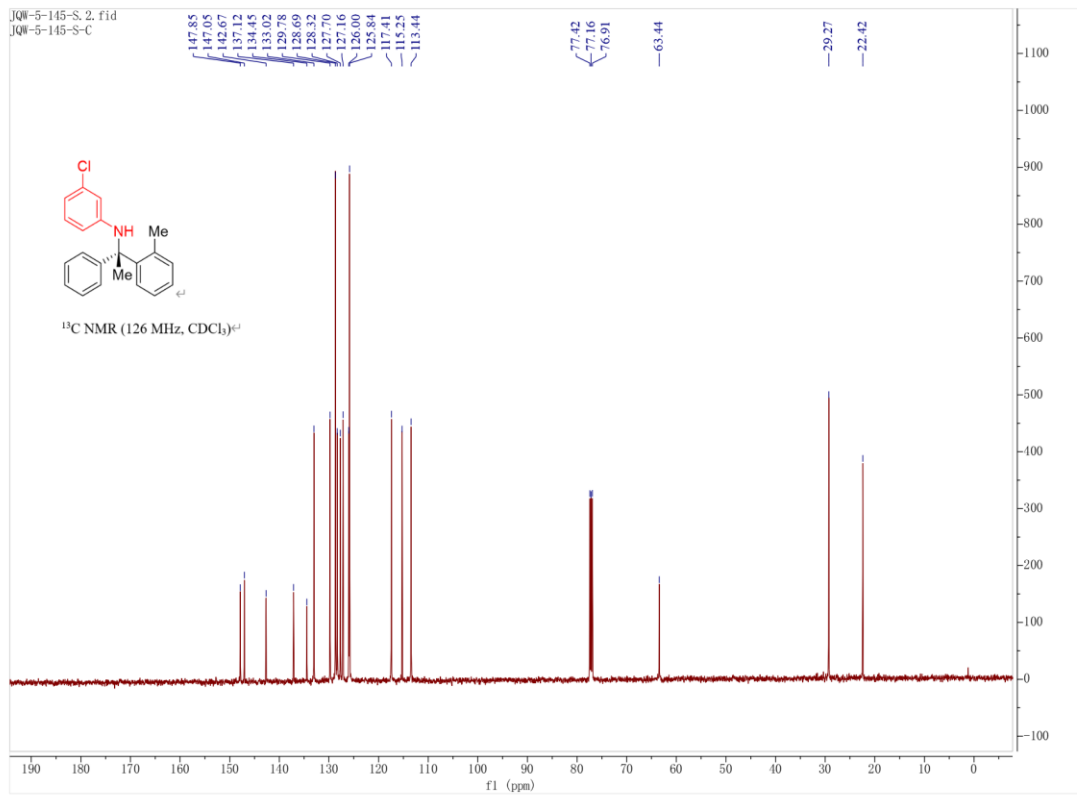

Dibenzyl-(*R*)-1-(2-chloro-4-((1-phenyl-1-(*o*-tolyl)ethyl)amino)phenyl)hydrazine-1,2-dicarboxylate (**3d**)

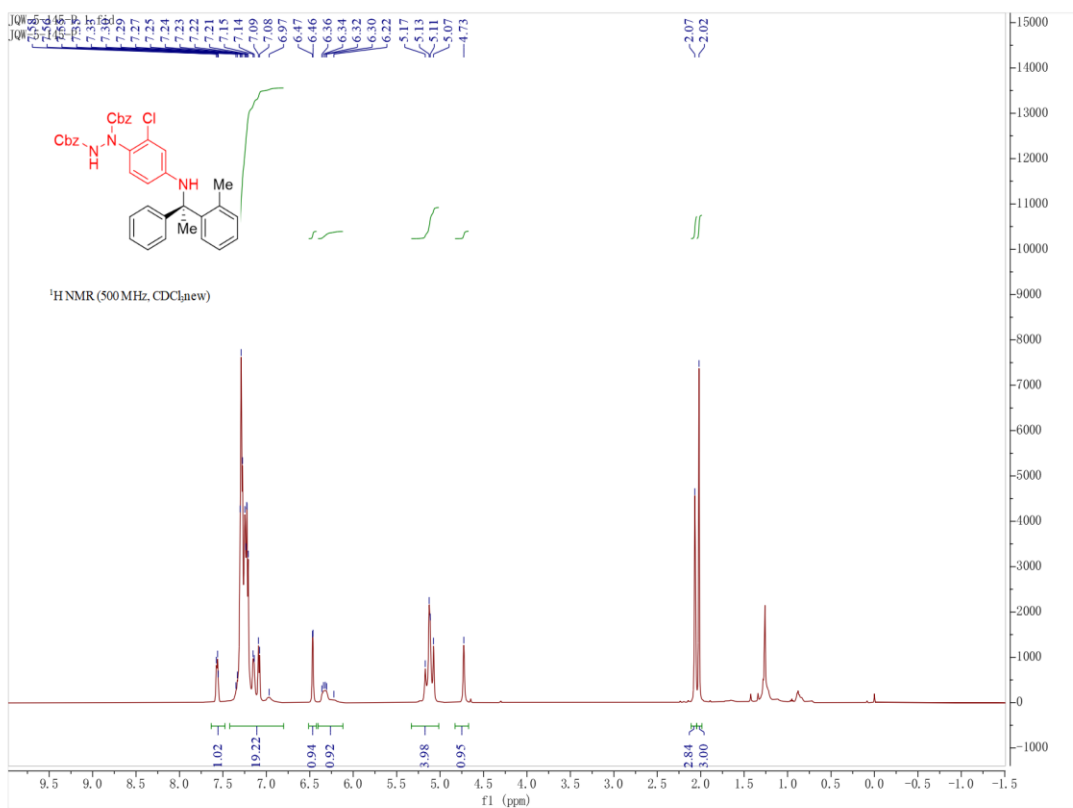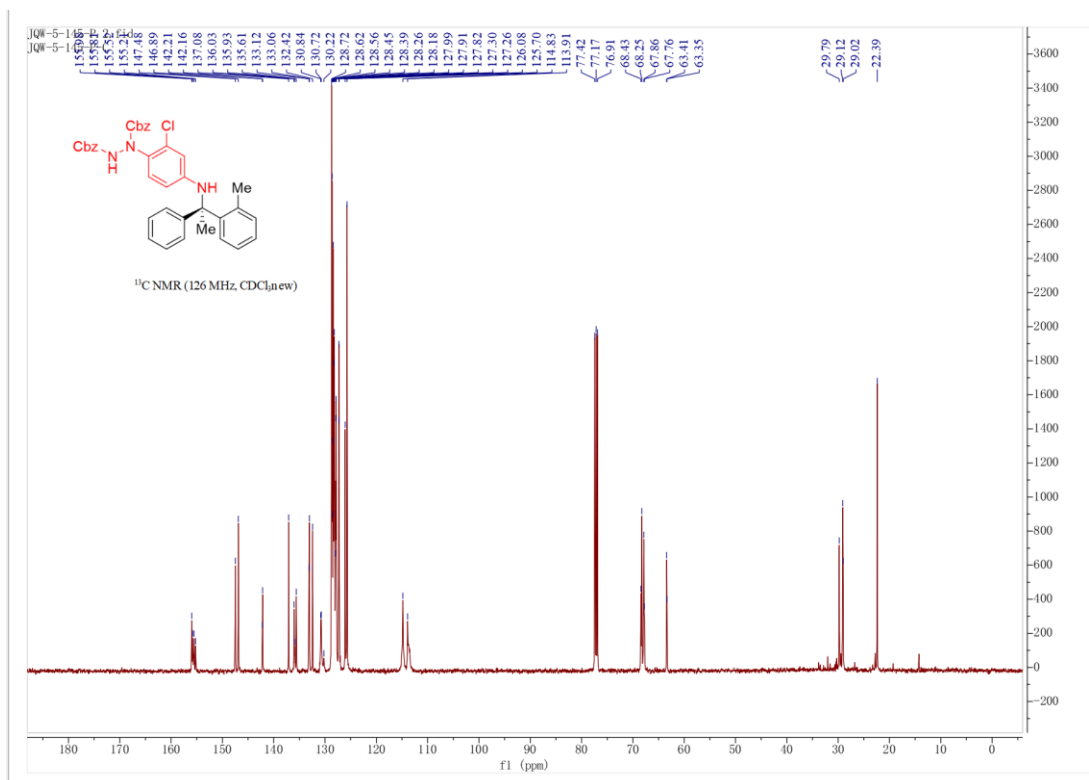

(S)-3-fluoro-N-(1-phenyl-1-(o-tolyl)ethyl)aniline ((S)-1e)

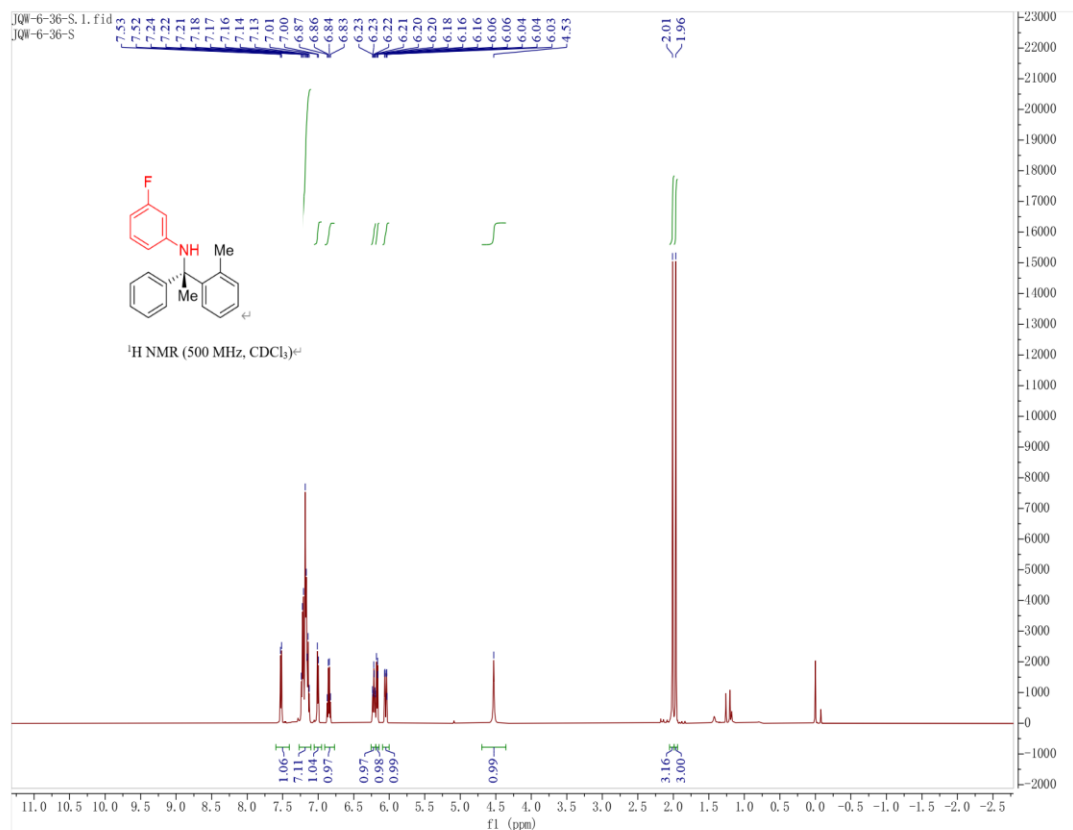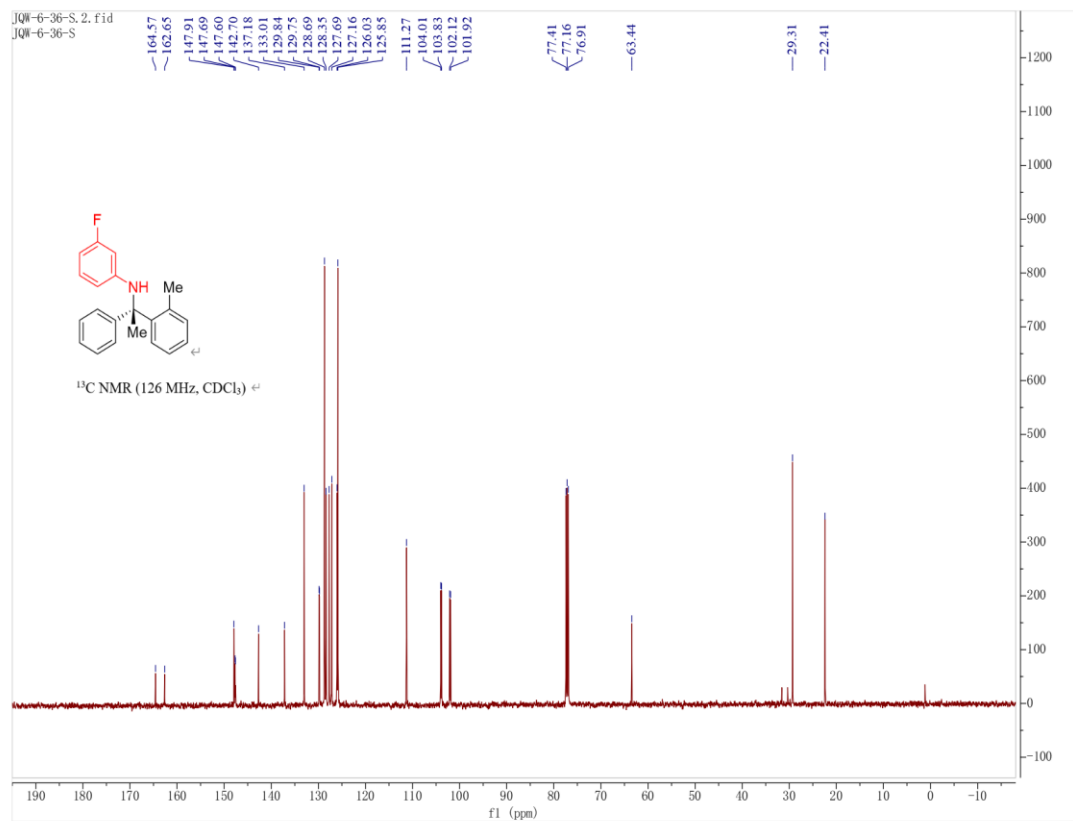

JQW-6-36-S, 3, fid  
JQW-6-36-S

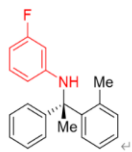

<sup>19</sup>F NMR (471 MHz, CDCl<sub>3</sub>)

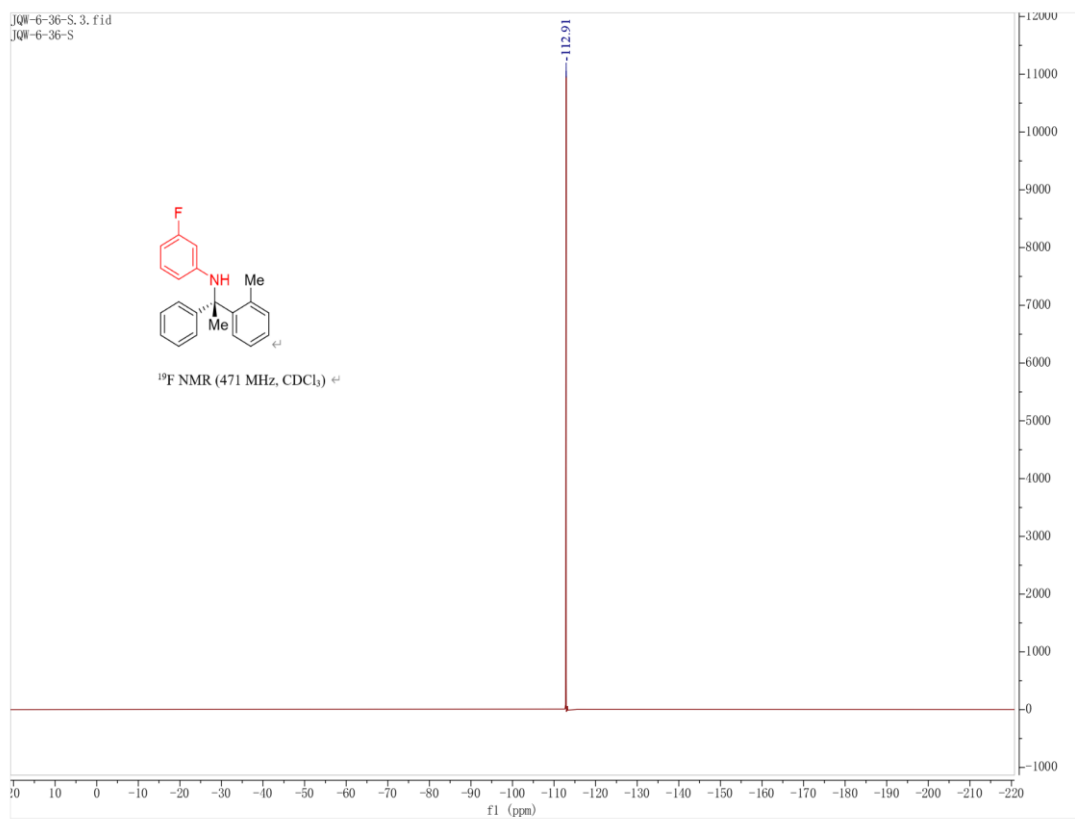

Dibenzyl-(*R*)-1-(2-fluoro-4-((1-phenyl-1-(*o*-tolyl)ethyl)amino)phenyl)hydrazine-1,2-dicarboxylate (**3e**)

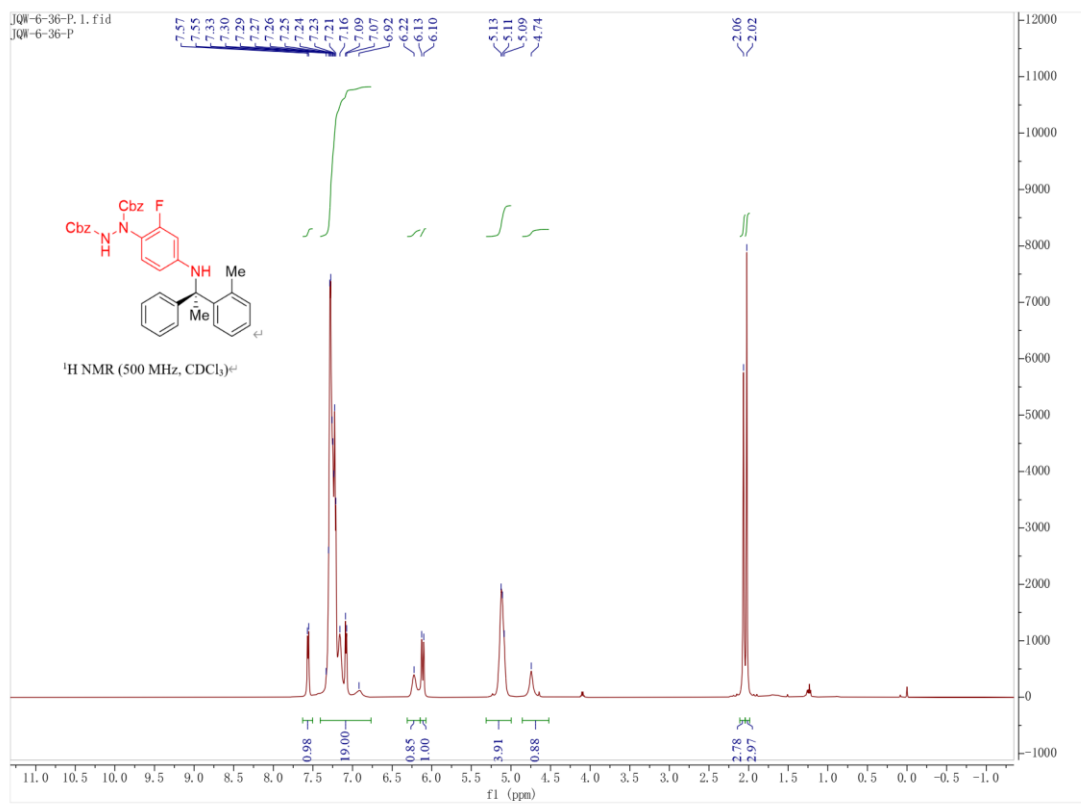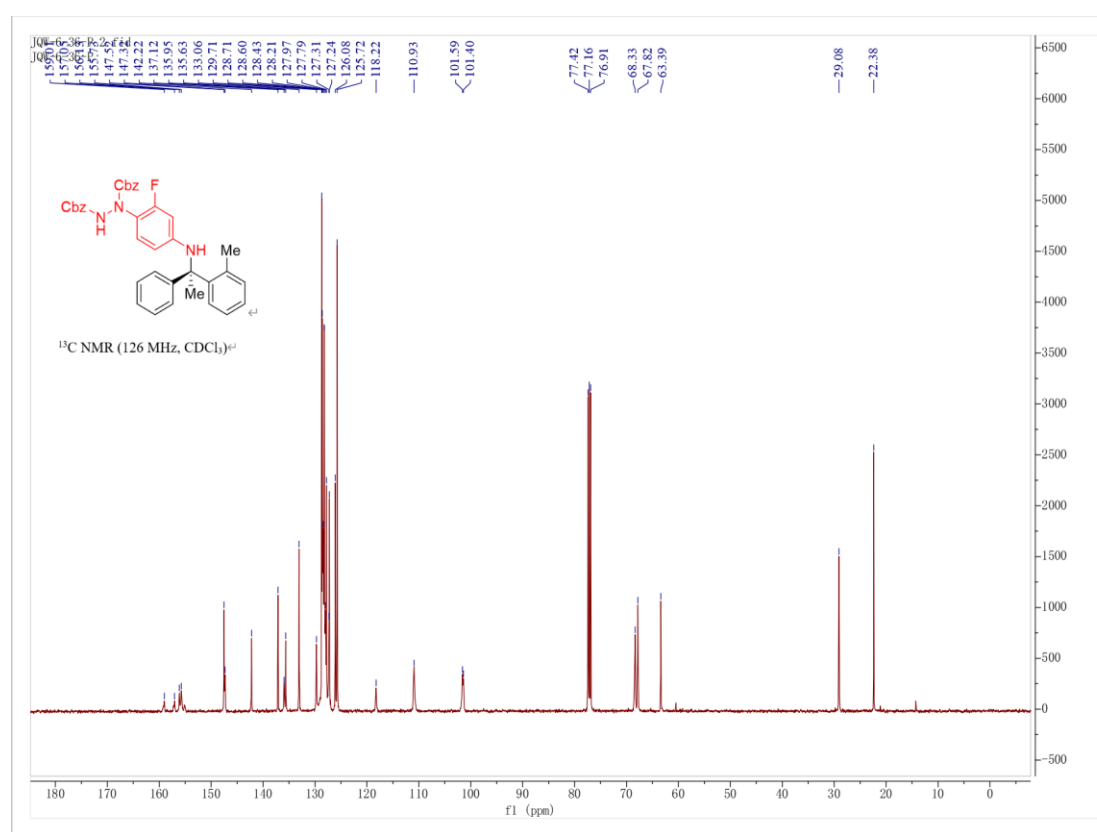

JQW-6-36-P.3.fid  
JQW-6-36-P

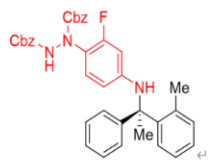

<sup>19</sup>F NMR (471 MHz, CDCl<sub>3</sub>)<sup>d</sup>

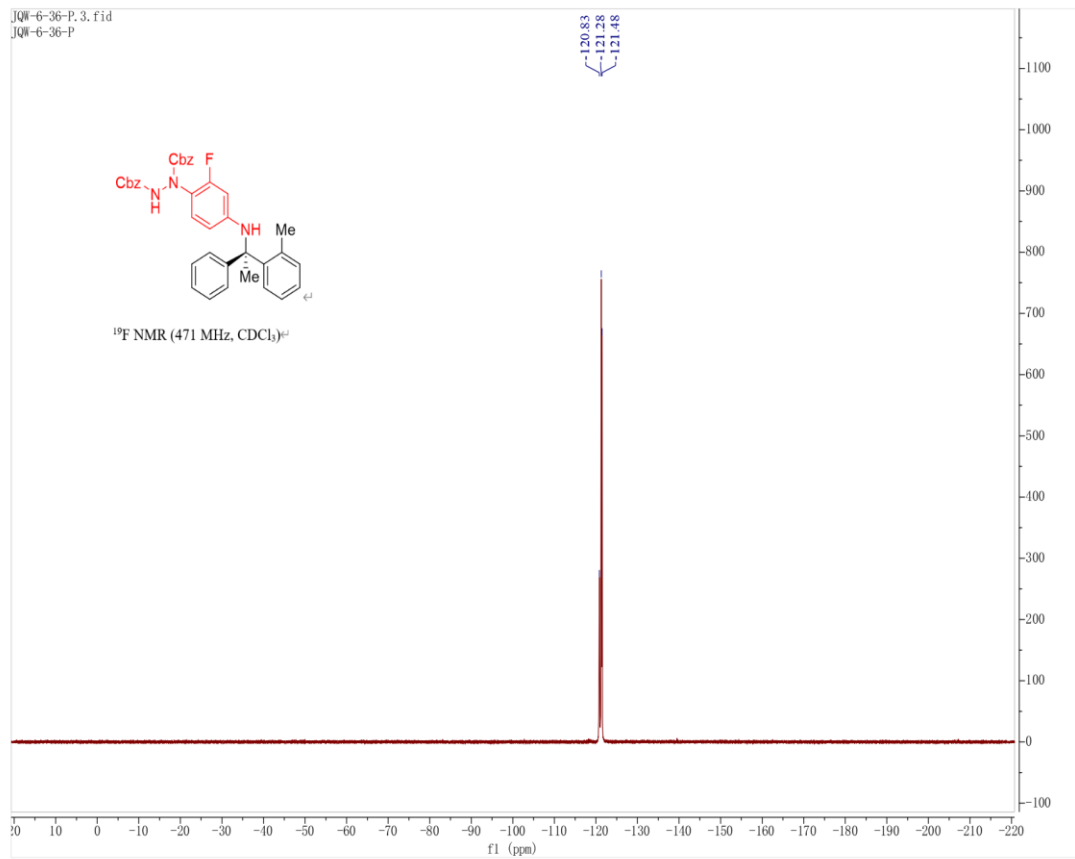

(S)-3,5-dimethyl-N-(1-phenyl-1-(o-tolyl)ethyl)aniline ((S)-**1f**)

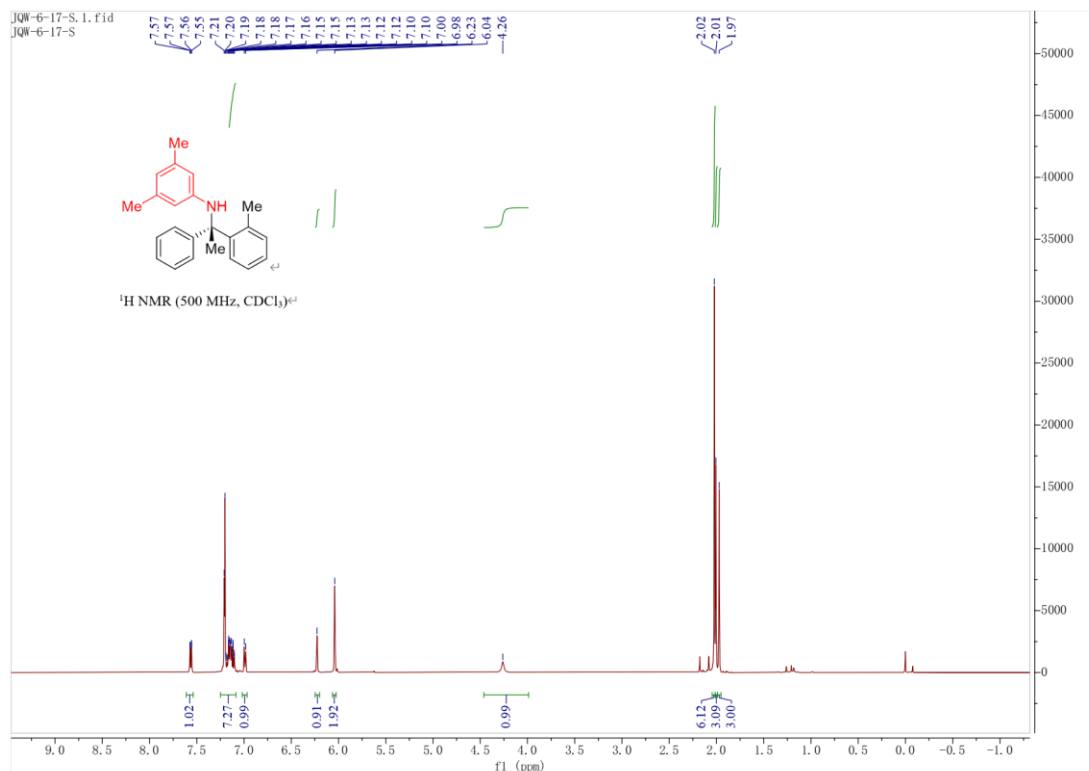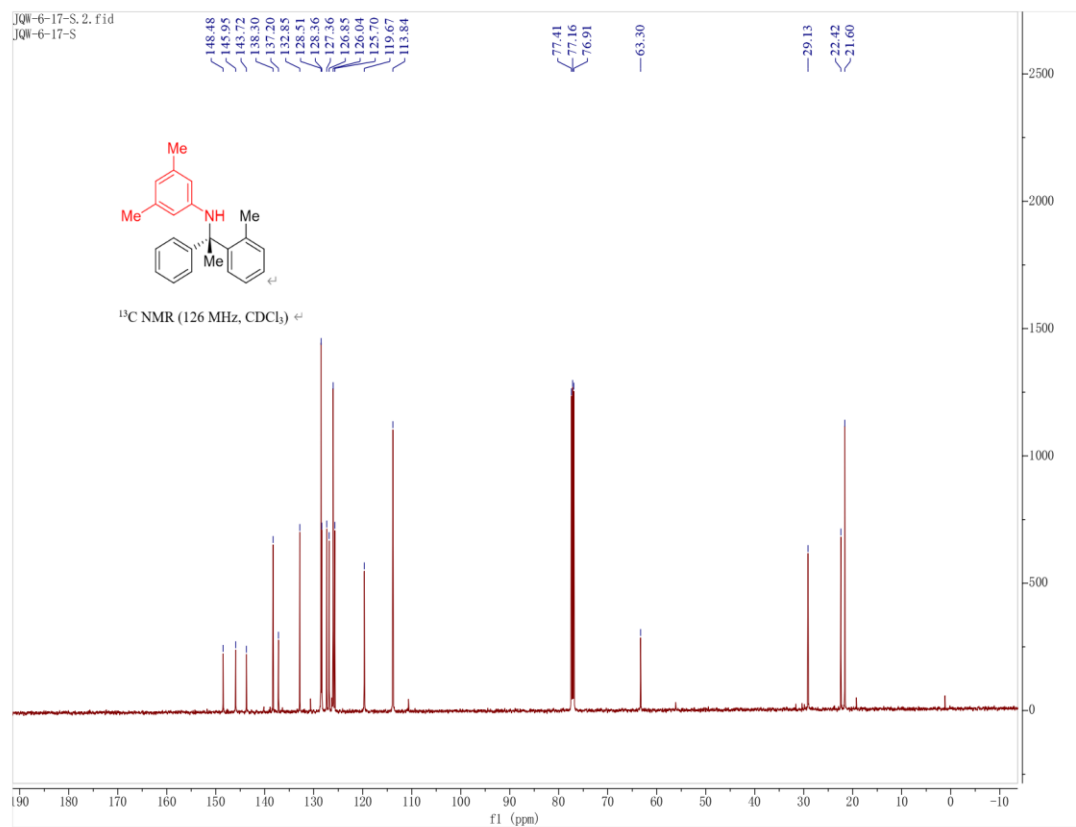

Dibenzyl-(*R*)-1-(2,6-dimethyl-4-((1-phenyl-1-(*o*-tolyl)ethyl)amino)phenyl)hydrazine-1,2-dicarboxylate (**3f**)

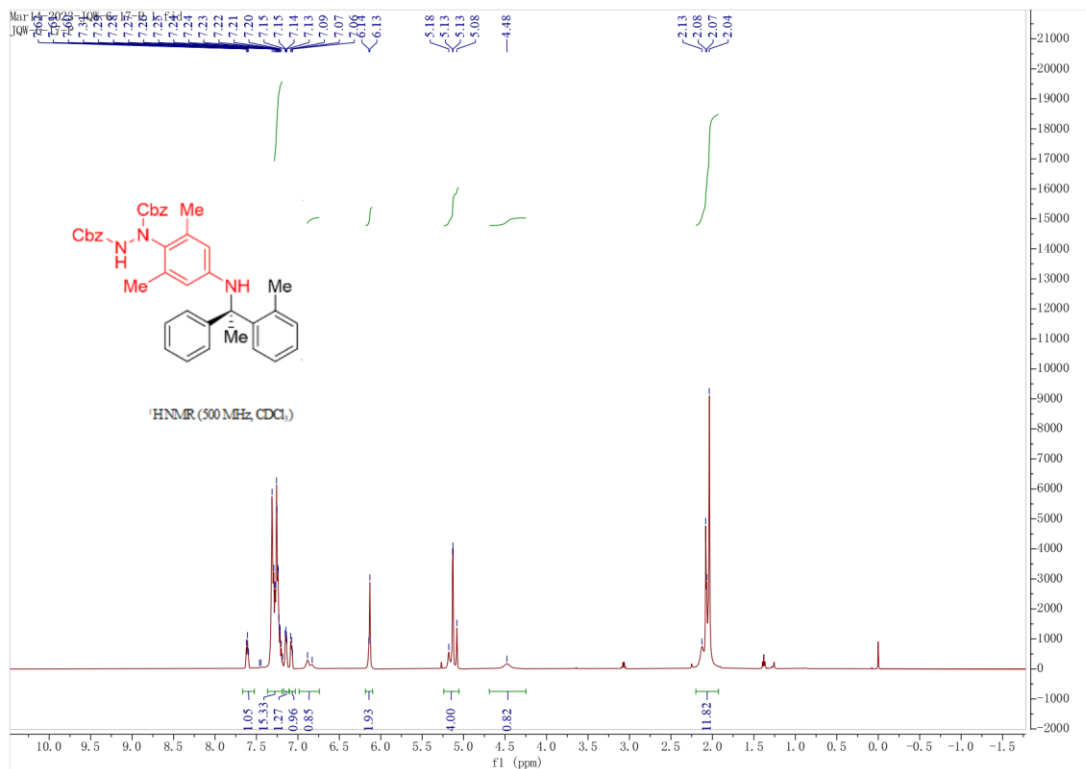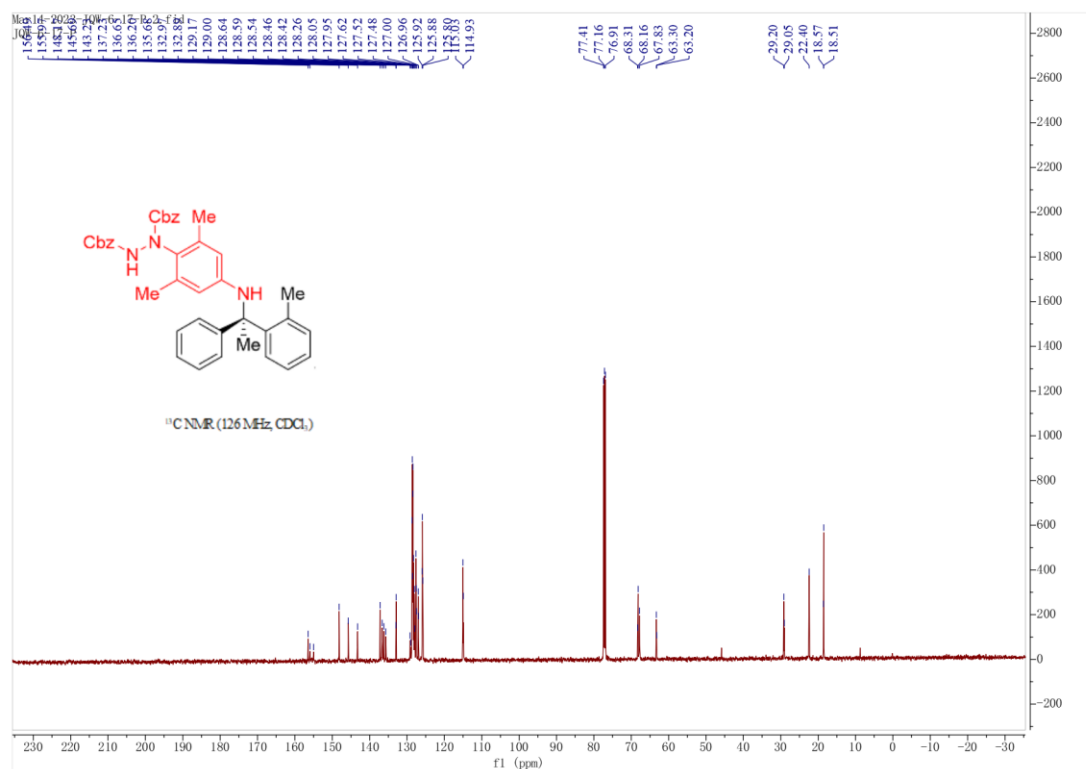



(S)-N-(1-(o-tolyl)-1-(p-tolyl)ethyl)aniline ((S)-**1g**)

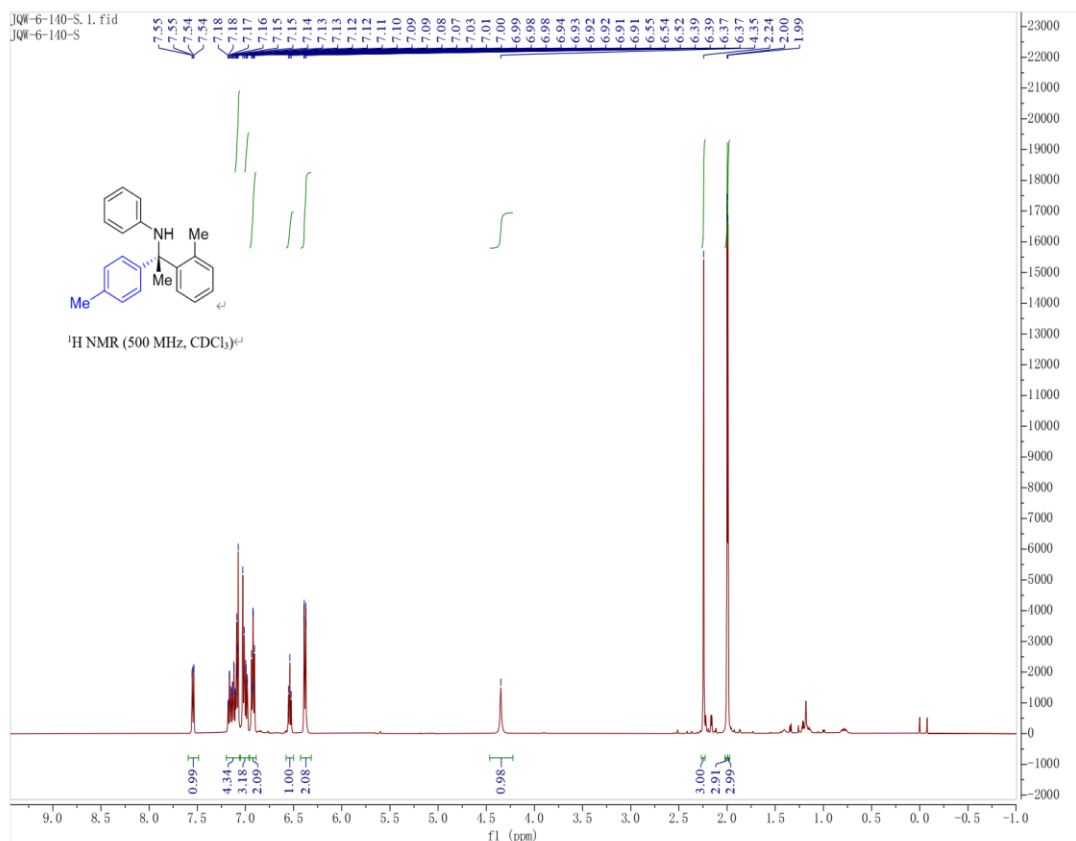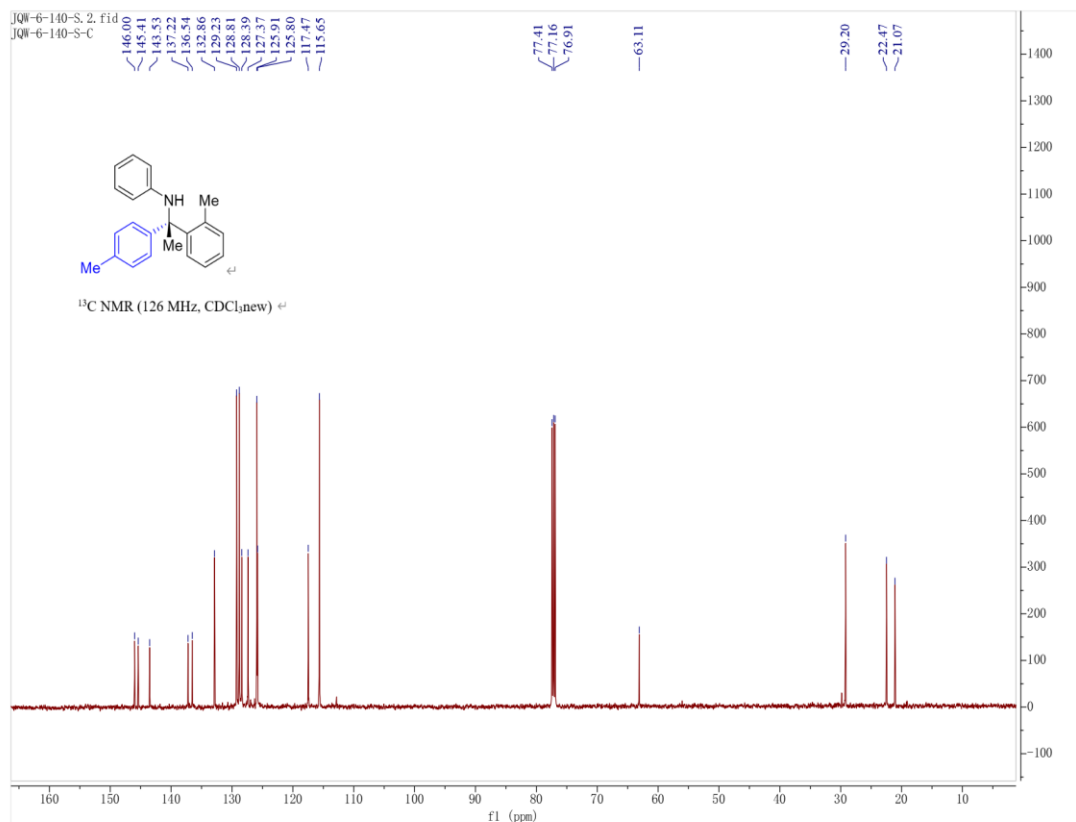

Dibenzyl (R)-1-(4-((1-(*o*-tolyl)-1-(*p*-tolyl)ethyl)amino)phenyl)hydrazine-1,2-dicarboxylate

(3g)

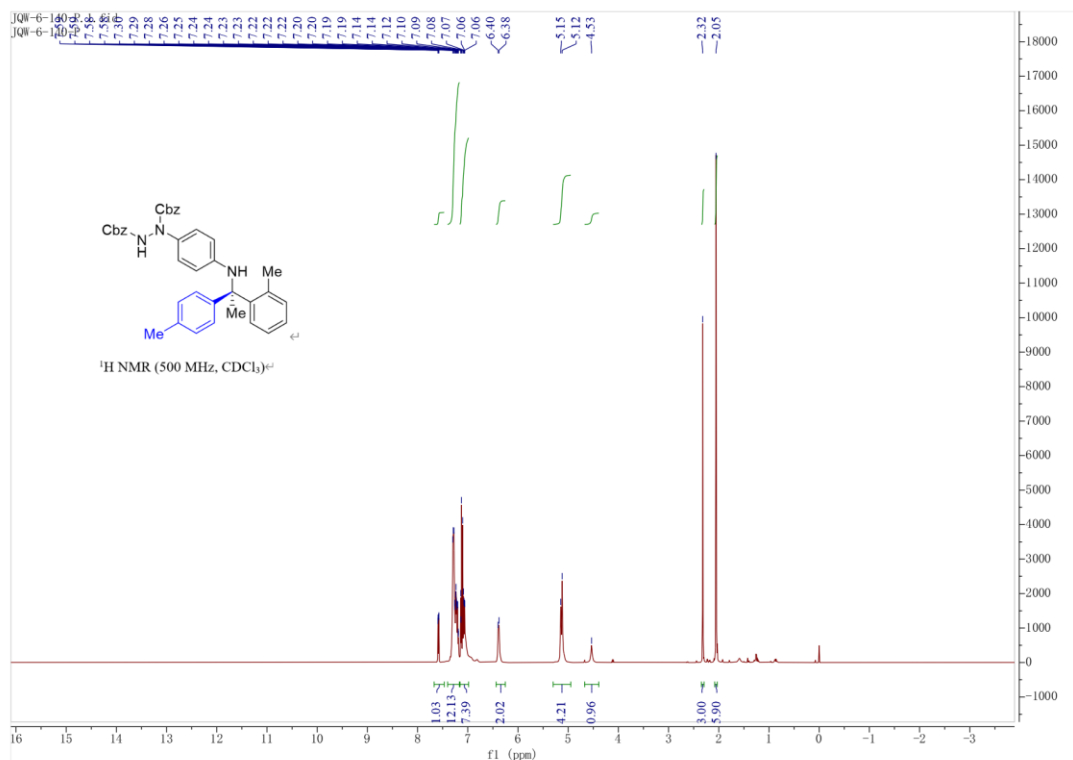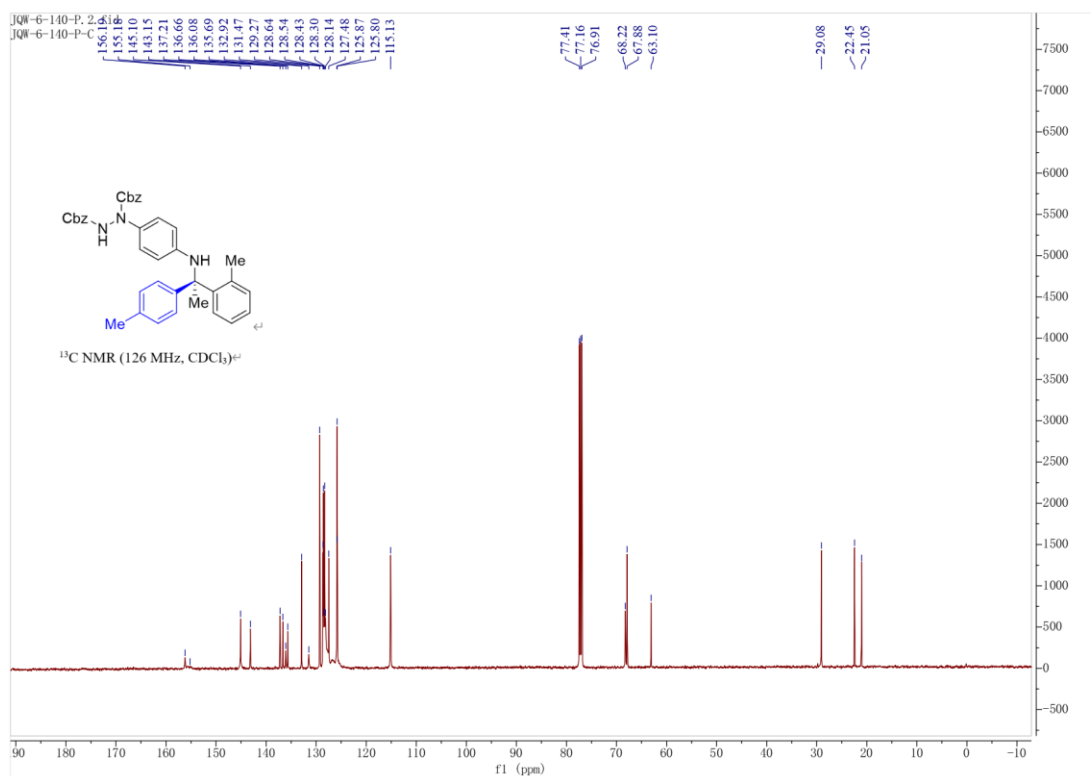

(S)-N-(1-(4-chlorophenyl)-1-(o-tolyl)ethyl)aniline ((S)-**1h**)

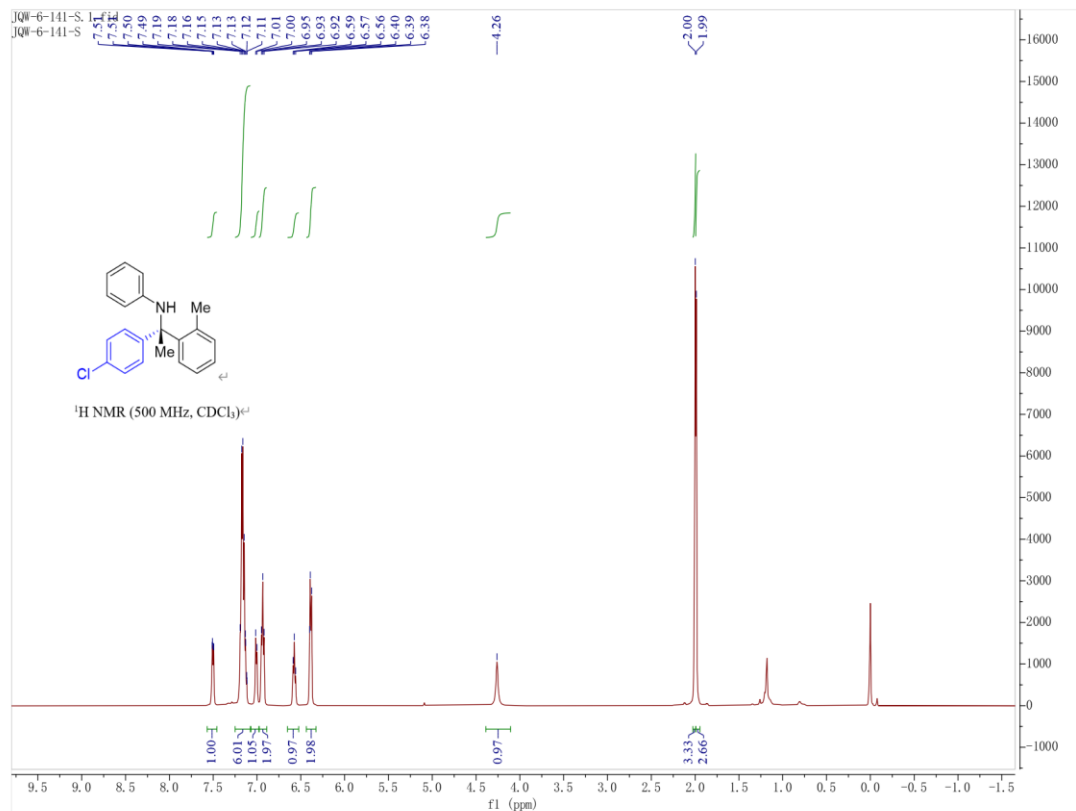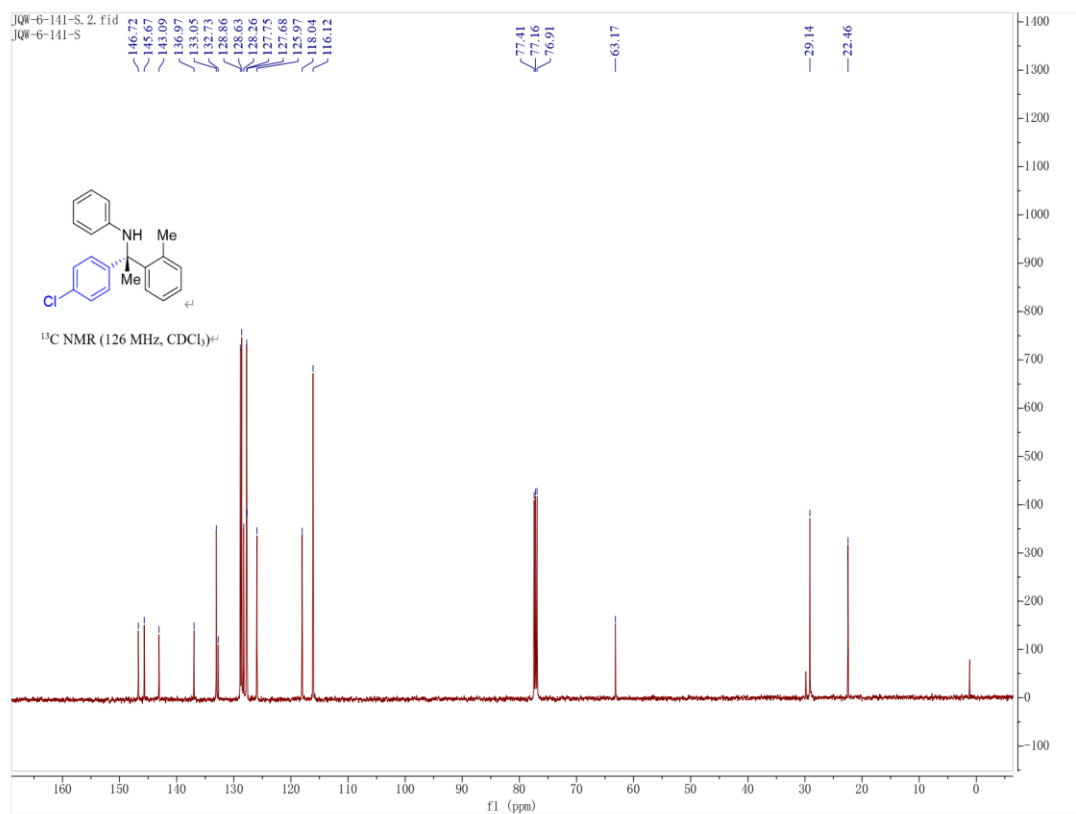

Dibenzyl-(*R*)-1-(4-((1-(4-chlorophenyl)-1-(*o*-tolyl)ethyl)amino)phenyl)hydrazine-1,2-dicarboxylate (**3h**)

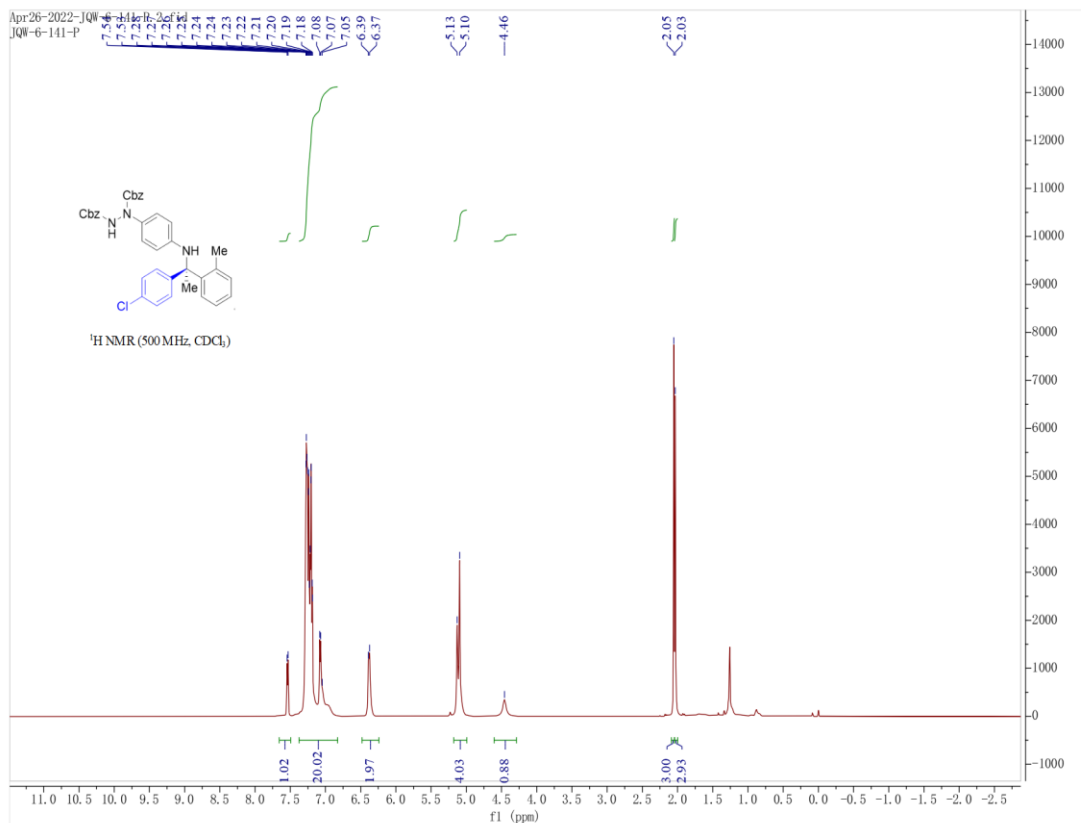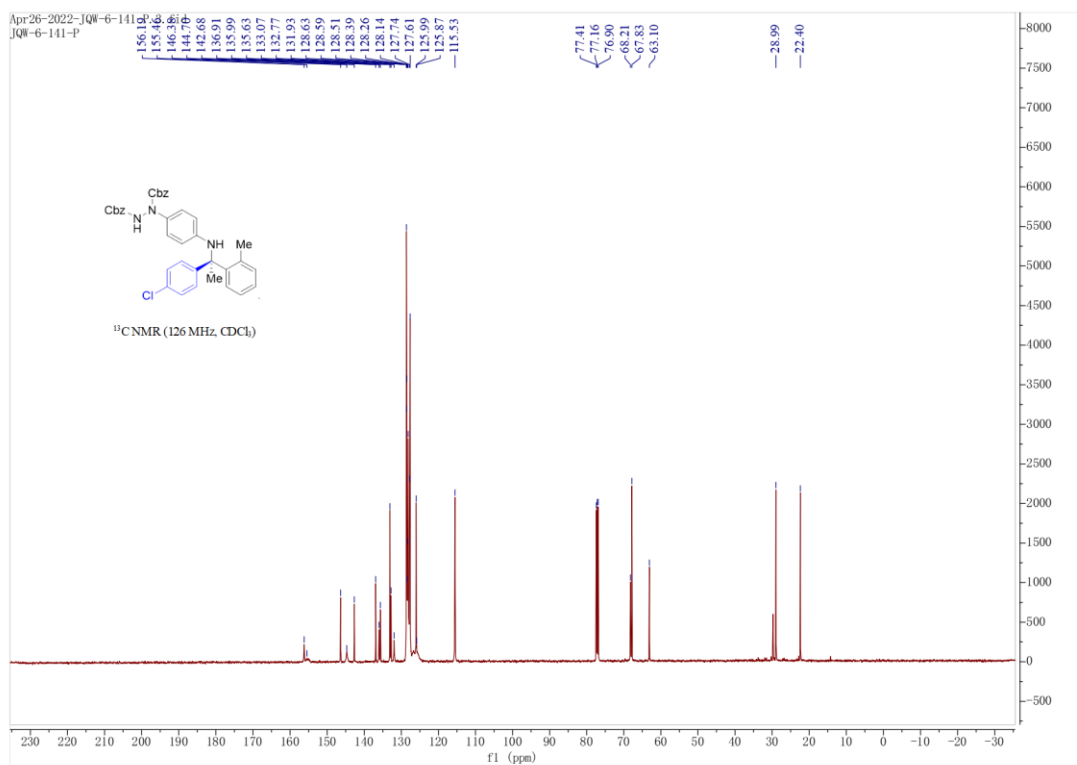

(S)-N-(1-(4-methoxyphenyl)-1-(o-tolyl)ethyl)aniline ((S)-**1i**)

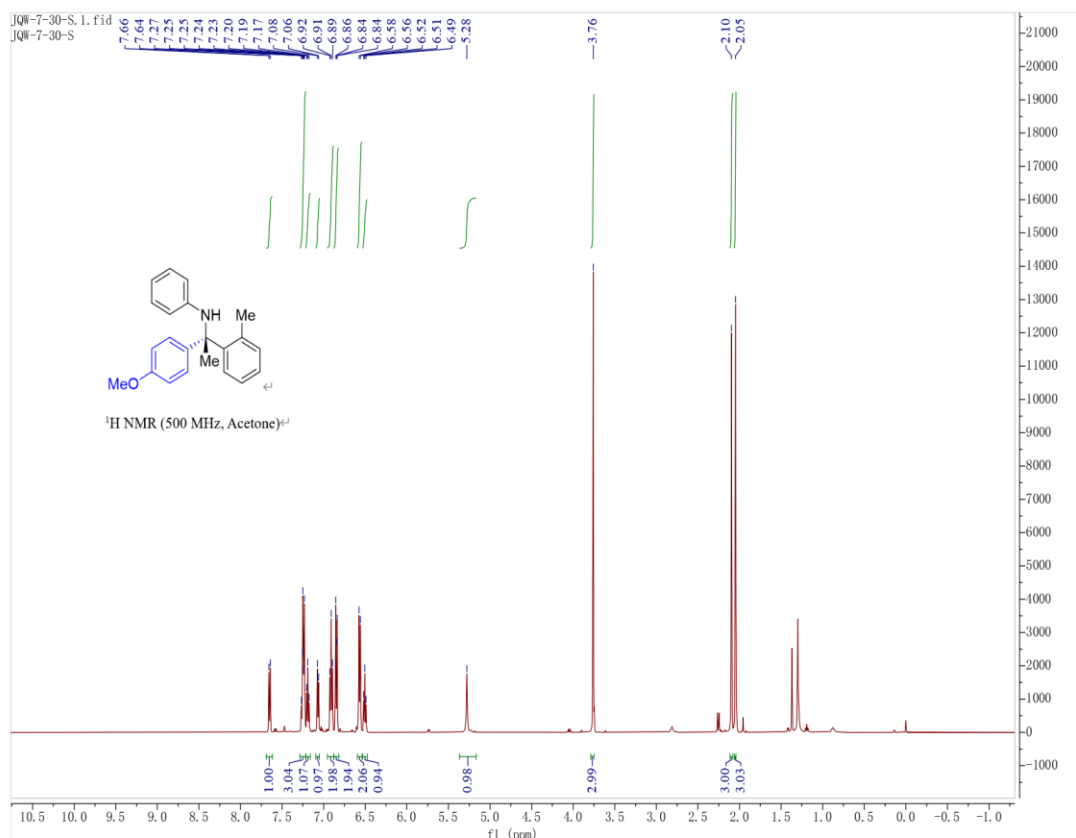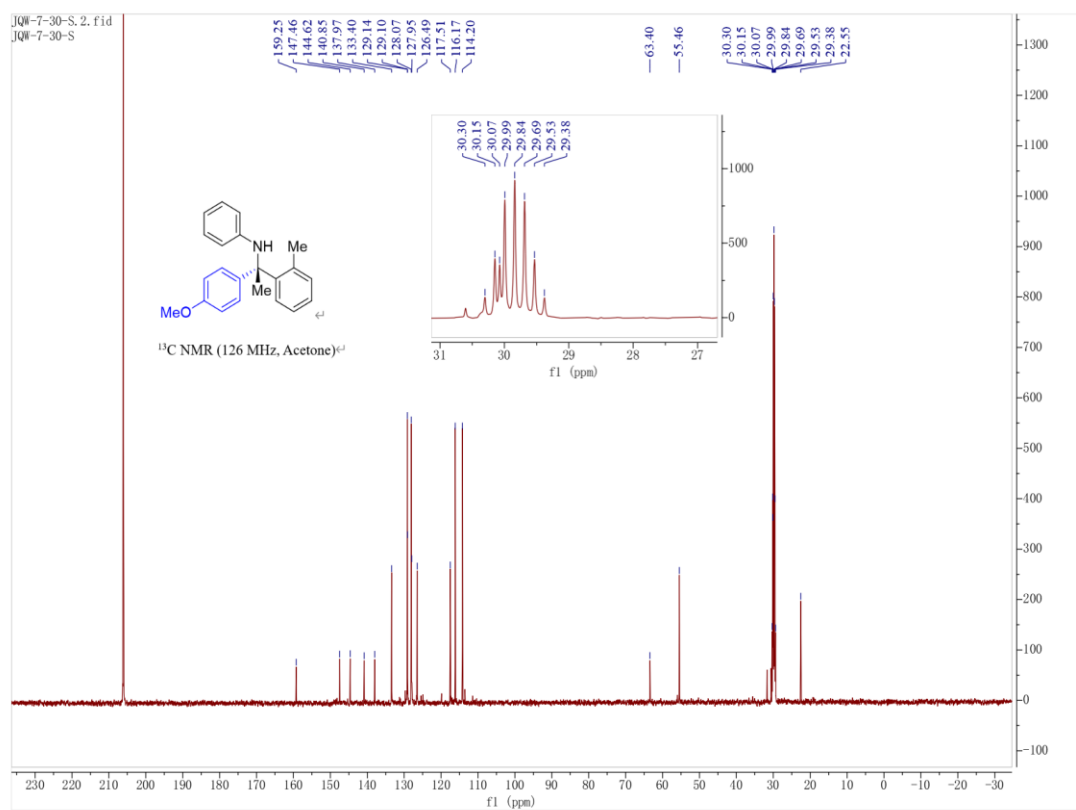

Dibenzyl-(*R*)-1-(4-((1-(4-methoxyphenyl)-1-(*o*-tolyl)ethyl)amino)phenyl)hydrazine-1,2-dicarboxylate (**3i**)

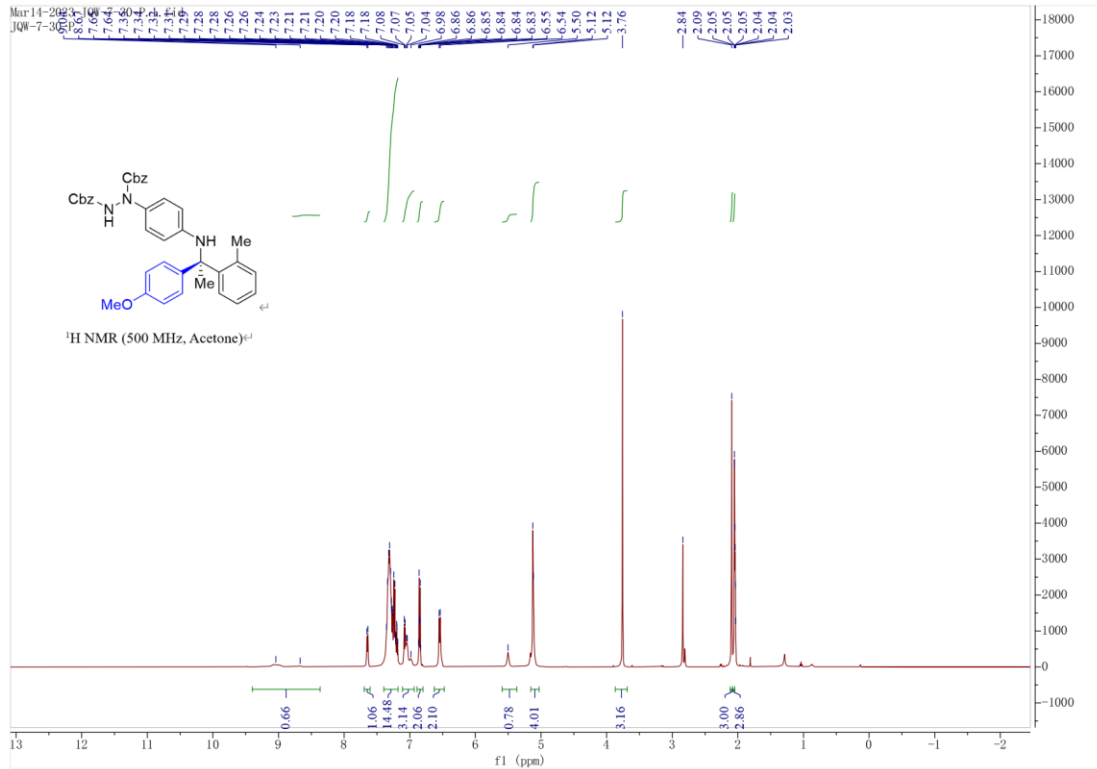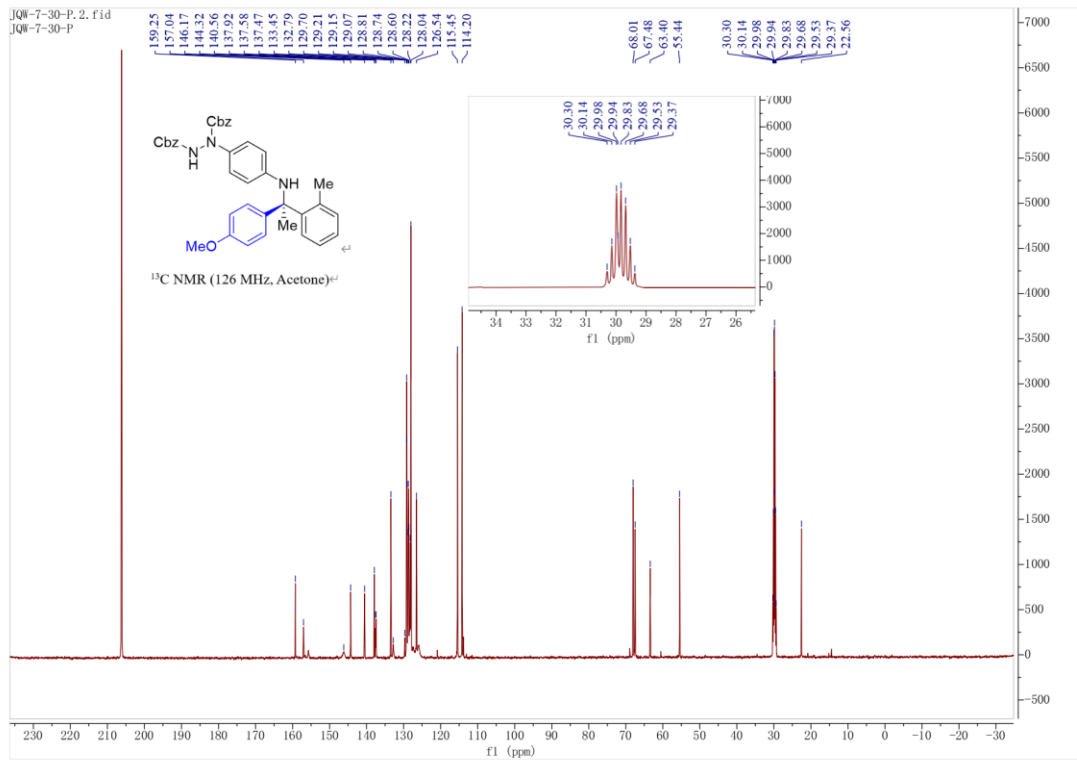

*(S)*-*N*-(1-([1,1'-biphenyl]-4-yl)-1-(*o*-tolyl)ethyl)aniline (**(S)-1j**)

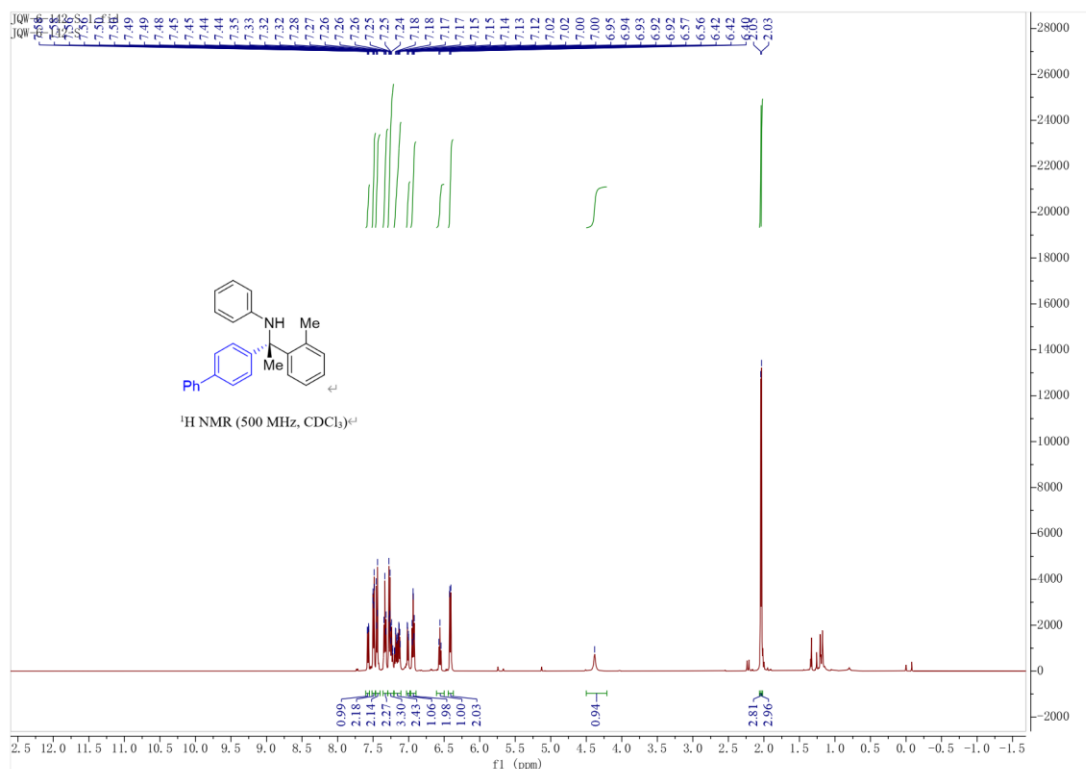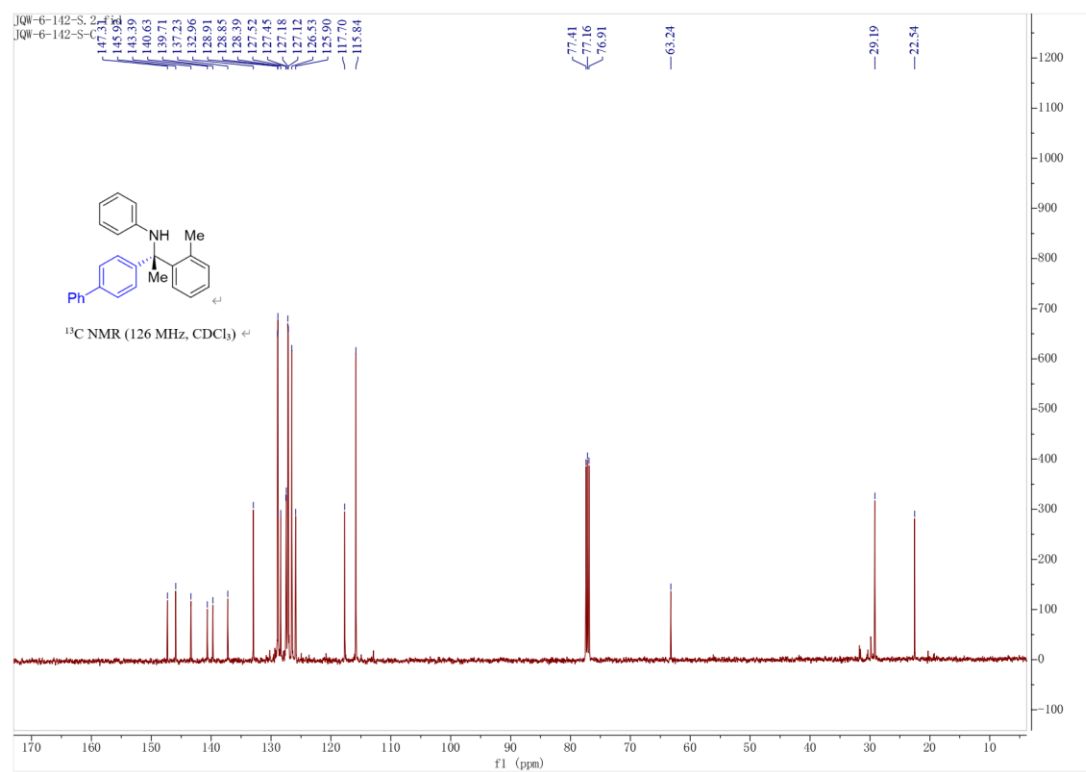

Dibenzyl-(*R*)-1-(4-((1-([1,1'-biphenyl]-4-yl)-1-(*o*-tolyl)ethyl)amino)phenyl)hydrazine-1,2-dicarboxylate (**3j**)

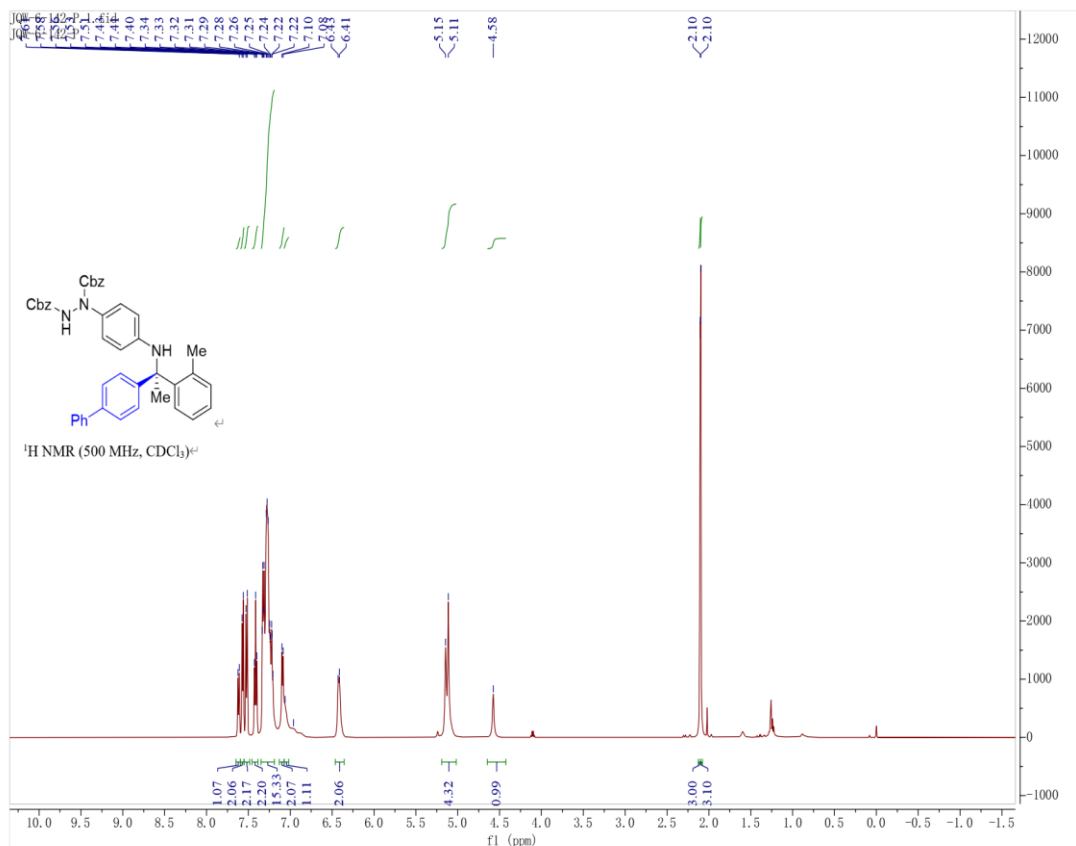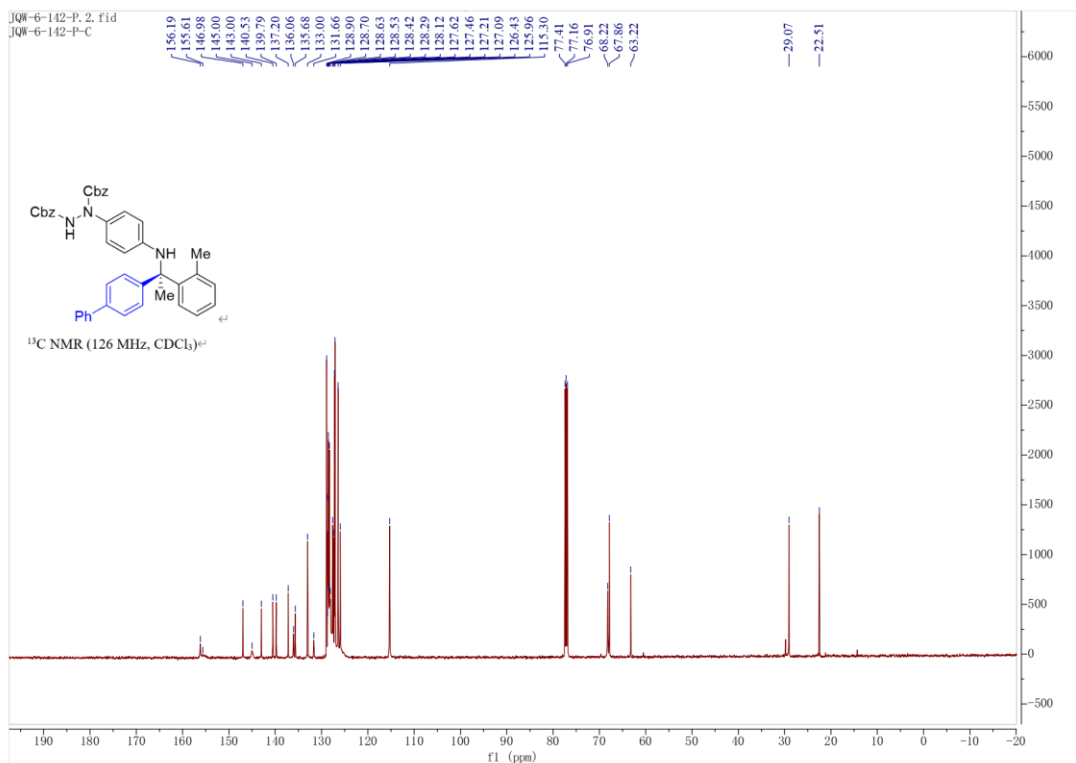



(S)-N-(1-(3-methoxyphenyl)-1-(o-tolyl)ethyl)aniline ((S)-**1k**)

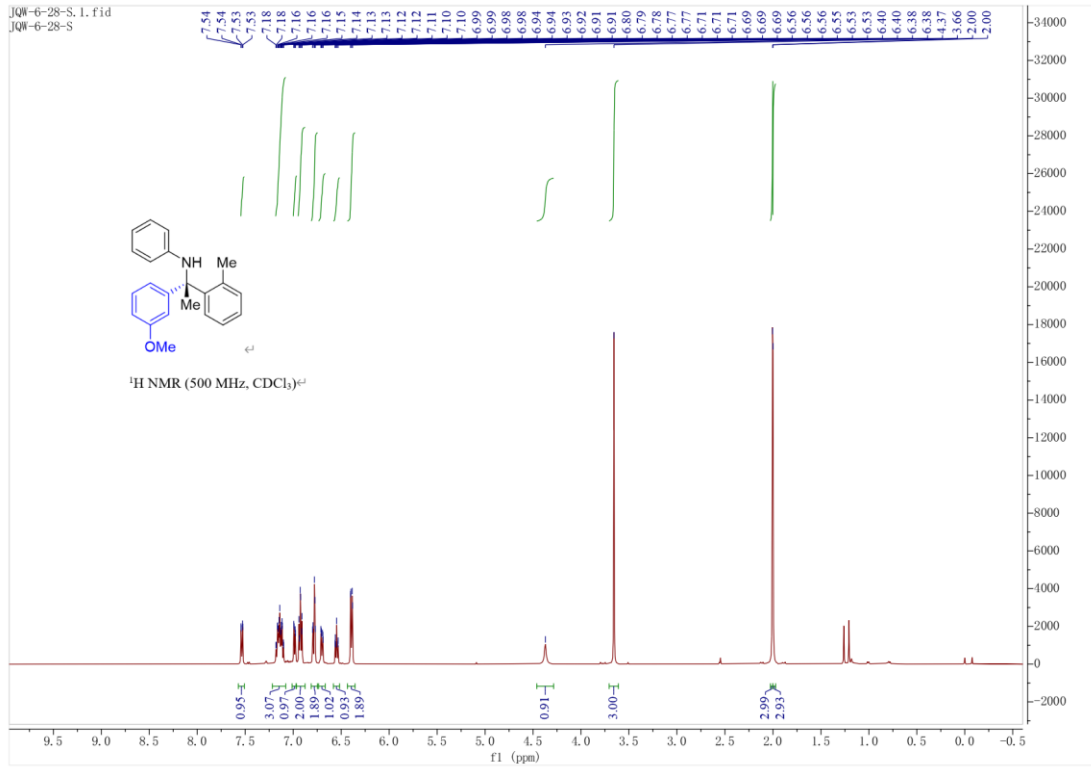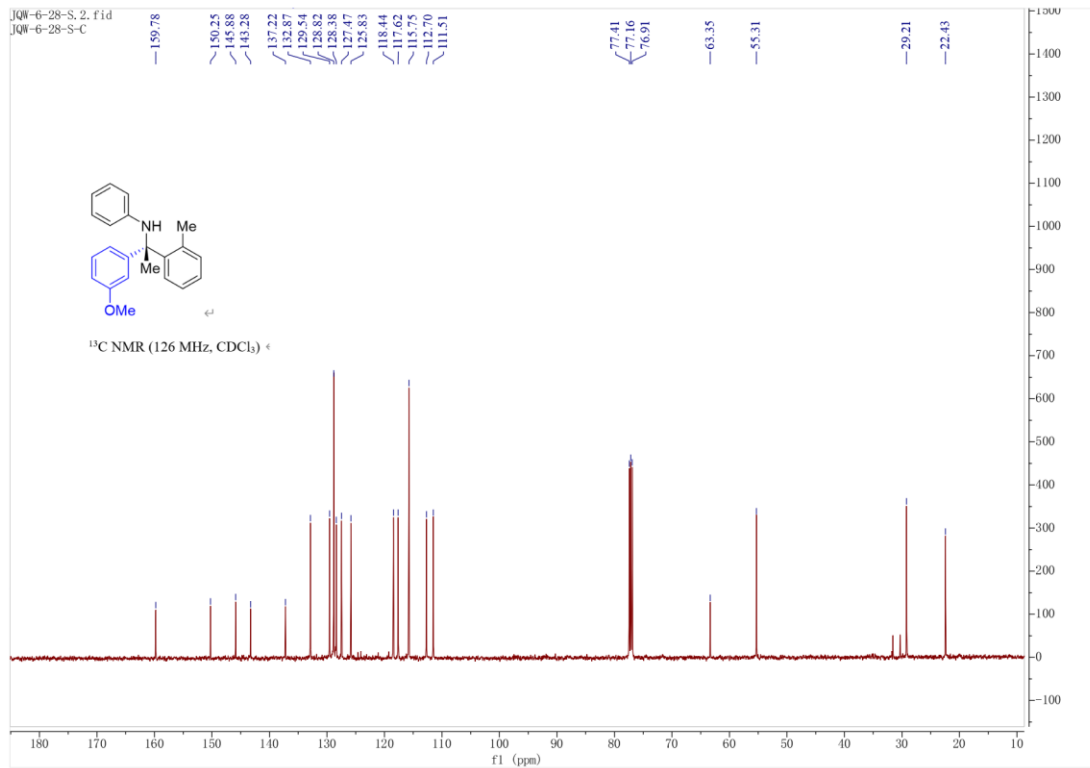

Dibenzyl-(*R*)-1-(4-((1-(3-methoxyphenyl)-1-(*o*-tolyl)ethyl)amino)phenyl)hydrazine-1,2-dicarboxylate (**3k**)

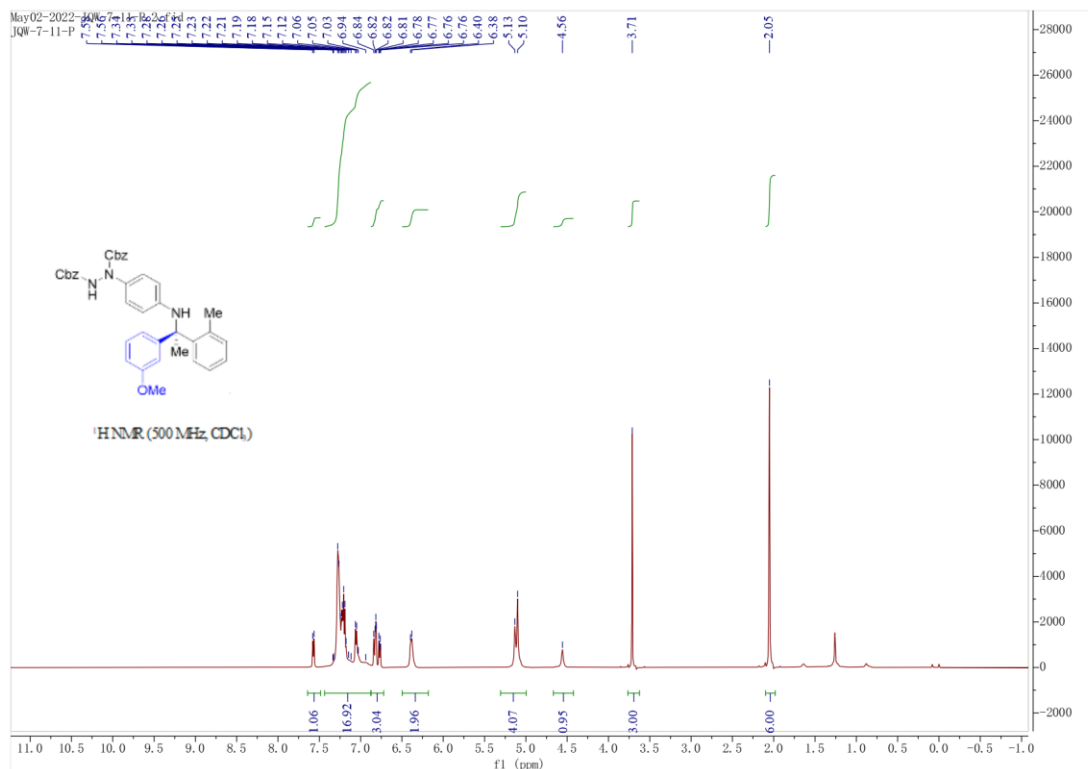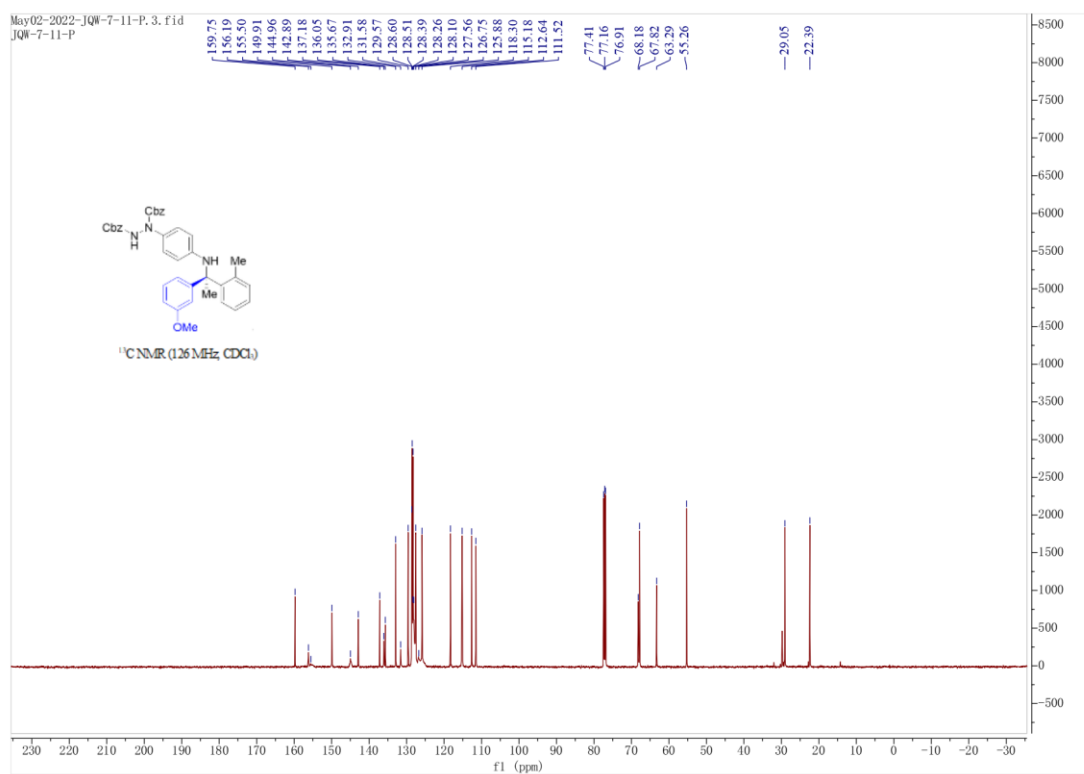

(S)-N-(1-(naphthalen-2-yl)-1-(o-tolyl)ethyl)aniline ((S)-**11**)

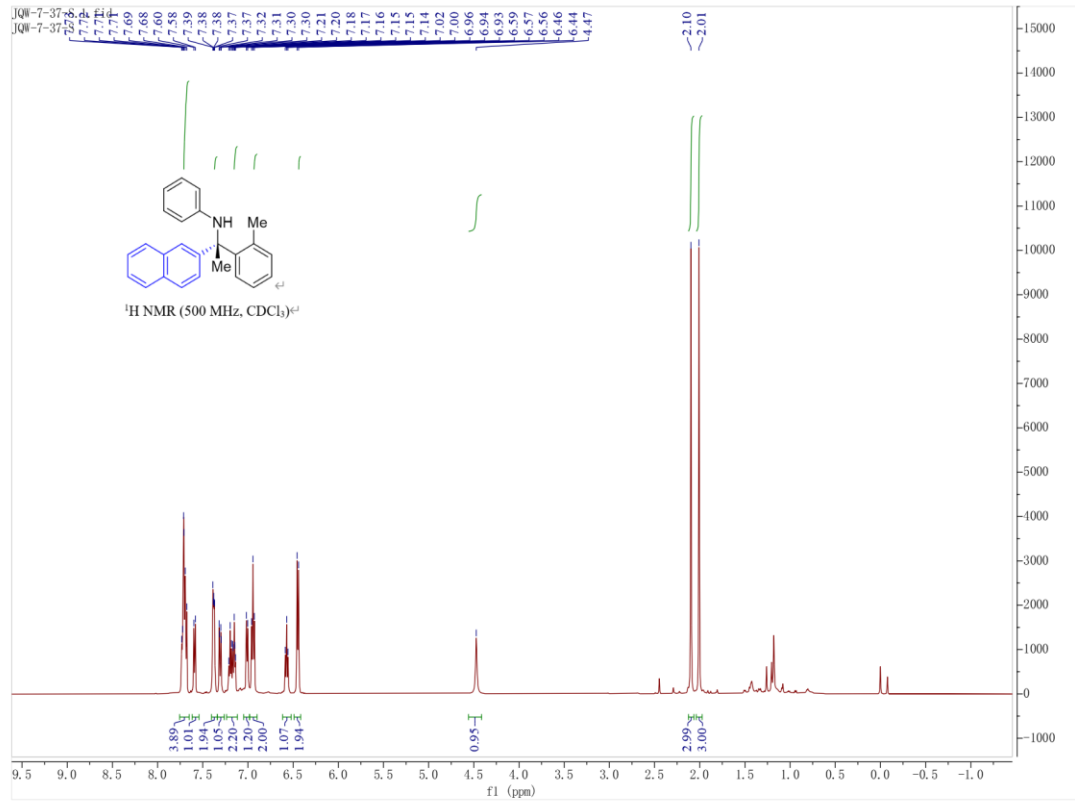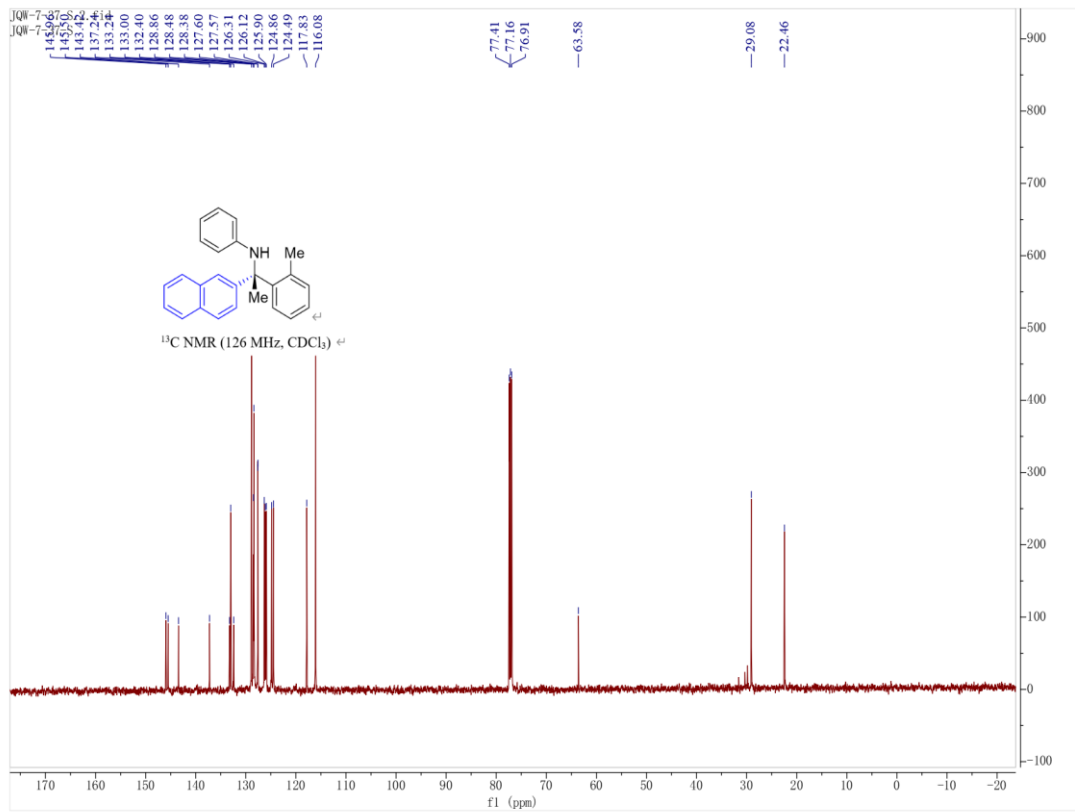

Dibenzyl-(*R*)-1-(4-((1-(naphthalen-2-yl)-1-(*o*-tolyl)ethyl)amino)phenyl)hydrazine-1,2-dicarboxylate (**31**)

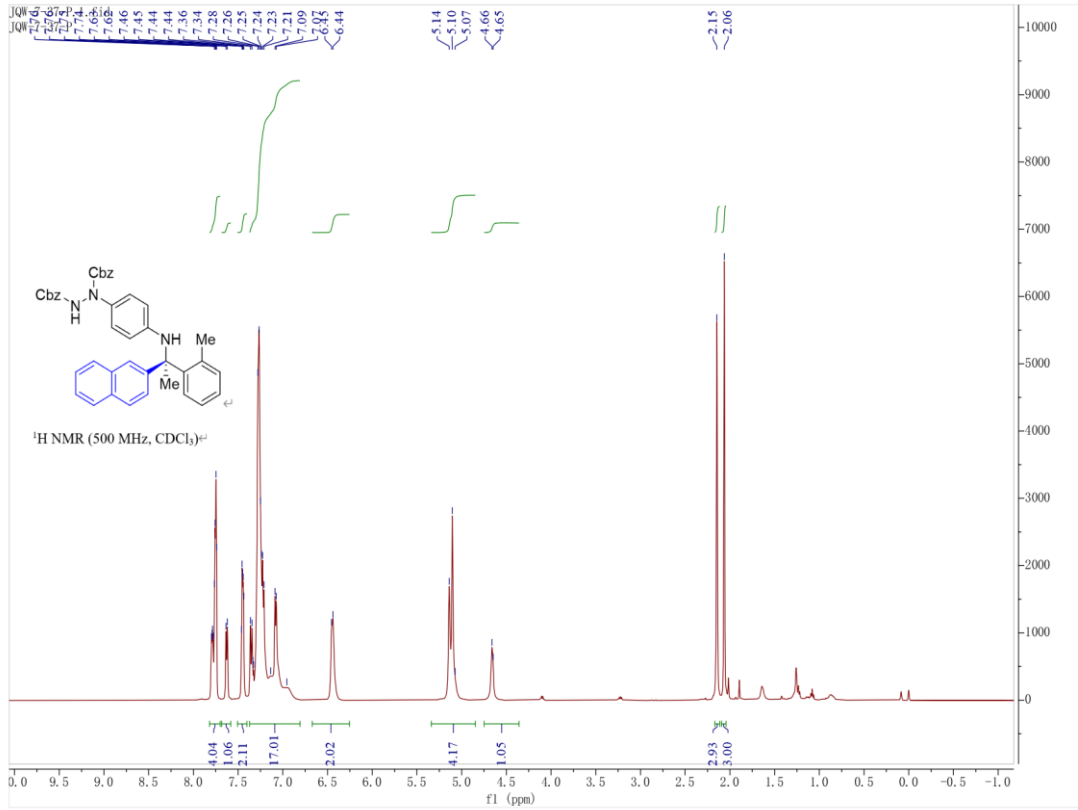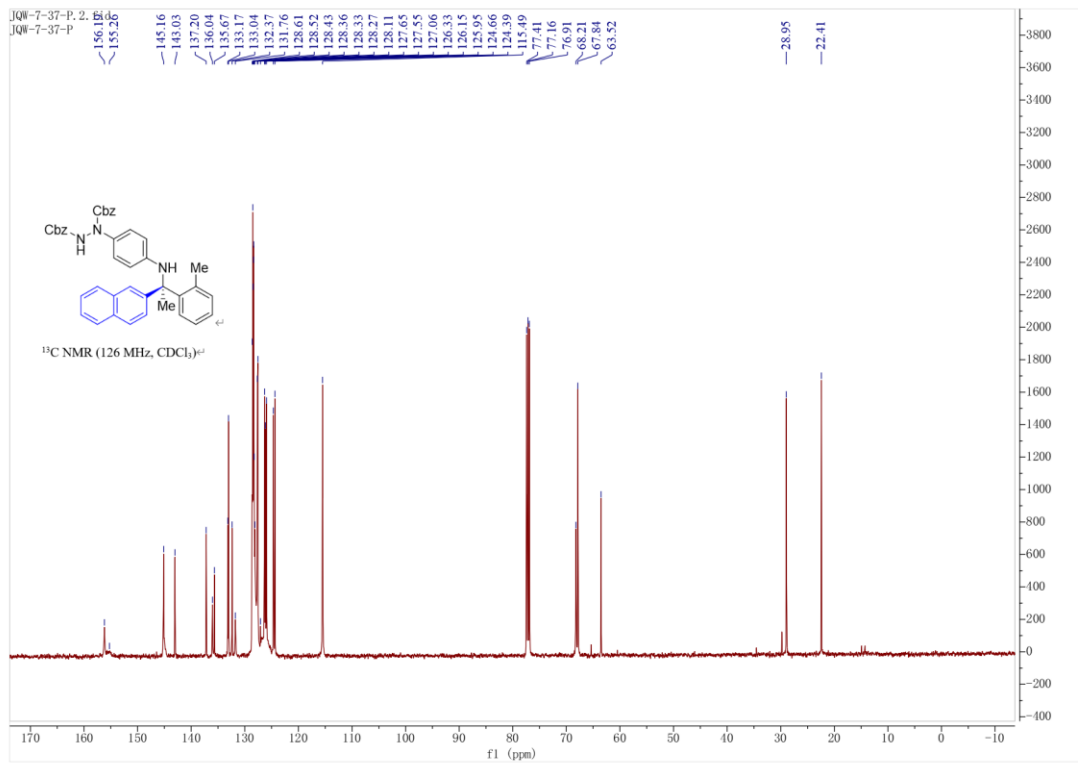

(S)-N-(1-(benzo[d][1,3]dioxol-5-yl)-1-(o-tolyl)ethyl)aniline ((S)-**1m**)

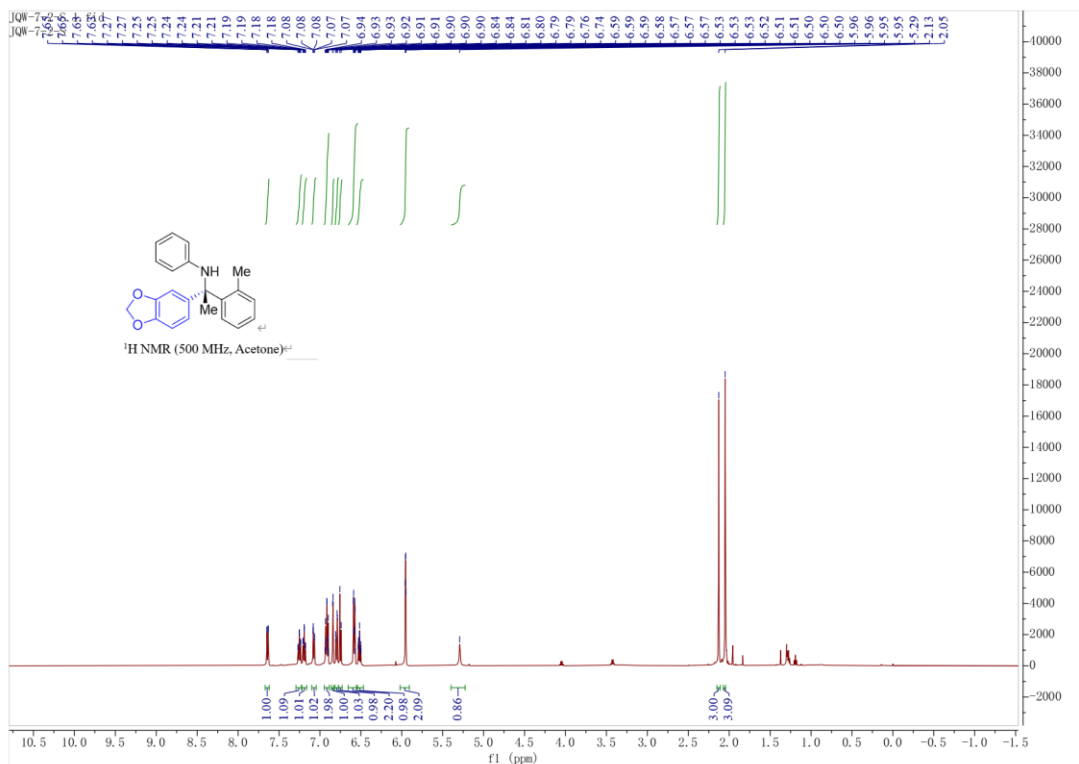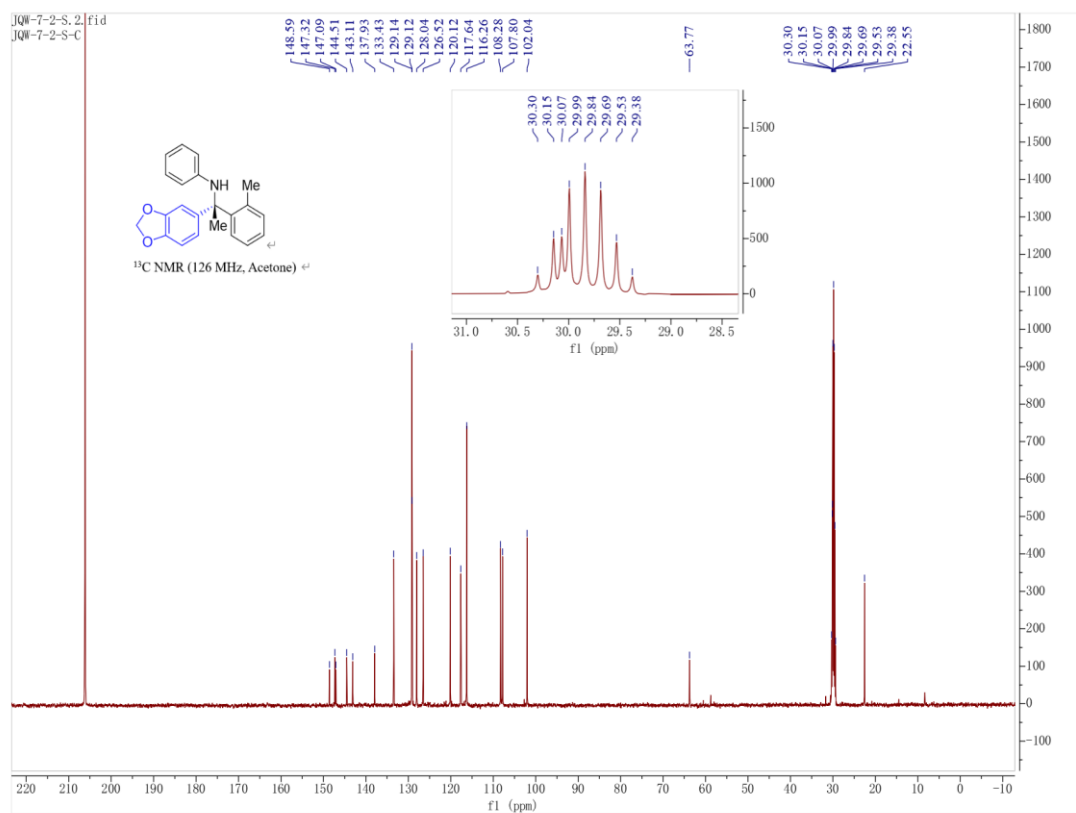

Dibenzyl-(*R*)-1-(4-((1-(benzo[d][1,3]dioxol-5-yl)-1-(*o*-tolyl)ethyl)amino)phenyl)hydrazine-1,2-di-carboxylate (**3m**)

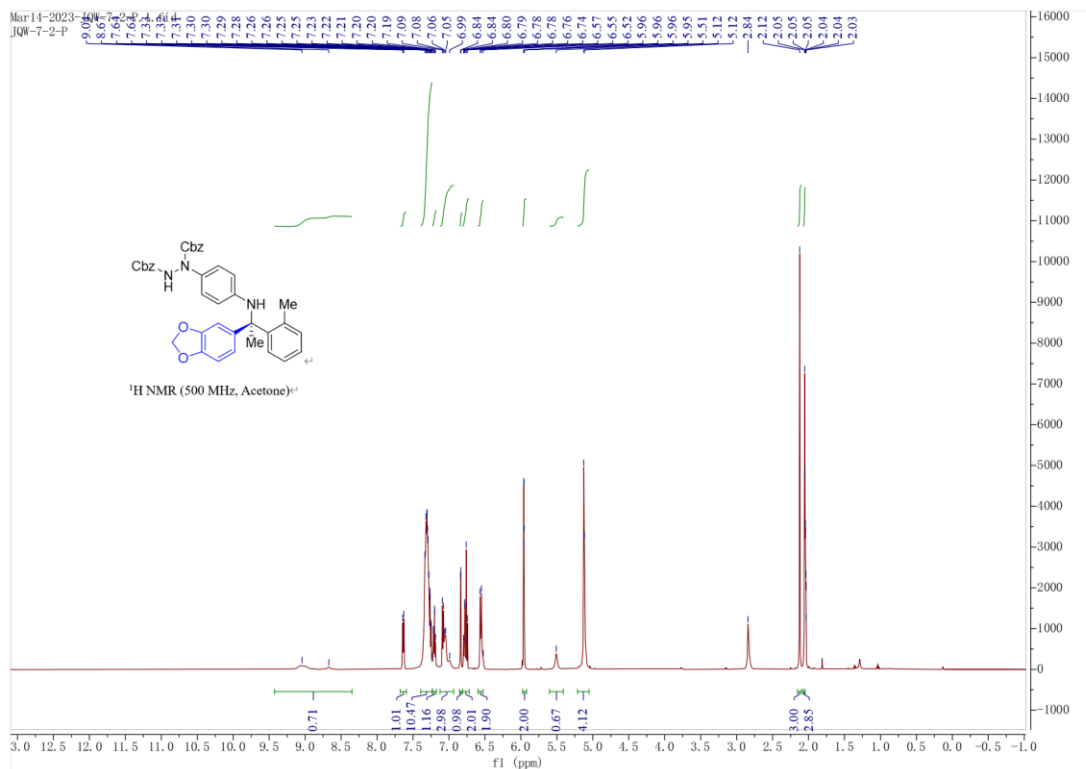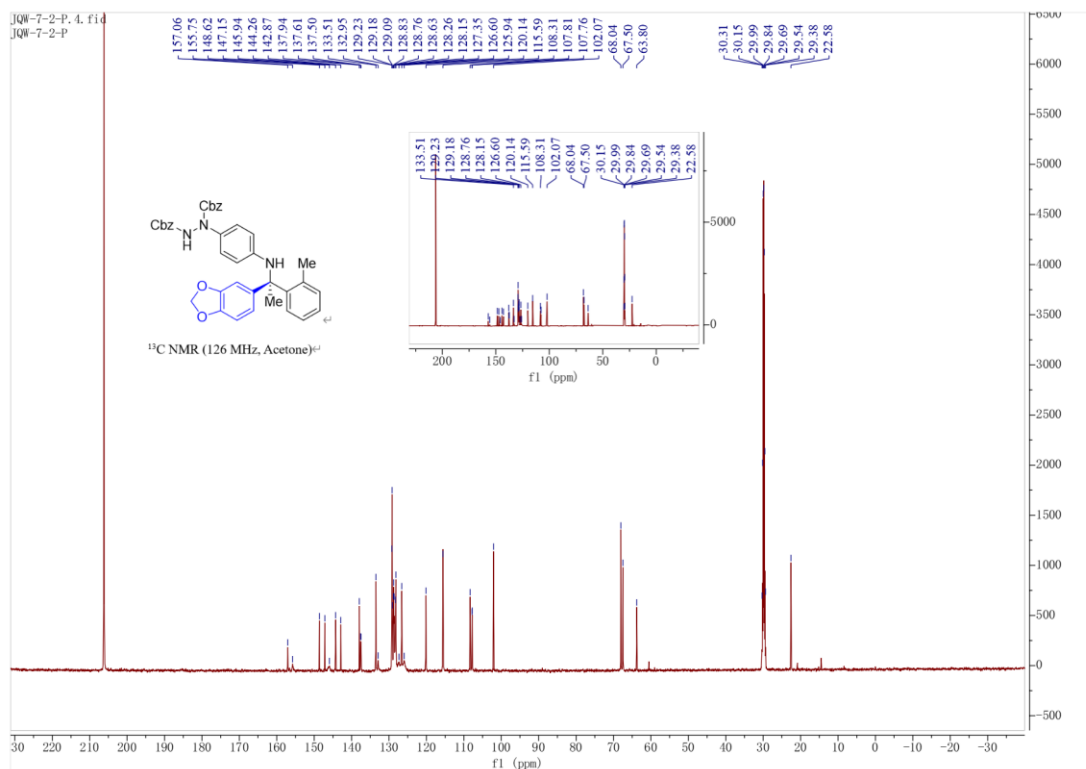

(S)-N-(1-(3-chloro-2-methylphenyl)-1-phenylethyl)aniline ((S)-**1n**)

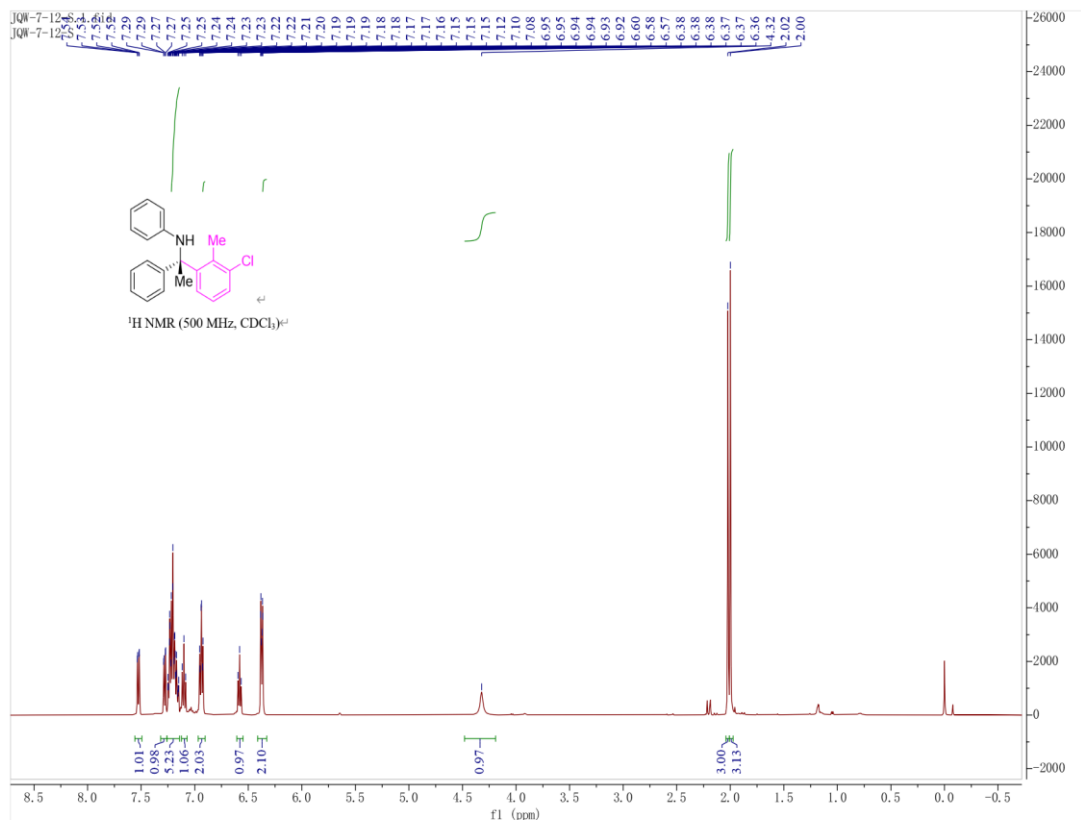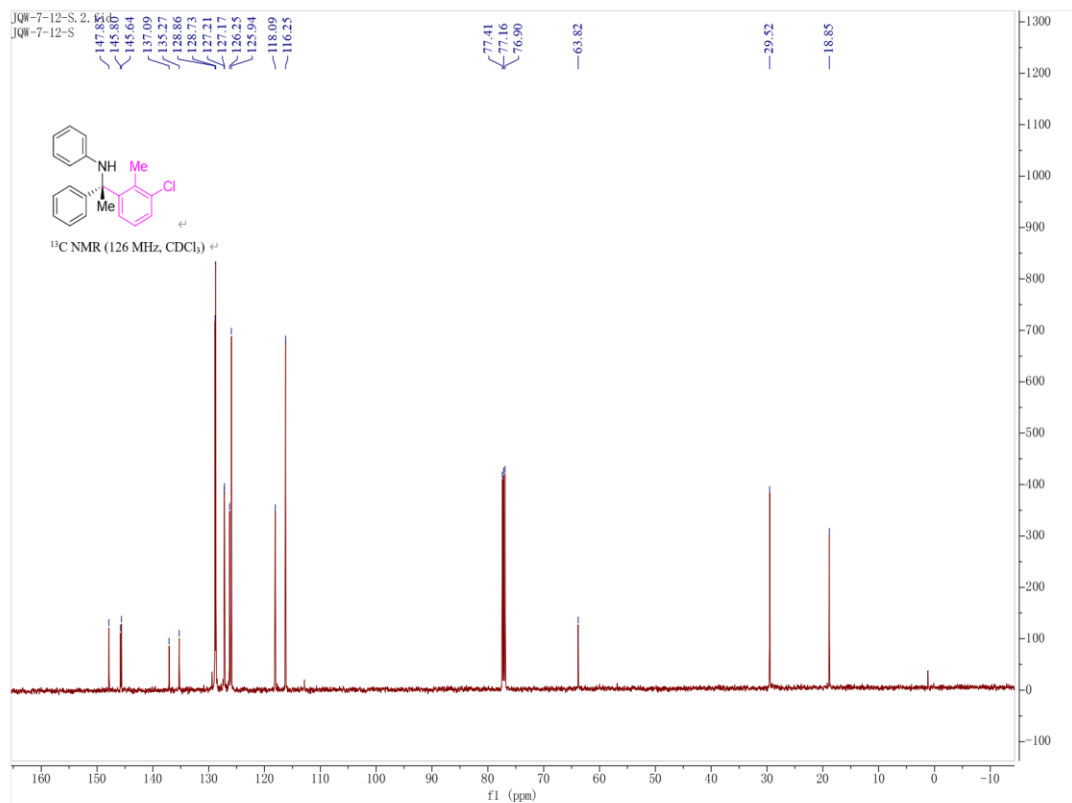

Dibenzyl-(*R*)-1-(4-((1-(3-chloro-2-methylphenyl)-1-phenylethyl)amino)phenyl)hydrazine-1,2-di-carboxylate (**3n**)

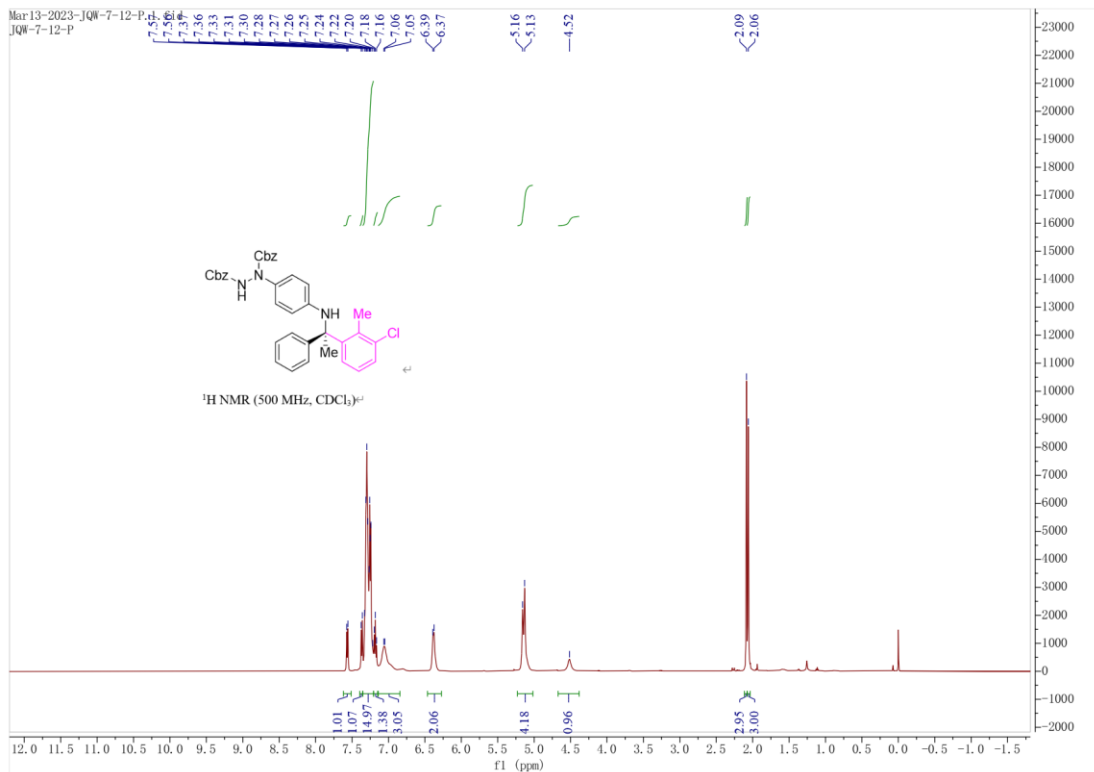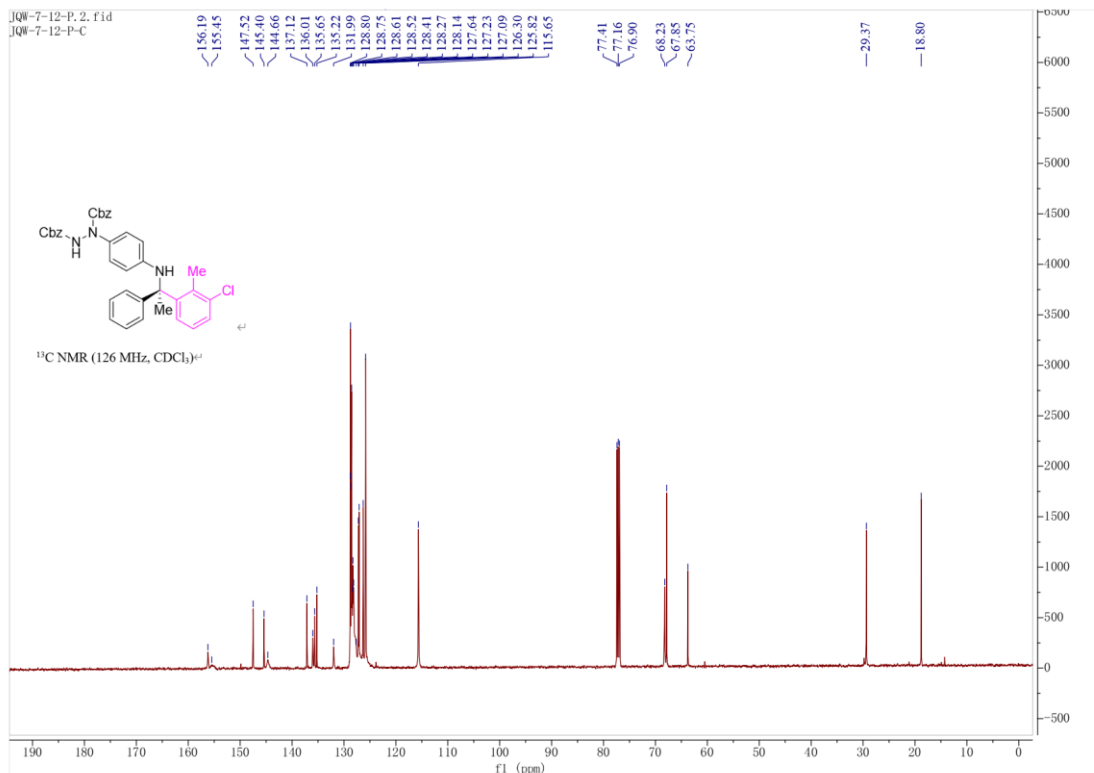



(S)-N-(1-(2,4-dimethylphenyl)-1-phenylethyl)aniline ((S)-1o)

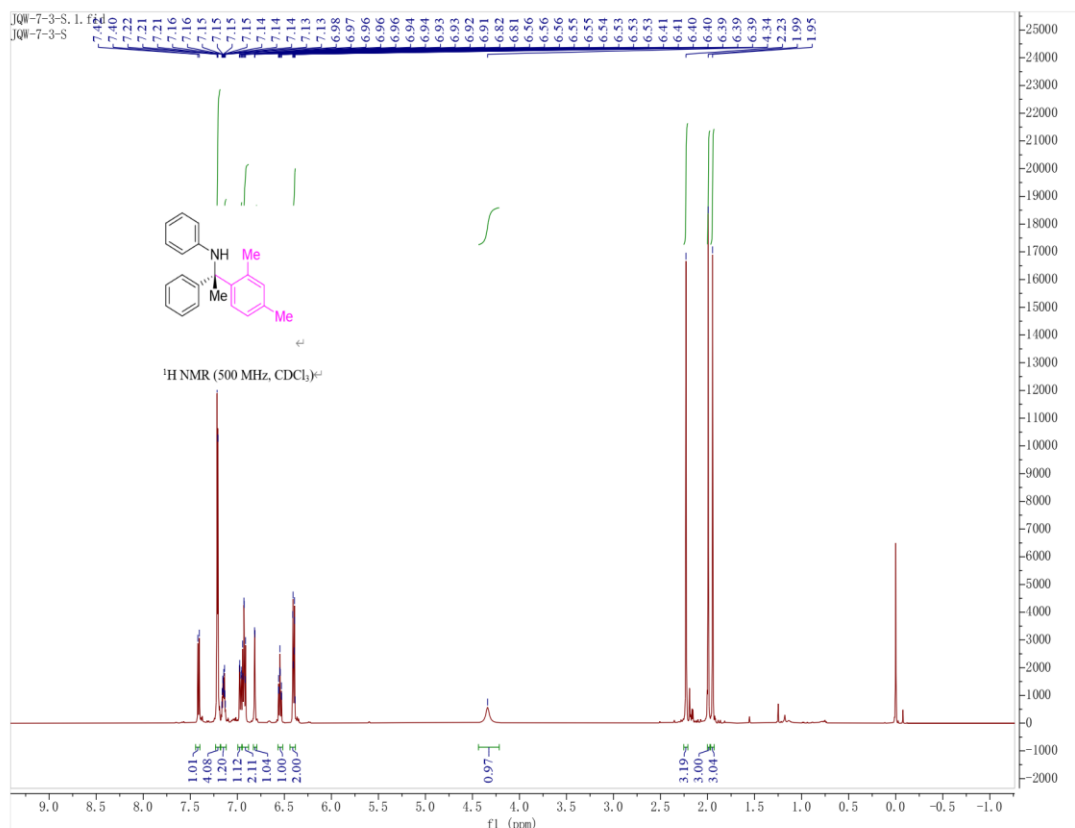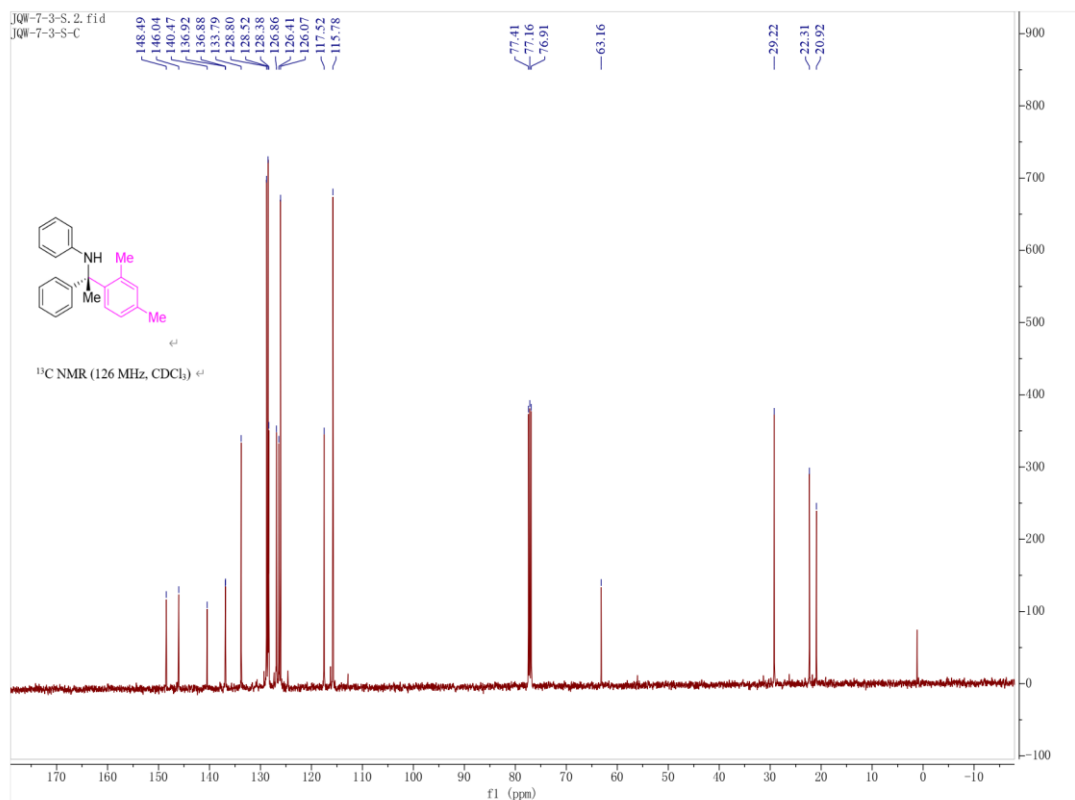

Dibenzyl-(*R*)-1-(4-((1-(2,4-dimethylphenyl)-1-phenylethyl)amino)phenyl)hydrazine-1,2-dicarboxylate (**30**)

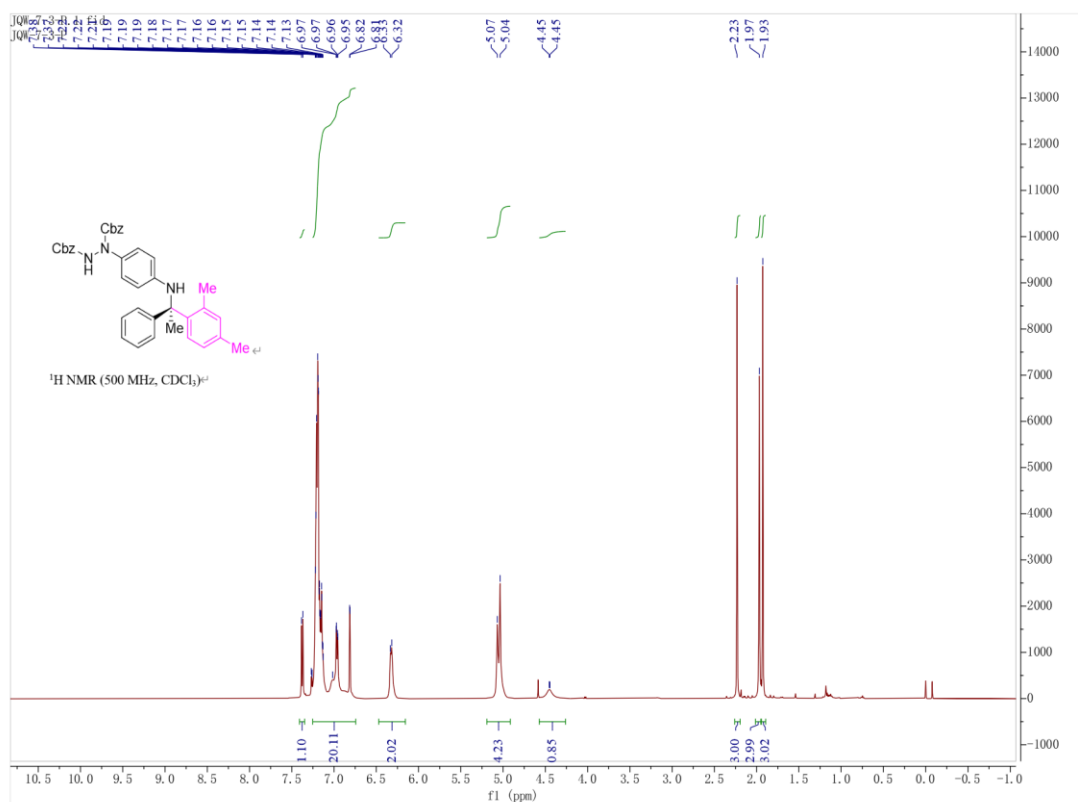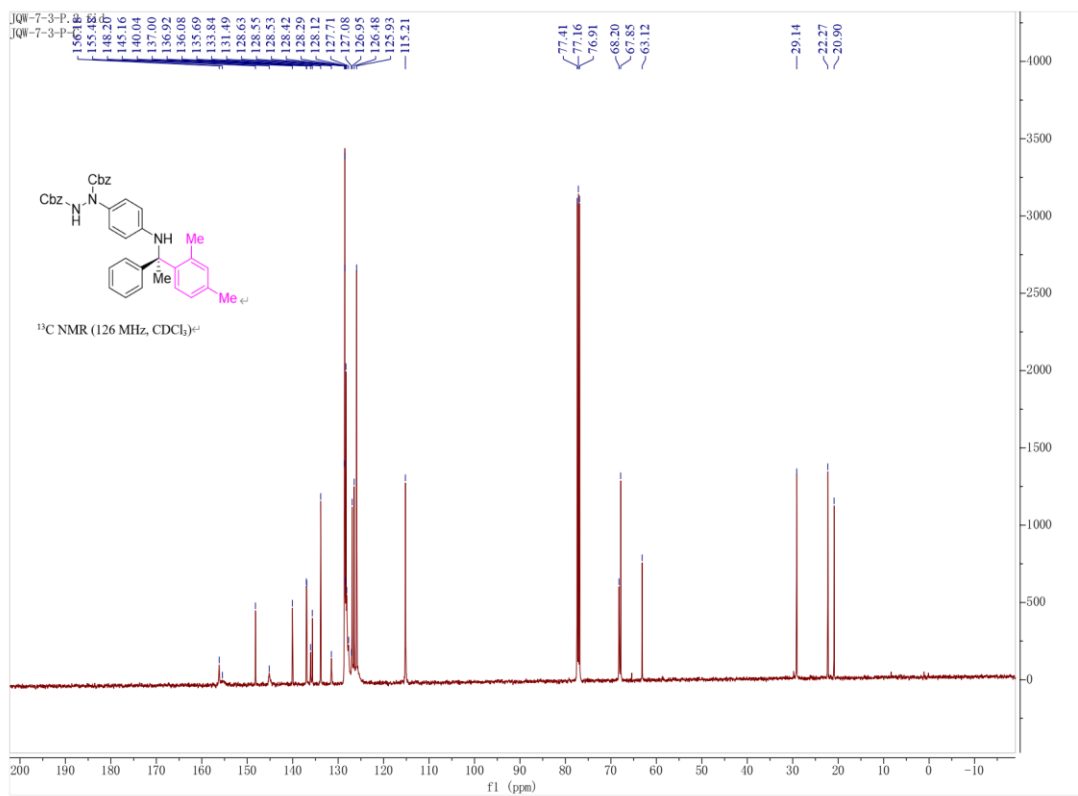

(S)-N-(1-(4-chloro-2-methylphenyl)-1-phenylethyl)aniline ((S)-**1p**)

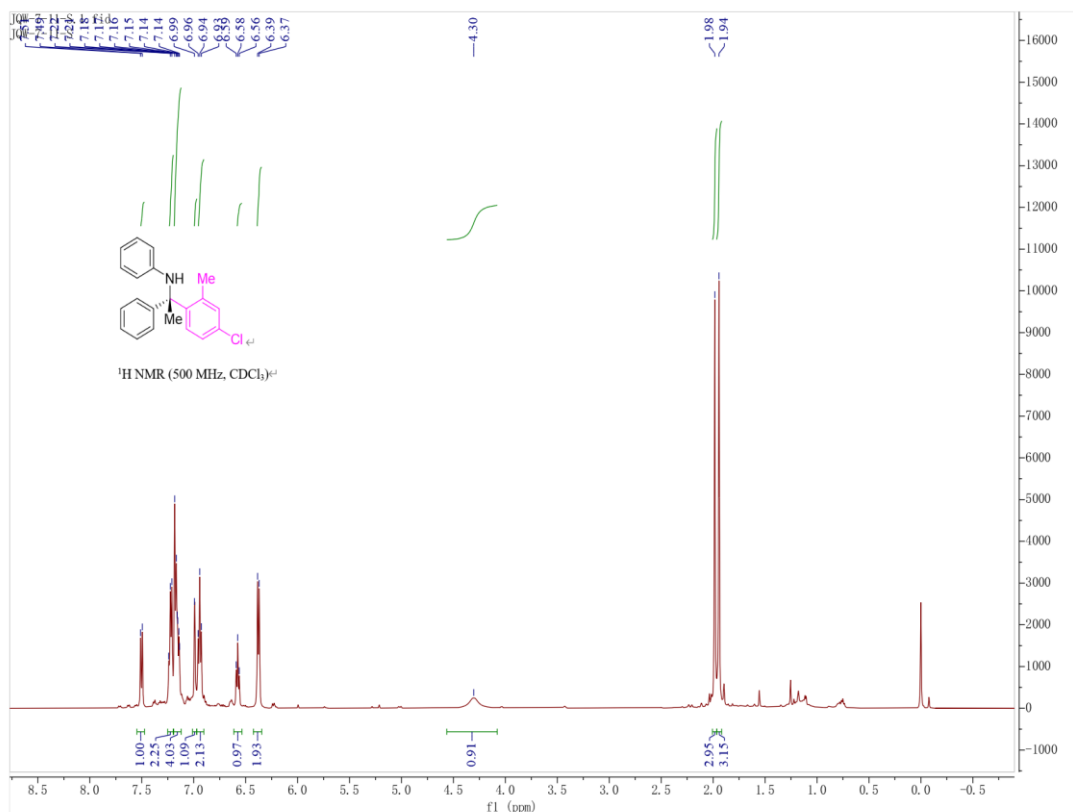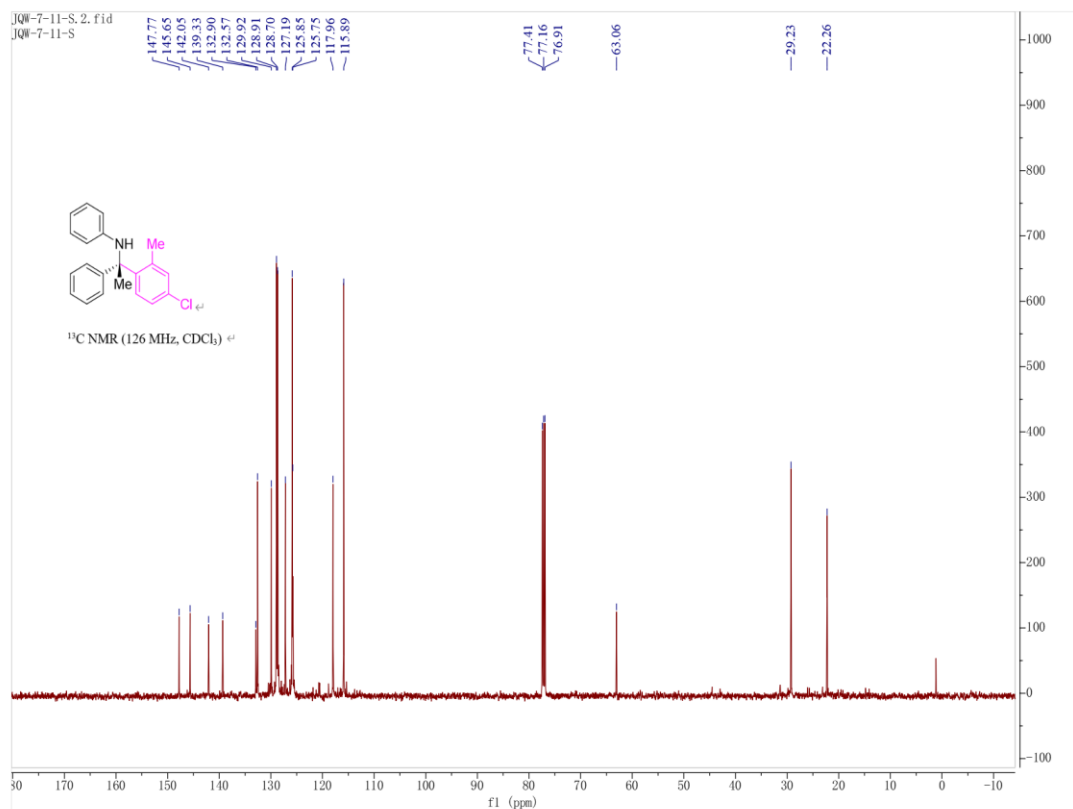

Dibenzyl-(*R*)-1-(4-((1-(4-chloro-2-methylphenyl)-1-phenylethyl)amino)phenyl)hydrazine-1,2-di-carboxylate (**3p**)

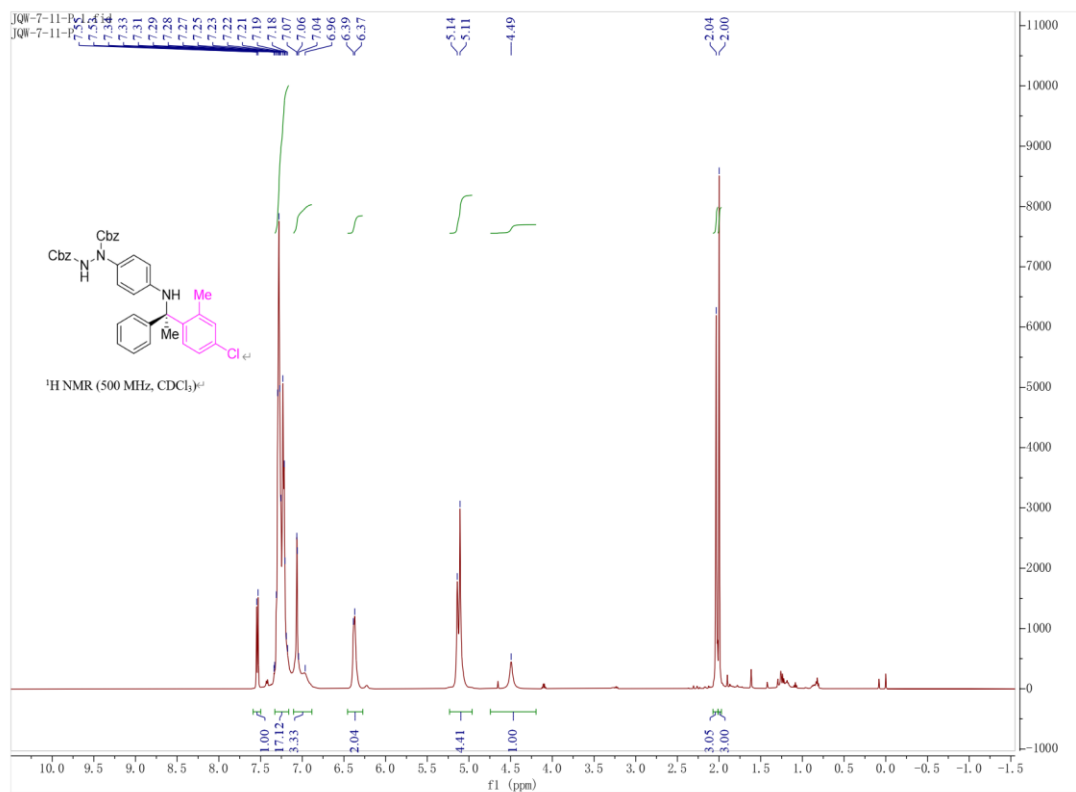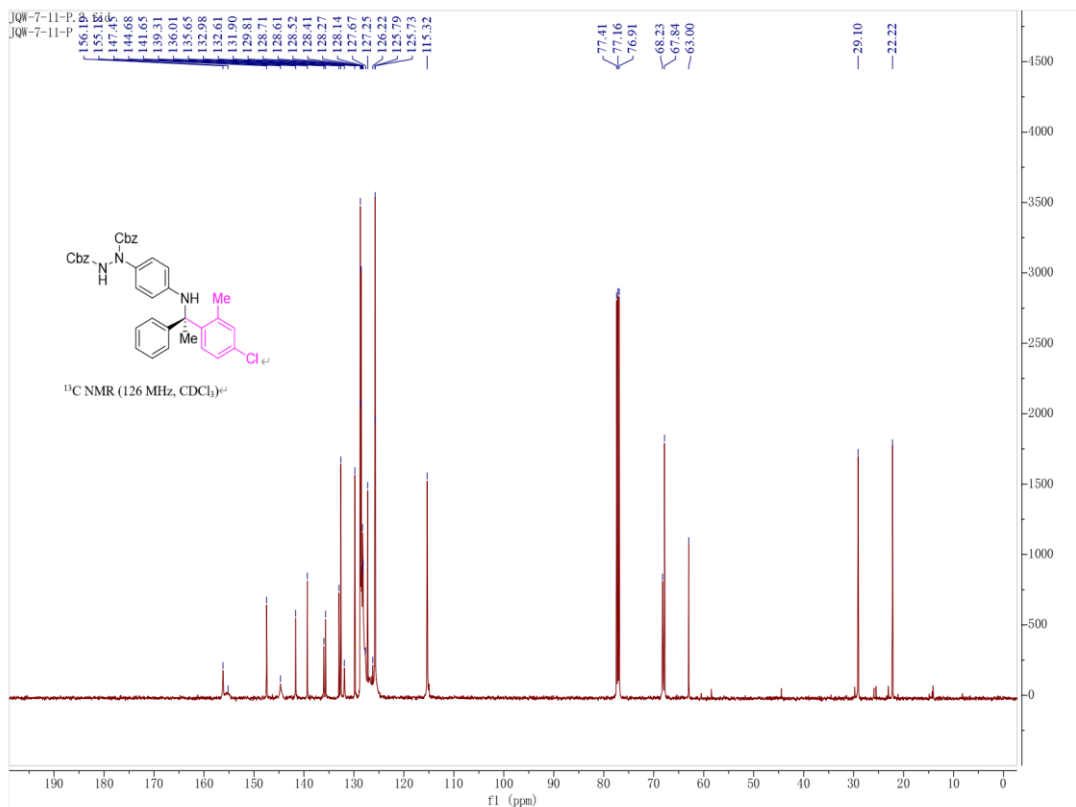

(S)-N-(1-(4-methoxy-2-methylphenyl)-1-phenylethyl)aniline ((S)-1q)

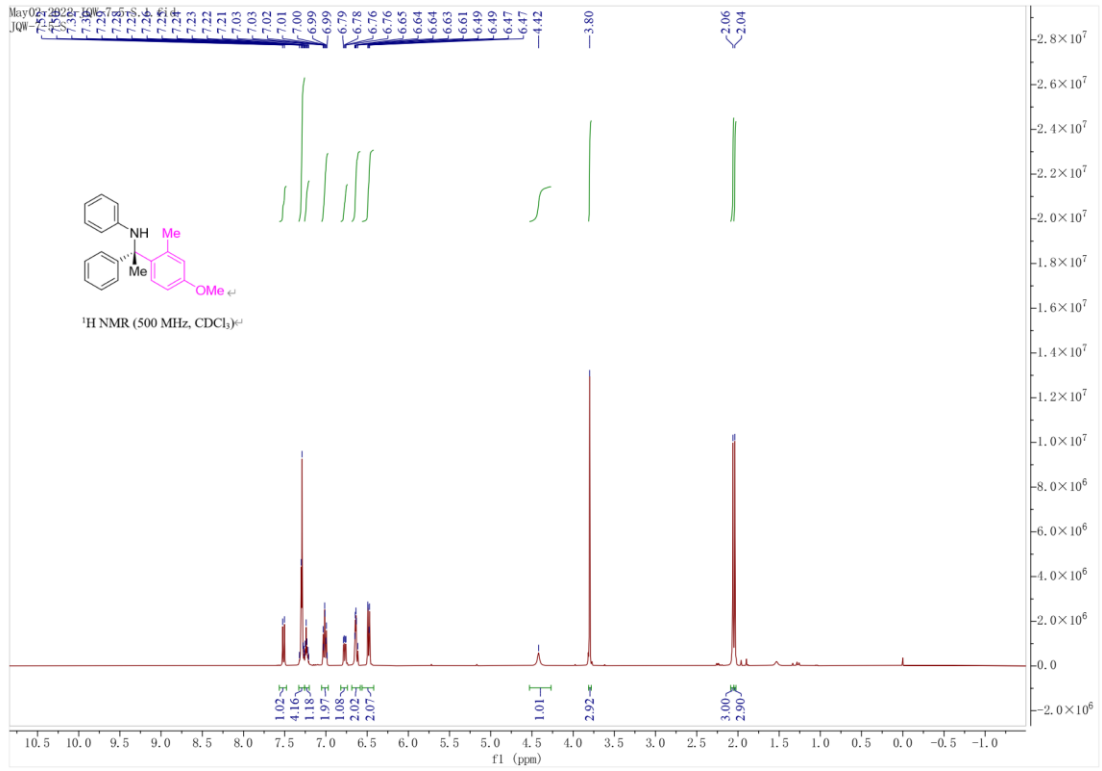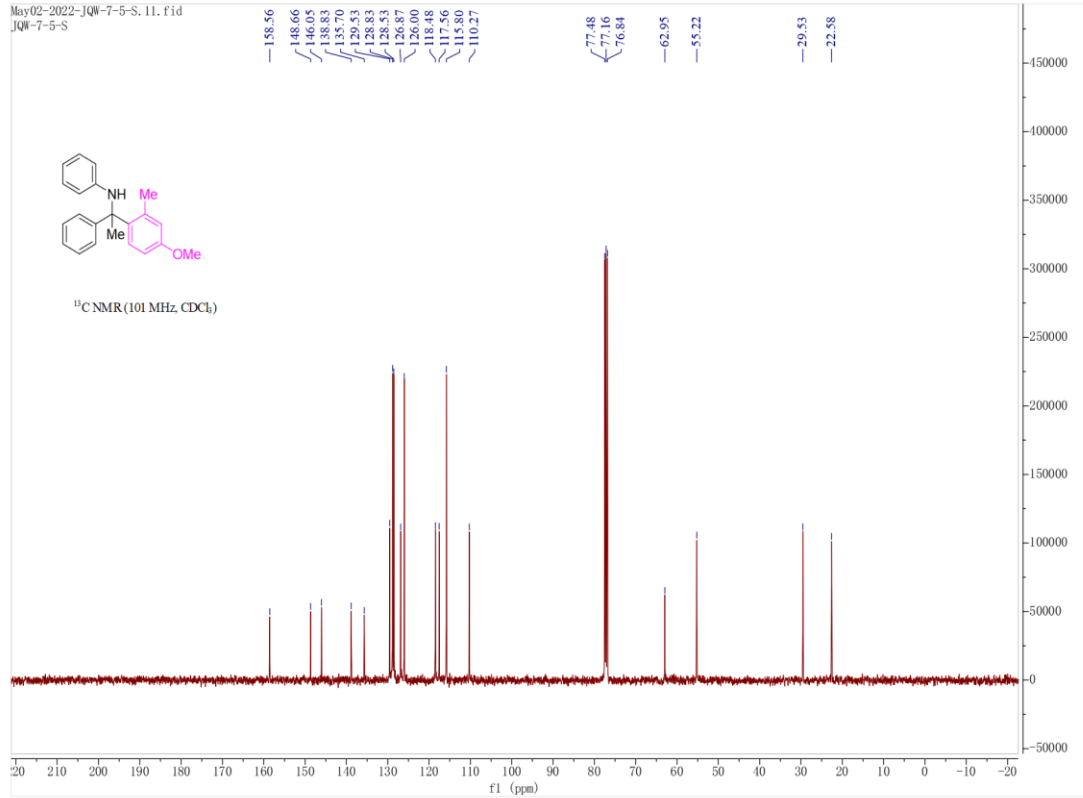

Dibenzyl(R)-1-(4-((1-(4-methoxy-2-methylphenyl)-1-phenylethyl)amino)phenyl)hydrazine-1,  
2-di-carboxylate (**3q**)

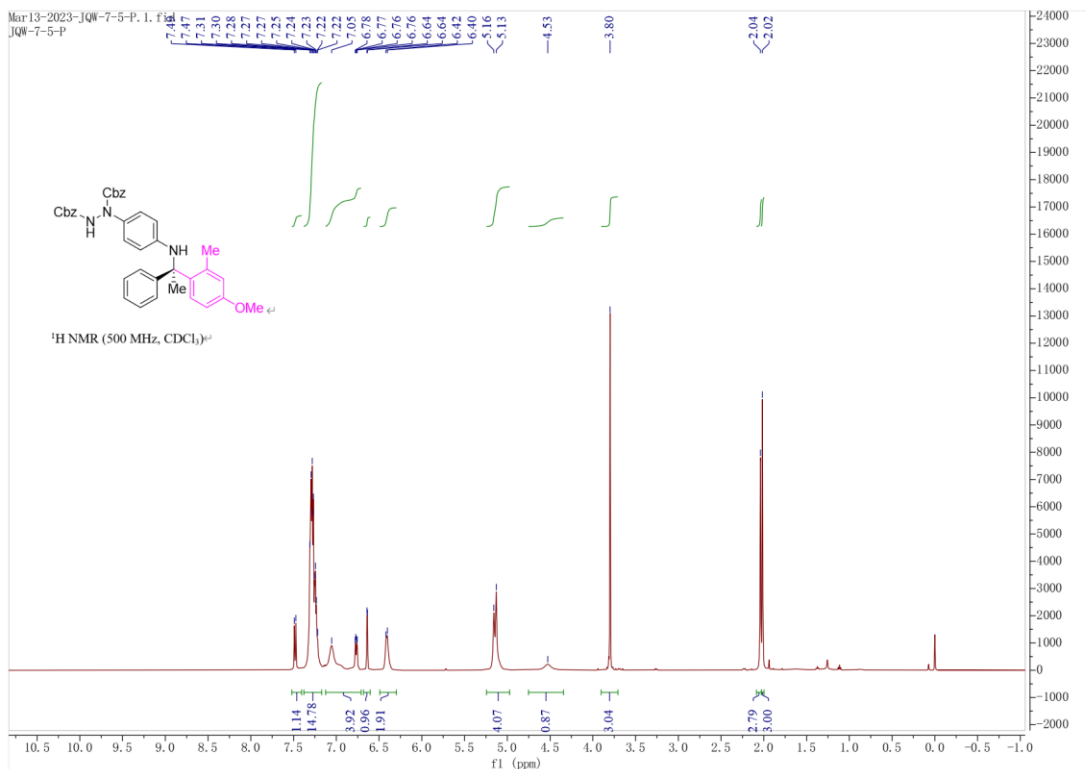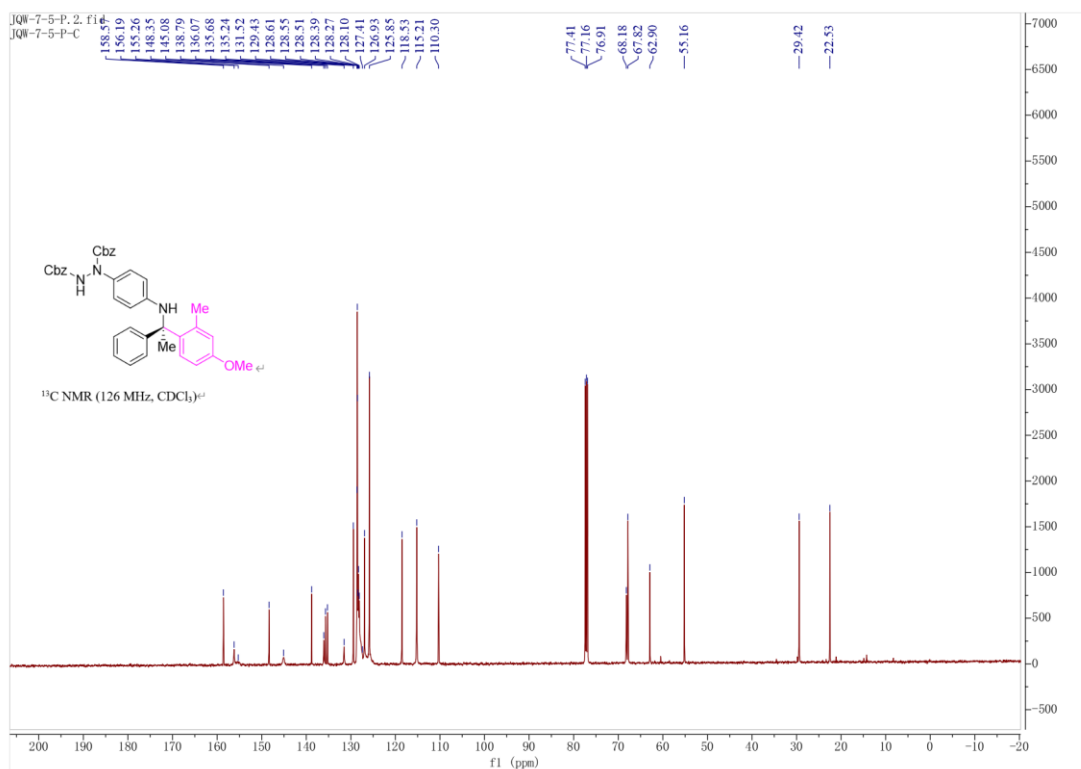

(S)-N-(1-(2,5-dimethylphenyl)-1-phenylethyl)aniline ((S)-**1r**)

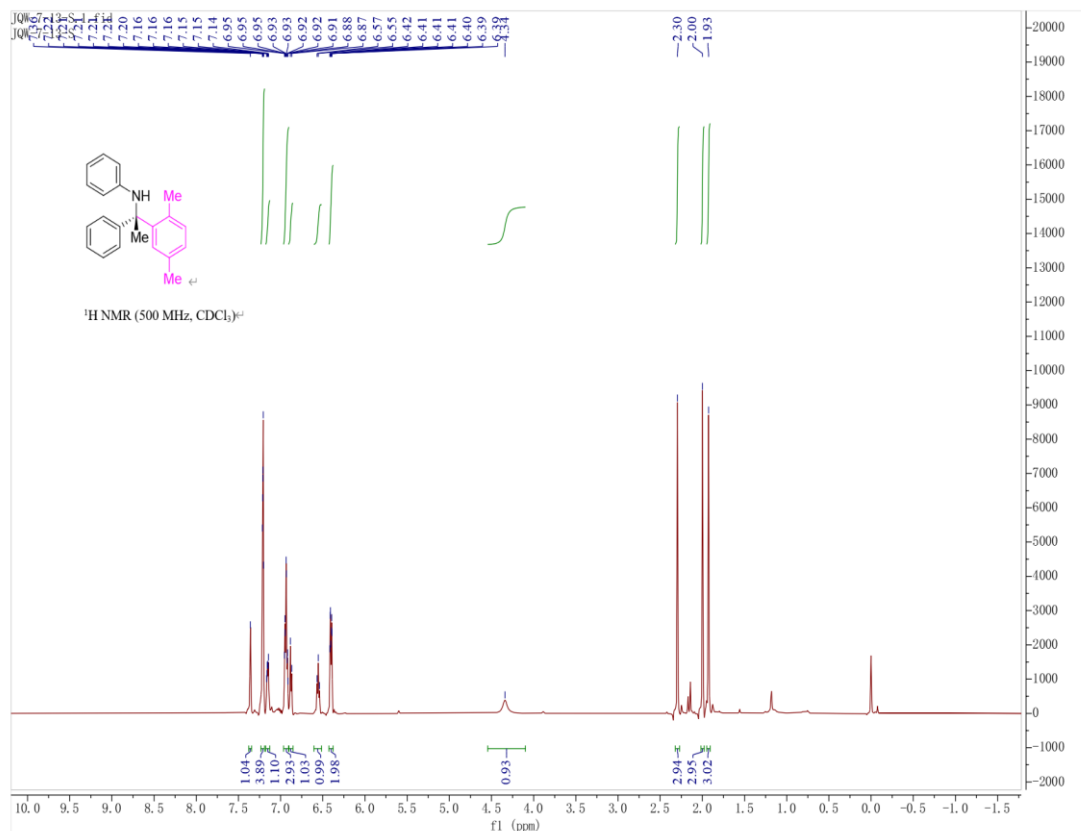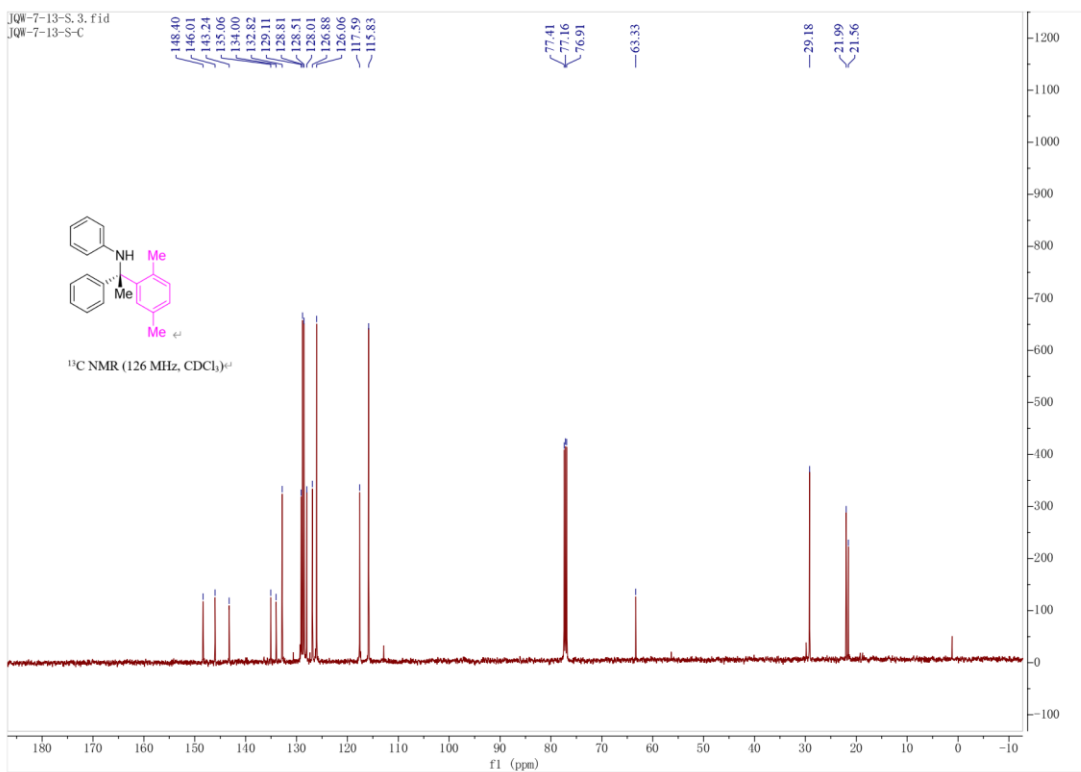

Dibenzyl-(*R*)-1-(4-((1-(2,5-dimethylphenyl)-1-phenylethyl)amino)phenyl)hydrazine-1,2-dicarboxylate (**3r**)

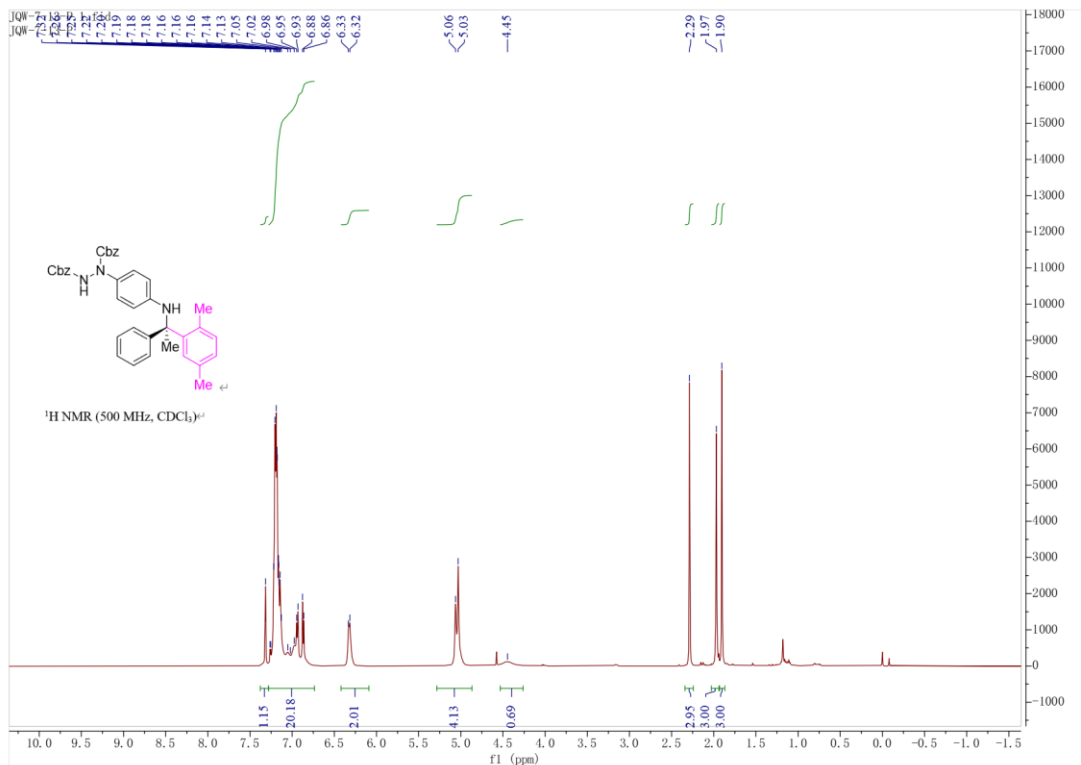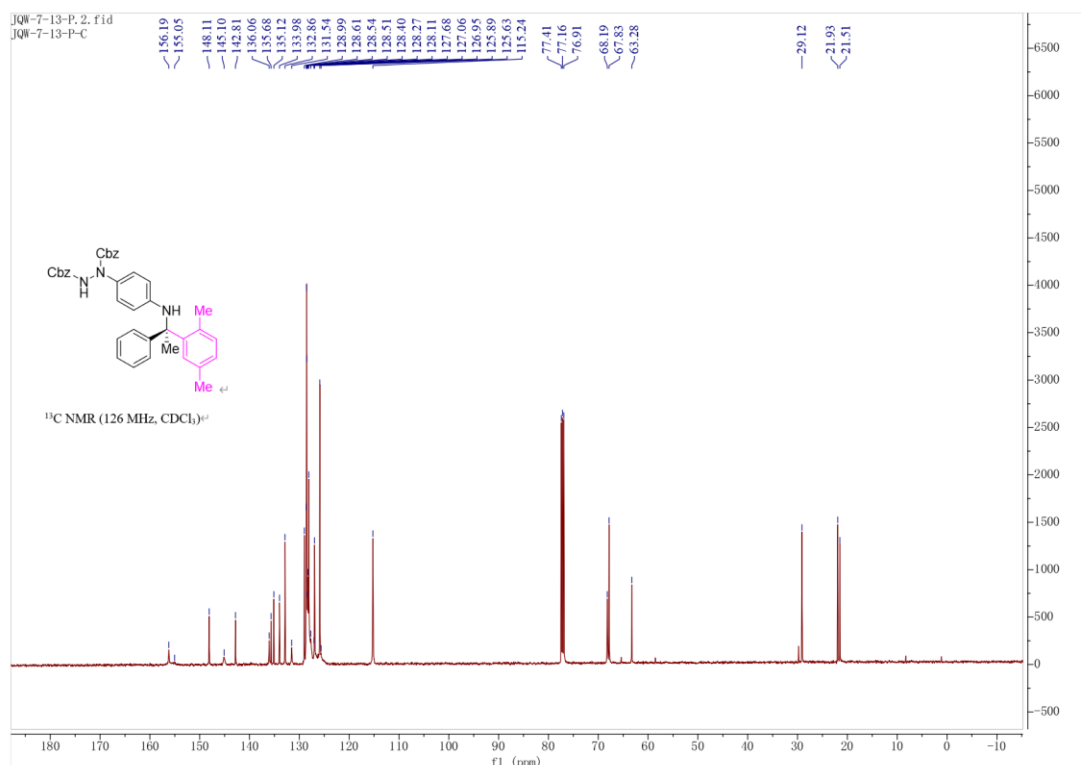



(S)-N-(1-(5-methoxy-2-methylphenyl)-1-phenylethyl)aniline ((S)-1s)

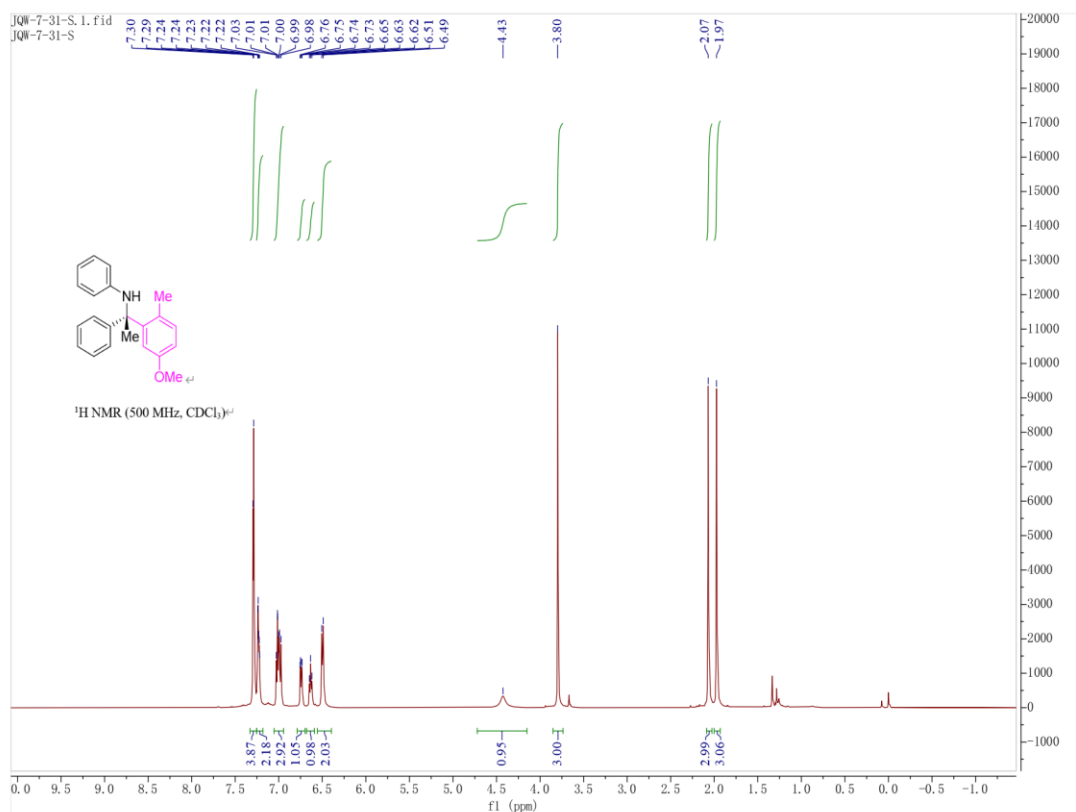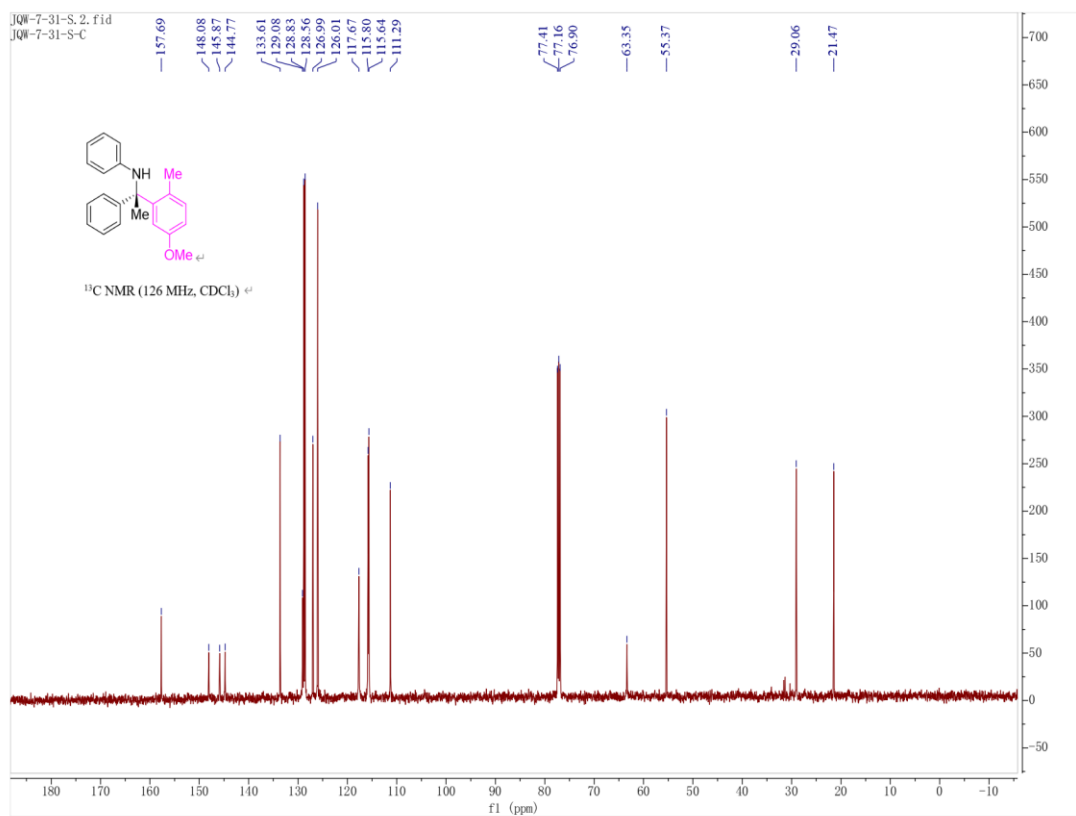

Dibenzyl(R)-1-(4-((1-(5-methoxy-2-methylphenyl)-1-phenylethyl)amino)phenyl)hydrazine-1,2-di-carboxylate (**3s**)

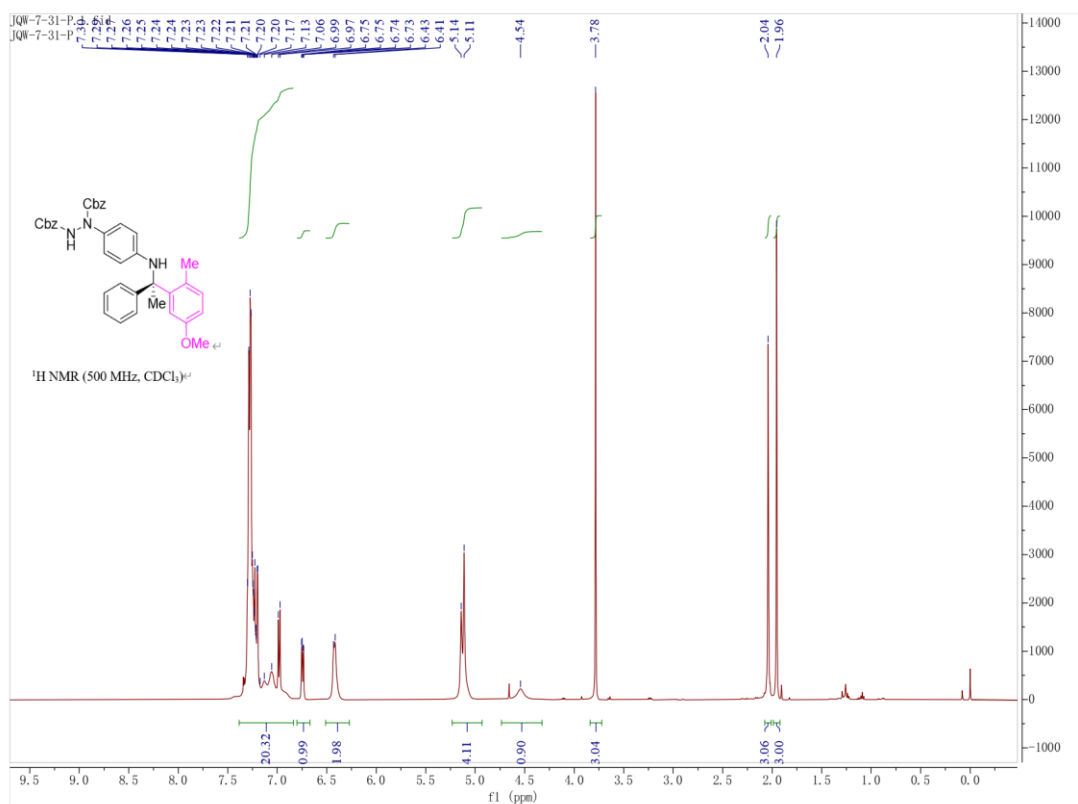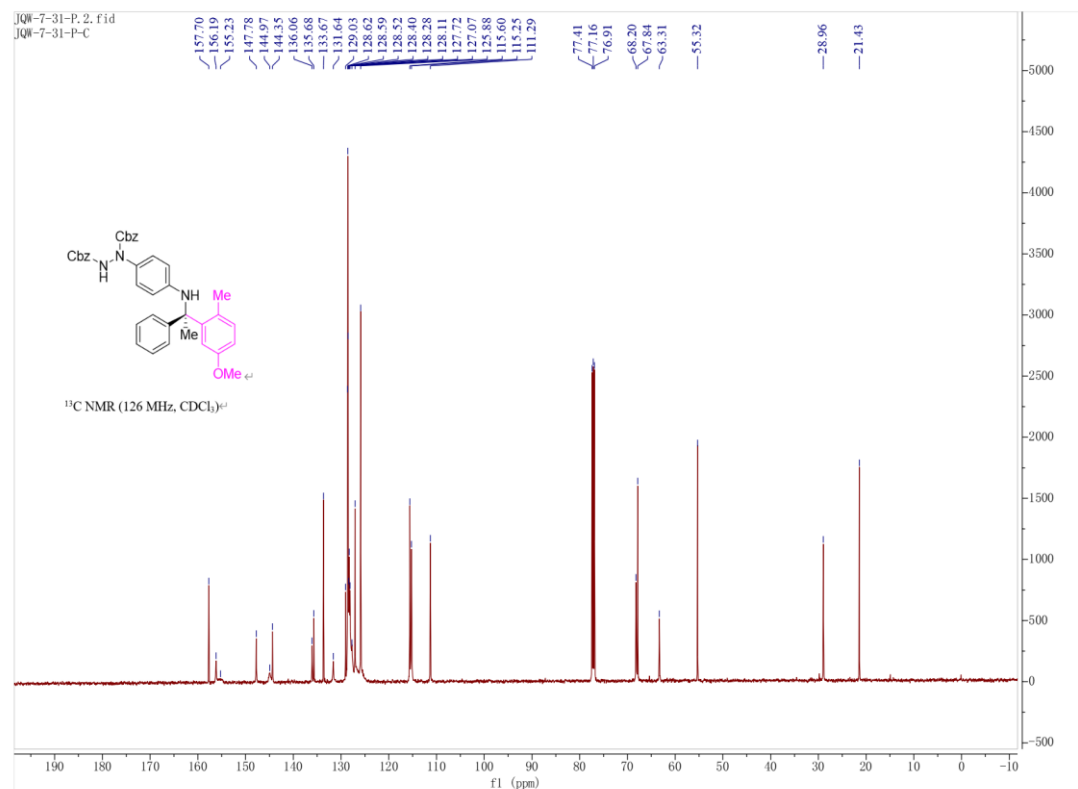

(S)-N-(1-(2-ethylphenyl)-1-phenylethyl)aniline ((S)-1t)

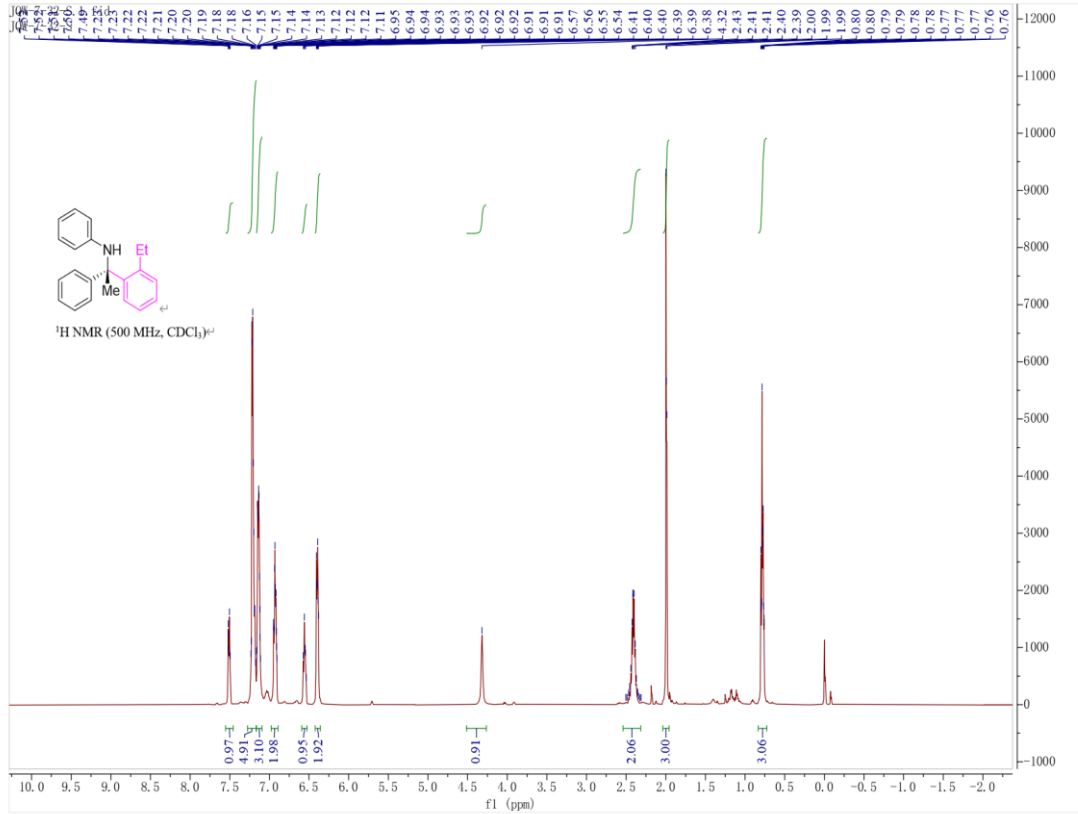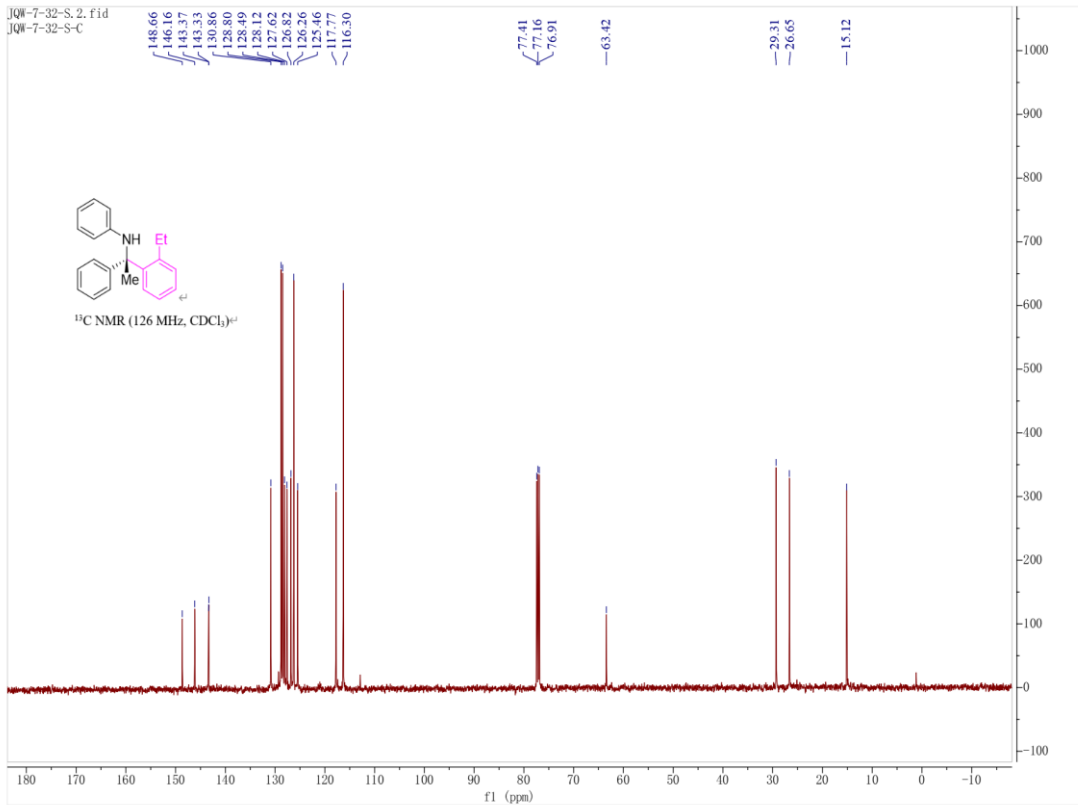

Dibenzyl-(*R*)-1-(4-((1-(2-ethylphenyl)-1-phenylethyl)amino)phenyl)hydrazine-1,2-dicarboxylate (**3f**)

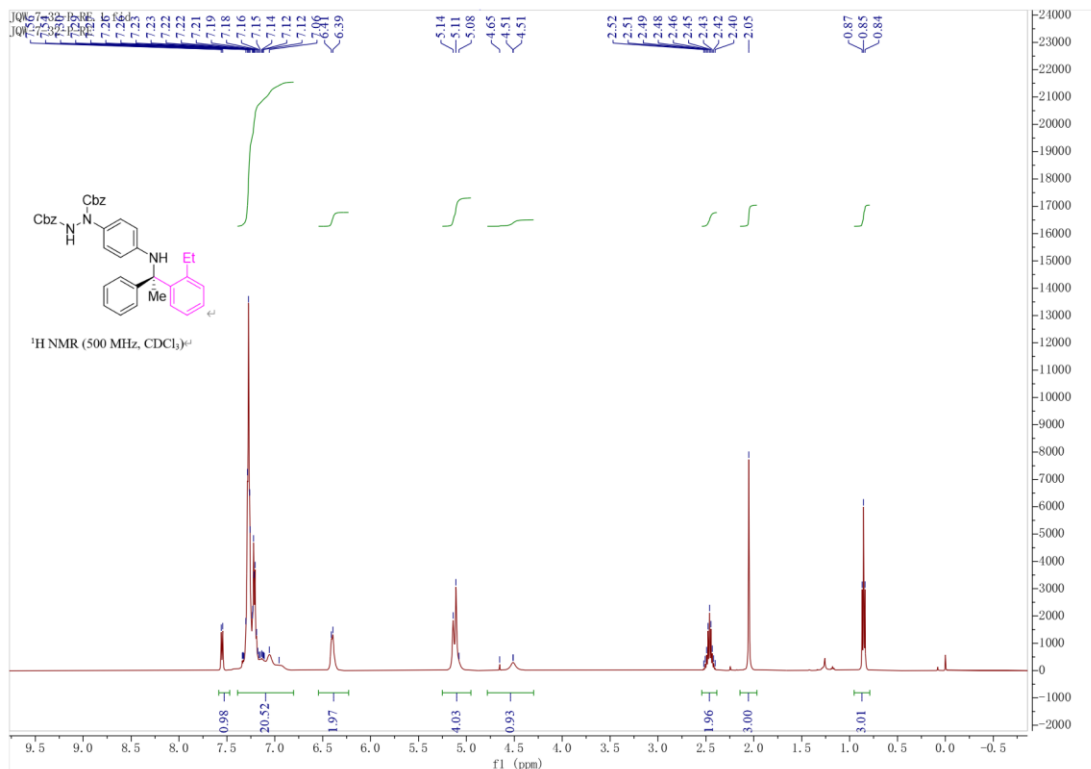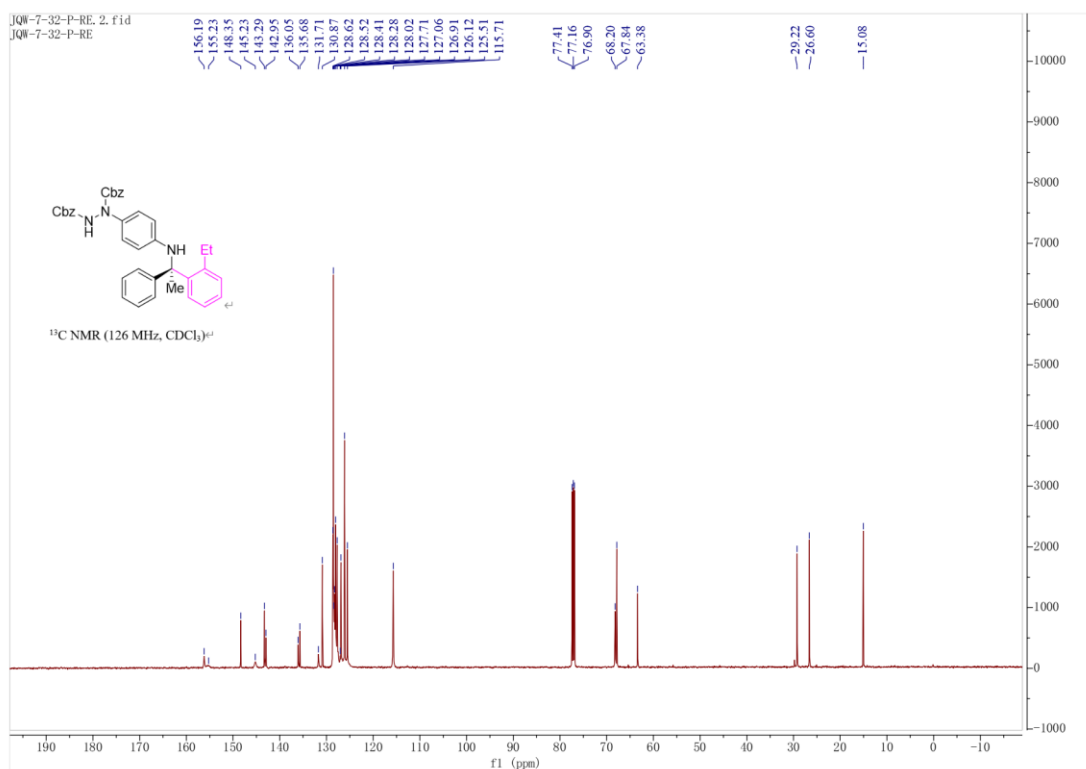

(S)-N-(1-(naphthalen-1-yl)-1-phenylethyl)aniline ((S)-**1u**)

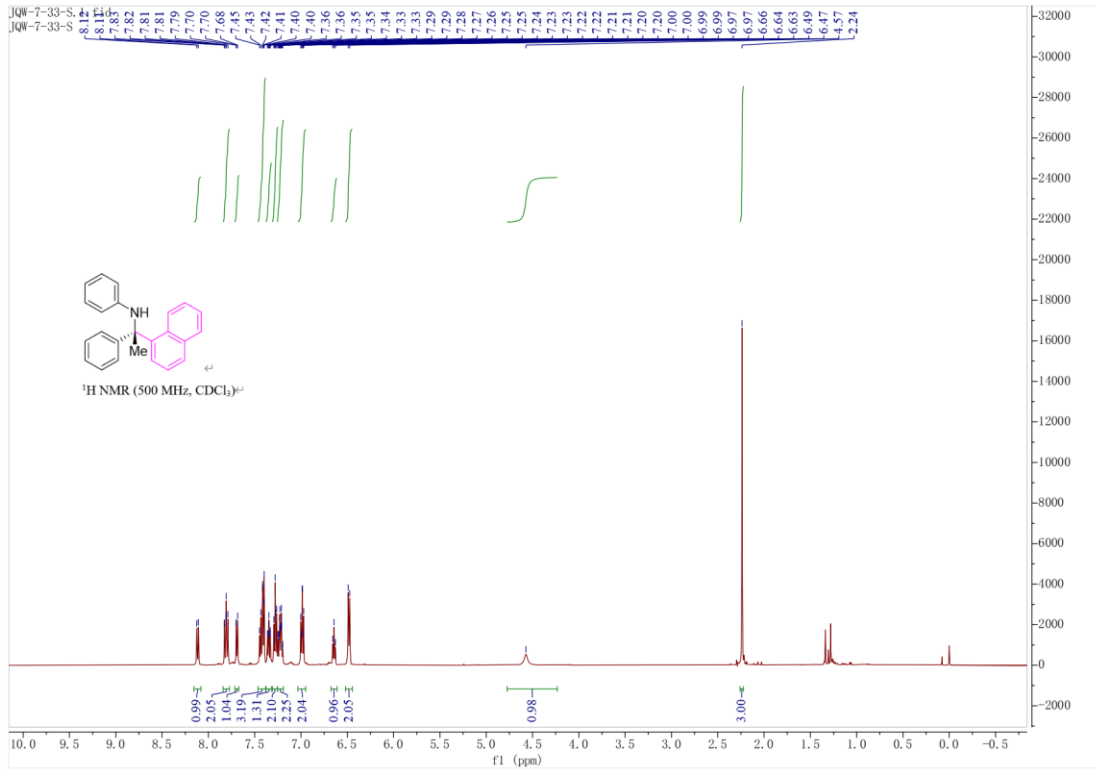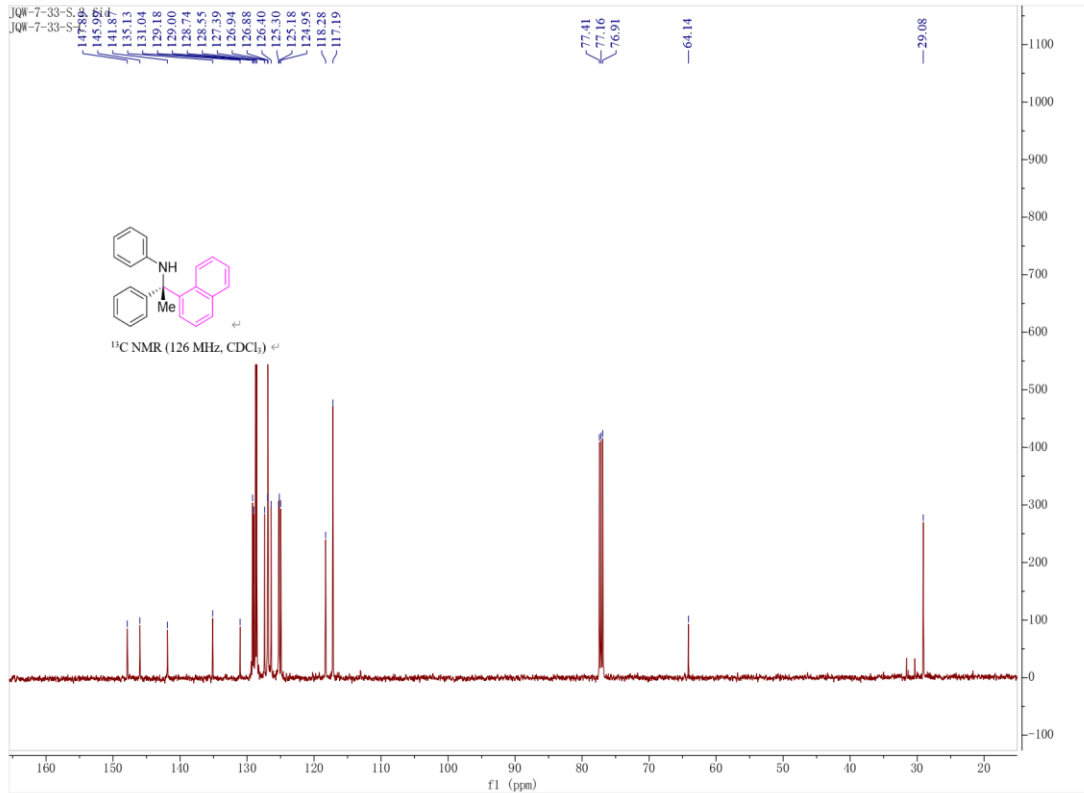

Dibenzyl-(*R*)-1-(4-((1-(naphthalen-1-yl)-1-phenylethyl)amino)phenyl)hydrazine-1,2-dicarboxylate (**3u**)

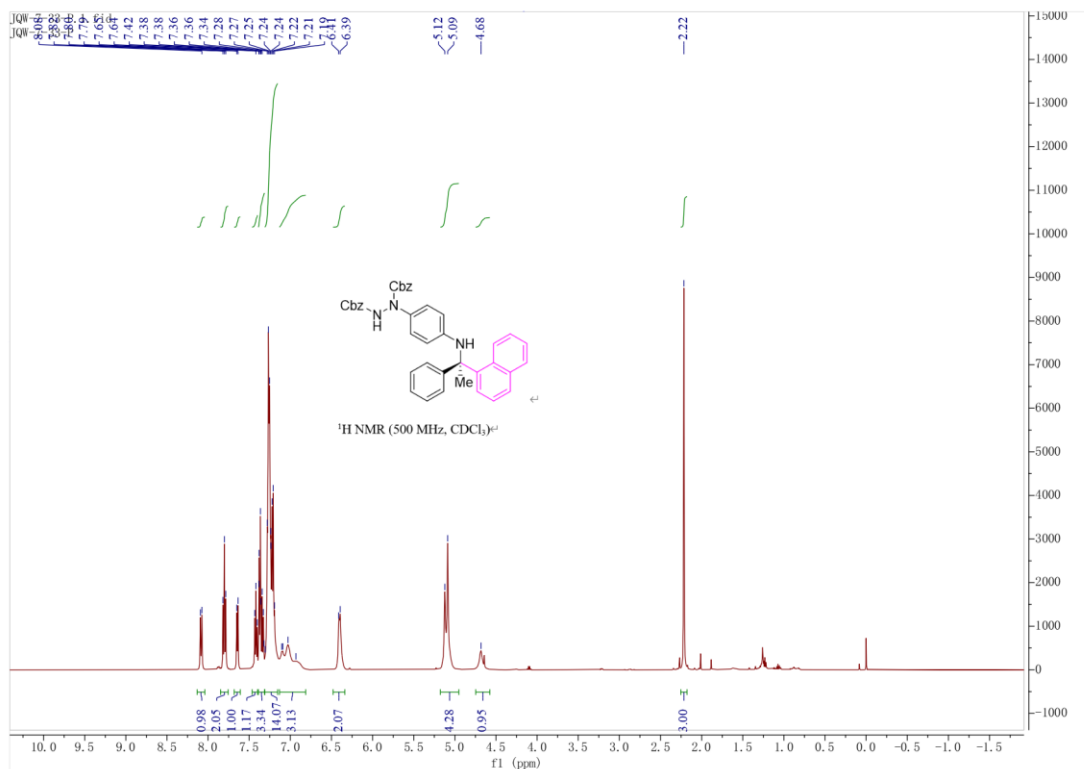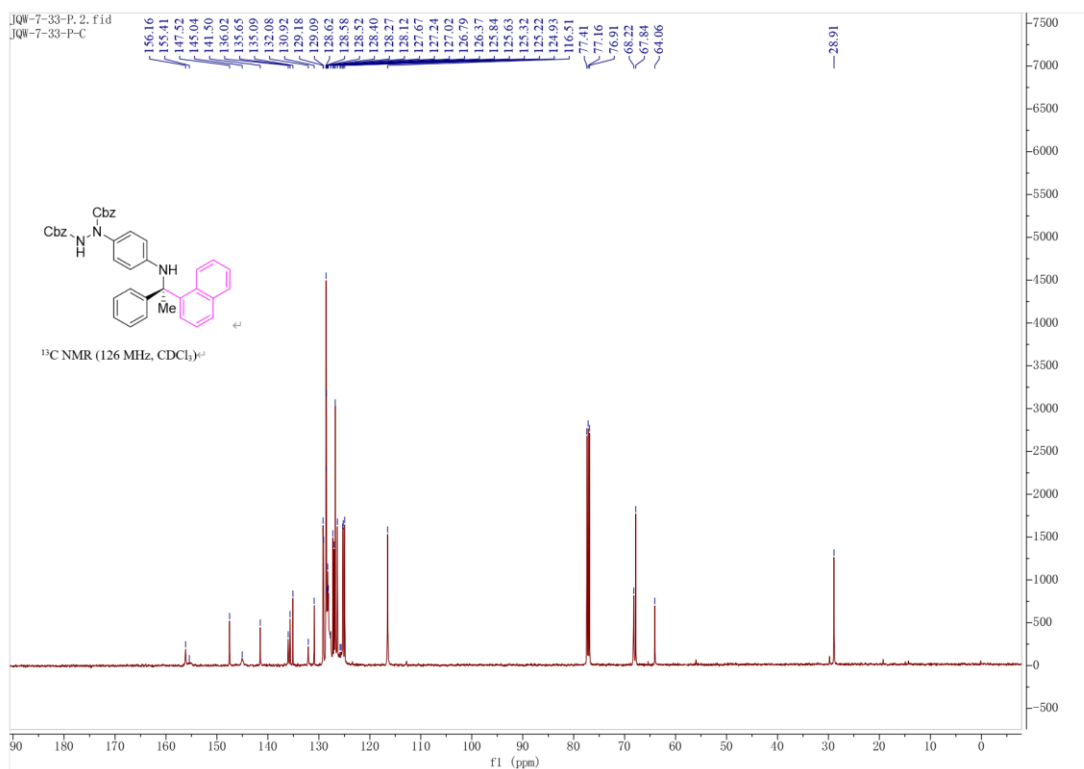



Dibenzyl-(*R*)-1-(4-((1-(2-benzylphenyl)-1-phenylethyl)amino)phenyl)hydrazine-1,2-dicarboxylate (**3v**)

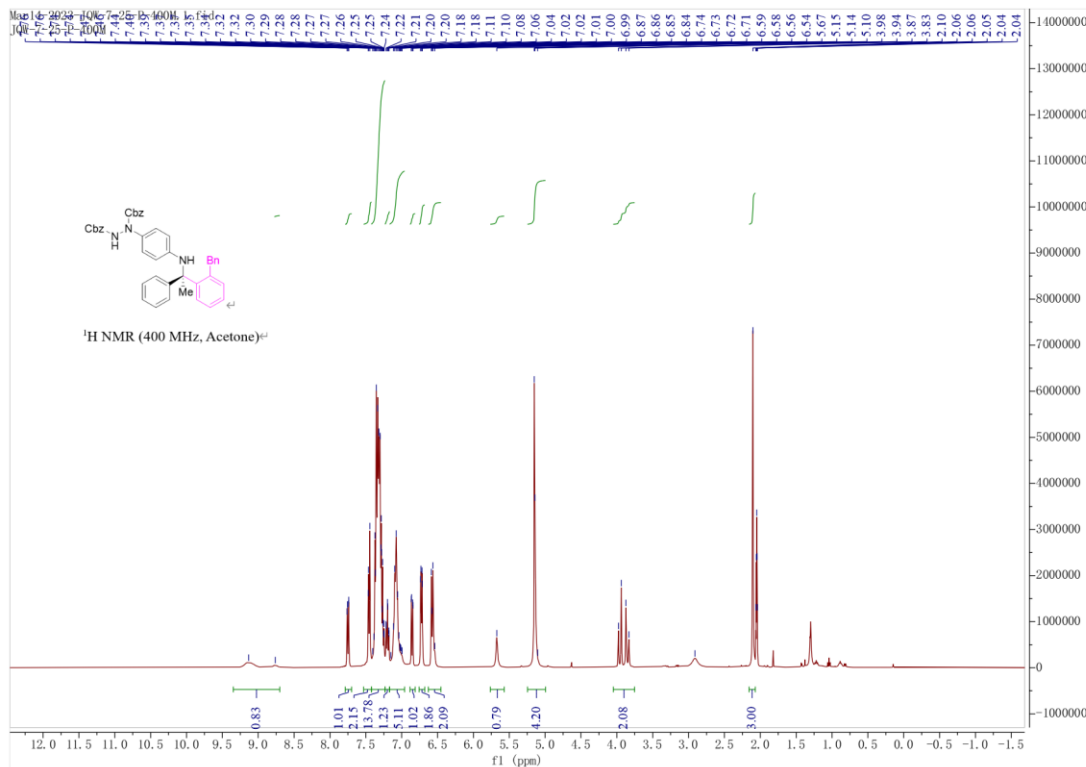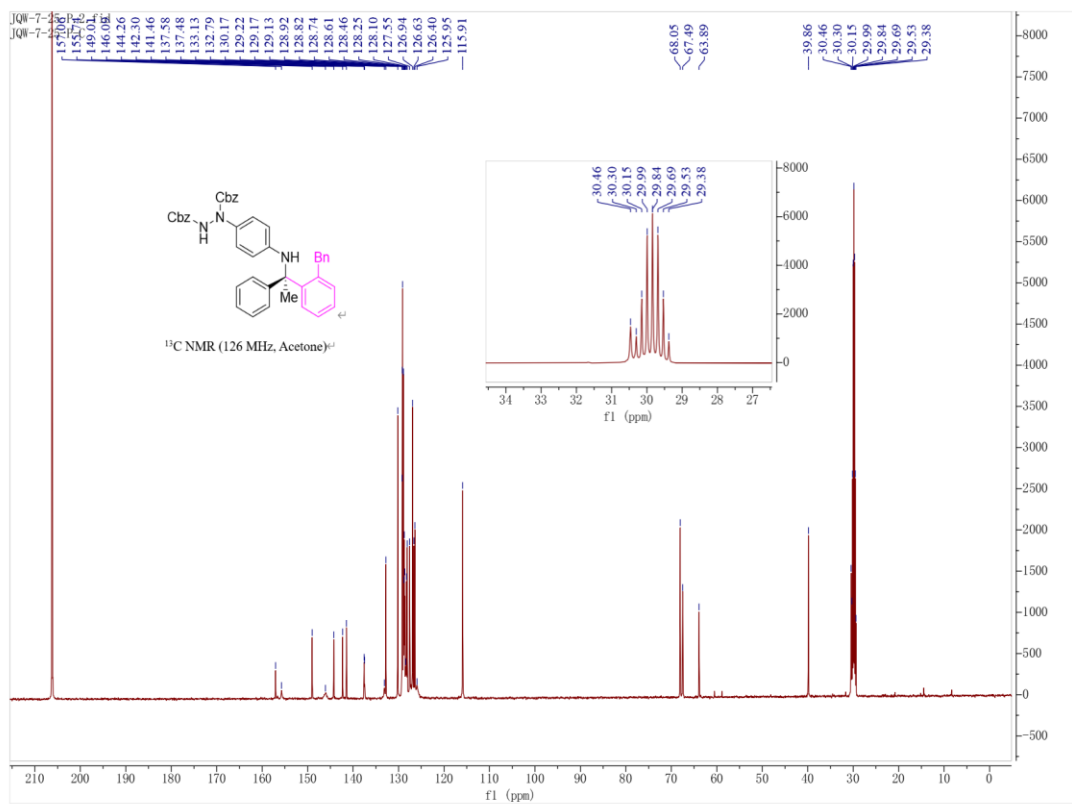



(S)-N-(1-phenyl-1-(o-tolyl)propyl)aniline ((S)-1w)

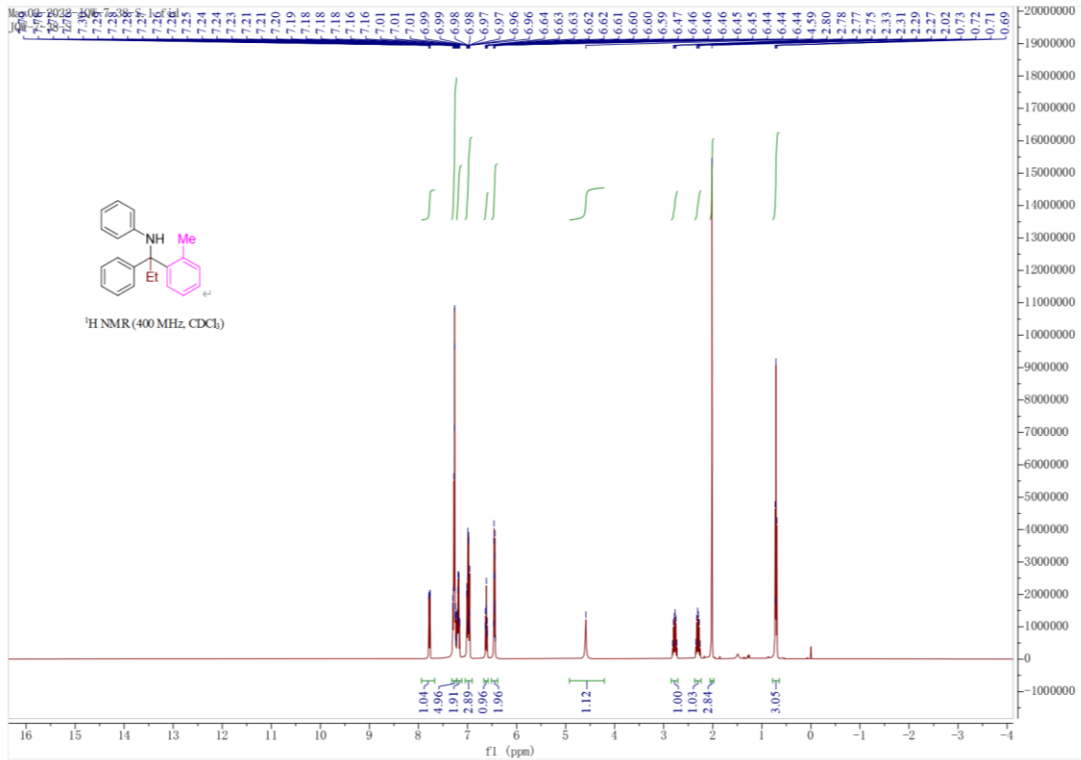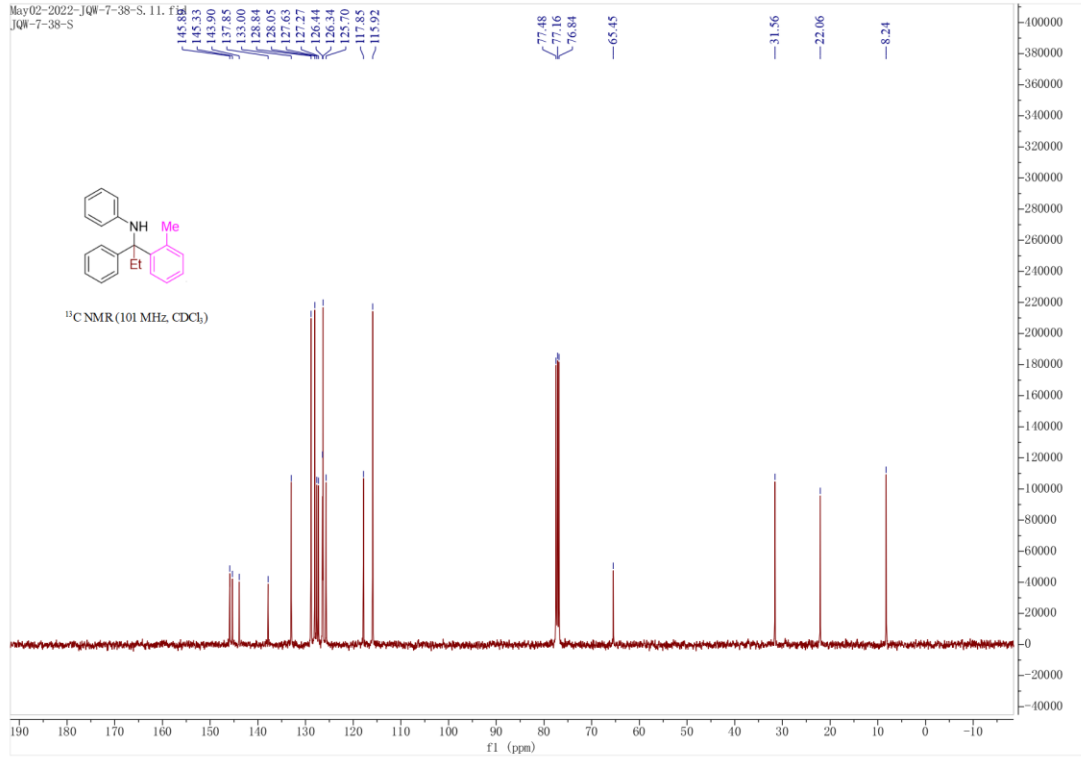

Dibenzyl (R)-1-(4-((1-phenyl-1-(*o*-tolyl)propyl)amino)phenyl)hydrazine-1,2-dicarboxylate

(3w)

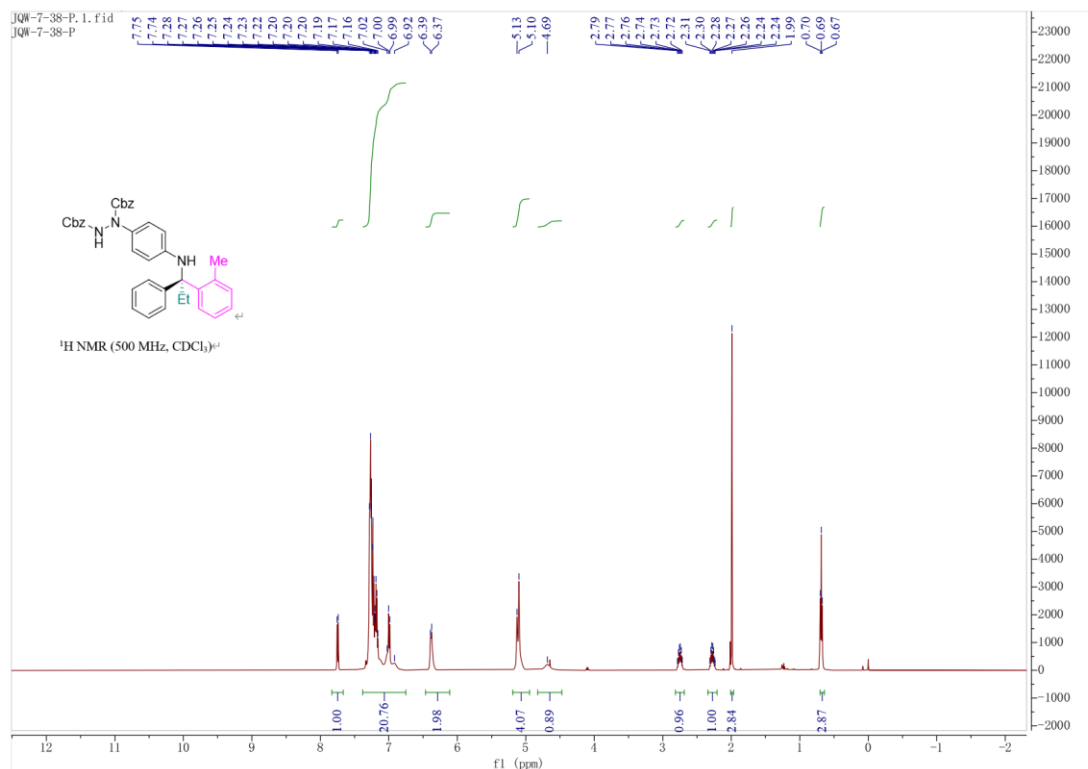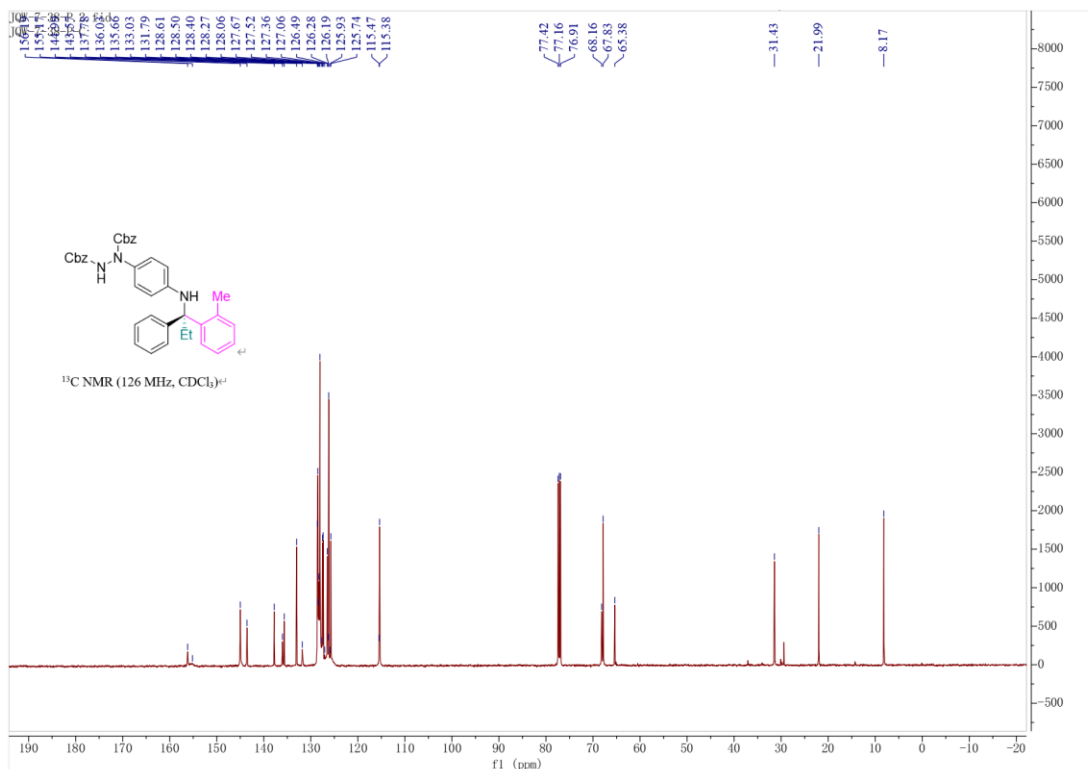

*(S)*-*N*-(1-(2-benzylphenyl)-1-phenylpropyl)aniline (*(S)*-**1x**)

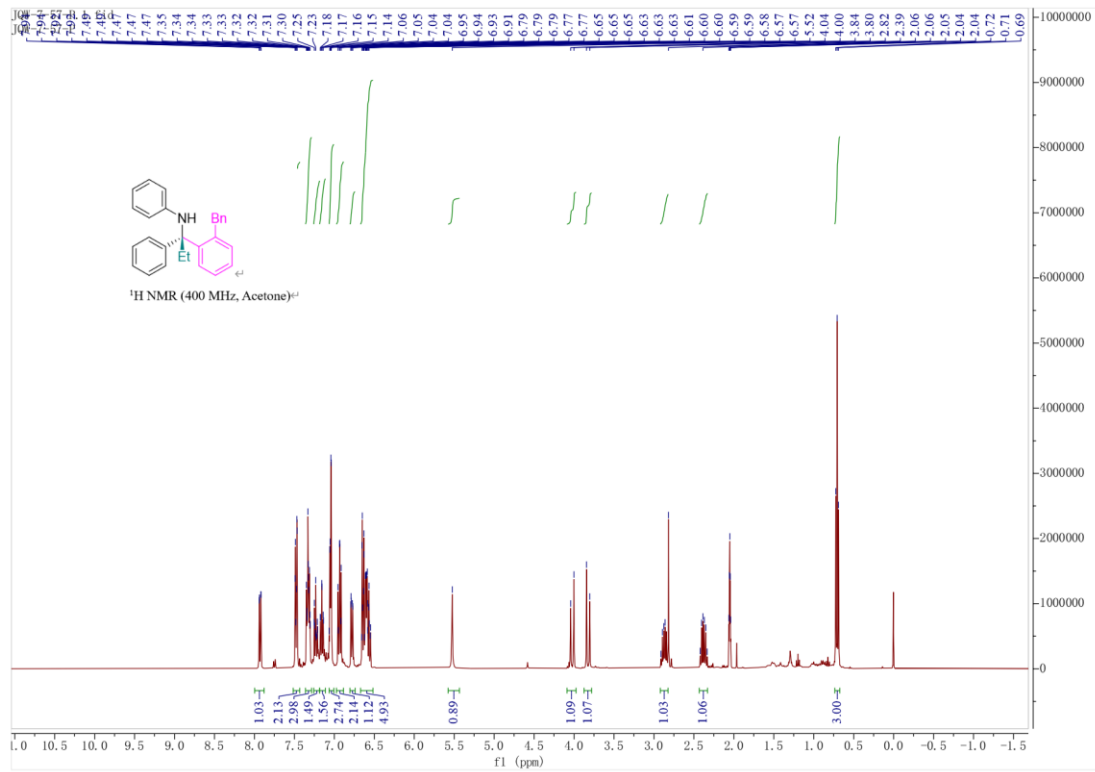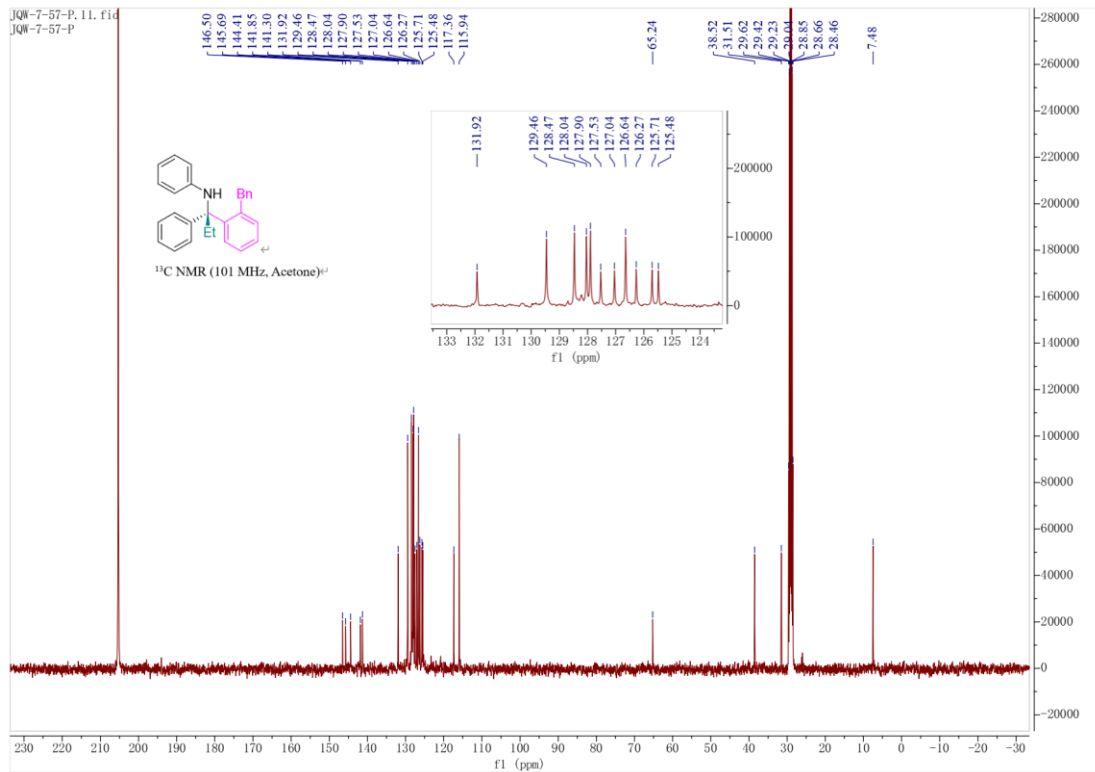

Dibenzyl-(*R*)-1-(4-((1-(2-benzylphenyl)-1-phenylpropyl)amino)phenyl)hydrazine-1,2-dicarboxylate (**3x**)

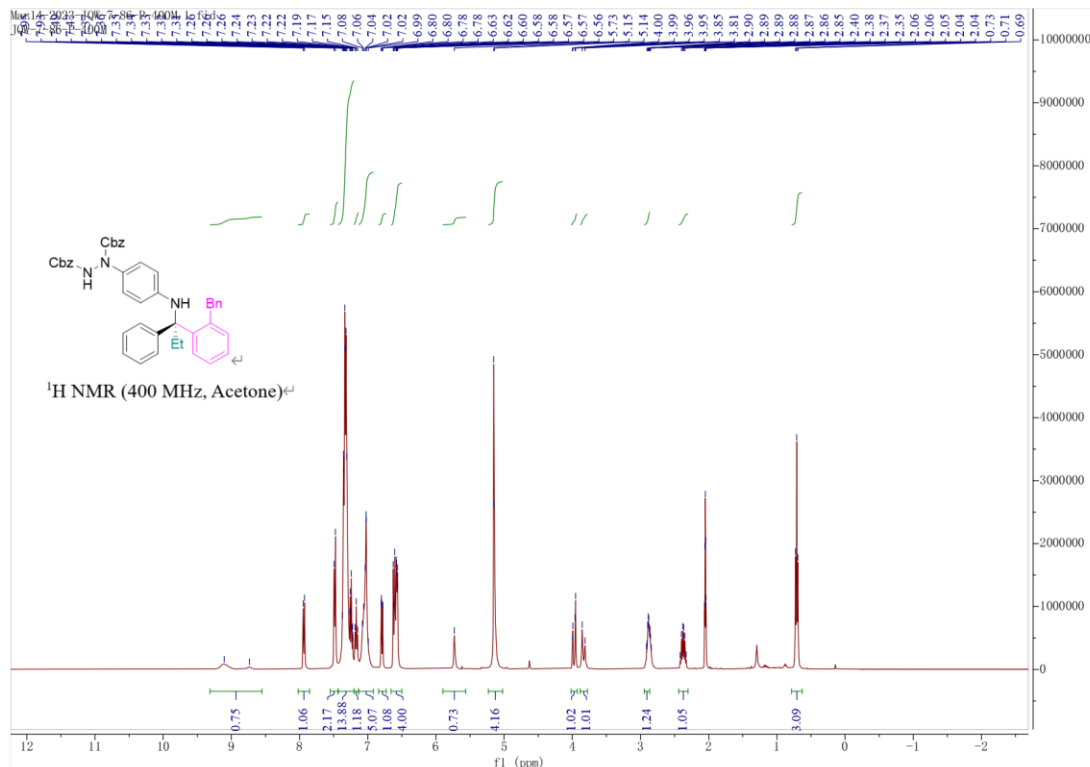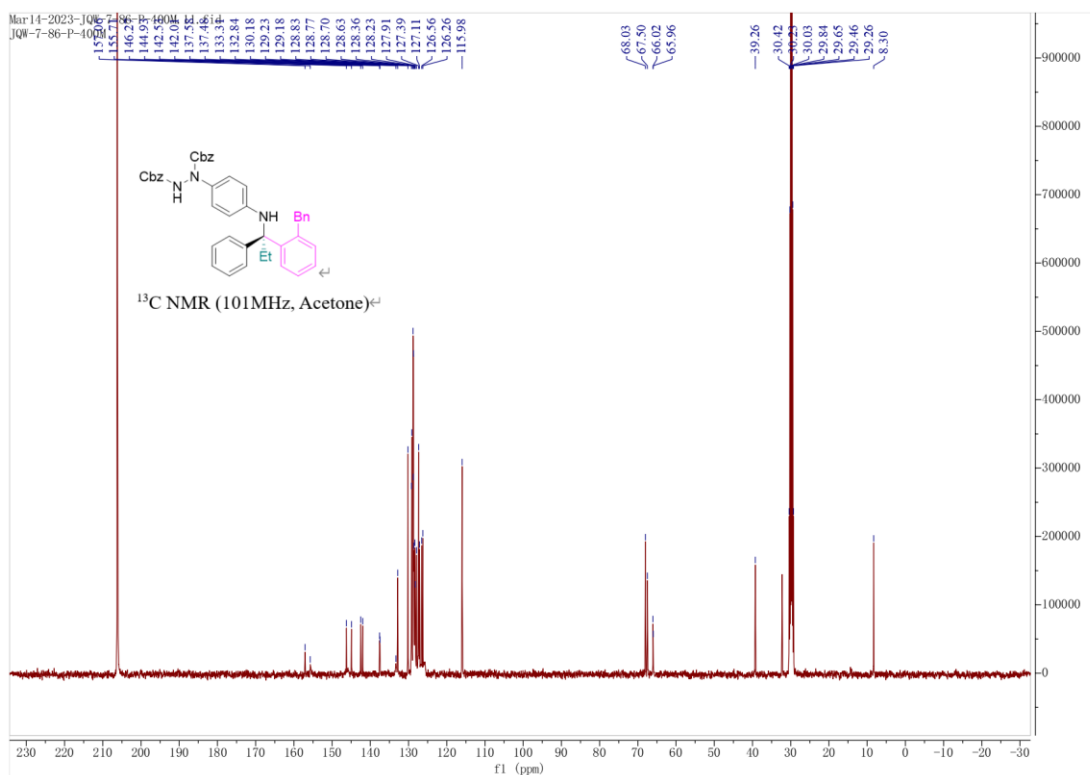

(S)-N-(1-(2-benzylphenyl)-1-phenylpentyl)aniline ((S)-1y)

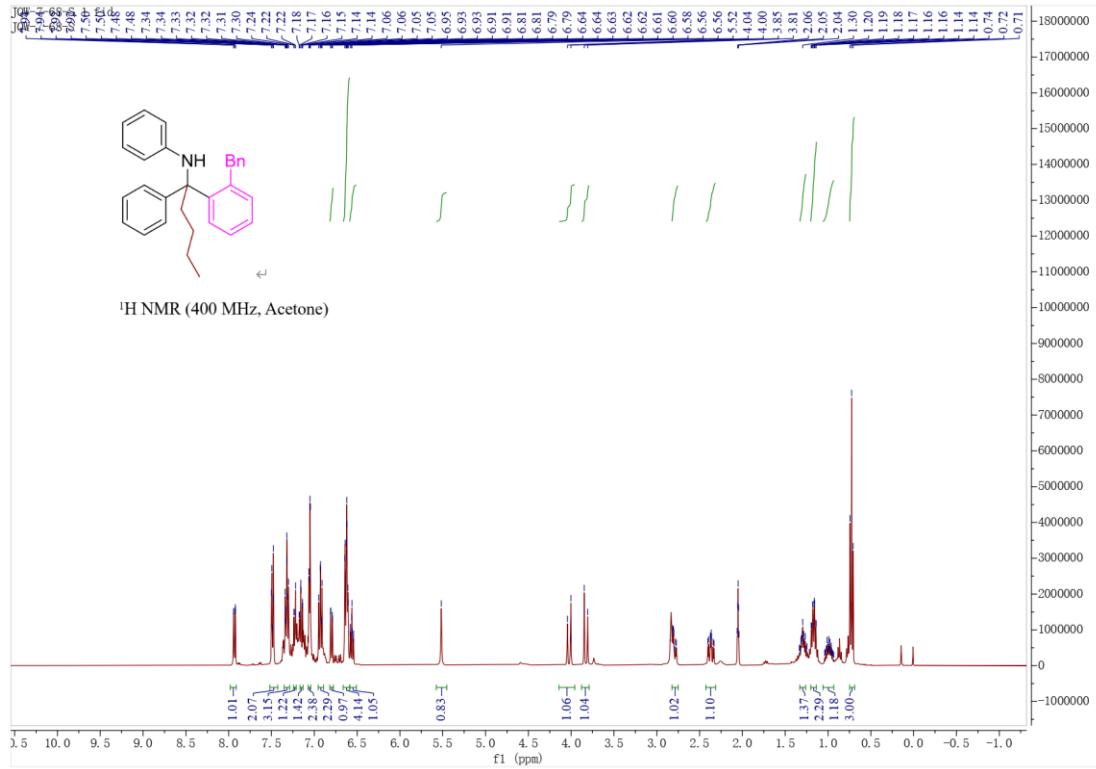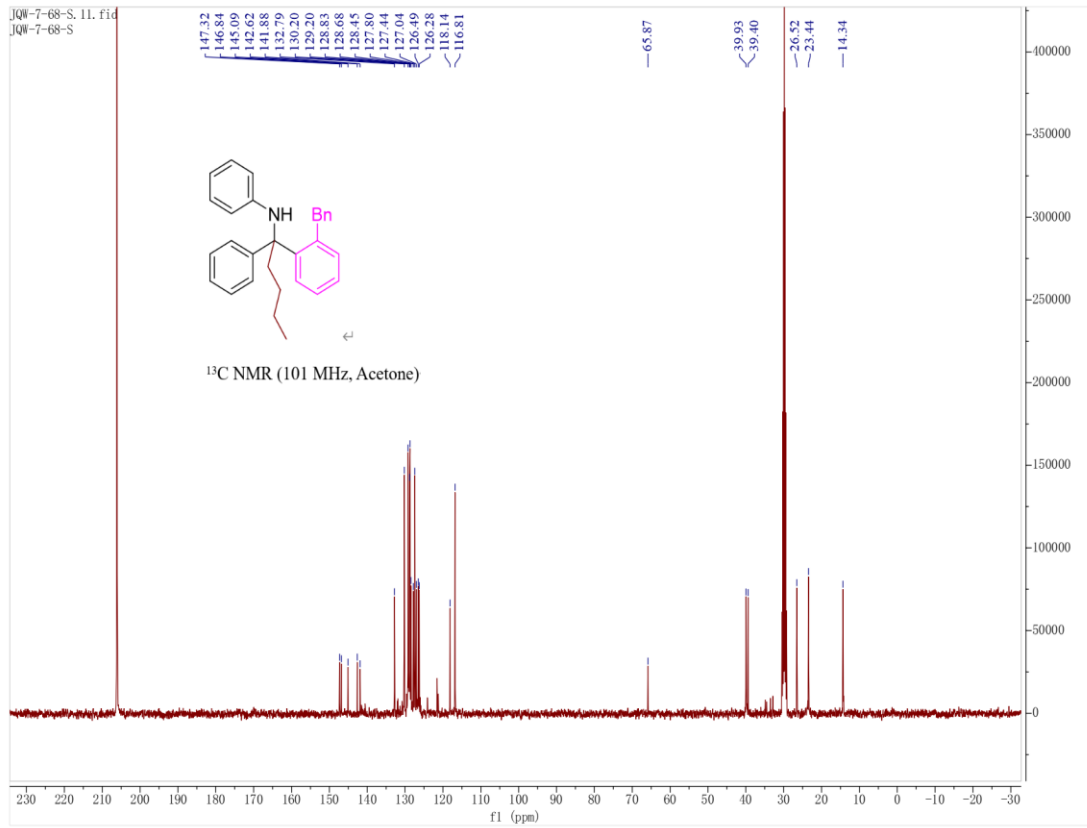

Dibenzyl-(*R*)-1-(4-((1-(2-benzylphenyl)-1-phenylpentyl)amino)phenyl)hydrazine-1,2-dicarboxylate (**3y**)

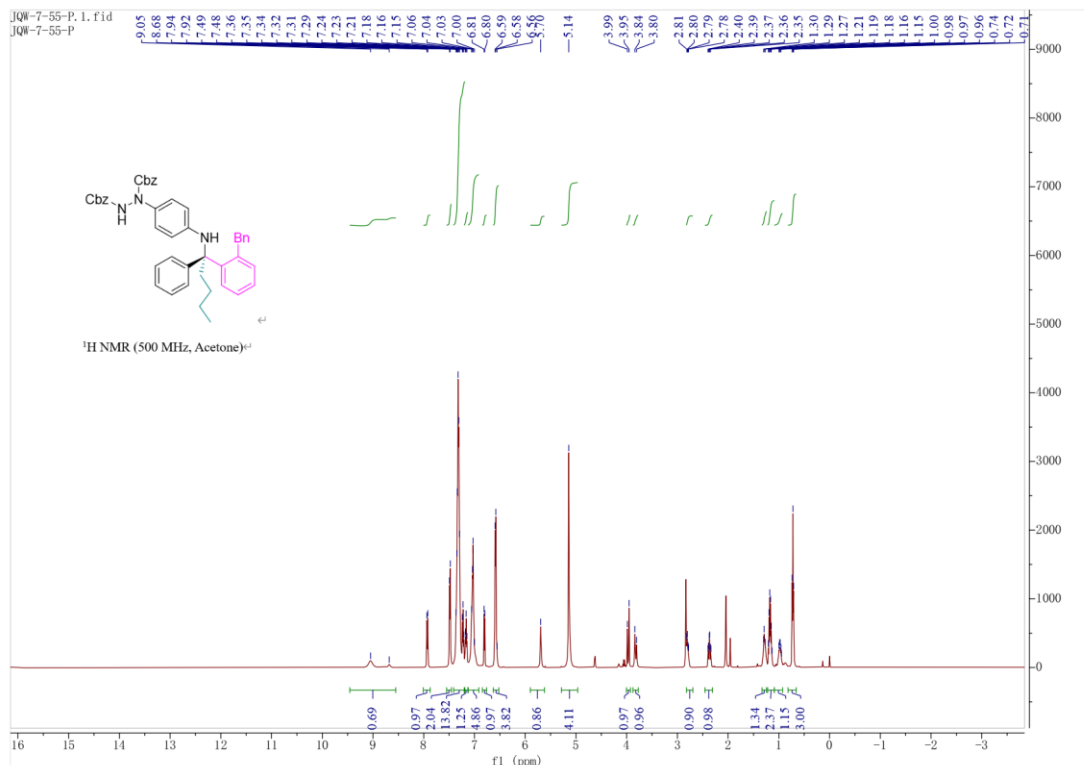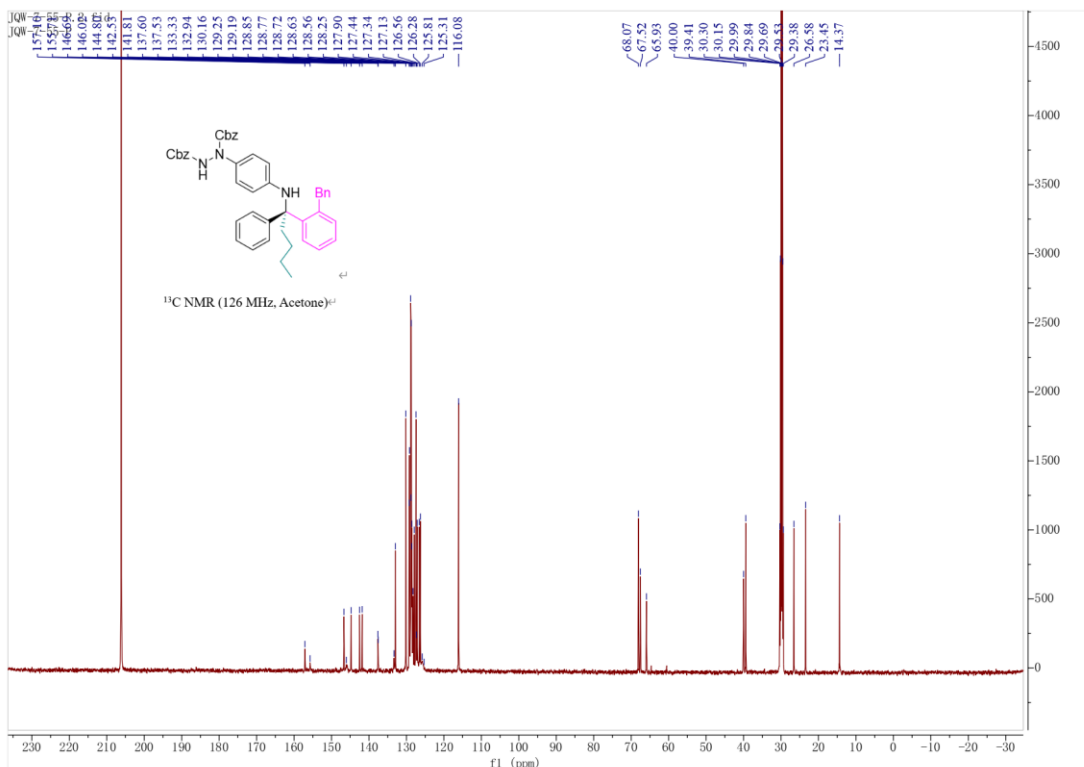

Benzyl (*R*)-4-((1-phenyl-1-(*o*-tolyl)ethyl)amino)phenyl)carbamate (**4a**)

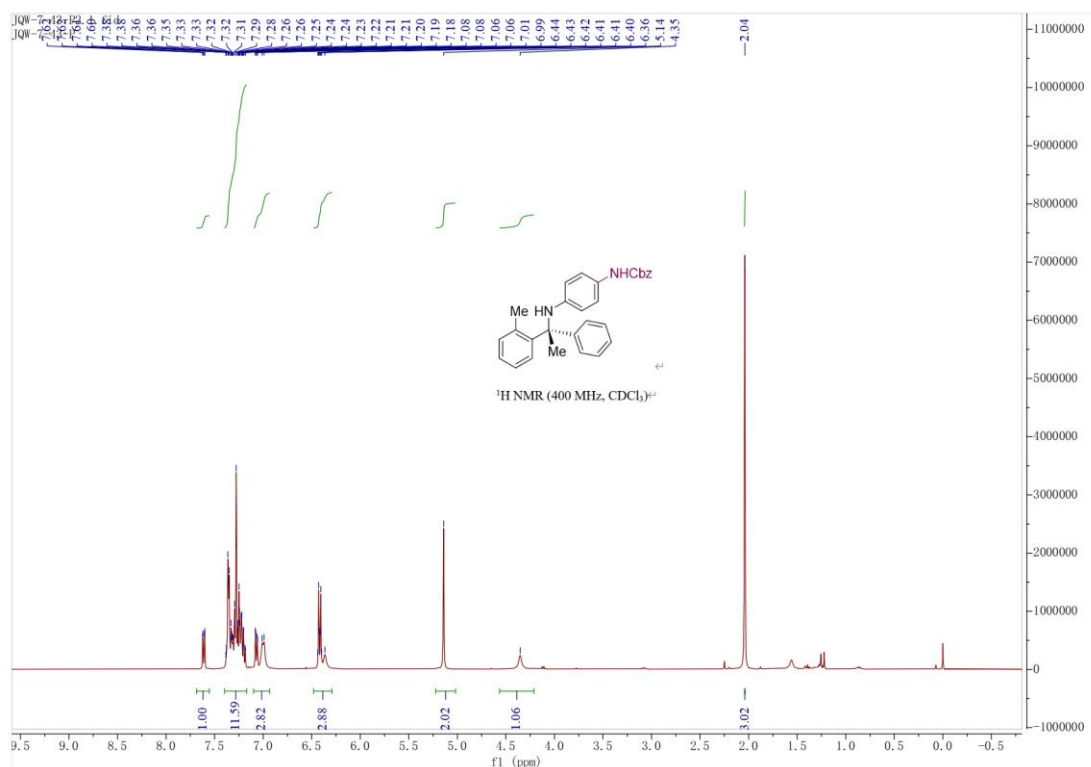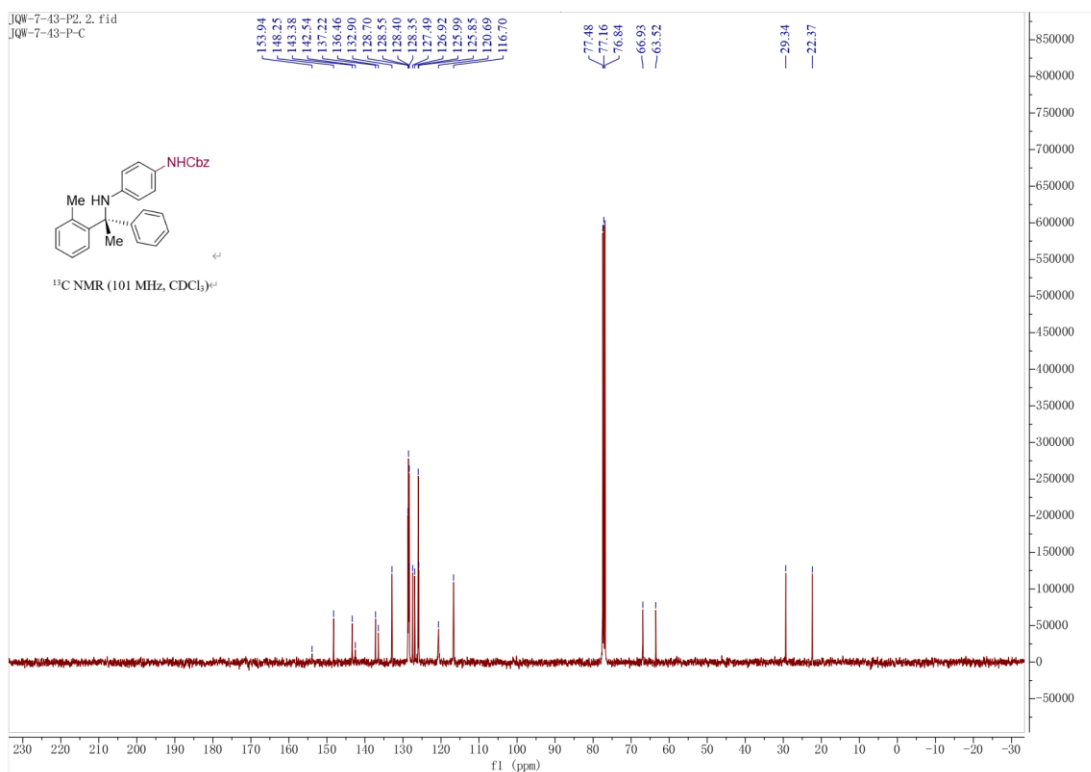

(S)-4-bromo-N-(1-phenyl-1-(*o*-tolyl)ethyl)aniline (**5a**)

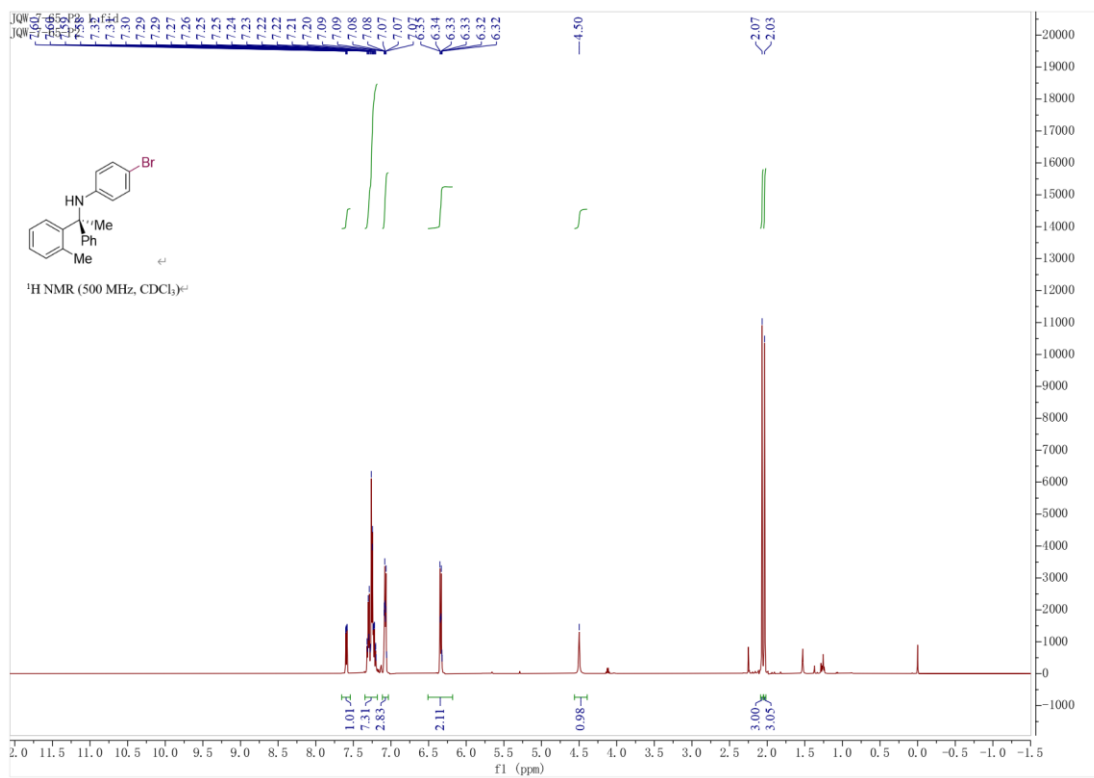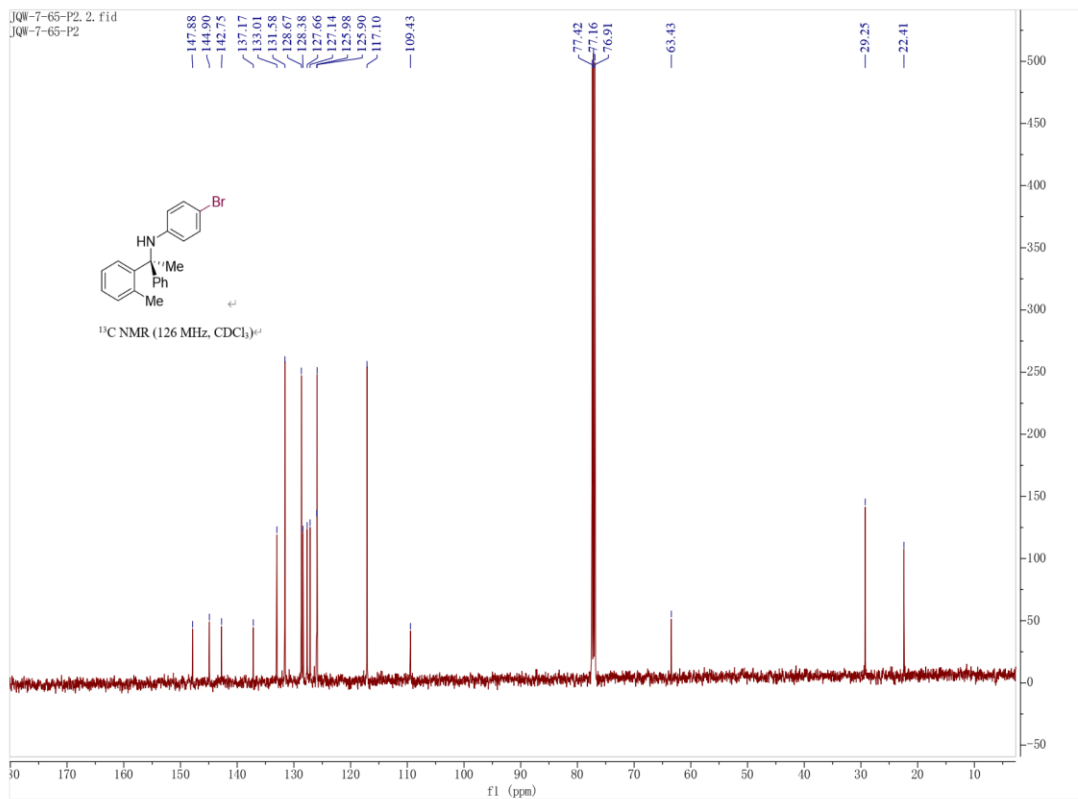



(S)-2,4-dibromo-N-(1-phenyl-1-(o-tolyl)ethyl)aniline (**6a**)

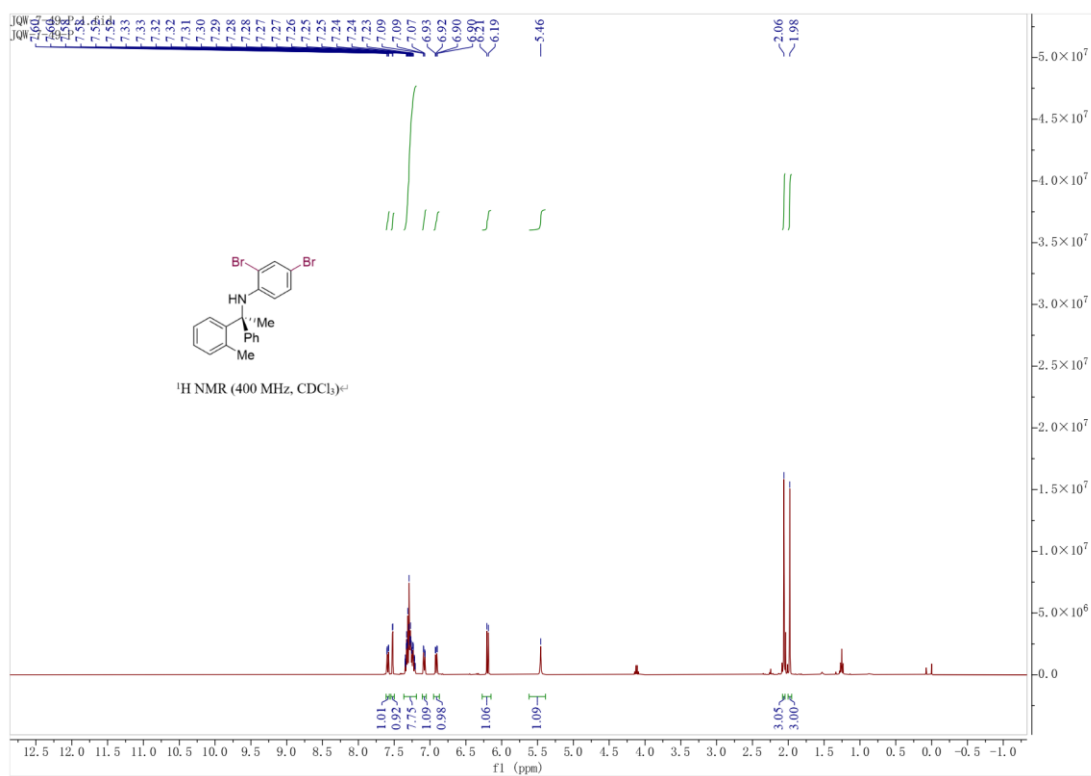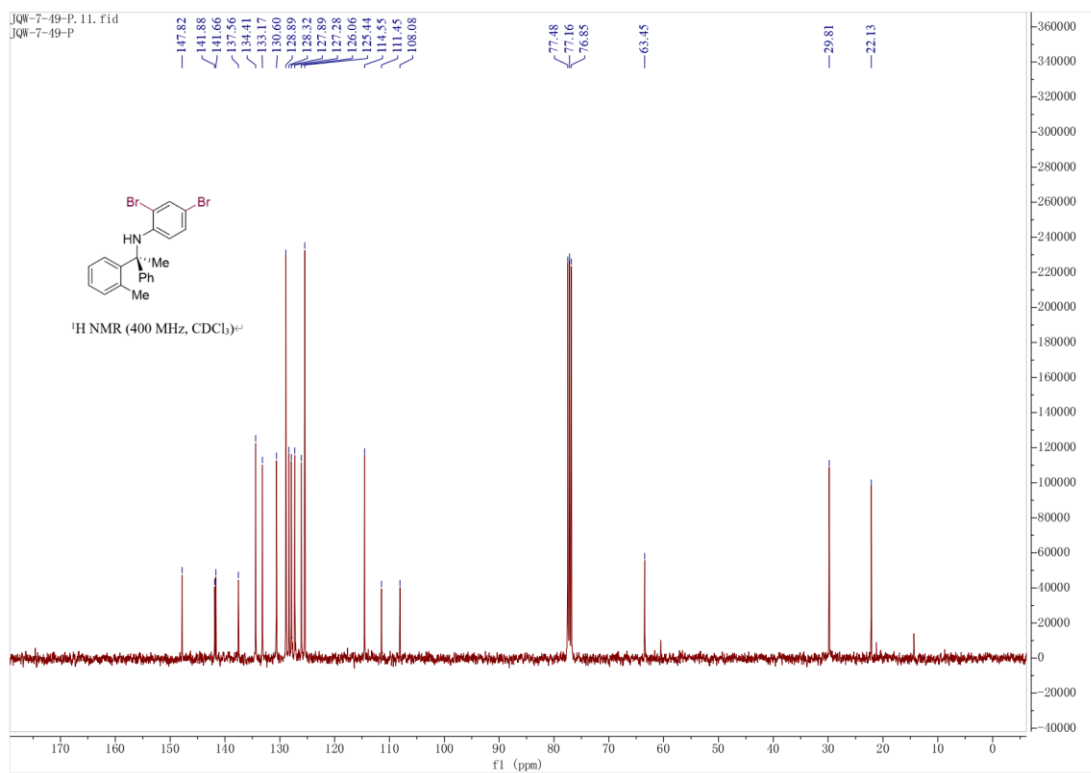

Supplement: d3cc00653k1.pdf [file d3cc00653k1.pdf]
